# Supplementary material for: High S100A9+ cell density predicts a poor prognosis in hepatocellular carcinoma patients after curative resection
Source: Aging (Albany NY). 2021 Jun 22;13(12):16367–80. doi: 10.18632/aging.203162 (PMC8266308; doi:10.18632/aging.203162)
Supplement: Supplementary Table 1 [file aging-13-203162-s001.xlsx]

## Sheet: TCGA_N S100A9 TPM
Supplementary Table 1. TCGA Database for S100A9 Expression.
ENSG_IDs	TCGA_N S100A9 TPM
TCGA-DD-A1EB-11	135.001
TCGA-G3-A3CH-11	31.2345
TCGA-EP-A12J-11	46.0134
TCGA-DD-A3A8-11	48.4175
TCGA-DD-A11A-11	88.0568
TCGA-DD-A39W-11	25.5204
TCGA-DD-A1EC-11	20.0992
TCGA-BC-A10Y-11	50.4975
TCGA-BC-A10R-11	68.1423
TCGA-BD-A2L6-11	48.9368
TCGA-DD-A39Z-11	8.81893
TCGA-ES-A2HT-11	37.4386
TCGA-DD-A11D-11	81.5304
TCGA-BC-A10W-11	63.3388
TCGA-DD-A11B-11	9.86536
TCGA-DD-A39X-11	17.3924
TCGA-DD-A3A5-11	15.1738
TCGA-FV-A3I0-11	96.121
TCGA-DD-A3A4-11	47.4374
TCGA-BC-A10X-11	36.004
TCGA-BC-A10U-11	49.8557
TCGA-DD-A1EJ-11	88.3981
TCGA-DD-A3A3-11	79.0574
TCGA-DD-A39V-11	79.6198
TCGA-BC-A216-11	48.265
TCGA-DD-A113-11	49.0566
TCGA-DD-A1EE-11	51.5433
TCGA-DD-A1EL-11	24.3167
TCGA-FV-A2QR-11	76.1134
TCGA-DD-A1EI-11	13.2423
TCGA-BC-A10Z-11	75.5267
TCGA-FV-A3I1-11	22.1998
TCGA-BD-A3EP-11	75.3192
TCGA-DD-A11C-11	30.7962
TCGA-DD-A114-11	46.1701
TCGA-FV-A3R2-11	43.6351
TCGA-DD-A1EH-11	12.9082
TCGA-DD-A3A1-11	86.3281
TCGA-DD-A1EG-11	82.173
TCGA-BC-A10Q-11	57.9187
TCGA-DD-A119-11	73.2095
TCGA-DD-A3A2-11	14.9628
TCGA-EP-A3RK-11	25.9792
TCGA-BC-A110-11	123.098
TCGA-DD-A116-11	46.8246
TCGA-DD-A118-11	111.931
TCGA-FV-A23B-11	47.0362
TCGA-EP-A26S-11	212.204
TCGA-DD-A3A6-11	2.1749
TCGA-BC-A10T-11	58.4538

## Sheet: TCGA_T S100A9 TPM
ENSG_IDs	TCGA_T S100A9 TPM
TCGA-2Y-A9GS-01	73.7352
TCGA-2Y-A9GT-01	7.99627
TCGA-2Y-A9GU-01	3.0612
TCGA-2Y-A9GV-01	52.8491
TCGA-2Y-A9GX-01	110.594
TCGA-2Y-A9GY-01	169.427
TCGA-2Y-A9GZ-01	14.5815
TCGA-2Y-A9H0-01	12.7188
TCGA-2Y-A9H1-01	36.4532
TCGA-2Y-A9H4-01	6.27512
TCGA-2Y-A9H5-01	9.31548
TCGA-2Y-A9H6-01	60.2451
TCGA-2Y-A9H7-01	8.77488
TCGA-2Y-A9H9-01	13.5717
TCGA-2Y-A9HA-01	47.4196
TCGA-2Y-A9HB-01	8.64031
TCGA-3K-AAZ8-01	12.7145
TCGA-4R-AA8I-01	133.351
TCGA-5C-A9VG-01	13.7313
TCGA-5C-A9VH-01	19.2909
TCGA-5R-AA1C-01	10.4028
TCGA-5R-AA1D-01	37.6977
TCGA-BC-4072-01	58.7642
TCGA-BC-4073-01	170.495
TCGA-BC-A10Q-01	5.64904
TCGA-BC-A10R-01	13.5001
TCGA-BC-A10S-01	58.6181
TCGA-BC-A10T-01	11.3731
TCGA-BC-A10U-01	149.574
TCGA-BC-A10W-01	733.847
TCGA-BC-A10X-01	40.6305
TCGA-BC-A10Y-01	22.1275
TCGA-BC-A10Z-01	7.182
TCGA-BC-A110-01	196.256
TCGA-BC-A112-01	36.7134
TCGA-BC-A216-01	50.5903
TCGA-BC-A217-01	24.5034
TCGA-BC-A3KF-01	4.11142
TCGA-BC-A3KG-01	179.612
TCGA-BC-A5W4-01	5.44084
TCGA-BC-A69H-01	927.118
TCGA-BC-A69I-01	47.5822
TCGA-BC-A8YO-01	21.2317
TCGA-BD-A2L6-01	13.9458
TCGA-BD-A3ER-01	21.8083
TCGA-CC-5258-01	34.9165
TCGA-CC-5259-01	24.334
TCGA-CC-5260-01	21.3092
TCGA-CC-5262-01	335.029
TCGA-CC-5263-01	97.2976
TCGA-CC-5264-01	8.56332
TCGA-CC-A123-01	14.5164
TCGA-CC-A1HT-01	310.426
TCGA-CC-A3MB-01	9.76018
TCGA-CC-A3MC-01	696.641
TCGA-CC-A5UC-01	51.5534
TCGA-CC-A5UD-01	10.3723
TCGA-CC-A5UE-01	16.6086
TCGA-CC-A7IE-01	33.1739
TCGA-CC-A7IF-01	2.0682
TCGA-CC-A7IG-01	6985.81
TCGA-CC-A7IH-01	3.81195
TCGA-CC-A7II-01	46.631
TCGA-CC-A7IK-01	10.0369
TCGA-CC-A7IL-01	4.02315
TCGA-CC-A8HS-01	18.1792
TCGA-CC-A8HU-01	110.615
TCGA-CC-A8HV-01	2093.14
TCGA-CC-A9FS-01	3.28776
TCGA-DD-A113-01	29.7301
TCGA-DD-A114-01	132.867
TCGA-DD-A115-01	11.9555
TCGA-DD-A116-01	20.2577
TCGA-DD-A118-01	4.02408
TCGA-DD-A119-01	35.0972
TCGA-DD-A11A-01	29.3766
TCGA-DD-A11B-01	5.33248
TCGA-DD-A11C-01	14.5137
TCGA-DD-A11D-01	9.95705
TCGA-DD-A1EA-01	21.2036
TCGA-DD-A1EB-01	11.4767
TCGA-DD-A1EC-01	90.8671
TCGA-DD-A1ED-01	48.0869
TCGA-DD-A1EE-01	21.7083
TCGA-DD-A1EH-01	15.0722
TCGA-DD-A1EI-01	18.2272
TCGA-DD-A1EJ-01	19.2931
TCGA-DD-A1EK-01	125.404
TCGA-DD-A1EL-01	10.2075
TCGA-DD-A39V-01	66.4757
TCGA-DD-A39W-01	13.8056
TCGA-DD-A39X-01	206.419
TCGA-DD-A39Y-01	112.886
TCGA-DD-A39Z-01	3.1424
TCGA-DD-A3A1-01	64.8415
TCGA-DD-A3A2-01	5.98806
TCGA-DD-A3A3-01	131.22
TCGA-DD-A3A4-01	5.90632
TCGA-DD-A3A5-01	3.25567
TCGA-DD-A3A7-01	3506.08
TCGA-DD-A3A8-01	16.2246
TCGA-DD-A3A9-01	554.49
TCGA-DD-A4NA-01	49.9307
TCGA-DD-A4NB-01	13.1727
TCGA-DD-A4ND-01	57.2847
TCGA-DD-A4NE-01	13.0004
TCGA-DD-A4NF-01	6.19308
TCGA-DD-A4NG-01	445.415
TCGA-DD-A4NH-01	1439.66
TCGA-DD-A4NI-01	12.8824
TCGA-DD-A4NJ-01	58.8191
TCGA-DD-A4NK-01	22.4932
TCGA-DD-A4NL-01	14.2955
TCGA-DD-A4NN-01	64.9333
TCGA-DD-A4NO-01	17.0768
TCGA-DD-A4NP-01	11.653
TCGA-DD-A4NQ-01	147.594
TCGA-DD-A4NV-01	26.1745
TCGA-DD-A73A-01	13.5867
TCGA-DD-A73B-01	5.12949
TCGA-DD-A73C-01	8.26179
TCGA-DD-A73D-01	6.4159
TCGA-DD-A73E-01	4.68087
TCGA-DD-A73F-01	18.4119
TCGA-DD-A73G-01	28.5252
TCGA-DD-AAC8-01	65.2449
TCGA-DD-AAC9-01	28.4463
TCGA-DD-AACA-01	7.33351
TCGA-DD-AACC-01	73.5359
TCGA-DD-AACD-01	18.3469
TCGA-DD-AACE-01	4.17696
TCGA-DD-AACF-01	32.0509
TCGA-DD-AACG-01	36.6737
TCGA-DD-AACH-01	18.6383
TCGA-DD-AACI-01	138.582
TCGA-DD-AACJ-01	28.8757
TCGA-DD-AACK-01	16.2265
TCGA-DD-AACL-01	5910.93
TCGA-DD-AACN-01	13.4767
TCGA-DD-AACP-01	11.4203
TCGA-DD-AACQ-01	19.9494
TCGA-DD-AACS-01	19.9644
TCGA-DD-AACT-01	34.9403
TCGA-DD-AACU-01	45.8007
TCGA-DD-AACV-01	2.066
TCGA-DD-AACW-01	6.02424
TCGA-DD-AACX-01	44.6363
TCGA-DD-AACY-01	3.53083
TCGA-DD-AAD0-01	15.343
TCGA-DD-AAD2-01	32.9721
TCGA-DD-AAD3-01	13.8747
TCGA-DD-AAD5-01	1357.67
TCGA-DD-AAD6-01	2.94926
TCGA-DD-AAD8-01	30.1466
TCGA-DD-AADA-01	27.946
TCGA-DD-AADB-01	28.2291
TCGA-DD-AADC-01	10.5344
TCGA-DD-AADD-01	6.63836
TCGA-DD-AADG-01	2.94582
TCGA-DD-AADI-01	22.9312
TCGA-DD-AADJ-01	9.22476
TCGA-DD-AADL-01	8.35982
TCGA-DD-AADM-01	24.1753
TCGA-DD-AADO-01	35.3851
TCGA-DD-AADP-01	25.8331
TCGA-DD-AADQ-01	47.9008
TCGA-DD-AADR-01	2.83376
TCGA-DD-AADS-01	7.99864
TCGA-DD-AADU-01	8.39134
TCGA-DD-AADV-01	10.4802
TCGA-DD-AADW-01	5.29973
TCGA-DD-AADY-01	1.94311
TCGA-DD-AAE1-01	1.38044
TCGA-DD-AAE2-01	16.4135
TCGA-DD-AAE3-01	21.5764
TCGA-DD-AAE4-01	10.9973
TCGA-DD-AAE6-01	27.3045
TCGA-DD-AAE7-01	12.3704
TCGA-DD-AAE9-01	2.57371
TCGA-DD-AAEA-01	3.78062
TCGA-DD-AAEB-01	3.92361
TCGA-DD-AAED-01	23.2232
TCGA-DD-AAEE-01	1.85295
TCGA-DD-AAEG-01	94.9999
TCGA-DD-AAEH-01	7.79326
TCGA-DD-AAEI-01	3.64038
TCGA-DD-AAEK-01	45.0699
TCGA-DD-AAVP-01	31.0911
TCGA-DD-AAVQ-01	15.8973
TCGA-DD-AAVR-01	81.8511
TCGA-DD-AAVS-01	25.0749
TCGA-DD-AAVU-01	6.38975
TCGA-DD-AAVV-01	28.2683
TCGA-DD-AAVW-01	10.9523
TCGA-DD-AAVX-01	16.3321
TCGA-DD-AAVY-01	18.9112
TCGA-DD-AAVZ-01	15.0375
TCGA-DD-AAW0-01	62.7413
TCGA-DD-AAW1-01	8.4706
TCGA-DD-AAW2-01	18.2281
TCGA-DD-AAW3-01	18.1708
TCGA-ED-A459-01	84.651
TCGA-ED-A4XI-01	61.3767
TCGA-ED-A627-01	79.5678
TCGA-ED-A66Y-01	2.51738
TCGA-ED-A7PX-01	21.2377
TCGA-ED-A7PY-01	8.84209
TCGA-ED-A7PZ-01	6.66273
TCGA-ED-A7XP-01	27.202
TCGA-ED-A8O5-01	5.35157
TCGA-ED-A8O6-01	48.4749
TCGA-EP-A12J-01	15.1933
TCGA-EP-A26S-01	7.71431
TCGA-EP-A2KA-01	44.1435
TCGA-EP-A2KB-01	7.99526
TCGA-EP-A2KC-01	14.9613
TCGA-EP-A3JL-01	66.5049
TCGA-EP-A3RK-01	99.3353
TCGA-ES-A2HS-01	11.8585
TCGA-ES-A2HT-01	129.72
TCGA-FV-A23B-01	8.78207
TCGA-FV-A2QQ-01	38.2095
TCGA-FV-A2QR-01	14.5836
TCGA-FV-A3I0-01	56.6619
TCGA-FV-A3I1-01	103.998
TCGA-FV-A3R2-01	18.6698
TCGA-FV-A3R3-01	20.4696
TCGA-FV-A495-01	58.3447
TCGA-FV-A496-01	12.0139
TCGA-FV-A4ZP-01	282.574
TCGA-FV-A4ZQ-01	54.2558
TCGA-G3-A25S-01	767.759
TCGA-G3-A25U-01	25.7569
TCGA-G3-A25V-01	67.7453
TCGA-G3-A25Y-01	35.8353
TCGA-G3-A25Z-01	18.3428
TCGA-G3-A3CG-01	30.9298
TCGA-G3-A3CH-01	6.40704
TCGA-G3-A3CI-01	75.6647
TCGA-G3-A3CJ-01	10.6537
TCGA-G3-A3CK-01	13.2371
TCGA-G3-A5SI-01	2.30679
TCGA-G3-A5SJ-01	139.754
TCGA-G3-A5SK-01	15.3162
TCGA-G3-A5SL-01	10.9281
TCGA-G3-A5SM-01	88.9749
TCGA-G3-A6UC-01	7.84642
TCGA-G3-A7M5-01	24.9721
TCGA-G3-A7M7-01	18.0907
TCGA-G3-A7M8-01	10.2513
TCGA-G3-AAUZ-01	15.7199
TCGA-G3-AAV0-01	3.03338
TCGA-G3-AAV1-01	9.05799
TCGA-G3-AAV2-01	14.1184
TCGA-G3-AAV4-01	4.63375
TCGA-G3-AAV5-01	16.7769
TCGA-G3-AAV6-01	21.7933
TCGA-GJ-A9DB-01	29.6987
TCGA-HP-A5MZ-01	130.421
TCGA-HP-A5N0-01	17.4997
TCGA-K7-A5RF-01	50.0917
TCGA-K7-A6G5-01	32.1273
TCGA-K7-AAU7-01	161.539
TCGA-KR-A7K0-01	11.9805
TCGA-KR-A7K2-01	4.26532
TCGA-KR-A7K7-01	124.362
TCGA-KR-A7K8-01	20.195
TCGA-LG-A6GG-01	70.3392
TCGA-LG-A9QC-01	9.61862
TCGA-LG-A9QD-01	5.03867
TCGA-MI-A75C-01	1051.67
TCGA-MI-A75E-01	35.0954
TCGA-MI-A75G-01	20.9437
TCGA-MI-A75H-01	5.74832
TCGA-MI-A75I-01	53.4413
TCGA-MR-A520-01	32.011
TCGA-NI-A4U2-01	10.461
TCGA-NI-A8LF-01	4.11382
TCGA-O8-A75V-01	49.167
TCGA-QA-A7B7-01	6.37748
TCGA-RC-A6M4-01	2.64538
TCGA-RC-A6M5-01	23.0837
TCGA-RC-A6M6-01	106.33
TCGA-RC-A7S9-01	6.83146
TCGA-RC-A7SB-01	102.594
TCGA-RC-A7SF-01	12.6393
TCGA-RC-A7SH-01	10.6752
TCGA-RC-A7SK-01	1.51797
TCGA-T1-A6J8-01	17.6527
TCGA-UB-A7MA-01	24.1158
TCGA-UB-A7MB-01	12.9568
TCGA-UB-A7MC-01	8.89657
TCGA-UB-A7MD-01	76.6738
TCGA-UB-A7ME-01	17.767
TCGA-UB-AA0U-01	45.647
TCGA-UB-AA0V-01	11.9883
TCGA-WJ-A86L-01	23.1694
TCGA-WQ-A9G7-01	10.2506
TCGA-WQ-AB4B-01	17.1195
TCGA-WX-AA44-01	20.4665
TCGA-WX-AA46-01	45.8222
TCGA-WX-AA47-01	26.1802
TCGA-XR-A8TC-01	8.85058
TCGA-XR-A8TD-01	75.2283
TCGA-XR-A8TE-01	11.5244
TCGA-XR-A8TF-01	6.12856
TCGA-XR-A8TG-01	40.0795
TCGA-YA-A8S7-01	1485.11
TCGA-ZP-A9CV-01	68.6611
TCGA-ZP-A9CY-01	24.2181
TCGA-ZP-A9CZ-01	64.7146
TCGA-ZP-A9D0-01	12.786
TCGA-ZP-A9D1-01	48.1435
TCGA-ZP-A9D4-01	12.8917
TCGA-ZS-A9CD-01	99.0083
TCGA-ZS-A9CE-01	13.4037
TCGA-ZS-A9CF-01	13.889
TCGA-ZS-A9CG-01	31.4176
TCGA-2Y-A9GW-01	37.9886
TCGA-2Y-A9H2-01	50.9147
TCGA-2Y-A9H3-01	22.4912
TCGA-2Y-A9H8-01	518.056
TCGA-5C-AAPD-01	54.4277
TCGA-5R-AAAM-01	34.3353
TCGA-BD-A3EP-01	11.1534
TCGA-BW-A5NO-01	194.566
TCGA-CC-5261-01	471.737
TCGA-CC-A3M9-01	567.589
TCGA-CC-A3MA-01	28.493
TCGA-CC-A7IJ-01	46.8032
TCGA-CC-A8HT-01	138.031
TCGA-CC-A9FW-01	112.394
TCGA-DD-A1EF-01	9.88437
TCGA-DD-A1EG-01	43.5416
TCGA-DD-A3A6-01	7.82084
TCGA-DD-A4NR-01	642.826
TCGA-DD-A4NS-01	53.975
TCGA-DD-AA3A-01	10.5398
TCGA-DD-AACB-01	61.3347
TCGA-DD-AACO-01	12.062
TCGA-DD-AACZ-01	93.3221
TCGA-DD-AAD1-01	13.3502
TCGA-DD-AADF-01	4.52364
TCGA-DD-AADK-01	53.1896
TCGA-DD-AADN-01	28.9484
TCGA-DD-AAE0-01	63.5605
TCGA-ED-A5KG-01	35.4278
TCGA-ED-A66X-01	48.8176
TCGA-ED-A7XO-01	73.7321
TCGA-ED-A82E-01	56.6804
TCGA-ED-A97K-01	84.9607
TCGA-G3-A25T-01	54.3117
TCGA-G3-A25X-01	199.362
TCGA-G3-A7M6-01	569.173
TCGA-G3-A7M9-01	513.809
TCGA-G3-AAV3-01	49.1252
TCGA-G3-AAV7-01	259.646
TCGA-GJ-A3OU-01	106.053
TCGA-GJ-A6C0-01	425.305
TCGA-K7-A5RG-01	18.2512
TCGA-MR-A8JO-01	50.8842
TCGA-PD-A5DF-01	70.8714
TCGA-RG-A7D4-01	28.2768
TCGA-UB-A7MF-01	23.2021
TCGA-ZP-A9D2-01	66.4118
