# Supplementary material for: High S100A9+ cell density predicts a poor prognosis in hepatocellular carcinoma patients after curative resection
Source: Aging (Albany NY). 2021 Jun 22;13(12):16367–80. doi: 10.18632/aging.203162 (PMC8266308; doi:10.18632/aging.203162)
Supplement: Supplementary Table 2 [file aging-13-203162-s002.xlsx]

## Sheet: S100A9 Expression in IHC
Supplementary Table 2. IHC Detection for S100A9 Expression.
Patient.ID	IHC_N S100A9 (cells/mm2)	IHC_T S100A9 (cells/mm2)
1322	272.256	8.03336
1358	180.587	6.08928
1374	459.966	18.2209
1075	770.341	38.082
903	304.462	15.5123
1376	673.853	38.4146
1233	441.827	25.3427
1146	256.009	15.1597
788	741.293	44.058
1072	520.791	33.2116
1196	586.076	39.4966
1204	1270.93	86.6833
915	490.899	33.5954
1014	422.294	29.6575
1064	345.146	25.8415
1011	354.06	27.4333
1213	380.738	32.5924
1136	350.426	30.6663
1062	643.506	56.6093
1502	691.667	62.6783
1186	236.999	22.2029
1381	343.455	33.4062
1464	1008.56	98.1668
1083	497.809	48.6885
859	716.088	72.4033
1284	250.389	25.7344
1545	598.861	63.5744
1132	343.349	37.4632
1126	191.064	21.1025
1342	412.019	47.9597
836	325.865	38.4743
1142	663.126	78.9289
1537	411.614	50.6126
823	202.563	25.4153
891	364.187	45.8614
1141	694.853	88.3713
1527	437.015	56.5805
1436	604.614	79.1639
1641	134.335	17.7131
1007	461.223	61.0293
890	234.751	32.6616
1340	315.011	45.3352
1055	560.059	80.8202
1336	262.451	38.3632
1066	297.981	44.0297
1553	132.29	19.5746
1503	448.474	67.1457
908	483.761	73.4379
796	154.001	23.8166
1089	529.236	83.4637
1487	185.374	30.0679
803	699.033	115.001
1112	239.105	39.9636
1057	323.92	54.6118
1437	185.703	32.0106
849	165.549	29.1578
887	724.135	128.357
816	837.265	152.159
1468	1188.41	217.627
1209	193.679	35.7288
1012	402.812	74.3754
1532	821.711	152.53
1391	490.478	91.6567
1385	459.954	86.2884
1483	189.526	35.6417
815	405.42	76.8429
858	287.551	55.747
1165	213.746	42.5393
1539	200.577	40.2332
1546	394.344	80.1067
1144	284.021	58.0559
1551	505.293	103.942
1407	97.0207	20.1277
1535	499.172	105.766
770	301.273	63.9281
1188	357.806	76.2257
1134	306.19	65.4813
1107	432.319	93.1957
1394	465.953	100.647
1469	538.215	120.773
1427	64.6251	14.5119
1401	114.81	26.1175
1485	295.484	68.7025
765	349.81	81.6882
845	155.717	37.3079
758	370.624	89.9675
1302	374.117	91.4635
1426	330.903	81.8634
1115	184.466	46.0918
1037	194.79	49.1027
1403	250.138	63.7036
1078	272.373	69.9541
1085	362.947	94.3327
1079	578.026	150.563
865	173.026	46.2677
1384	277.56	74.6798
1148	266.842	71.8444
1168	210.14	57.04
1398	552.923	150.62
1229	132.182	36.3244
1530	1036.31	284.95
1177	692.531	192.441
882	305.319	84.9473
1087	784.011	219.346
1129	218.193	63.2851
1330	282.844	82.3505
1556	440.167	128.362
863	807.583	236.058
1559	243.637	71.3994
1221	603.337	178.938
1296	356.168	105.877
841	219.442	65.5747
1202	379.621	113.709
811	295.523	89.8681
1525	439.681	135.981
1439	187.278	57.9283
1570	244.749	76.3315
888	258.476	80.8761
1020	148.501	46.871
1081	118.077	37.7203
1410	181.65	58.663
1124	190.258	61.999
1486	264.857	86.9909
1199	864.259	284.706
1096	524.796	173.884
1138	261.029	88.8858
1190	409.203	140.067
1109	668.337	228.842
782	372.902	128.041
1166	148.281	50.9159
844	222.938	76.9751
884	734.399	254.004
779	144.292	50.134
1088	223.875	78.2082
1288	77.7022	27.2265
1184	616.899	218.985
847	122.738	44.8824
1496	557.128	205.733
833	183.578	68.2786
1046	199.794	74.3177
1492	217.436	80.972
848	300.164	112.508
1558	218.194	82.7439
879	173.99	69.0006
1470	113.393	45.0778
1117	222.702	88.7772
1030	111.741	44.563
1003	132.542	53.3176
1028	642.576	259.826
984	165.118	66.8456
840	151.183	61.5952
1448	275.502	112.706
813	404.873	166.011
1150	162.797	67.3783
1032	202.378	84.5459
820	563.416	235.829
1526	592.727	251.085
785	154.197	67.5798
1033	148.221	64.9613
1210	280.071	123.098
866	63.7951	28.2094
1449	90.4961	40.248
1493	559.925	250.259
1045	175.745	80.0324
1093	266.623	121.576
1053	75.147	34.3258
1145	452.483	207.284
1456	287.583	132.355
1514	41.722	19.259
854	144.483	66.7255
846	249.759	115.428
1351	486.077	225.339
830	164.03	76.5595
855	195.837	91.8146
1121	368.374	175.522
885	182.291	87.8653
1171	178.292	86.2609
1424	440.024	215.145
1108	759.057	375.28
1201	172.28	86.3789
1540	69.834	35.2135
1070	52.5726	27.2719
1542	100.821	52.4298
892	878.038	459.195
1216	291.387	152.718
1455	88.114	46.4235
1375	226.622	121.073
1223	161.906	86.7655
817	511.613	281.864
1360	120.828	66.7039
1017	170.376	94.2087
1650	160.06	88.596
1099	85.7265	48.0822
1004	341.975	192.122
764	177.749	100.526
871	448.926	253.939
875	334.072	192.155
1457	525.4	303.854
1237	239.454	140.261
1140	50.8918	29.8902
901	120.337	70.7252
997	328.424	194.399
1191	427.389	257.823
1388	52.6193	31.8417
1049	88.9051	54.7684
1352	607.939	375.276
1329	130.517	81.2193
1222	477.79	299.352
1189	104.841	66.2184
1149	94.3827	60.0824
1543	67.7436	43.209
1218	191.46	122.285
1331	149.657	95.9651
1319	146.556	95.0408
1212	189.94	124.903
1357	86.6347	57.2702
1490	156.829	104.347
1534	142.286	95.7801
1069	382.22	259.009
1056	312.304	213.409
766	225.235	155.836
1178	293.476	203.204
864	83.8696	59.2849
791	89.0476	63.6477
1110	209.291	150.13
1187	148.48	106.515
902	486.435	349.235
1498	152.012	109.619
1193	137.923	100.314
874	354.371	260.016
810	241.83	179.423
1098	102.811	78.8194
1120	287.393	223.079
1315	1440.76	1122.33
1423	445.191	347.52
1097	166.778	130.574
1122	139.827	109.539
790	211.064	166.558
1156	72.9537	57.7125
1040	135.13	106.966
797	88.1515	71.875
1338	472.463	385.365
1528	156.451	127.68
761	99.8405	81.9168
839	428.179	352.314
780	211.363	175.107
784	119.65	100.155
878	171.7	143.944
1157	167.687	141.798
1111	250.143	212.306
786	93.6097	80.4554
1320	188.473	162.836
1192	105.505	92.7152
787	263.513	235.863
1041	201.456	183.434
1491	708.619	649.34
896	452.366	416.674
1208	162.715	150.16
828	108.478	100.399
1206	173.28	161.728
1133	286.169	268.932
774	283.514	269.058
1167	331.189	317.862
1225	288.284	277.686
1314	80.5597	79.3909
898	664.105	666.232
1644	109.558	112.159
1508	102.746	106.02
883	182.277	188.562
1092	241.568	250.504
1006	368.504	382.644
1265	658.295	684.729
1377	237.888	249.274
789	683.968	718.056
794	153.602	161.727
1086	113.464	122.988
1137	143.494	156.08
857	692.54	758.481
792	53.3373	58.504
799	229.349	254.554
757	163.332	182.748
1518	75.1079	84.568
1411	117.121	133.921
900	208.854	242.588
1073	298.873	349.904
1001	171.203	203.11
906	99.7997	119.479
1409	539.074	648.728
1039	269.54	329.306
1533	774.72	958.096
1022	124.628	158.991
777	143.408	184.795
1380	535.25	693.619
1408	36.301	48.3465
760	102.014	136.405
1479	160.551	216.839
807	254.652	357.913
1238	96.8634	138.441
1044	92.4127	134.249
1127	155.282	228.985
1417	116.762	174.417
769	71.4289	107.861
1116	169.186	255.569
909	329.712	500.532
856	493.056	749.699
917	598.538	919.888
1239	438.173	677.548
1547	66.8593	104.959
1065	110.14	173.272
837	100.551	159.021
1068	55.8688	88.7777
1054	218.607	348.961
876	155.609	250.339
1510	248.991	404.475
1412	270.155	452.871
1027	81.2881	137.411
1135	81.3838	138.19
1220	230.856	392.383
999	285.042	492.229
838	137.612	240.199
1016	162.449	283.629
1019	125.142	220.082
1231	49.7645	89.863
835	72.9521	132.575
893	81.0804	153.186
1406	250.708	484.426
1361	154.746	299.448
1611	123.02	238.2
1000	176.86	347.809
1026	145.75	286.85
1172	56.0719	111.99
1008	135.173	277.237
1174	275.457	565.491
1106	60.8327	125.325
1050	229.239	472.737
1370	174.941	366.545
1101	58.6174	127.505
1015	101.444	222.499
1024	119.945	264.076
834	168.841	377.801
1091	310.835	698.146
795	555.891	1253.93
1051	118.23	268.012
869	201.596	479.496
756	114.282	272.423
1404	158.008	377.987
762	66.6806	160.152
1034	50.3077	121.413
1182	59.5272	143.832
862	139.012	338.061
1489	261.404	641.032
800	250.02	635.064
772	214.396	559.563
1382	378.063	999.876
1371	84.6603	226.118
1505	187.598	503.911
899	308.585	833.721
802	123.282	343.176
804	121.052	357.741
825	300.809	899.047
1362	238.909	749.532
778	151.366	480.417
897	110.788	358.721
1158	187.115	636.16
1389	32.0236	112.336
904	307.376	1135.06
1160	127.552	475.142
1347	90.6426	343.131
1074	85.7745	361.035
861	137.82	595.787
852	351.506	1554.59
1373	282.328	1380.15
889	271.552	1338.42
1090	82.9213	435.601
851	200.366	1137.33
1130	229.916	1562.01
1159	143.667	983.572
819	181.698	1606.44
1023	84.0447	886.774
867	75.8463	823.737
1344	86.643	963.416
1429	52.2903	848.482
