# Supplementary material for: High S100A9+ cell density predicts a poor prognosis in hepatocellular carcinoma patients after curative resection
Source: Aging (Albany NY). 2021 Jun 22;13(12):16367–80. doi: 10.18632/aging.203162 (PMC8266308; doi:10.18632/aging.203162)
Supplement: Supplementary Table 3 [file aging-13-203162-s003.xlsx]

## Sheet: Up-regulation Genes
Supplementary Table 3. Differentially Expressed Genes for S100A9_high vs S100A9_low Group.
ENSG_IDs	TCGA-DD-AAE1-01	TCGA-RC-A7SK-01	TCGA-DD-AAEE-01	TCGA-DD-AADY-01	TCGA-DD-AACV-01	TCGA-CC-A7IF-01	TCGA-G3-A5SI-01	TCGA-ED-A66Y-01	TCGA-DD-AAE9-01	TCGA-RC-A6M4-01	TCGA-DD-AADR-01	TCGA-DD-AADG-01	TCGA-DD-AAD6-01	TCGA-G3-AAV0-01	TCGA-2Y-A9GU-01	TCGA-DD-A39Z-01	TCGA-DD-A3A5-01	TCGA-CC-A9FS-01	TCGA-DD-AACY-01	TCGA-DD-AAEI-01	TCGA-DD-AAEA-01	TCGA-CC-A7IH-01	TCGA-DD-AAEB-01	TCGA-CC-A7IL-01	TCGA-DD-A118-01	TCGA-BC-A3KF-01	TCGA-NI-A8LF-01	TCGA-DD-AACE-01	TCGA-KR-A7K2-01	TCGA-DD-AADF-01	TCGA-G3-AAV4-01	TCGA-DD-A73E-01	TCGA-LG-A9QD-01	TCGA-DD-A73B-01	TCGA-DD-AADW-01	TCGA-DD-A11B-01	TCGA-ED-A8O5-01	TCGA-BC-A5W4-01	TCGA-BC-A10Q-01	TCGA-MI-A75H-01	TCGA-DD-A3A4-01	TCGA-DD-A3A2-01	TCGA-DD-AACW-01	TCGA-XR-A8TF-01	TCGA-DD-A4NF-01	TCGA-2Y-A9H4-01	TCGA-QA-A7B7-01	TCGA-DD-AAVU-01	TCGA-G3-A3CH-01
S100A9	1.38044	1.51797	1.85295	1.94311	2.066	2.0682	2.30679	2.51738	2.57371	2.64538	2.83376	2.94582	2.94926	3.03338	3.0612	3.1424	3.25567	3.28776	3.53083	3.64038	3.78062	3.81195	3.92361	4.02315	4.02408	4.11142	4.11382	4.17696	4.26532	4.52364	4.63375	4.68087	5.03867	5.12949	5.29973	5.33248	5.35157	5.44084	5.64904	5.74832	5.90632	5.98806	6.02424	6.12856	6.19308	6.27512	6.37748	6.38975	6.40704
CHIAP1	0	0	0	0	0	0	0	0	0	0	0	0	0	0	0	0	0	0	0	0	0	0	0	0	0	0	0	0	0	0	0	0	0	0	0	0	0	0	0	0	0	0	0	0	0	0	0	0	0
ENSG00000225269	0	0.0590506	0	0	0.0426964	0.0253284	0	0	0.05006	0	0.0312336	0	0	0	0	0	0	0	0	0	0	0	0.03089	0.020466	0.0207906	0	0.0212543	0	0	0	0	0	0	0	0.0565292	0	0.0599846	0	0.12051	0.0333462	0	0.0612372	0	0	0	0	0	0	0.0282473
DACH1	0.0369508	0.0956052	0.0330659	0.113481	0.442414	0.0984186	0.0588067	0.257817	0.0324197	0.0074537	0.0910231	0.0764628	0.0287071	0.040598	0.0874034	0.0560761	0.0217865	0.0772727	0	0	0.0505989	0.338674	0.050012	0.0927787	0.370269	0.0366842	0.564348	0.0208012	0.244275	0	0.205715	0.158267	0.038535	0.0875559	0.567442	0.0778566	0.174811	0	0.214622	0.0539888	0.028745	0.125584	0.0113161	0.0615173	0.0791753	0.105393	0.0767232	0	0.265254
FGF23	0	0	0	0	0	0.0146448	0	0	0	0	0.0180592	0	0	0	0	0.0200261	0	0	0	0	0	0	0	0	0	0	0	0	0	0	0	0	0	0	0	0	0	0	0.0870983	0	0	0.0118024	0	0	0	0	0.0136998	0	0
KRT1	0.106714	0	0	0	0	0	0	0	0	0	0.0219062	0	0	0	0	0.0242921	0.0235947	0	0	0	0	0.0940471	0.0649955	0	0.0729091	0	0.0298141	0	0.0230043	0	0.0524209	0.0571344	0.10016	0	0	0.112425	0.0841424	0	0.0211305	0.0233879	0	0	0	0	0	0.05707	0	0	0
ENSG00000275358	0.210717	0	0	0	0	0	0	0.300731	0	0	0.086512	0	0.12278	0.347274	0	0.383738	0	0	0.565914	0	0.577095	0	0	0.0566876	0	0.104598	0	0	0	0	0	0	0	0.136173	0.548019	0.665983	0	0	0	0	0	0	0.0967972	0	0	0.112691	0.328144	0.177339	0.156481
LINC00592	0	0	0	0	0	0	0	0.120984	0	0	0	0	0	0	0.0563957	0	0	0.0443191	0	0	0	0	0	0	0.0347506	0	0	0	0	0	0	0	0	0	0.188972	0	0	0	0.553926	0	0	0	0	0	0	0	0	0	0
LHX5	0	0	0	0	0	0.0282868	0	0	0	0.0128538	0	0	0	0	0	0	0	0	0	0	0	0	0	0	0.0116095	0	0	0	0	0	0	0	0	0	0	0	0	0.0200919	0	0.0186205	0	0	0	0	0	0.0227184	0.0132308	0	0
RP11-493L12.6	0.139445	0	0	0	0	0	0	0.398026	0	0	0	0	0	0	0	0	0.123327	0	0	0.105067	0.19095	0.0983148	0	0	0.228653	0	0	0	0.120241	0.10967	0	0	0.0872544	0.180229	0.103617	0	0	0	0	0	0.108478	0.0748312	0.256228	0	0	0	0.52117	0	0
ENSG00000251538	0	0	0	0	0	0.0185941	0	0	0	0	0	0	0	0	0	0	0	0	0	0	0	0	0	0	0	0	0	0	0	0	0	0	0	0	0	0	0	0	0	0	0	0	0	0	0	0	0	0	0
ENSG00000235023	0.1628	0	0	0.107139	0	0.72786	0.0222081	1.48258	0	0.154817	0.152775	0.0180474	0	0	0.0412594	0.105884	0.0411379	0.0324241	0.0178459	0	0	0	0	0	0	0.0577233	0.077972	0	0.220596	0	0	0	0	0	0.328351	0.0163345	0.18338	0	0.294731	0	0	0	0.405978	0.0580793	0	0	0	0	0.103626
ENSG00000255521	0	0.0424396	0.0733905	0	0	0	0	0	0.431737	0.0661746	0	0	0	0	0	0	0.0483556	0.038113	0.0419541	0	0	0.154194	0	0	0	0.0271404	0	0.0461688	0	0	0	0.292732	0	0	0.0406274	0	0	1.3447	0	0.0479317	0.0425334	0	0	0	0.0439328	0.0584803	0	0.0460148	0
ENSG00000231062	0	0	0	0	0	0	0	0	0	0	0	0	0	0	0	0	0	0	0	0	0.304497	0	0	0	0	0	0	0	0	0	0	0	0	0	0	0	0	0	0	0	0	0	0	0	0	0	0	0	0
PRKG2	0	0.0100707	0.00870759	0	0	0.0086392	0	0	0	0	0	0	0	0.0320733	0.0345253	0	0.0114745	0.018088	0.00995548	0	0	0.0548841	0	0.00698068	0	0	0.0217486	0	0.0111874	0	0	0.0138927	0.00811827	0	0.0192814	0.027337	0.01023	0.0122727	0.0102761	0.011374	0	0.00696241	0	0	0.010425	0	0.161635	0	0.0385391
KLK8	0	0	0	0	0	0	0	0	0	0	0	0	0	0	0	0.0324069	0	0	0	0	0	0	0	0	0	0	0	0	0.276199	0	0	0	0	0	0	0	0	0	0	0	0.0553733	0	0	0	0.0285976	0	0	0	0.0264298
ENSG00000227958	0	0	0	0	0	0	0	0	0	0	0	0	0	0	0	0	0	0	0	0	0	0	0	0	0	0	0	0	0	0	0	0	0	0	0	0	0	0	0	0	0	0	0	0	0	0	0	0	0
ENSG00000254768	0	0	0.105149	0	0	0	0	0	0	0	0	0	0.121717	0	0	0	0	0	0.0400726	0	0	0.0368197	0	0	0	0.0777698	0	0	0	0	0	0	0	0	0	0.0366788	0	0	0	0	0	0	0.143939	0	0	0.111715	1.13856	0	0
FANK1	0.0784586	0.0456752	0.0658216	0.0602392	0.220169	0.0391827	0	0.223948	0	0.02374	0.16106	0.0456625	0	0.032326	0.0347974	0.0714406	0.173474	0.0546917	0	0	0.0805784	0.0691457	0.12743	0	0.0428837	0.0389462	0.0548001	0.0331259	0.118393	0.0308527	0.0192706	0.0210033	0.11046	0	0.1749	0.22042	0.0463977	0.0556624	1.24285	0.0171954	0.0457762	0.0210518	0.144166	0.0653107	0.0630431	0.0209796	0.097745	0	0.0291321
MFI2	1.73987	0.761192	0.467083	2.38023	0.497116	6.71951	4.97661	7.96096	0.114489	0.378086	1.66891	0.116602	0.746508	0.247639	0.778668	0.352854	12.6808	3.15334	0.364105	0.86998	0.97466	0.111516	0.0578013	0.472318	1.96246	2.10811	0.278397	0.0400684	1.90259	0.64686	0.450646	0.279457	0.415677	2.95401	11.659	0.32216	2.21369	0.239389	20.0945	0.117862	0.0246089	0.364982	8.8062	1.65238	0.0635464	2.31772	0.778349	2.37611	6.20182
ZNF736P9Y	0	0	0	0	0	0	0	0	0	0	0	0	0	0	0	0	0	0	0	0	0	0	0	0	0	0	0	0	0	0	0	0	0	0	0	0	0	0	0	0	0	0	0	0	0	0	0	0	0
GRIP1	0.020814	0	0.10477	0.0319613	0	0.0415787	0	0	0.0273925	0.0062979	0.0170908	0	0	0	0.0184626	0	0	0.029018	0	0	0	0.0293495	0	0.00559943	0.0910118	0.0258298	0.0116302	0	0.035895	0.00818483	0.0408978	0.0111438	0.0325596	0.00672538	0.0386655	0.0511652	0.0328232	0.00984435	1.23642	0.109481	0	0	0.0764907	0.00866303	0.125434	0	0.0129652	0.0350341	0.0463702
SPINK1	87.5894	3.44638	620.181	720.911	0.453073	0.0298636	41.6693	19.4154	35.5912	3.25687	299.322	0.139209	1.25434	1200.13	2.94386	2578.24	0.832958	15.1625	652.346	0.236543	4.91311	9.73901	3.02294	0.193044	0.637344	13.1126	0.325779	0.757418	1007.72	16.0488	0	4.37017	1200.08	0.666603	6.43182	1.48046	0.247538	330.227	13.7825	0.039317	0.732667	0.842357	2.51346	694.169	0.288294	34.6341	86.8827	3.62348	0.0333051
VSTM2B	0	0	0	0	0	0	0	0	0	0	0	0.0346151	0	0	0	0	0	0.0310949	0	0	0	0.0314501	0	0.0240008	0	0	0	0	0	0	0	0	0	0	0	0.0313298	0	0	0	0	0	0	0	0	0	0	0	0	0
SPATA31D1	0	0.0299661	0	0	0.0433338	0	0	0	0	0	0	0	0	0	0	0	0.0227622	0	0	0	0	0	0	0	0	0	0	0	0	0	0	0	0	0	0	0	0	0	0.0101924	0	0	0	0	0	0	0	0.0881751	0	0
TNNT1	0.0305739	0	0.205196	0.422535	0.0686368	8.2248	0.116779	0.0290896	0	0.0740083	0.451887	0	0.0356293	0.0755813	0.0542397	0.111357	0.297439	2.62142	0.633427	0.0691091	0.0837332	0.0431118	0	0.0987006	0.050133	0.0303533	0.119586	0	0.210906	0.120228	0.12015	0	0.0191309	0.0395158	0.113592	0	0	0.0578418	29.8339	0.0268029	0.0713527	0	0.0842684	0.0763512	0.0245668	0	0.0380895	0.102924	2.83807
AC012363.7	0	0	0.134586	0	0	0.0667646	0	0	0	0	0	0	0	0	0	0	0	0.069893	0.0769369	0	0	0	0.0814244	0.0539474	0	0.0995423	0	0	0	0.0788562	0	0.107364	0.125478	0	0	0	0.158117	0.18969	0	0	0	0	0	0.0834635	0.0805657	0	0	0.253151	0
HOXC13	0	0	0.0183855	0	0	0.0182411	0	0	0	0	0	0	0	0	0.267292	0	0.0484554	0	0	0	0	0	0	0	1.12298	0.0271964	0	0	0.0708642	0.0215447	0	0	0	0	0	0	0.0215999	0	0.0216973	0	0	0	0	0	0	0	0.034128	0	0
VN1R7P	0.0735061	0	0	0	0	0	0	0	0	0	0	0	0	0	0	0.0669311	0	0	0	0	0	0	0	0	0	0	0	0	0	0	0	0	0	0	0	0	0	0	0	0	0	0	0	0	0	0	0	0	0
PHLDA2	23.2837	4.80149	3.68513	1.38746	0.702144	2.03635	1.19463	65.6663	8.32386	2.06098	0.798991	1.07869	13.2833	1.89001	0.86312	34.871	6.14699	5.08719	15.0397	5.13211	1.33245	2.10713	1.35463	5.12325	1.97543	7.31422	3.9613	2.64105	11.5668	7.54344	1.50226	0.446546	7.74124	1.39238	7.02382	0.439339	8.87804	1.70939	51.5817	3.65586	2.32495	0.410279	3.8952	0.63642	2.51314	9.73859	2.42448	3.91911	15.5875
RP11-480O10.2	0	0	0	0	0	0	0	0	0	0	0	0	0	0	0	0.109889	0	0	0	0	0	0	0	0	0	0	0	0	0	0	0	0	0	0	0	0	0	0	0	0	0	0	0	0	0	0	0	0	0
RP11-313E19.1	0	0	0	0	0	0	0	0	0	0	0	0	0	0	0	0	0	0	0	0	0	0	0	0	0	0	0	0	0	0	0	0	0	0	0	0	0	0	0	0	0	0	0	0	0	0	0	0	0
EFS	0.0410108	0.461578	0.247718	0.472311	0.115084	4.9018	0.117483	0.546276	0.107945	0.0868632	0.0841869	0.302329	0.0238959	0.16897	0.254643	0.0746849	2.53893	0.200114	0.25175	0.123601	0	0.419258	0.133217	0.0992952	0.70609	0.23411	1.00828	0.173151	0.990157	6.45077	0.0604371	0.526971	0.384922	0.145764	1.67605	0.216028	0.679066	0	1.20184	0.14381	0.207372	0.165059	0.188391	0.136553	0.214195	0.219324	2.15863	0.0862866	0.593874
CHMP1B2P	0.292032	0.00731218	0	0	0.17976	0	0	0.00896302	0.0247956	0	0.139235	0	0.186626	0	0	0	0.0083315	0.00656673	0	0	0	0	0	0.00506857	0	0	0.00526379	0	0.008123	0	0	0	0	0	0.00699996	0	0	0	0.00746133	0	0	0	0	0	0	0.886682	0.686559	0	0
XCL1	4.41859	5.08809	0.488823	0.0745609	0.163508	0.161661	0.0927314	0.138596	0.575123	0.0293841	0.956885	1.99699	0.226338	0.520149	0.172281	0.309489	0.772982	0.236931	0.335326	0.585363	1.19683	0.102702	0.157726	0.0261252	0.159237	0.674877	1.70928	0.0410014	0.209344	1.83302	0.810971	0.0519936	0.273444	0.156893	0.0721605	0.136412	0.382857	0.872683	0.307667	1.27701	0	0.130284	2.89967	0.121257	0	1.66192	8.52934	2.24755	0.973571
ENSG00000275491	0.393689	0.366702	0.0528446	0	0.530287	0.104859	0.0751861	0	0.103624	0.238244	0.323266	0.1222	0.183514	0.0648822	0.209527	0.215085	0.0696367	0.164659	0.181254	0.0593261	0.539101	0.111027	0.319709	0	0.34429	0.117254	0.175984	0.132975	0.135788	0.619251	0.309426	0.0843123	0.0492682	0.152649	0.292537	0	0.124167	3.57507	0.124727	0.0690263	0.0612521	0	0	0	0.0632675	0	0.196186	0.0662656	0
ENSG00000223608	1.09583	0.850593	0	0	3.69012	0	0	0	0	0	0	2.42959	0	0	0	0	4.84583	0	0	0	0	0	0	0.673834	0	0	0	0	0	0.12312	0	0	0	0	0	0	0	0	0	0	0	0	0	0	0	3.85115	0.585087	0	0
ENSG00000249309	0	0	0	0	0	0	0	0	0	0	0	0	0	0	0	0	0.22535	0	0	0	0	0	0	0	0	0	0	0	0	0.100197	0	0	0	0	0	0	0	0	0	0	0	0	0	0	0	0	0	0	0
MTND4P31	0	0	0	0	0	0	0	0	0	0	0	0	0	0	0	0	0	0	0	0	0	0	0	0	0	0.0245335	0	0	0	0	0	0	0	0	0	0	0	0	0	0	0	0	0	0	0	0	0	0	0
ABHD17AP4	0	0.0566795	0.0490077	0.112128	0	0.0486228	0	0.0694757	0	0	0	0	0	0.0601712	0	0.132979	0	0.152703	0.0560311	0	0	0	0.118598	0	0.0399115	0.036247	0.0408016	0	0.0629644	0.0574288	0	0.0781906	0.137073	0.0471886	0.0542593	0	0	0.138146	0.173507	0.0640144	0.11361	0.0391856	0	0	0	0	0.0454853	0	0
ENSG00000226806	0	0	0	0	0.0400136	0	0.0340397	0	0	0	0	0	0	0.0293747	0	0	0	0	0	0	0	0.0502662	0	0	0	0	0	0	0	0.0280359	0	0	0	0	0.0264886	0	0	0	0	0	0.0277312	0	0	0	0	0	0.0222052	0	0
CTD-2074D8.1	0	0	0	0	0	0	0	0	0	0	0	0	0	0	0	0	0	0	0	0	0	0	0	0	0	0	0	0	0	0	0	0	0	0	0	0	0	0	0	0	0	0	0	0	0	0	0	0	0
ENSG00000225675	0	0.181734	0	0	0	0	0	0	0	0	0	0	0	0.096465	0	0	0	0	0	0	0	0	0	0	0	0	0	0	0	0	0	0	0	0	0	0	0	0	0	0.102626	0	0	0	0	0	0	0.145842	0	0
ENSG00000272461	0.202058	0.0784195	0.406831	0	0	0	0	0	0.13296	0	0.0829568	0	0	0	0	0	0.268054	0	0	0	0	0	0	0	0	0	0	0	0	0	0	0	0	0	0	0.070957	0.23898	0	0	0	0	0	0	0	0.0811788	0	0.251727	0	0.0750251
WFDC6	0	0	0	0	0	0	0	0	0	0	0	0	0	0	0	0	0	0	0	0	0	0	0	0	0	0	0	0	0	0	0	0	0	0	0	0	0	0	0	0	0	0	0	0	0	0	0	0	0
IL12A	0.488059	0.101023	0.152861	0.0499631	0.0365222	0.0649973	0.0310696	0.0928727	0	0.0196902	0.160302	0.075746	0.455007	0.107246	0.0288613	0.0592537	0.230211	0.113405	0.0749004	0.0490313	0.534661	0.321162	0.026423	0.0175065	0.0355682	0.339176	0.25453	0.1099	0.0280562	0.383844	0.0958994	0.104522	0.142515	0.294374	0.26595	0.0228523	0.153931	0	0.0257709	0.0570482	0.0253115	0.0523819	0.508185	0.0270847	0.130722	0.139206	1.17553	0.0547666	0.169138
FGFBP1	0	0	0	0	0	0	0	0.0464705	0	0.029557	0	0	0	0.040247	0.0433239	0.177892	0	0	0	0	0	0.068871	0	0.026279	0	0	0.0272912	0	0.631729	0	0.09597	0	0	0	0	0	0.0385111	0	0.0386847	0	0.0759905	0	0	0	0	0	0.182544	0	0.0362704
ENSG00000232806	0	0	0	0	0	0	0	0	0	0	0	0	0	0	0	0	0	0	0	0	0	0.110895	0	0	0	0.078077	0	0	0.135627	0	0	0	0	0	0	0	0	0.148785	0	0	0	0	0	0	0	0	0	0	0
ENSG00000265737	0	0	0.0760205	0	0	0	0	0	0	0	0	0	0	0.0933373	0	0	0	0	0	0	0	0	0	0	0	0	0	0	0	0	0	0	0	0	0	0	0	0	0	0	0	0.0607844	0	0	0	0	0.564452	0	0
ENSG00000247775	0	0	0	0	0	0	0	0	0	0	0	0	0	0	0	0	0	0	0	0	0	0.0156514	0	0	0	0	0	0	0	0	0	0	0	0	0	0	0	0	0	0	0	0	0	0	0	0	0	0	0.0164855
CD79B	1.88278	1.18896	2.35591	2.0581	0.823856	1.23245	1.09699	2.42898	1.55391	1.13938	1.04813	1.63436	1.11564	2.83997	1.04733	2.09211	3.30208	2.22448	2.22829	1.20221	1.31095	2.36239	3.42076	1.94019	2.25003	1.45734	2.24672	1.07786	2.3114	4.19128	2.69625	3.10954	1.95685	1.60854	4.33936	1.09823	3.90008	0.694282	0.859359	6.68616	1.19159	1.52411	1.93501	1.67352	4.23086	2.90124	4.67132	2.30968	3.22291
VNN2	13.739	25.5162	0.270706	1.00647	3.14094	1.9472	2.11835	3.5978	1.69202	1.06789	3.56037	0.195622	18.2729	0.353143	2.43738	9.54901	0.468203	0.474465	36.5985	4.3117	0.828492	1.6174	0.225193	1.22073	1.8188	3.54137	1.02828	0.617326	15.151	0.515486	0.42104	0.26994	10.9314	9.79095	2.30405	10.3755	2.38526	0.286155	4.5724	0.464099	1.70615	0.365261	32.4019	0.335756	0.648197	0.593198	14.6666	0.912291	4.60528
RFX4	0	0	0	0	0.0109841	0.00651602	0	0.0279316	0	0	0	0	0.0114037	0	0	0	0	0	0.00750881	0.00737313	0	0	0	0	0	0	0	0	0	0	0	0	0	0	0.0872565	0.00687289	0	0	0	0	0	0.00525131	0	0	0	0.0209332	0.0121911	0	0.00726692
BTLA	0.161586	0.0139361	0.0602489	0.0827087	0	0.0119551	0.0171441	0.051247	0.0708857	0	0.235878	0.0417965	0.0418454	0.073973	0.191108	0.0326961	0.0158787	0.100123	0.0413299	0.0811662	0.0983418	0.0253166	0.0145802	0.0289801	0.0294398	0.08021	0.0501605	0.121285	0.154814	0.155324	0.0529172	0	0.146045	0	0.066705	0.176539	0.0424695	0	0.0142203	0.157396	0.0419006	0.0289042	0.0329901	0.149453	0.288528	0.11522	0.111837	0.0151101	0.199993
TSPAN19	0	0	0	0	0.0364775	0	0.0155158	0	0	0	0	0	0	0	0	0	0.0287411	0	0	0	0	0	0	0	0	0	0	0	0.0140109	0	0	0	0	0	0	0	0	0.0153702	0	0	0.0126403	0	0	0	0	0	0.0202429	0	0.0120665
ENSG00000230107	0.116042	0	0.0778812	0	0	0	0	0.110408	0	0.0702238	0	0	0	0	0	0	0	0	0	0	0.158903	0	0	0	0.0634258	0.0576022	0	0	0	0.182527	0	0	0	0.0749903	0.0862268	0.244504	0	0	1.28674	0.101729	0	0	0	0	0	0	0	0	0.086174
ENSG00000267714	0.0948228	0.0736023	0	0	0	0	0	0	0	0.0573829	0	0	0	0	0	0	0	0	0	0	0	0	0	0	0.051828	0	0.105968	0	0	0	0	0.101536	0	0	0.0704596	0	0	0	0	0	0	0	0	0	0.0761921	0	0	0	0.0704165
POTEC	0	0	0	0	0	0.00620935	0	0	0	0	0	0.0217086	0	0	0	0	0	0	0	0	0	0	0	0	0	0	0	0	0	0	0	0	0	0	0	0	0	0	0.0147717	0	0	0	0	0	0	0	0.00580867	0	0
ENSG00000232464	0	0.218312	0	0	0	0	0	0	0	0	0	0	0	0	0	0	0	0	0	0	0	0	0	0	0	0	0	0	0	0	0	0	0	0	0	0	0	0	0	0	0	0	0	0	0	0	0	0	0
LAMA1	0.00418196	0.00649214	0.0112268	0.0449517	0	0.0194926	0	0.592859	0.0220148	0.00253075	0.00686777	0.00324516	0.00487343	0.0241223	0.0037095	0.00761577	0.0184929	0.020406	0.0417162	0.00945286	0.00572659	0.0147423	0	0	0.057144	0.018683	0.0303776	0.00706262	0	0	0.0164344	0	0.020934	0	1.60656	0.0146859	0.00659483	0.051426	0.155677	0	8.3641	0.00224418	0.00384213	0	0	0.00447297	0.00520994	0	0.00621113
DOC2A	0.0309879	0.0721592	0.0346623	0	0.0927548	3.8173	0.0295901	0.0098278	0	0.0250034	0.0508894	0.0400772	0.0962977	0.0340465	0.0732987	0.00940535	0.027406	0.158407	0.0396298	0.0233482	0.183878	0.0436954	0.033553	0.0500185	0.0169372	0.0666558	0.0692599	0.00872221	0.0267202	0.0568658	0.0608885	0	0.0387797	0.0267006	0.0307013	0.0145094	0.0244335	0.0781665	0.711767	0.0362211	0.00803541	0.0221722	0.0569395	0.0859832	0.0829979	0.0220962	0.0450393	0.0347724	0.322167
ENSG00000242104	0	0	0.13693	0	0	0	0	0	0	0	0.558428	0	0	0	0	0	0	0	0	0	0	0	0	0	0	0.0675174	0	0	0	0	0	0	0	0.0439492	0.0505345	0.0477651	0	0.0643312	0	0	0	0	0	0	0.054646	0	0.0423628	0	0
ENSG00000253658	0	0	0	0	0	0	0	0	0	0.0141437	0	0.0181364	0	0	0	0	0	0	0	0	0	0	0	0	0	0	0	0	0	0	0	0	0	0	0	0	0	0	0.0370229	0	0	0	0	0	0	0	0.0145585	0	0
ENSG00000231740	0	0.130435	0	0	0	0	0	0	0	0	0	0	0	0	0	0	0	0	0	0	0	0	0	0	0	0	0	0	0	0	0	0	0	0	0	0	0	0	0	0	0	0	0	0	0	0	0	0	0
ITGB6	0	0.915832	0.0140154	0.0160335	0.0234404	0.125148	0.00997041	0.0397379	0.989389	0.0568683	0.0857363	0	0	0.111852	0.0185236	0.0285223	0.618712	0.0363923	0	1.55771	0	0.0883394	0.0254379	0	0.0114141	0.0570133	0.0933489	0	0.306116	0.00821186	0	0.402503	0.0326672	0.0269904	0.0310346	0.0293338	0.00823291	0.572858	0.190211	0.0732284	0.0893489	0.00560322	0.0575575	0.0173833	0.100679	0.05584	0.0520322	0.0439373	0.348925
ENSG00000251676	0	0.129019	0.594965	0	1.86574	0	0	0.0527157	0.0729172	0	0	0.816893	0.0645669	0	0	0	0.0980029	0	0	0	0	0	0	0.208675	0	0	0	0.0467854	0	0.0871499	0	0	0	0	0	0	0	0	0	0	0	0	0	0	0.0890392	0.355568	0.0690252	0.0466293	0
ENSG00000280148	0	0	0	0	0.049803	0	0	0	0	0	0	0	0	0	0	0	0	0	0	0	0	0.031282	0	0	0	0	0	0	0.0382584	0	0	0	0	0	0.0329691	0	0	0	0	0	0	0	0	0	0	0	0	0	0
ART5	0.117758	0	0.158065	0	0.0881198	0.0522746	0	0.149387	0	0.095016	0	0	0.0914857	0.0970355	0.0696359	0	0	0.027362	0.0301196	0.0591507	0.161252	0	0	0	0.0643635	0.857323	0.21933	0	0.169233	0.030871	0	0.0420315	0	0.507326	0.0291672	0.0827063	0.371401	0.0371302	0.0310896	0.0344111	0	0	4.3636	0.0326746	0	0	0.0733521	0	0.43724
CXCR1	0.0266785	0.0828322	0	0.0409665	0	0.0177645	0	0	0.105331	0	0.0438124	0.0621068	0.0310897	0.131903	0.0236645	0.0728763	0.0235947	0.0743877	0.102356	0.0402025	0.0730647	0.0940471	0.173321	0	0.0729091	0.0397289	0.14907	0.0450554	0.0230043	0	0.0786314	0.0857017	0.0500801	0.103443	0.0594715	0.0749498	0.0631068	0.025236	0.169044	0.163715	0.0830154	0.114533	0.0735316	0.111039	0.0428734	0.313885	0.149564	0.0224525	0.11887
ANKRD1	0.301861	0.338444	3.75923	0	0.225888	0.0446671	0.0960817	0	7.90122	0.852479	1.98291	0.182188	0	0	0	0.24432	0.237307	1.09886	0.180154	0.0252713	0.459285	1.01683	0.354087	0.0360921	0.183323	1.86469	0.50601	29.0299	0.173526	0.105514	0.0988554	0.143659	2.05672	0.0216748	1.59504	0.212011	1.05784	0.0317268	2.62996	0.823292	0.130459	0.215986	0.647108	0	0.431203	4.12553	0.0417849	0.903275	0.0996291
MCOLN2	0.192841	0.0748426	0.0647124	0.0296121	0.0216459	0.077045	0.073657	0.110087	0.0507581	0.0350099	0.158346	0.0598574	0.0449455	0.158907	0.0855275	0.0351184	0.0852756	0.174753	0.221959	0.159829	0.792206	0.108769	0.109623	0.0415028	0.0737818	0.15316	0.0754273	0.113987	0.182911	0.242663	0.0568375	0.0825976	0.374063	0	0.243599	0.148985	0.182463	0.218898	0.213834	0.473357	0	0.0517427	0.159454	0.288946	0.0464856	0.10313	0.21622	0.178524	0.272091
ENSG00000229613	0	0	0	0	0	0	0	0.0535199	0	0	0.0461886	0	0	0	0	0	0	0	0	0	0.0770275	0	0	0.0302654	0	0	0	0	0	0.0442397	0	0	0	0	0	0	0	0	0	0	0	0	0	0	0	0	0.0350391	0	0
RP11-1072C15.7	0	0	0	0	0	0	0	0	0	0	0	0	0	0	0	0	0	0	0	0	0	0	0	0	0	0	0	0	0	0	0	0	0	0	0	0	0	0	0	0	0	0	0	0	0	0	0	0	0
S100A12	0.128139	0	0.0860001	0	0	0	0.122359	0	0	0	0	0.19887	0.149327	0.21118	0	0	0.226655	0.178645	0.294974	0	0.350936	0.27103	1.0406	0.0689444	0.0700378	0.0636071	0.1432	0.324608	0.220983	0.201555	0	0	0.320719	0.0828078	0.0952157	0	0.101036	0.242422	0.304474	0.224668	0	0.343819	0.117726	0.106666	0.205925	0.137056	0	0.215683	0.0951574
ENSG00000253583	0.181852	0.0705776	0	0	0	0	0	0	0.358992	0	0	0	0.317881	0	0	0	0	0	0	0	0.12451	0	0	0	0	0	0	0	0	0.0715107	0	0	0	0	0	0	0	0.17202	0	0	0	0	0	0	0	0.194507	0.113277	0	0
RP11-514O12.4	0.774387	0.171739	0.148493	0.169875	0.124175	0.441981	1.58455	0.105256	0.145591	0.334733	0.181675	0.343382	0.128919	1.45855	0.981286	0.302194	0.195679	0.539807	0.169774	0.333413	0.454462	0.311985	0.628868	0.119044	1.14885	0.109828	0.247258	0	2.00321	0.348019	0.326058	0.118459	0.484552	0.285963	0.0822029	1.16547	0	0.523227	0.876209	0.484909	0.516356	0.356197	0.508185	1.10506	0.622236	0.118325	0.620192	0.186206	0.575068
CALML5	0	0	0	0	0	2.05812	0	0	0	0	0	0	0	0.318368	0	0	0	0	0	0	0	0.217918	0	0	0	0	0.302236	0	0.199888	0	0.151831	0	0	0	0	0.054271	0	0	0.122404	0	0	0	0	0	0	0	0	0	0
OR7E161P	0	0	0	0	0	0.0457065	0	0	0	0	0	0	0	0	0	0	0.0607071	0	0	0	0.0939942	0	0	0	0	0	0	0	0.0591878	0	0	0	0	0.0443583	0.153015	0	0	0	0	0	0	0	0	0	0	0	0	0	0
ENSG00000264595	0	0	0	0	0.12543	0	0	0	0	0	0.0917552	0	0	0	0	0	0	0	0	0	0	0	0	0	0	0	0	0	0	0	0	0	0	0	0	0	0	0	0.088506	0	0	0	0	0	0	0	0.278425	0	0
PTGS2	0.0251949	0.0977826	0.0930022	0.154754	0.0565612	0.0587183	0.0240584	0.0599292	0	0.00762346	0.020688	0.0391021	0.0440413	0.207613	0.089394	0.0114706	0.100272	0.131721	0.34799	0.0284752	0.0862521	0.239807	0.0409208	0.0203339	0.123939	0.0562794	0.239327	0.021275	0.141213	0.00990754	0.0742588	0.161872	0.504482	0.0244227	0.50548	0.309671	0.188726	0	1.66628	0.0441747	0.0587993	0.101403	0.0231475	0.0419456	0.354281	0.0269482	0.0313882	0	0.159035
ENSG00000233236	0	0	0	0	0	0	0	0	0	0	0	0	0	0	0	0	0	0	0	0	0	0	0	0	0	0	0	0	0	0	0	0	0	0	0	0.0539569	0	0	0	0	0	0	0	0	0	0	0	0	0
MMP8	0	0	0.0129575	0	0	0	0	0	0	0	0	0	0	0	0	0.0175796	0	0	0	0	0	0	0	0	0	0	0	0	0	0	0	0.0206734	0	0	0	0	0	0	0	0	0	0	0.0177377	0	0	0.0206501	0	0	0
NPPB	0	0	0.128381	0.146866	0	0	0	0.363997	1.25871	0.173637	0	0	0	0.0788122	0	0.0870876	0	0.133341	0	0.0720633	0	0.404592	0	0	0	0	0	0	0	0	0.18793	0	0	0	0.142137	0	0.301652	0	0.530271	0.41923	0	0	0.175741	0	0.0768508	0	0	0	0
ENSG00000280081	0.0267107	0.124398	0.125487	0	5.30681	0	0	0	0	0	0	1.51309	0	0.0220103	0	0	0.0944929	0	0.266446	0	0	0	0	0.0143715	0	0	0	1.73673	0.023032	0.735251	0	0	0	0	0.0396955	0	0	0.985393	0.126936	0	0	0	0	0.0222345	0	2.48554	7.03799	0	0
ENSG00000229269	0	0	0	0.469699	0	0.203678	0	0	0	0	0	0	0	0	0	0	0	0.213222	0	0	0	0	0	0	0	0.151836	0	0	0	0	0	0	0	0	0	0	0.96473	0	0	0	0	0	0	0	0	0	0	0	0
ENSG00000261573	0	0	0	0	0	0	0	0	0	0	0	0	0	0	0	0	0	0	0	0	0	0.112495	0	0	0	0	0	0	0	0.125488	0	0	0	0	0	0	0	0	0	0	0	0	0	0	0	0	0	0	0
ENSG00000253286	0	0	0	0.108431	0	0	0	0	0.185861	0	0	0	0	0	0	0	0	0.0492225	0	0	0	0	0	0	0	0	0	0	0	0	0	0	0	0	0	0	0	0	0	0	0	0	0	0	0	0	0	0	0
SPI1	8.21279	2.73919	6.24405	3.79323	2.59274	4.99873	3.09404	3.4797	7.89528	2.19381	6.1378	2.91269	5.19662	6.58251	4.06932	2.92116	4.42619	8.07306	4.6772	20.1111	11.9931	3.30231	1.98	2.72725	9.97732	5.50999	4.58903	5.49924	7.52432	3.63326	8.10023	2.19856	5.17909	2.5915	12.1338	2.77144	5.135	2.45808	16.3892	18.7026	1.2728	4.85488	10.5813	3.81883	3.68624	12.0098	5.99509	8.39684	13.794
ENSG00000230010	0.0260502	0	0	0	0.0292407	0	0	0.099142	0	0	0	0	0	0	0.0231072	0.0474402	0	0	0	0	0	0.0183665	0	0	0	0.0258622	0.07278	0.0219972	0	0	0	0.0278945	0	0	0.0967852	0	0	0	0	0	0	0	0.0478667	0	0	0	0.0486807	0	0
ENSG00000259377	0	0	0	0	0	0	0	0	0	0	0	0	0	0	0	0	0	0	0	0	0	0	0	0	0	0	0	0	0	0	0	0	0	0	0	0	0	0	0.0904863	0	0	0	0	0	0	0	0	0	0
ENSG00000269504	0	0	0	0	0	0	0	0	0	0	0	0	0	0	0	0	0	0	0	0	0	0	0	0	0	0.0236359	0	0	0	0	0	0	0	0	0	0	0	0	0	0	0	0	0	0	0	0	0	0	0
CLEC5A	0	0.037434	0.0539453	0.0246851	0	0	0.0460513	0.0611804	0	0.00972826	0.1188	0	0.0187336	0	0	0.0439129	0.0853045	0.0112059	0.0863467	0.629843	0.176105	0	0	0.0259481	0.0263596	0.207474	0.0808424	0.12217	0.0415849	0.012643	0.0157936	0.0172137	0.0201177	0.0727201	0.250849	0.0112906	0.0126754	0.152064	0.865811	0.0986495	0	0	0.0738462	0	0.0387511	0.171942	0.0400544	0.0135292	0.0238758
ENSG00000245857	0	0	0.0310873	0	0	0.215902	0.0442302	0.57292	0	0	0	0	0	0	0.0410866	0	0	0.096865	0	0	0	0.0653145	0	0	0.0759517	0.0229927	0	0	0	0	0	0	0	0	0.413022	0	0.14609	0	0.293497	0	0	0	0	0	0	0.0495429	0.0577057	0	0.13759
NYAP2	0	0	0.027681	0	0	0.00915454	0	0.0130807	0.0180934	0	0	0	0	0	0	0	0.012159	0	0	0	0	0.009693	0	0	0	0	0	0	0	0	0	0	0.00860254	0	0	0	0	0	0	0	0	0	0	0	0.0883753	0	0.00856382	0.0115704	0
ENSG00000273129	0	0.0624505	0	0	0	0.107147	0	0.0765496	0	0	0	0	0	0	0	0	0	0	0	0	0.110173	0.0567246	0	0	0.0879505	0	0.044956	0	0	0	0	0	0.0503431	0	0.0597839	0	0	0	0	0	0.0625886	0.0431754	0	0	0	0	0	0	0.0597473
RP1-144C9.2	0	0	0	0	0	0	0	0	0	0	0	0	0	0	0	0	0	0	0	0	0	0	0	0	0	0	0	0	0	0	0	0	0	0	0	0	0	0	0	0	0	0	0	0	0	0	0	0	0
RP11-317B3.2	0	0	0	0	0	0	0	0	0	0	0	0	0	0	0	0	0	0	0	0	0	0	0	0	0	0	0	0	0	0	0	0	0	0	0	0	0	0	0	0	0	0	0	0	0	0	0	0	0
RBM22P4	0	0	0	0	0	0	0	0	0	0	0	0	0	0	0	0.0974819	0	0	0	0	0	0	0	0	0	0	0	0	0	0	0	0	0	0	0	0	0	0	0	0	0	0	0	0	0	0	0	0	0
ENSG00000255750	0	0	0.0394929	0	0	0	0	0	0	0	0	0	0	0	0.0521961	0	0	0	0	0	0	0	0	0	0	0	0	0	0	0	0	0	0	0	0.26235	0	0	0	0	0	0	0	0	0	0	0	0	0	0
ANXA3	0.0518259	0.512903	0.44348	0.318328	0.770794	0.189803	0.136092	0.172584	1.04014	0.101929	0.606412	0.794275	0.0150988	0.192177	0.160898	0.0825828	0.263554	0.541899	0.15907	0.0488112	0.0709681	0.383664	0.242	0.55072	0.0424902	0.237965	1.24522	0.142228	0.614465	0.132469	0.865584	0.194233	0.308073	0.0586104	1.47301	0.373096	0.020432	0.0612798	52.1313	0.840522	0.826491	0.118199	0.29759	0.301987	0.13534	0.346452	0.71022	0.0436166	0.644648
ENSG00000225605	0	0	0.120726	0	0	0	0.171767	0	0	0.108856	0	0	0	0	0	0	0	0	0	0	0	0	0	0	0	0	0	0	0	0	0	0	0	0	0	0	0	0.170155	0	0	0	0	0	0	0	0	0	0	0
PHACTR3	0	0.0084531	0.00730895	0.0167227	0	0.0145031	0.010399	0.0310845	0	0.0263613	0	0	0.0253818	0.0717909	0	0.00991612	0	0.00759133	0.0250692	0.0082054	0.0149126	0.0153561	0.0353752	0.0234377	0.00595235	0.00540582	0.0243404	0	0.0281713	0.0171297	0	0	0.0340714	0.0211129	0.169935	0.0305948	0	0	0.00862552	0	0.0169436	0	0	0.00906527	0.00875053	0	0.0203508	0	0.0485232
SLA	0.851754	0.276599	0.484154	0.747386	0.556082	0.35303	0.406667	0.686361	0.400343	0.236685	2.54778	0.411411	0.617837	0.429716	0.909716	0.324472	0.599567	1.12083	0.753613	1.70265	1.84475	0.361539	0.472895	0.19173	2.03322	1.25115	0.927581	0.631165	2.33825	0.950136	1.46869	0.558402	1.10943	0.747016	1.97623	1.1232	1.06907	0.271308	2.5264	2.49153	0.270449	0.59234	1.15784	2.22834	0.670435	1.11554	0.95285	0.672947	2.43973
ENSG00000265971	0	0.145131	0	0.287112	0	0	0	0	0	0	0	0	0	0	0	0	0	0	0	0	0	0	0.151839	0	0	0	0	0	0	0	0	0.200212	0	0	0	0	0.294854	0	0	0	0	0	0.171781	0	0	0	0	0	0
ENSG00000250385	0	0	0	0	0	0	0	0	0	0	0	0	0	0	0	0	0	0	0.115231	0	0	0	0	0	0	0	0	0	0.12949	0	0	0	0	0	0	0	0	0	0	0	0	0	0	0	0	0	0	0	0
ENSG00000258100	0	0	0.04983	0	0.166678	0	0	0	0	0	0	0	0.173045	0.0611808	0	0	0.0656641	0	0	0	0	0	0	0	0	0	0	0	0	0	0	0	0	0	0	0.104293	0	0	0.058806	0	0.0577579	0	0	0	0	0	0	0	0.0551359
ADAM3A	0	0	0	0	0	0.0147376	0	0	0	0	0	0	0	0	0	0	0	0	0	0	0	0	0	0	0	0	0	0	0	0	0	0	0	0	0.0164461	0	0	0	0	0	0	0	0	0	0	0	0.0275733	0	0
ENSG00000225439	0.108576	0.168555	0.510092	0.444601	0	0.144596	0.207356	0.516522	0.0952615	0.0219019	0.326897	0.112339	0.126529	0.149116	0.288928	0.197728	0.256069	0.479342	0.222169	0.109077	0.545156	0.229651	0.0587819	0.0973642	0.652795	0.610822	0.202228	0.183366	0.312075	0.170784	0.142228	0.155017	0.0226462	0.163719	2.44726	0.559222	0.399516	0.102705	3.98451	0.190368	0.0844638	0.116531	0.764772	0.180762	0.203567	0.0387105	0.315619	0.304591	0.268765
ENSG00000246465	0	0.041533	0	0	0.510516	0.0712586	0.0255469	0.610916	0	0.0323805	0.461328	0	0.467661	0	0	0.0243607	0.686178	0	0	0.020158	0.0732708	0.037725	0	0	0.0292459	0.106243	0.0298982	0.0225913	0.0230692	0.0420821	0.0525688	0.0286478	0.0167405	0.0172892	0.0795191	0	0.0632849	0.0506145	0.0423801	0.0234539	0	0	0.0245797	0	0.0214972	0.228924	0.0666604	0	0.0794704
HK2P1	0	0	0	0	0	0	0	0	0	0.0146759	0	0	0	0	0	0	0	0.0169051	0	0	0	0	0	0	0	0	0.0135509	0	0	0	0	0	0	0.0156721	0.0180204	0	0	0	0.0960405	0	0.0188658	0	0	0	0	0	0	0	0
DPYSL3	1.60288	1.6541	1.77222	3.15847	2.71439	1.68427	1.22092	3.40274	0.51213	0.588727	1.14878	1.65364	0.658629	0.74821	1.0684	1.0883	1.46677	1.08504	1.01665	0.286221	1.89042	3.27924	2.77641	1.18645	4.27414	1.33836	5.66374	1.90898	2.05322	0.677675	3.7321	3.0954	0.852228	0.898125	9.53526	1.54875	8.89079	0.368099	7.36779	1.77069	0.951409	0.671225	1.37048	1.48081	3.90107	1.82343	0.929191	0.506843	2.4976
ENSG00000237685	0	0	0.0302021	0	0	0	0	0	0	0	0	0	0	0	0	0	0	0.0313689	0	0	0.061622	0	0	0	0	0	0	0	0	0	0	0	0	0	0.0334384	0	0	0	0	0	0	0	0	0	0	0	0	0	0
ENSG00000253376	0	0	0	0	0	0	0	0	1.00794	0	0	0	0	0	0.0754835	0	0	0.0593194	0	0	0	0	0	0	0	0	0	0	0	0	0	0	0	0	0	0	0	0	0	0	0	0	0	0	0	0	0.106016	0	0
EOMES	0.254175	0.0563694	0.219328	0.167272	0.0203789	0.0483568	0.0693456	0.155465	0.0477871	0.0439475	0.581401	0.253592	0.0211573	0.329131	0.209355	0.11572	0.321136	0.594817	0.404003	0.383024	0.919863	0.345608	0.0737185	0.0488419	1.23049	0.261353	0.314483	0.137976	0.172205	0.42836	0.196206	0.0777628	0.488491	0.129059	0.21585	0.318783	0.501034	0.154564	0.143798	0.827635	0.141235	0.477397	0.383641	0.604517	0.175058	0.252444	0.452365	0	0.579742
KIAA1324	0.264077	0.116339	0.0335308	0.0547982	0.472668	0.313664	0.170381	0.400651	0.0563579	0.0388723	4.20783	0.0110768	0.216251	0.04705	0.392514	0.032494	0.0631223	0.0895532	0.104055	0.0268881	0.156374	0.206313	0.0637562	0.0345611	1.82958	0.336571	0.22333	0.0301338	0.504649	2.16108	0.021036	0.18342	0.156307	0.705683	0.20153	0.370945	0.174455	0.0202539	0.633132	0.112624	4.57502	0.0344706	0.367205	0.184176	0.0630838	0.229016	0.128929	0.0420466	0.0689021
POPDC3	0.74104	0	0	0	0.0396094	0	0	0.0671488	0.0928812	0.0213546	0	1.83465	0.0822447	0	0	8.80395	0.124835	0.0245982	0	0	0	0	0	0.0569588	0.0385748	0	0.0591526	0	0.0912833	0	0	0	0	0	0.078663	0	0	0	0	0.0309352	0	0	0.0648402	0.0293742	0	0	2.43988	0.029698	0
A2ML1	0	0	0.00609996	0	0	0.00605205	0	0.0086476	0	0	0.00746304	0.00705289	0	0.0224684	0.0322482	0	0	0	0	0	0	0	0	0	0.0198711	0.00902327	0.0101571	0	0	0	0.00892943	0	0.00568712	0	0.00675362	0.00638351	0	0.0257924	0.0143975	0	0.00707046	0.0048774	0	0.00756577	0.0146062	0.0194427	0.00566153	0	0
ZNF486	0.0778878	0.822218	0.512287	0.334885	3.61948	0.124473	0.104124	5.54316	0.082004	0.0377076	0.332567	0.241761	1.17996	0.0770181	0.165812	0.0709209	0.234209	0.17374	0.0478125	0.223006	0.085325	0.241622	0.0759019	0.041907	0.323545	1.95634	0.269831	0.184155	0.12089	0.220524	0.244869	0.133443	0.126714	0.110734	3.7272	0.164112	0.368481	0.044206	0.308452	0.245812	0.363545	0.0334379	0.128805	0.246375	0.237821	0.233262	3.06627	0.0786603	0.312338
GBP5	1.46723	0.398608	0.53613	0.951281	0.265339	0.38537	0.10897	0.2792	0.557835	0.128253	1.40557	0.360544	0.446458	0.557502	0.961643	0.230087	0.468592	1.47734	0.775586	0.841414	4.39784	0.63217	0.185347	0.232445	0.730671	1.00347	0.54656	1.17012	0.688812	2.263	0.840872	0.0610987	4.3966	0.500426	1.16293	0.543876	1.06691	0.416371	0.664985	4.2804	0.0570699	0.520538	1.1458	1.23493	0.222691	0.645172	1.19829	0.109762	1.31355
MARVELD1	0.923253	6.0228	1.35793	4.40397	0.595337	10.9874	1.06918	8.69084	0.956534	1.2363	1.00005	1.44812	0.343376	1.29495	1.89926	0.608144	2.91868	16.87	3.39146	1.8057	0.753178	2.32673	1.10071	3.63579	4.17661	3.60785	2.46965	1.36017	2.64238	0.602518	1.31234	1.3462	1.41353	1.00286	11.3853	2.30404	2.4782	0.57603	6.6902	2.03206	1.05441	1.22281	2.25593	1.07922	1.6889	2.10107	1.2848	1.32257	3.04881
GPR171	0.998413	0.0861086	0.173725	0.454261	0.124521	0.246229	0.0706205	0.175915	0.0486656	0.0447554	1.03236	0.114779	0.474018	0.0914134	0.360807	0.168353	0.359744	0.592864	1.07823	0.501512	3.29137	0.234641	0.210207	0.0596878	0.181903	0.587382	0.640529	0.405926	1.17977	0.348988	0.326966	0.0395962	1.18005	0.0955865	0.714409	0.363601	0.903863	0.034979	0.439325	1.36153	0	0.0992191	0.951255	1.13892	0.178277	0.395515	0.691022	0.0311208	0.933655
ENSG00000266976	0.0149059	0.104131	0.0600243	0	0.033463	0	0.0142335	0.0283644	0.0392341	0.00902044	1.35859	0.0925349	0	1.216	10.5379	0	0.184561	0.311717	22.6582	0.0224621	0.0204115	0	0.0484195	0	0.073325	0.547538	0.00832892	0	0.0642652	0.140677	0	0	0.0652889	0.00963271	12.4827	0.806118	0	0.0141	0.177092	0	0	0	0.0547785	0.210936	0	0.717444	198.161	0.0250896	0.0221386
ENSG00000274358	0.088738	0.103319	0.208447	0	0.896454	0.118177	0	0.0422149	0	0	0	0.79189	0	0	0	0.0404003	0.156962	0	0	0	0	0.031282	0	0	0.0242511	0.0440488	0	0	0	0.13958	0	0	0	0	0.0329691	0.155811	0.104953	0	0	0.0388965	0	0	0	0	0.0713028	0.14237	1.29898	0	0.164744
LIMD2	3.91681	2.0196	1.65236	10.6113	0.408248	14.9687	1.6697	7.21373	2.08031	0.575643	7.23638	1.32432	2.10291	6.35138	5.23628	3.24803	2.51146	7.33286	2.662	1.47559	8.73487	1.77526	1.79487	0.459116	4.09053	3.13861	1.84466	0.874104	8.09366	3.24549	2.17143	0.973634	3.19485	2.85662	9.55251	2.99657	5.65831	2.11717	2.93609	8.43712	0.348227	2.27455	11.1683	1.86311	1.12401	3.45624	6.13439	5.56853	5.85889
ENSG00000223485	0	0.048882	0.126797	0	0.0706881	0.0419337	0	2.93598	0	0	0.10342	0.0488684	0	0	0	0	0.278481	0	0.0966456	0	0.0862357	0	0.102283	0	0.172104	0.0937813	0.140754	0.106355	0.162907	0.0495283	0	0	0.118216	0.0406968	0.374358	0.0442303	0	0	0.299275	0.0552079	0	0.101384	0.0578579	0	0	0.0673577	0	0	0.0935323
ENSG00000263201	0	0	0	0	0	0	0	0	0	0	0	0	0.0652752	0	0	0	0	0.0390457	0	0	0	0	0	0	0	0	0	0	0	0	0	0	0	0	0	0	0	0	0	0	0	0	0	0	0	0	0	0	0
BEND2	0	0	0	0	0	0	0	0	0	0	0	0.0111079	0	0	0	0	0	0	0	0	0	0.0100923	0	0	0	0	0	0	0	0	0	0	0.00895688	0	0	0	0	0	0	0	0	0	0	0	0	0	0.00891657	0	0
ENSG00000261435	0	0	0	0	0	0	0	0	0	0	0	0	0	0	0	0	0	0.0234156	0	0	0	0	0	0	0	0	0	0	0	0	0	0	0	0	0	0	0	0	0	0	0	0	0.0308614	0	0	0	0	0	0
ENSG00000230138	0.0780894	0.121227	0	0	0	0.0519978	0	0.0742982	0	0	0	0	0	0	0	0	0.138126	0	0	0	0.106932	0.0550563	0.0634153	0	0	0	0	0	0	0.12283	0	0.0836179	0.0977249	0	0.0580255	0	0.123145	0	0.1237	0	0	0	0.0717438	0	0	0	0.0486425	0	0
ENSG00000266411	0	0	0	0	0	0	0	0	0	0	0	0	0	0	0	0	0	0	0.0558468	0	0	0	0	0	0.0795605	0	0	0	0	0	0	0	0	0	0	0	0.0573866	0.0688457	0	0	0.169854	0	0	0	0	0	0	0	0
CTD-2017C7.3	0	0	0	0	0	0	0	0	0	0	0	0	0	0	0	0	0	0	0	0	0	0	0	0	0	0	0	0	0	0	0	0	0	0	0.0676567	0	0	0	0	0	0	0	0	0	0.0731612	0	0	0	0
RP11-278J20.2	0	0	0	0	0	0	0	0	0	0	0	0	0	0	0	0	0	0	0	0	0	0	0	0	0	0	0	0	0	0	0	0	0	0	0	0	0	0	0	0	0	0.0251729	0	0	0	0	0	0	0
STRA6	0	0.36849	0.0289649	0.0397626	0	0.00574748	0.0164842	0.0656993	0	0.0104468	0.0212624	0.0200939	0	0.0284503	0.00765633	0.0078594	0.00763377	0.0180504	0.00662318	0	0.0827369	0.0121711	0	0.0139323	0.0283066	0.00428459	0.0434068	0	0.148855	0.0067884	0	0.0184851	0.00540092	0	0.0962062	0	0.0136116	0.00816479	0.109384	0	0	0	0	0.01437	0.00693556	0.0461606	0.026883	0	0.00640982
CDH11	0.0595256	0.369634	0.322932	0.632221	0.395327	0.290669	0.213152	0.844815	0.0456979	0.198123	0.346216	0.32334	0.0578067	0.0694885	0.325604	0.0406508	0.881806	0.138313	0.727005	0.541942	0.312462	0.290279	0.0241699	0.106758	0.824228	0.647594	0.631957	0.22619	0.585991	0.0468152	0.277787	0.100921	0.22348	0.814228	2.84187	0.292652	0.481085	0.0281536	2.63236	0.208735	0.200661	0.734701	0.0638032	0.301432	0.255094	0.344868	0.35225	0.029223	0.47888
ENSG00000266441	0.135185	0.839456	0	0	0	1.0802	0	0.128622	0.533736	0	0.111003	0.314708	0	0	0	0.861653	0.11956	0.188469	0	0	0	0	0	0	0.0738892	0	0	0	0	0	0	0	0	0	0.200903	0	0	0	0	0	0	0	0	0	0	0	0	0	0.20078
ENSG00000277022	0	0.0287189	0.0248317	0	0	0.0246366	0	0.0352026	0.0486927	0	0	0	0.0862332	0	0	0.0336894	0.163611	0.0515821	0	0	0.0506647	0.0260857	0	0.039814	0.0202227	0.128562	0	0	0	0	0.0363498	0	0	0	0.0274926	0	0	0	0.0293047	0	0	0	0	0.0307987	0	0.0791472	0.0230469	0.0934146	0
CTHRC1	6.27881	1.27644	1.75583	1.7217	0.922926	1.71716	0.963576	3.05811	0.0983725	0.452342	0.552391	1.07307	0.217768	0.585145	0.265212	0.578524	1.68575	0.521049	1.06109	0.647677	0.665316	0.974955	0.424911	0.261414	1.61379	1.57693	4.28107	0.536505	1.74024	0.235148	1.6156	0.400198	1.12252	0.434741	21.7726	0.39374	1.91547	0.318179	13.0839	1.67097	0.407037	0.461291	0.343368	1.30665	1.53156	3.51777	0.861378	0.314538	1.60975
ENSG00000256783	0	0	0	0	0	0	0	0	0	0	0	0	0	0	0	0	0	0	0	0	0	0	0	0	0	0	0	0	0	0	0	0	0	0	0	0	0	0	0	0	0	0	0	0	0	0	0	0	0
FOXD1	0	0	0	0	0.0303113	0	0	0	0.035539	0.0163417	0.0221735	0	0	0.0222521	0	0	0.0238827	0	0	0.0203466	0	0.019039	0	0	0.0147598	0	0.0452669	0	0.27942	0	0	0	0	0	0	0	0.127754	0	0	0	0	0.0144913	0	0	0.0216983	0	0.016821	0	0
ENSG00000260058	0	0.107114	0	0	0	0	0	0	0	0	0	0	0	0	0	0.125652	0	0	0	0	0	0.0972928	0	0	0	0	0	0	0	0	0	0	0	0	0	0	0	0	0	0	0	0	0	0	0	0	0.171917	0	0
SCN2B	0.0113931	0.0265302	0	0	0	0	0	0	0.014994	0	0	0	0	0.0093882	0.0101059	0	0	0.0397092	0	0	0.0624047	0.0240977	0	0.0122599	0	0.0113108	0.0127321	0	0	0	0.0111932	0.0121997	0	0.00736259	0.0761921	0.00800185	0.00898328	0.0107771	0.0180476	0	0.0265889	0.0122278	0	0	0.0366183	0	0.0141937	0.0191768	0
ENSG00000278239	0	0	0	0	0	0	0	0	0	0	0	0.0227405	0	0	0	0	0	0	0	0	0	0.0206613	0	0	0	0	0.0327494	0	0.0252692	0	0	0	0	0	0	0	0	0	0	0	0	0	0	0	0	0	0.0365087	0	0
ENSG00000225208	0	0	0	0	0	0	0	0	0	0	0	0	0	0	0	0.158217	0	0	0	0	0	0	0	0	0	0.258758	0	0	0	0	0	0	0	0	0	0	0	0	0	0	0	0	0	0	0	0	0.108236	0	0
ENSG00000248371	0	0	0	0	0	0	0	0	0	0	0	0	0	0	0	0	0	0	0	0	0	0	0	0	0	0	0	0	0	0	0	0	0	0	0.120591	0.0569912	0	0	0.128539	0	0	0	0	0	0.0652011	0	0.151636	0	0
NUPL1P1	0	0	0	0	0	0	0	0	0	0	0	0	0	0	0	0.0347749	0	0	0	0	0	0	0	0	0	0	0	0	0	0	0	0	0	0	0	0	0	0	0	0	0	0	0	0.031791	0	0	0	0	0
ENSG00000243799	0	0	0	0	0	0	0	0	0	0	0	0	0	0	0.0711937	0	0	0	0	0	0	0	0	0	0	0	0	0	0	0	0	0	0	0	0	0	0	0	0	0	0	0	0	0	0	0	0	0	0
ANO4	0	0.0927946	0.0356598	0.0203972	0	0	0.038052	0.0884679	0	0.00803842	0	0.0103076	0	0.0109457	0.223868	0	0.0939823	0.0185188	0.0203851	0	0	0.00936518	0.0107871	0.00714692	1.39397	0.0263746	0.0371109	0.022433	0.0458152	0.104468	0	0	0.0249348	0.00858404	0.148054	0.0186587	0.052368	0.012565	0.2525	0.0349344	0.0413332	0	0	0	0.138753	0	0.0413709	0	0.0197284
CYP4F27P	0	0	0	0	0	0	0	0.127841	0	0	0	0	0	0	0	0	0	0	0	0	0	0	0	0	0	0	0	0	0	0	0	0	0	0	0	0	0	0	0	0	0	0	0	0	0	0	0	0	0
ENSG00000198211	0	0	0	0	0	0	0	0	0	0	0	0	0	0	0	0	0	0	0	0	0	0	0	0	0	0	0	0	0.0206177	0	0	0	0	0	0	0	0	0	0	0	0	0	0	0	0	0	0	0	0
TREML1	0.22379	0.104224	0.0600783	0.0687287	0	0.0596064	0.0854779	0.0851698	0	0	0.220509	0.0347318	0.0521586	0	0.0794028	0	0.237507	0.0311997	0.103032	0.303511	0.183869	0.0631124	0	0	0	0.111087	0.200074	0.0377943	0.115781	0	0	0.0479267	0.308067	0	0.266065	0.0314355	0.035291	0.084676	0.10635	0	0.0348183	0.0240187	0.0411208	0.111772	0	0.19149	0.278801	0	0.0664754
RAC2	9.59463	3.03188	4.83835	4.75005	1.6184	6.02226	1.20155	2.61892	4.72654	1.44364	9.12682	3.09206	4.03252	5.46525	4.83667	2.98375	7.23363	7.60188	4.68689	8.37483	13.2103	3.41927	3.04428	1.38226	5.37316	5.24417	4.59946	3.25403	10.918	9.73133	6.85082	4.3229	5.11782	2.32091	8.74623	4.27155	7.7306	1.48785	62.3728	20.2927	0.938087	3.74203	10.6695	4.408	2.38025	9.36506	14.2393	4.23598	16.3332
MYH15	0.00862698	0.020089	0	0	0.00968355	0.022978	0	0.00820814	0	0.00522069	0	0.0133889	0	0.00710887	0.252527	0	0.00762981	0.0120273	0.0132395	0.00650012	0.0236268	0	0	0	0.0330072	0	0.0144614	0.00728476	0	0.00678487	0	0.00923775	0.0323887	0	0.0448729	0	0.0136045	0	0.0136659	0.00756292	0.00671115	0	0.0237778	0.00718129	0.00693196	0.230683	0.0268691	0	0.0256259
NRIP3	0.0321979	0.237427	0	0.049442	0	0.0107199	0.0922366	0.0765868	0.0211872	0.00974242	0.0925341	0.037478	0.0750436	0	0.128522	0.0732947	0.113905	0.056111	0.0741192	0.23047	0.0661357	0.079453	0.0392212	0.0519716	0.158388	0.0719225	0.0629689	0.163131	0.0971726	0.0253227	0.142349	0.155148	0.020147	0.0728259	0.167476	0.067842	0.152326	0	0.255021	0.0282266	0	0.00863926	0.0739537	0.0402034	0.0646792	0.120535	0.060169	0.135489	0.0836868
ENSG00000257185	0.466889	0.422804	0.261126	0	0.17469	0	0	0	0.204818	0	0.12779	0.120767	0.634769	0	0	0	0.0688203	0	0	0	0	0	0	0	0.127595	0	0	0	0	0.244796	0	0	0	0	0	0.0546527	0.0613559	0	0	0	0	0	0	0	0.0625258	0.249689	0.533186	0.0654888	0
CST8	0	0	0	0	0	0	0	0	0	0	0	0	0	0	0	0	0	0	0	0	0	0	0	0	0	0	0	0	0	0	0	0	0	0	0	0	0	0	0	0	0	0	0	0	0	0	0	0	0
FOXL1	0	0.151453	0.190478	0.163428	0.0796422	0.188982	0.0677519	1.78895	0	0.0751406	0.0873906	0.110117	0.0206711	0.102317	0.18881	0.11306	0.172566	0.0370945	0.0816658	0.0400951	0.0728694	0.175085	0.0576194	0.00954387	0.785314	0.0968555	0.317167	0.149783	0.305904	0.0837031	0.0522808	0.0759757	0.122091	0.0917038	0.645848	0.0373748	0.237766	0	1.16609	0.0933017	0.0137989	0.0666322	0.0488901	0.0442968	0.0142529	0.0569174	0.0994428	0.0447851	0.289795
M1AP	0.0442507	0.0858694	0.0742467	0.0339749	0	0.0589308	0.0211273	0.0631534	0.145591	0.0535573	0.109005	0.0171691	0.0257837	0.0182319	0	0.0201463	0.0195679	0.0771153	0.118842	0.100024	0.0908924	0.0155993	0.0179677	0.0357132	0.0241864	0.0768798	0.0741774	0	0.152626	0.0348019	0.0869488	0.0236917	0.207665	0	0.0657623	0.0310792	0.0348911	0.0209291	0.157718	0.155171	0.0172119	0.0593661	0.0609822	0.0368352	0.0533345	0.023665	0	0.130344	0.147875
ECM1	0.948228	2.83676	2.93009	4.70188	1.30828	2.36776	1.73546	4.11625	0.33798	0.812924	1.10303	1.28768	0.414381	6.91835	1.71725	0.719509	2.58576	2.87805	1.63711	1.66706	1.48782	3.25913	1.60425	0.924716	9.0699	2.13773	2.74854	1.75153	5.48499	1.36722	1.08686	1.64996	2.10138	1.05959	8.80745	1.51234	1.7134	1.06514	8.65257	1.78377	0.645444	7.8024	0.780427	1.16754	0.777794	1.90165	2.30111	1.28017	5.58931
CD96	0.645098	0.250365	0.278329	0.689876	0.336192	0.168754	0.0659999	2.30167	0.288049	0.0766831	1.4283	0.277113	0.30876	4.11974	0.408727	0.304187	0.896551	0.529983	1.00768	0.746447	1.59322	0.170558	0.271292	0.0557825	0.497412	0.840581	0.476321	0.155637	1.62903	0.452992	0.656417	0.123352	0.533399	0.141443	0.9587	0.574442	0.926472	0.228832	1.16787	1.10077	0.0896139	2.19455	0.984267	0.556172	0.138844	1.23212	2.45407	0.145423	1.53127
ENSG00000224609	0	0	0	0	0.028211	0	0	0.0239127	0.0330764	0	0	0	0	0	0	0	0	0	0	0	0	0.0177197	0	0.0135226	0	0	0	0	0	0	0	0	0.0157263	0	0.093377	0	0.019817	0	0	0	0	0	0	0.0209212	0	0	0	0	0
LY86	1.95846	1.64343	1.38547	1.54431	1.2477	1.72704	1.16251	0.705062	2.71678	1.79379	3.86821	1.23223	2.28229	1.61383	2.77014	1.20492	1.35758	3.65283	2.96495	8.45497	3.91403	2.16449	3.13789	0.626547	4.68684	1.99688	2.3661	1.1174	3.8339	0.624436	4.57625	0.96354	3.51077	0.855152	3.46117	1.52422	1.96158	1.1516	11.6129	5.75395	0.49412	2.24398	3.25822	2.51149	1.4886	4.1895	1.154	3.83104	5.62096
FUT7	0.231186	0	0.0344799	0.157778	0	0.0513136	0	0.342163	0.033806	0	0.0843693	0.0199331	0.0598693	0.169336	0.0683558	0.0701689	0.0454363	0.0537181	0.0394212	0.0580634	0.105525	0	0.0417206	0	0	0.0510038	0.0430596	0.0650723	0.132898	0.181821	0.0252367	0.0275059	0.208951	0	0.057262	0	0.0607623	0.0242985	0.162763	0.247709	0	0.0137847	0.235999	0.0213827	0	0.109899	0.19201	0.0648552	0.228908
ENSG00000272428	0.679038	0	0.113934	0	0	0	0	0	0.223414	0	0	0	0	0	0	0	0	0	0	0	0	0	0	0	0	0	0	0	0	0	0	0	0	0	0	0	0	0	0	0	0	0.728791	0	0	0	0	0.634467	0	0
BMP7	0.012251	0.256752	0	0	0	0.00815765	0	11.0035	0	0.00741381	0	0	0	0.0302855	1.70611	0	0.0108349	0.0085399	0	0	0	0.00863747	0	0.0329579	0.180795	0	0.0136909	0.010345	0.052819	0.0192701	0.0240722	0	0	0.00791702	0.355029	0	1.32339	0.0579432	0	0	0	0	3.84938	0	0	0	0.0992063	0	0.0272932
ENSG00000250320	0.0484496	0	0.0975504	0	0	0.0322614	0	0	0	0	0.0397829	0.0375965	0	0.0399238	0	0	0.0428494	0	0	0	0.0663448	0.102477	0	0	0.105926	0	0.027072	0.0818233	0.0417771	0	0.142799	0.0518797	0.0606322	0	0.144005	0.0340283	0.0764038	0.0458301	0.0383741	0	0.0376902	0	0	0	2.84191	0.0518212	0.120719	0.0407751	0.0719584
PGLYRP4	0.0292148	0	0	0	0	0	0	0.0277964	0	0	0.0959553	0	0	0	0	0.0266016	0	0	0	0	0	0	0	0	0.0159681	0	0	0	0	0.0229766	0	0	0	0	0	0	0	0.0276352	0	0	0	0.0156777	0	0	0	0.156239	0.0181981	0	0
P3H3	0.274102	3.37057	0.910132	1.19625	0.356252	4.47649	0.303065	1.01573	0.151888	0.226987	0.355374	0.716467	0.0840591	1.59296	0.60144	0.512304	1.49279	0.553098	0.808097	0.293485	0.553138	0.41702	0.773222	0.194051	1.5928	0.587215	0.894771	0.633459	2.50036	1.05518	0.453547	0.478881	0.514537	0.307654	3.902	0.790321	1.1375	0.218343	2.43381	0.51853	0.179563	0.534179	0.251828	0.288213	1.50695	0.43205	0.503235	0.230684	1.8641
BLOC1S5-TXNDC5	0	0.0312063	0.0404737	0.0308676	0	0.053541	0.11517	0	0.158731	0	0.0825297	0.140389	0.0468511	0.0993864	0.0178308	0.164733	0.0711129	0.0420374	0.0154247	0.0302919	0.055053	0.0283451	0.179568	0.0324469	0.0219743	0.00997834	0.146018	0.067897	0.0693333	0.0316189	0.21724	0.0215249	0.0754689	0.0389713	0.0597477	0.0141183	0.20605	0.0380298	0.732386	0.088112	0.187652	0.0755111	0.0369365	0.0501994	0.129217	0.0215006	0	0.101506	0.0597111
ENSG00000274536	0.548562	0.0851597	0.0981775	0.280784	0	0.267868	0.104763	0.208772	0.385035	0.177049	0.330319	0.085136	0.170471	0.512301	0.162196	0.233097	0.194062	0.688302	0.0561237	0.110219	0.100157	0.206271	0.0890958	0	0.299831	0.199688	0.204345	0.0617619	0.473013	0.0575238	0.215576	0.1958	0.77803	0.1418	0.108698	0.128426	0.144178	0	0	0.833563	0.0284493	0.255127	0.537584	0.121769	0.705249	0.312926	0.410044	0.184668	0.733262
P2RY12	0.107116	0.0554294	0.0958538	0.219311	0.0400781	0.0475504	0	0.135887	0.0469902	0.0864293	0.175909	0.027707	0	0.0588442	0.126686	0.0325114	0.126312	0.199114	0.246579	0.242123	0	0.0251737	0	0.019211	0.175641	0.0886188	0.0798035	0.0301501	0.123151	0	0.0350789	0.152932	0.0446832	0.0230739	0.132657	0.100309	0.0844592	0.0675495	2.09272	0.281712	0.055552	0.172446	0.164019	0.0594436	0.172139	0.15276	0.266893	0.0901483	0.238636
FPR3	1.86772	1.30105	1.91242	3.67694	1.58579	1.10017	2.49229	1.41252	1.35507	1.04332	2.71333	1.00339	1.08827	0.907648	2.46383	0.305246	0.847095	2.50374	2.97656	12.07	3.31174	1.94147	0.894494	0.876081	9.9337	2.67439	1.2577	2.42636	1.67244	0.847448	7.59861	1.3333	1.13871	1.26888	7.04596	3.11128	2.24677	1.17783	3.4707	5.08	0.763729	1.24643	3.5199	1.57467	4.25214	5.66014	1.10376	1.89431	8.10856
TMPRSS3	0.0469088	0.136541	0.291215	43.273	0	0.054662	0.134379	0.167368	0.108036	0.546455	0.587395	0.0273007	0.327991	0.0483177	0.27046	0.320347	0.0103717	0.0572233	0.0359945	0	0.208764	0.157095	0.019047	0	0.256393	0.215388	0.681488	0.0396106	1.84041	0.0737849	0.0115215	0.0879022	0.344886	0.727538	53.7136	0.0823653	0.0924674	0.0443726	0.157903	0.143931	0.0182458	0.0125865	0.0646455	0.00976198	3.89172	0.0125433	4.30263	0.0098696	0.0609612
ENSG00000226825	0	0	0.0992161	0	0	0	0	0	0	0.089461	0	0	0	0	0	0.53843	0	0.103049	0	0.22277	0.202433	0	0	0	0	0.0733819	0.0826029	0	0.382414	0	0	0	0	0	0.109848	0	0	0	0.117088	0	0	0	0	0	0.118785	0	0	0	0
ENSG00000256633	0.199928	0	0.134181	0.307002	0.224413	0.133127	0	0	0.131558	0	0.246247	0	0.349478	0	0.354682	0	0.176818	0.139365	0.0767052	0	0.684431	0.0704787	0.0811792	0.0537849	0.218552	0.0992424	0.335139	0.0844111	0.51718	0	0.0982103	0.107041	0.250199	0	0.222839	0.140418	0	0.0945591	0.237527	0.438171	0	0.160932	0.0918407	0.41606	0.080323	0	0.249073	0	0.296937
ENSG00000254238	0.337505	0	0.0755051	0	0.12628	0	0	0	0	0	0	0	0	0	0	0	0	0	0	0	0	0	0	0	0	0	0	0	0	0.0884794	0	0	0	0.145405	0	0	0	0	0	0	0	0	0	0	0	0	0.140156	0	0
ADAM8	2.2079	2.05871	1.20224	0.682341	0.124695	1.81231	1.31272	1.13623	1.91888	1.05042	0.786753	1.59479	1.26222	0.663671	1.58894	0.897731	1.12986	1.31644	1.56633	1.18229	3.53682	0.616791	2.40195	0.321269	0.743807	1.13734	1.62166	0.293143	3.81963	0.546055	1.14598	2.91438	1.89419	1.02301	4.7774	0.897265	3.00005	1.44489	4.79532	1.70428	0.464504	0.931477	2.75568	0.924733	1.14926	1.81201	2.1365	1.26215	2.53676
FAM47DP	0	0	0	0	0	0	0	0	0	0	0	0	0	0	0	0	0	0	0	0	0	0	0	0	0	0	0	0	0	0	0	0	0	0	0	0	0	0	0	0	0	0	0	0	0	0	0	0	0
ENSG00000253394	0	0.114154	0.0329011	0	0.165078	0	0	0	0	0	0	0	0.114256	0	0.0434839	0.0446372	0	0	0	0.0369364	0	0	0	0	0.0535888	0	0	0	0	0	0	0	0	0	0	0	0	0	0.0388276	0	0	0.026307	0	0	0	0	0.213754	0	0
ENSG00000225588	0	0	0.0682729	0	0	0	0	0	0	0	0	0.0394692	0	0	0	0.0463132	0	0	0	0	0	0	0	0	0	0	0	0	0	0	0	0	0	0	0	0	0	0	0	0	0	0	0	0	0	0	0.0950485	0	0
LTK	0.456454	0.206677	0.191467	0.408867	0.0640446	1.03847	0.326898	0.307624	0.0750901	0.172642	0.577821	0.162344	0.421109	0.564196	0.506107	0.190495	0.470975	0.994323	0.685907	0.186291	0.364611	0.536365	0.139005	0.030699	0.155929	0.217139	0.350695	0.0481796	1.37757	0.0448735	0.130797	0.101827	0.380819	0.0491627	1.7948	0.12022	0.884773	0.161916	0.316339	0.150058	0.118362	1.11248	2.4987	0.110822	0.0916925	0.305136	0.225093	0.0960377	0.790924
ENSG00000272264	0.345109	0.446461	1.00368	2.82634	0.903877	0.2298	0.219695	0.875611	1.51395	0.974614	0.66121	0.535604	0.670287	0.947932	0.408161	2.19968	0.10174	0.561324	1.14752	0.346703	1.57526	0.89216	0.560516	2.47578	0.377257	0.285515	1.28557	0.291416	0.0991935	0.271418	0.113018	0.615903	0.719811	0.0743405	0.341918	0.646361	1.26987	0.108817	0.182227	0.705934	0	0.555593	0.317065	0.0957588	0.369736	1.10737	0.143314	1.3554	1.02513
CLMP	0.0911579	0.17184	0.166061	0.119982	0.263115	0.164757	0.0373054	0.198245	0.188523	0.157614	0.310099	0.0808432	0.318692	0.0429238	0.0462053	0.15415	0.29945	0.11801	0.0799407	0.166805	0.124828	0.137722	0.222084	0.0560536	0.0284713	0.142214	0.429318	0.241922	0.12352	0.112661	0.2175	0.167334	0.252605	0.0504938	0.174179	0.210365	0.256703	0.0615923	0.247546	0.182662	0.253264	0.174709	0.191429	0.0758818	0.177886	0.195003	0.405593	0.219195	0.367486
TREM1	0	0.023803	0.0102906	0.0235446	0.0172107	0	0.0585649	0.0583538	0	0.0371153	0.0125901	0.0118982	0.0357363	0.0379041	0	0	0.0542423	0.0213764	0.0823575	0.161739	0.230958	0.0108103	0.0124516	0.00824975	0.0502836	0.0228333	0.017135	0.0517893	0.0396636	0.120589	0.0602556	0.0164184	0.0479707	0.0891776	0.159507	0.0430758	0.048359	0.0145039	0.655791	0.0268834	0.0238556	0.0164563	0	0.0638171	0.147843	0.0163999	0	0.0129041	0.0341591
ENSG00000231560	0	0	0.0112609	0	0.0188335	0	0	0	0	0	0.0137772	0	0	0	0	0	0	0.0116959	0	0.0252841	0	0.0118296	0	0	0.0183416	0.0249862	0	0	0	0	0	0	0	0	0.0124676	0	0.039689	0	0	0.0147091	0	0.00900396	0	0	0	0	0.020903	0	0
GLT8D2	0.44643	0.409527	0.966955	0.779003	0.159443	0.743166	0.135638	0.907432	0.293764	0.343841	0.316585	1.19674	0.331066	0.334428	0.467993	0.277157	0.574295	0.551665	1.18338	0.565711	0.52796	0.600889	0.395497	0.141936	0.698751	0.745395	0.4989	0.411243	1.03236	0.127674	0.478471	0.456307	0.67296	0.458974	2.69905	0.59859	1.05601	0.326317	1.30186	0.729366	0.599863	0.217791	0.354223	0.320943	0.717431	0.607723	0.290725	0.170779	0.949363
ENSG00000268108	0	0	0	0	0	0	0	0	0	0	0	0	0	0	0	0	0	0	0.0979466	0	0	0	0	0	0	0	0	0	0	0.10039	0	0	0	0	0	0	0	0	0	0	0	0	0	0	0	0	0	0	0
RPL6P8	0	0	0	0	0	0	0	0	0	0	0	0	0	0	0.0698424	0	0	0	0	0	0	0	0	0	0	0	0	0	0	0	0	0	0	0	0	0	0	0	0	0	0	0	0	0	0	0	0.0490464	0	0
ENSG00000244791	0	0	0.0626555	0	0	0	0	0	0	0	0	0	0	0	0	0	0	0	0	0	0	0	0	0	0	0	0	0	0	0	0	0	0	0	0	0	0	0	0	0	0	0	0	0	0.0375067	0.0998524	0.14538	0	0
FKBP10	2.00386	27.8528	5.00423	6.22568	1.41234	16.7566	2.64029	90.0081	1.30838	1.92709	1.76021	4.01402	75.2875	3.07207	2.50776	2.14994	7.08896	2.76121	3.56395	2.87923	2.78655	5.33362	3.98627	0.944439	8.6008	5.92194	5.56374	3.17431	8.88054	2.23569	3.55589	5.03997	2.89653	2.24862	15.6865	3.2512	14.8203	1.07266	11.9712	5.85568	1.66761	1.62552	10.0186	1.86202	3.38255	2.87436	2.41903	1.5165	6.10232
ENSG00000258426	0	0	0	0	0	0	0	0	0	0	0	0	0	0	0	0	0	0	0	0	0	0	0	0	0	0	0	0	0	0	0	0	0.0927077	0	0	0	0	0	0	0	0	0	0	0	0	0	0	0	0
ENSG00000230061	0.0579197	0.112394	0.116618	0	0.0650133	0.115702	0	0.0551077	0.0381129	0.0175253	0.0713385	0	0.101245	0.0477275	0.102752	0	0.0768373	0.0403745	0.0222217	0.0218202	0.118969	0.0204179	0.0705536	0.046745	0.0633152	0.0431263	0.0647272	0.0489083	0.0749144	0.182209	0.170711	0.124041	0.144967	0.0374297	0.0430381	0.0203398	0	0	0.0458748	0.0507759	0	0	0	0.0241068	0.0465397	0.0929254	0.0721573	0	0.0430118
FABP5	5.6565	1.48835	3.23869	2.45365	4.01762	3.57501	1.55632	5.80756	1.38792	0.792917	10.0765	3.89342	3.389	2.15939	2.26778	4.21937	1.21534	7.03951	1.76559	11.7746	5.73274	2.4334	5.0088	4.1267	2.93451	1.53876	8.80343	3.34621	2.03917	2.2369	7.25271	2.53229	2.27962	2.72608	11.3984	1.93029	7.20667	0.846434	1.11372	5.57517	1.41706	0.908928	8.69077	3.19227	4.49376	5.53741	2.76702	7.45005	4.72268
S100A6	29.3941	42.4483	71.9834	24.5627	7.59631	317.125	20.3005	25.3654	33.5565	11.7898	57.9827	40.3146	101.489	41.6836	25.2244	23.4659	48.0028	32.8316	37.0321	60.0555	94.0751	28.1462	126.902	21.553	32.1323	28.3337	54.7736	30.7663	109.282	36.9882	11.9543	22.2522	58.7708	13.3852	239.751	31.6873	41.0177	22.6319	1191.46	70.1745	13.454	13.4995	38.5614	22.875	24.1131	39.1167	39.8984	129.788	72.0844
ENSG00000233359	2.12161	0	0	0	0.680413	0	0	0	0.13296	0	0.0829568	0	0.470935	0	0	0	1.16157	0	0	0	0.138345	0.142459	0	0.217432	0	0	0	0	0	5.56194	0	0	0	0	0	0	0	0	0	0	0	0	0	1.26148	0	0.216119	7.67767	0	0
C8orf88	3.48957	0.345783	0.04983	0.11401	2.58352	0.0988773	0.283588	0.353207	0.293137	0.179723	1.95088	0.172843	2.16306	0.122362	0	0.0676049	2.23258	0.207021	0.284856	0	0	0.15704	0.0602941	4.79372	0.284068	0.700247	0.290404	0	0	0	0	0.238508	0.18583	0.0479804	0.496527	0.104293	0.468336	0	0.235224	0.325443	1.79049	0.039843	1.43247	0.061804	0.35795	0.397064	0.0924969	0.0624854	0.330816
GS1-531I17.2	0	0	0	0	0	0	0	0	0	0	0	0	0	0	0	0	0	0	0	0	0	0	0	0	0	0	0	0	0	0	0	0	0	0	0	0	0	0	0	0	0	0	0	0	0	0	0	0	0
COL8A2	0.0852796	0.143422	0.0858527	0.24008	0.0478621	0.634106	0.0814328	0.256941	0.0187055	0.0344051	0.0700247	0.0882351	0.0662537	0.16397	0.302581	0.0129419	0.351971	0.108985	0.327188	0.278439	0.428187	0.0901885	0.103882	0.0229421	0.334052	0.0917195	0.730655	0.132021	0.600535	0.033535	0.0139639	0.0608782	0.533615	0.0826659	0.971648	0.249565	0.123277	0.067224	1.60982	0.211823	0.077398	0.0915281	0.274224	0.0709886	0.034262	0.243238	0.12395	0.0837331	0.833839
ENSG00000229162	0	0	0	0	0	0	0	0	0	0	0	0	0.0943307	0	0	0	0	0	0	0	0	0	0	0	0	0.0401811	0.0452301	0	0	0	0	0	0	0	0.0601484	0	0	0.0765698	0.256452	0.0709624	0	0	0	0	0.065042	0	0	0	0.0601116
PSTPIP1	0.757649	0.426656	0.658051	0.342182	0.100052	0.425363	0.0709287	0.296827	0.508331	0.179803	0.841692	0.299729	0.467431	0.734499	0.513923	0.608716	0.722629	0.735253	0.740957	0.895469	2.6039	0.188532	0.603211	0.167855	0.422233	0.678438	0.556164	0.363791	2.12644	0.969748	0.437858	0.0954457	0.957454	0.144006	0.728566	0.406923	0.573969	0.154579	0.870718	1.68004	0.173351	0.526163	1.02365	0.692515	0.214866	1.01694	1.51763	0.500107	1.12528
AC007163.8	0.0980443	0	0	0	0	0	0	0	0	0	0	0.0760816	0	0	0	0	0	0	0.0752323	0	0	0	0	0	0	0	0.0547839	0	0	0	0	0	0	0	0	0.0688608	0.0773066	0	0	0.0859515	0	0	0	0	0.0787806	0	0	0	0
ENSG00000259869	0	0	0	0	0	0	0	0	0	0	0	0	0	0	0	0	0	0	0	0	0	0.0483449	0	0.0368938	0.0374789	0.0340377	0.0383147	0	0	0	0	0	0	0.0443124	0.203809	0	0	0	0.0543105	0	0	0	0	0	0	0.073342	0.0427129	0	0
ODF2L	0.237536	0.307296	0.343369	0.346046	2.15353	0.377173	0.913099	0.359287	0.168329	0.0774021	1.83042	0.311936	0.283909	0.180679	0.313349	0.116463	0.797224	0.297196	0.308454	0.160618	0.608841	0.433711	0.366014	0.0688178	0.266321	0.423269	0.72149	0.282868	0.630222	0.162864	0.430835	0.150003	1.07091	0.149568	0.71507	0.256664	0.624312	0.33992	2.03093	0.405797	0.530665	0.173228	0.268595	0.648959	0.494291	0.586305	1.70347	0.0666365	0.610603
LPAR2	2.11601	0.656987	0.358776	9.71363	4.77534	4.21217	0.510458	4.15372	0.469019	0.269584	1.5546	0.155559	4.9837	0.60569	0.454421	0.304222	0.433383	2.04951	0.871659	0.604171	1.58604	0.424007	0.633089	1.21041	0.328708	0.696562	0.597402	0.263317	2.7657	0.508014	0.656493	0.262358	1.36585	0.359853	22.3106	1.37666	0.930818	1.17989	30.5556	0.878695	0.242583	0.131482	1.06412	0.482071	0.501129	1.0006	2.15055	0.881044	2.1503
TFEC	0.184292	0.0774851	0.133995	0.235828	0.0948123	0.0869237	0.0659923	0.131509	0.101058	0.06041	0.334178	0.0774635	0.12528	0.075931	0.265642	0	0.101869	0.299754	0.182658	0.601717	0.483694	0.0974504	0.0685947	0.0537102	0.289599	0.217268	0.111558	0.116715	0.178775	0.0483136	0.467737	0.123337	0.0960969	0.0843597	0.325236	0.177975	0.175585	0.0435821	0.425738	0.471222	0.0298679	0.201916	0.317469	0.332386	0.234464	0.238183	0.143496	0.1551	0.456192
MS4A4E	0.0426033	0.0992073	0.114372	0.13084	0	0.056737	0.0406816	0.16214	0.504617	0.103127	0.104947	0.0661197	0.0992954	0.245744	0.151161	0.0387925	0.0753578	0.296978	0.228835	0.224701	0.116678	0.120148	0	0.0687673	0.186288	0.148036	0.166637	0.0359749	0.18368	0.0335063	0	0.136859	0.559817	0.0550635	0.189942	0.299222	0.0335922	0.0402999	0.134974	0.149394	0.0331422	0.274349	0.391413	0.390103	0.136931	0.136704	0.13269	0.358549	0.348015
DPRXP6	0	0	0	0	0.131171	0	0	0	0	0	0	0	0.136182	0	0	0	0.103352	0	0	0	0	0	0	0	0	0	0	0	0	0.183813	0	0	0	0	0	0	0	0.221082	0	0	0	0	0.107363	0	0	0.249982	0.218377	0	0
GAD1	0.00805338	0	0.016215	0	0.0361588	0.0107251	0.0153802	0.0153248	0.127185	0.901611	0.158707	0	0.065695	0.0132724	0	0	0.00712251	1.10592	0.197747	0	0	0.0624577	0	0.00433307	0.022009	0.0119929	0.0134999	0	0.354158	0.0190013	0.11077	0.0344942	0.136058	0.00520437	0.0837787	0	0.0253999	0.0304718	0.752677	0.00706007	0	0.00864345	0.0147979	0.174299	0.867122	0.0516829	0.105347	0.0745549	0.0119611
ENSG00000258859	0	0	0	0	0	0	0	0	0	0	0	0	0	0	0	0	0	0	0	0	0	0	0	0	0	0	0	0	0	0.0959611	0	0	0	0	0	0	0	0	0	0	0	0	0	0	0	0	0	0	0
HOXA1	0.287568	0.0811684	0.0877275	0.361293	0.0293443	0	0.0249633	0.0746201	0.103216	0.0632816	0.0643985	0.0202864	0	0.0215422	0.115946	0.0714125	0.0693624	0.10934	0.0401199	0.07879	0.071597	0.0737264	0.04246	0	0.0714446	0.0389309	0.0584304	0	0.0676266	0	0.179788	0.0279934	0.0654322	0.0844711	0.427364	0.128528	0.103065	0.173104	0.144942	0.160427	0.0813479	0.0701451	0.0960728	0.108808	0.0630183	0	0.0651376	0.0220015	0.116483
ENSG00000259278	0.115638	0	0.0776098	0	0	0.0770002	0	0	0	0	0	0	0	0	0.102573	0	0	0.0806083	0	0	0	0	0	0	0	0	0	0	0.0997119	0	0	0	0	0.074729	0.0859263	0	0	0	0.0915898	0	0	0.0620552	0	0	0	0	0.0720316	0	0
TAAR3	0.985172	0.38235	0.123974	0.0945498	5.46003	0	1.3523	0	0.0810341	0.372616	0.455031	0	0.430526	0.355167	0	0	2.66835	0.0429213	0.141741	0.0927865	0	0	0	0	0.0336545	0.978063	1.16977	0	0.63712	0.242128	0	0	0.154112	0.875397	0.137259	0.216228	0	0.640686	0	0.161936	0.0478994	0	0.169709	0	0.0494754	0.987871	1.34241	0.05182	0.3658
MYOC	0	0	0	0.0486514	0	0	0	0.120579	0.416968	0	0	0	0	0	0	0	0	0	0	0	0	0.0223379	0	0	0	0	0.0708137	0	0.0546393	0.0249178	0	0.0678523	0.0198249	0.061424	0	0.0222524	0	0	0	0	0	0	0	0.0527473	0.050916	0	0	0	0
CTD-2375G15.1	0	0.0592203	0.102409	0	0	0	0	0	0	0	0	0	0	0	0	0	0	0.0531829	0	0	0	0	0	0	0	0	0	0	0.0657869	0	0	0	0	0	0	0	0	0	0	0	0	0	0	0	0	0	0	0.0642091	0
CTD-2542C24.9	0	0	0	0	0	0	0	0	0	0	0	0	0	0	0	0	0	0	0	0	0	0	0	0	0	0	0	0	0	0	0	0	0	0	0	0	0	0	0	0.458182	0	0	0	0	0	0	0	0	0
COTL1	6.83196	4.00013	5.54709	5.60722	2.1155	2.84327	2.37143	2.77382	3.15211	1.92464	7.39114	2.98593	2.88265	6.30108	6.33874	2.59202	9.38461	8.27261	3.66061	10.1104	10.2829	5.76495	4.50387	1.30452	8.40729	7.73281	3.68583	3.81285	8.52341	4.94082	6.24921	1.87095	4.98127	2.98777	9.96354	4.51572	7.51535	2.03348	30.3758	17.3483	1.2676	4.91996	9.821	6.71662	4.29074	10.2051	7.34349	4.97322	11.5684
AC007050.18	0	0.0458786	0	0	0	0	0	0	0.077787	0	0	0	0	0	0.0524285	0	0.052274	0	0	0	0	0.0416721	0	0	0	0	0	0	0	0	0	0	0	0.0381963	0	0	0	0	0	0	0	0.0317183	0	0	0	0	0	0	0
ENSG00000249175	0	0	0	0	0	0.0227825	0	0	0	0	0	0	0	0	0	0	0	0	0	0.0257793	0	0	0	0	0	0	0	0	0	0	0.0336142	0	0	0.0221105	0.0508471	0	0	0	0	0.0299944	0	0	0	0	0	0	0	0	0
PRRX2	0	0	0	0	0	2.62964	0	0.048172	0	0	0.0415733	0.0392885	0	0.0417206	0.17964	0.0922026	0	2.78815	0	0	0.207992	0.142785	0	0.0544823	1.35599	0.0251323	0.0848711	0.0855056	0.305601	0.199095	0	0.0542145	0.0633609	0	0.112864	0	0.0798422	0	0.561416	0.0887706	0	0	0	0.0842911	0.0406823	0	0.252303	0.213051	0.0375984
LRCH2	0.0673321	0.177697	0.108455	0.372214	0.181388	0.152438	0.115731	0.217815	0.194949	0.0488959	0.0995178	0.229896	0.925891	0.0554835	0.179176	0.0245238	0.119099	0.0657099	0.0723323	0.111611	0.0184403	0.788034	0.153102	0.0434731	0.213453	0.200539	0.346131	0.159198	0.232236	0.10591	0.158762	1.3843	0.0674101	0.113132	0.370238	0.132413	0.392869	0	0.117326	0.153471	0.167614	0.0361327	0.0371164	0.112097	0.465284	0.0720177	0.0671067	0.0226666	0.280009
ENTPD3	0.0394508	0.122488	0.0529546	0.0302897	0.0664237	0.0656733	0	2.909	0	0.035811	0	0.0306135	0.0459739	0.0162543	0.174969	0.017961	0	0.0275002	0.25731	0	0	0.0695361	0	0.0318394	0.269536	0.0195831	0.132263	0.0666258	0.0340176	0	0.0387588	0.0844877	0.037028	0.0254945	5.58442	0.0554161	0.0933193	0	0	0	0.0153449	0	0	0.0164199	0.0316995	0.0210981	0.0737227	0	0.0292966
APOBEC2	0.346009	0.268575	0.348334	0.177106	0.323655	0.153599	0	0.219473	0.379473	0.174492	0.331467	0.04475	0	0	0.204612	0.0525098	0.102005	0.0401991	0.0885008	0.0434509	0	0.406584	0.140494	0.15514	0.0315201	0.257634	0.064446	0.146088	0.397808	0.0453543	0.169969	0.67926	0.108253	0.111801	0.299958	0.202514	0.454705	0.1091	0.228378	0.353887	0.0897229	0.0618934	0.211928	0	0.231688	0	0.143688	0.339734	0
MPO	0	0.0292238	0.176878	0	0.0211303	0.0376048	0	0.0358216	1.70944	0	0	0.102255	0.0219374	0.0155121	0.200376	0.0171409	0	0.0131223	0.0144448	0	0	0.0530889	0.0152873	0	0.0823133	0.0467222	0.284003	0.0158959	0	0.0296102	0	0.100787	0.106012	0.0486607	0.055952	0.0264429	0.014843	0	0.01491	0.0825144	0.0146442	0	0.24213	0.0313402	0.0302521	0	0.0586303	0.0158429	0.0279589
ENSG00000225746	0.689101	0	0	0	0	0.0148018	0	0.0211498	0	0.0134521	0	0	0	0	0	0	0	0	0	0	0	0	0.0361038	0	0	0.0110343	0.0248417	0	0.0191677	0	0	0	0.0139093	0.0143652	0.0165177	0	0	0.0420544	0	0.0194873	0	0	0.22465	0.0740158	0	0	0.0138467	0.0187079	0.0495226
PTX3	0.786932	0.0796726	0.229629	0.420308	0.230429	0.136695	0.163355	0.0651066	0.360226	0.165641	0.112376	0.212401	0	0.281936	0.151745	0.062308	0.332856	0.143101	0.105015	0.283573	0.0468518	0.0482452	0.138925	0	0.0935041	0.356659	0.401475	0.664498	0.206517	0.107635	0.134457	0.146547	1.7127	0.221105	22.0422	1.15345	1.3219	0.161823	0.37939	0.0299944	0.133081	0.110164	0.282907	0.227847	0.54984	0.109786	0.575436	0.0287948	1.01632
TRPV5	0	0	0	0.414778	0	0.0119908	0	0.0342667	0	0	0	0	0	0	0	0	0	0.0125527	0	0.0135681	0	0	0	0	0	0	0	0.0152059	0	0	0	0	0	0.0116371	0.0535233	0	0	0.272544	0.114102	0	0	0	0.0165443	0	0	0	0.0112171	0	0.0267453
OBP2A	0	0	0	0.299192	0	0	0	0.123588	0	0	0	0	0	0	0	0	0	0	0.0498358	0.0489354	0	0	0.0527426	0	0	0	0	0	0.22401	0	0	0	0	0	0	0	0	0	0.0514409	0	0	0	0	0	0	0.138934	0	0	0
TNFSF12-TNFSF13	0	0	0	0	0	0	0	0	0	0	0	0	0	0	0	0	0	0	0.0280464	0	0.0500509	0.0257697	0	0.0196658	0	0	0.0204233	0	0	0	0	0	0	0	0.0271595	0.0513423	0.0288197	0	0.0868489	0	0	0	0	0	0	0	0.0455354	0	0
TRIM46	0.0732142	0.0568295	0.058965	0.404731	0.0328724	0.32176	0.0699116	1.33747	0.0385417	0.0265837	0.144282	0.0795391	0.119448	0.120661	0.0259771	0.17333	0.142453	0.102072	0.179774	0.0661971	0.16041	0.113562	0.0475649	0.0315139	0.0880378	0.0799544	0.147275	0.0247293	0.340908	0.0575809	0.0719299	0.0156795	0.073299	0.0851643	0.522268	0.0514216	0.242459	0.0138511	0.46391	0.0641839	0.0455641	0.0392893	0.336324	0.0487561	0.0352975	0.125295	0.155059	0.0492936	0.0978654
CTD-2571E19.3	0	0	0	0	0	0	0	0	0	0	0	0	0	0	0	0	0	0	0	0	0	0	0	0	0	0	0	0	0.0392287	0	0	0	0	0.0293999	0	0	0	0	0	0	0	0	0	0	0	0	0.0566773	0	0
ENSG00000231460	0	0	0	0	0	0	0	0	0	0	0	0	0	0	0	0	0	0	0	0	0	0	0	0	0	0	0	0	0	0	0	0	0	0	0	0	0	0	0	0	0	0	0	0	0	0	0	0	0
RP11-679I18.4	0	0	0	0	0	0	0	0	0	0	0	0	0	0	0	0	0	0	0	0	0	0	0	0	0	0	0	0	0	0	0	0	0	0	0	0	0	0	0	0	0	0	0	0	0	0	0	0	0
TNFRSF17	0.0593703	0.0921675	0	0	0	0	0	0.112976	0	0	0.2925	0.230354	0	0.146768	0.0526629	0	0	0	0.0455566	0	0.0812991	0.167434	0.144641	0	0	0.0294709	0.0995224	0.401066	0.204775	2.14788	0	0.127147	0.0742989	0.0383671	0.308812	0	0.0468127	0	0	0.312285	0	0.0955805	0	0.0494211	0.0477053	0.127004	0.0369822	0	0.352712
PROCR	2.11734	3.82208	5.81636	7.18312	2.37665	7.18056	2.86817	6.88691	1.62008	1.6985	3.76019	4.39417	10.9026	5.23423	3.1011	3.58687	8.01297	4.01594	4.11841	6.41845	3.10167	3.47165	2.79912	1.56311	10.5232	3.7397	25.0101	4.53215	9.46834	2.78828	2.56396	3.74358	4.12866	1.55922	17.2333	3.49295	9.86164	0.698671	5.46006	5.09371	2.68137	1.16266	1.58337	3.23811	3.40264	4.47669	2.08571	1.65762	10.6043
TMEM63C	0	0.19433	0.154024	0.0640734	0.0585457	0.152815	0.049805	0.0496255	0	0.0126255	0.00856555	0.501878	0.0364692	0.0171918	3.77524	0.0569908	0.0276774	0.0509012	0.0240133	0	0.0999917	0.0147094	0	0.0224505	0.114033	0.0466032	0.0932609	0	0.0269847	0	0.28696	0.0223402	2.14747	0	0.139524	0.00732654	0.0246754	0.0197351	0.0495734	0.0365797	0	0.0559794	0.0191678	0.0173669	0	0	0.0259916	0.00877918	0
BNIP3P36	0	0	0	0	0	0	0	0	0	0	0	0	0	0	0	0	0	0	0	0	0	0	0	0	0	0	0	0	0	0	0	0	0	0	0	0	0	0	0	0	0	0	0	0	0	0	0.216095	0	0
ENSG00000255733	0.0624715	0	0.0209638	0.0959291	0	0	0	0	0	0.0378052	0.128241	0	0	0	0.0277069	0	0	0	0	0.023535	0.0427729	0	0	0	0	0.0310103	0.0174535	0	0.0538679	0.221094	0.0920634	0	0.019545	0	0.0232102	0	0.024629	0	0.02474	0.0821494	0	0.0335244	0.0286975	0	0.150591	0	0.019457	0.026288	0.046392
ENSG00000233208	0	0	0	0	0	0.0213724	0	0.0305384	0.0422412	0	0	0.0249068	0	0	0	0	0	0.0223739	0	0	0	0.0226295	0	0	0.0175433	0	0.0179346	0	0	0.0252431	0	0	0	0	0	0	0.0506156	0	0	0	0	0	0	0	0.0257904	0.0343303	0.0199933	0	0
ANKRD18B	0.215322	0.00879659	0.00760595	0	0	0.0150924	0	0.150956	0	0.0274325	0.0186111	0	0.224512	0	0.0100524	0	0.0400913	0.0947977	0.00869596	0	0.0620744	0.00799007	0	0.012195	0	0.022502	0.00633237	0	0.009772	0	0	0	0	0.476035	0.143157	0.143271	0	0	0.987362	0	0.255665	0.0425709	0	0.0188673	0.00910611	0	0.211778	0.0763011	0.00841583
ENSG00000267593	0	0	0.0931967	0	0	0	0	0	0	0	0	0	0	0	0	0	0	0	0	0	0	0	0	0	0	0	0	0	0	0	0	0	0	0.0897373	0	0	0	0	0	0	0	0	0	0	0	0	0	0	0
ENSG00000226751	0.095505	0	0.0640979	0	0.107202	0.127189	0	0.272605	0.12569	0.0577957	0.078421	0.0741112	0.111297	0	0.169431	0	0.168932	0.0665743	0.146568	0.215879	0.13078	0.067335	0	0	0.156603	0.0474079	0.10673	0	0.164704	0.150224	0.187659	0.102267	0.11952	0	0.354832	0.0670774	0	0	0.302576	0.251176	0	0.0512513	0.175488	0.0795005	0.15348	0	0.0594908	0	0.496461
ENSG00000264174	0	0	0	0	0	0	0	0	0	0	0	0	0	0	0	0	0	0	0	0	0	0	0	0	0	0	0	0	0	0	0	0	0	0	0	0	0	0	0	0	0	0	0	0	0	0	0	0	0
LCE3A	0	0	0	0	0	0	0	0	0	0	0	0	0	0	0	0	0	0	0	0	0	0	0	0	0	0	0.137365	0	0	0	0	0	0	0	0	0	0	0	0	0	0	0	0	0	0	0.525889	0.306268	0	0
ENSG00000267112	0	0.0908671	0	0	0	0	0	0	0	0	0	0	0	0	0	0	0	0	0.0898276	0	0	0	0	0	0	0.174331	0	0	0	0	0	0	0	0	0.0869871	0	0	0	0	0	0	0	0	0	0	0	0	0	0
CRPP1	0	0	0	0	0	0.212151	0	0	0	0	0	0	0	0	0	0.193404	0	0	1.62983	0.0800191	0	0.0748765	0.0862447	0	0.0580473	0	0	0	0	0.0835245	0	0	2.72457	1.50988	0.0789147	0	0	0	0.0841161	0	0.165234	0	0	0	0	0	0.264615	0.0893791	0.0788664
ENSG00000226004	0.115839	0	0	0	0	0	0	0	0	0	0.095118	0	0	0	0	0	0	0	0	0	0.158626	0	0	0	0	0	0	0	0	0.0911044	0.113807	0	0	0	0	0	0	0.109576	0	0.101552	0	0	0	0	0	0	0.0721573	0	0.0860236
ENSG00000261795	0.103454	0.0160604	0	0.031772	0	0	0	0.236235	0.0272303	0.0751272	0.0339792	0	0	0	0.0550597	0.01884	0	0.288461	0.0317533	0.187077	0.169998	0	0	0	0.0452364	0.0513536	0.0924905	0.0698865	0.0178412	0.0162727	0	0.0221556	0.0129467	0	0.0614984	0.0435961	0.0489432	0	0.0655518	0.0181388	0.0160959	0.0111034	0.0570283	0.0516703	0.0332509	0.0442612	0.0257769	0.0348266	0.107556
GRID2	0	0.0137245	0	0	0	0.00588681	0	0	0	0	0	0.0137206	0	0.00728498	0	0	0	0	0	0	0	0.0186992	0	0.00951337	0.00966425	0	0	0.00746523	0	0	0	0.047333	0	0	0	0	0	0	0	0	0	0	0	0	0	0	0.0550694	0	0
FIBIN	0.342497	0.983643	0.528692	0.841484	1.07644	1.18591	0.261638	1.59676	0.585971	1.84466	0.196862	0.21262	0	1.07246	0.0911411	0	0.424072	0.787865	0.420493	0.025806	0.703502	0.603687	0.139069	0.0184279	0.711364	2.46519	0.554991	0.173526	0.945051	0.0269364	0	1.68703	0.96439	2.324	3.69022	2.21307	0.162033	1.45791	2.76698	0.210177	0.0532875	1.02926	2.13973	0.0285102	0.0275204	4.54251	3.45618	0.0288245	3.7134
NAP1L6	0	1.48717	0.305124	0	1.89544	0	0	0	0	0	0.106659	0	0	0	0	0.0295689	0.51696	0	0	0	0	0.0228952	0	0	0.0177493	0.0161196	0	0	0	1.20036	0	0.104318	0	0	0.07239	0.0912305	0	0	0.0257204	0	0	0	0	0	0.0260932	0.347334	8.77897	0	0
ENSG00000259954	0	0	0	0	0	0.0169018	0	0	0	0	0	0	0	0	0.0450303	0.0924494	0	0.0353875	0	0	0.0347581	0.0357918	0	0	0	0.0125998	0.0283661	0.0214336	0	0.0399257	0	0	0	0	0.0188611	0	0.020014	0	0	0	0	0.0136213	0.0233202	0	0.0611868	0.0271492	0.0316223	0	0
ENSG00000249896	0	0	0	0	0	0	0	0	0	0	0	0	0	0	0.0693488	0	0	0.254326	0	0	0	0	0	0	0.0284881	0.0129362	0	0.0220059	0.0224714	0	0	0	0	0	0	0	0	0	0	0.0456923	0	0	0.0239428	0.0216933	0	0	0.0162333	0	0.116117
AC012363.10	0	0	0	0	0	0	0	0	0	0	0	0	0	0	0	0	0	0	0	0	0	0	0	0	0	0	0	0	0	0	0	0	0	0	0	0	0	0	0	0	0	0	0	0	0	0	0	0	0
RBM43P1	0	0.0476611	0	0	0	0	0	0	0	0	0	0	0	0	0	0	0	0	0	0	0	0.0432912	0	0	0	0	0	0	0	0	0	0	0	0	0	0	0	0	0	0	0	0	0	0	0	0	0	0	0
CCL28	0.498847	12.8804	2.14666	1.2842	1.41632	0.625261	0.0560406	0.0837579	1.21648	0.754704	4.04794	1.99243	0.205175	1.19692	0.0520576	0.0400788	3.28294	2.9762	0.19139	0.0663288	3.4155	0.113788	1.2034	1.31832	0.240581	1.69695	2.80379	0.644241	1.13862	0.553876	4.59825	2.21521	0.293779	1.9532	4.77518	9.75862	0.0231373	1.59605	0.85994	0.16721	0.21686	0.110229	1.44233	0.317545	0.341888	0	1.68163	1.66697	2.26628
ENSG00000253825	0	0	0	0	0.157184	0	0	0	0	0	0	0	0	0	0	0	0	0	0	0.10551	0	0	0	0	0	0	0	0	0	0	0	0	0	0	0	0	0	0	0	0	0	0	0	0	0	0	0.0872281	0	0
ENSG00000259182	0.0871076	0.0676137	0.175386	0	0.097776	0.116006	0.166357	0.414393	0.229278	0	0.0715257	0.13519	0	0.0717791	0.0772666	0	0	0.182162	0.267361	0	0.119281	0.245658	0.0707388	0	0.095222	0.086479	0.0486728	0.0735551	0	0.0685076	0.0855795	0.0932746	0.218021	0	0.19418	0.0611795	0	0	0.0689929	0.0763637	0.135526	0	0.160058	0.0725102	0.0699928	0.186339	0.16278	0.0733096	0
ENSG00000268941	0	0	0	0.210806	0	0.0457065	0	0.0653086	0	0	0	0	0	0	0	0	0	0	0	0	0	0.0483949	0	0	0	0	0.0767087	0	0.0591878	0	0	0	0	0	0.0510049	0	0	0	0.1631	0	0	0	0	0	0	0	0	0	0
ETV3L	0	0	0.0225446	0	0	0	0	0.543324	0	0	0.0275823	0	0	0	0	0.0305864	0	0.0234156	0	0	0	0.0236831	0.0545577	0	0	0	0.0187696	0	0	0	0	0	0.0210188	0	0	0.0707775	0	0.0953248	0	0.0883438	0	0	0	0	0	0	0.0209242	0	0
TMSB4XP1	0.983348	0	0.659971	3.77499	0	0.327394	1.87798	0.935606	0	0.595082	0.807446	0	0	0	0.436127	0	0.869685	2.74188	0.377276	0	0	0.693301	0	0	0.268738	0.732189	1.64839	0	3.39168	0.386688	0	1.05297	0.615305	0	2.19208	0.345324	0	4.65091	0.389426	0.431031	0.382486	0	0.45172	0	0	0	0	1.24138	0
RP11-465O11.1	4.60271	0	0.325168	0	0	0	0	0.691461	0.956439	0.146599	0.198915	0	1.69382	0	0	0	0	0	0	0	0	0.853975	0	0	0.132407	0	0	0	0	0	0	0	0	0.156549	1.26004	0.170142	0.382019	0	0.191871	0	0	0	0.445126	0	0.778606	0	1.96168	0.815503	0
RP11-430G17.1	0	0	0	0	0	0	0	0.0883265	0	0	0.0762274	0	0	0	0	0	0	0	0	0	0	0	0	0	0	0	0	0	0	0	0	0	0	0	0	0	0	0	0	0	0	0	0	0	0	0	0	0	0
ENSG00000263637	0	0	0	0	0	0	0	0	0	0	0	0	0	0	0	0	0	0	0	0.165602	0	0	0	0	0	0	0	0	0	0	0	0	0.137527	0	0.163317	0	0	0	0	0	0	0	0	0	0	0	0	0	0
GRIP2	0	0.162876	0.315917	0.0261256	0.0063658	0.536238	0.0054154	1.09536	0	0.0960957	0.0139702	0.0352066	0.00660895	0.0327127	0.0352136	0	0.0150471	0.106739	0.0609237	0.00427306	0.0232978	0.0279891	0	0.0091541	0.0278978	0.0281515	0.0538711	0	0.146705	0.0133808	0.501456	0.0182182	0.00354862	0	0.337127	0.0358483	0.013415	0	0.0314429	0.0149152	0.0220589	0.0517374	0.0729452	0.00472085	0.369113	0.0242635	0.0141306	0	0.172672
FAM92B	0	0	0	0.0535319	0	0.0232133	0	0	0	0	0	0.0270521	0	0	0	0	0	0	0	0	0.0477376	0	0.0283104	0	0	0.0173049	0.0389587	0	0	0.10967	0.0342498	0	0	0.0225286	0	0	0.0274877	0.0329765	0	0	0	0	0	0	0.0280118	0.149149	0	0	0
BHMG1	0	0.018742	0.0486155	0	0.0271027	0.0160779	0	0	0	0	0	0	0	0	0	0.0219857	0	0	0	0	0.0330638	0.0170236	0	0.0129913	0	0	0	0.0203889	0	0	0	0.0258549	0	0.0156037	0.10765	0	0.0380768	0.02284	0	0	0.0187834	0	0.0443668	0	0	0	0.7069	0.0203208	0
SPATA12	0.0275077	0.0213517	0	0	0	0	0	0	0	0.033293	0	0.0213457	0	0.0226671	0.0244	0	0	0	0	0	0.0376678	0	0.0223386	0.0296006	0.0300701	0	0	0.0232279	0.0237193	0	0	0	0	0	0.06132	0	0.0216894	0	1.17651	0	0	0.0295231	0	0	0	0	0.0171347	0.0231504	0.0204275
ENSG00000253901	0	0	0	0	0	0	0	0	0	0	0	0	0	0	0	0.0724686	0	0	0	0	0	0	0	0	0	0	0	0	0	0	0	0	0	0	0	0	0	0	0	0	0	0	0	0	0	0	0	0	0
ENSG00000230908	0	0	0	0	0	0	0	0	0	0	0	0	0	0	0	0	0	0	0	0	0	0	0	0	0	0	0	0	0	0	0	0	0	0	0	0	0	0	0	0	0	0	0	0	0	0	0	0	0
CDR2L	1.08875	2.03988	2.19213	4.03548	0.948172	1.99992	0.914162	1.76815	0.469384	0.692944	0.971058	2.03931	0.459382	1.08278	1.71503	0.769159	2.58987	2.09363	2.08857	1.28707	1.15672	2.31607	1.1433	0.545394	3.71414	1.71451	3.25155	1.41073	2.37938	0.649583	1.45693	1.50753	1.02188	0.630801	6.65341	1.47661	2.90101	0.905585	46.2835	2.50134	1.5333	0.745434	1.01752	1.43757	1.55358	1.92747	1.53177	1.27964	2.30008
LGALS2	10.9023	0.933363	2.90531	3.07744	0.989804	1.44124	1.22477	1.67799	1.58251	0.291073	4.01529	0.559861	0	5.87912	3.34206	2.48179	1.84335	3.4646	1.59932	1.87243	4.72026	1.63905	2.21341	0.345055	1.00777	51.9297	1.03024	1.55692	2.48846	2.33273	1.73268	0.600878	2.95948	0.932488	5.95673	0.675634	3.98213	0.22749	0.761921	9.55764	0.68598	0.516227	14.1408	0.333652	1.4171	3.6012	3.34564	2.02398	2.61936
ENSG00000248187	0	0	0.027448	0	0	0	0.0390523	0.0778231	0.053823	0.0247492	0.0335814	0	0	0	0	0	0	0	0	0.123258	0	0.144171	0.0332119	0.0220044	0.0447068	0.040602	0.0914077	0	0	0.0321644	0	0.0437925	0.0255903	0.0264291	0.0911677	0.0287238	0.0322468	0	0.0323922	0.0358528	0.0318149	0.0219468	0	0.0680873	0.098585	0.131229	0.0509502	0.0688379	0.0607412
CTD-3187F8.15	0.157663	0	0.105815	0	0	0	0	0.150008	0	0	0	0	0	0	0	0	0	0	0.120979	0.118793	0.215897	0.111159	0	0.0848294	0.258524	0	0	0	0	0	0	0	0	0	0	0	0	0	0	0	0	0	0.144851	0	0.126685	0	0	0.132689	0
SUN3	0	0.0297469	0	0	0	0.0255186	0	0.0364627	0.100872	0	0.031468	0	0.04466	0.063159	0	0.0697907	0	0	0	0	0.0524783	0.0270195	0	0	0	0	0.0428276	0.0323608	0.0330454	0.0602804	0.037651	0.0410365	0.0719395	0.0495317	0.0569535	0	0	0	0	0	0.0596254	0	0.105627	0	0	0.0409902	0.286463	0	0
HES7	0	0	0	0	0	0.118303	0.0678607	0	0	0	0.029177	0	0	0	0	0.0323548	0.031426	0.0743081	0	0	0.0486576	0	0	0.0191184	0	0	0.0595643	0.0300048	0	0	0	0.0760977	0	0.0229628	0.052807	0	0.0280174	0	0.22515	0	0	0	0	0	0	0	0	0	0
ENSG00000268193	0	0	0.0650336	0	0	0.0645228	0	0	0	0	0	0	0	0	0	0	0	0.0675462	0.0743536	0.0730101	0	0	0	0	0	0.0481	0	0	0	0	0	0	0	0	0	0	0	0	0	0	0	0	0	0	0	0	0	0	0
PTPRZ1	0	0	0.00449209	0	0.0300515	0	0.00639124	0.222887	0	0	0.0164876	0.00519383	0	0.0386074	0.0415589	0.0243778	0.0059195	0.0233282	0.00513585	0	0	0	0	0.154852	0.0365832	0.00996727	0.00747982	0	0.0115427	0.00526397	0	0	0.00837614	0	0.119363	0.0047009	0.0527746	0.316564	0.0159038	0.00586761	0	0	0	0	0.0107562	0.00715892	0.0458614	0.00563295	0.0695857
FTH1P22	0.255292	0.0990801	0.171339	0.588027	0	0	0	0.242898	0	0	0.419251	0.0990524	0.297504	0	0.113225	0.232457	0.112892	0	0.195893	0.577061	0.349586	0	0.414638	0.0686792	0	0.316812	0.427946	0.323359	0.880533	0.20078	0.125407	0.273366	0.319485	0.0824893	0.0948494	0	0.301942	0.241489	0.202202	0.335707	0	0.0684994	0.234547	0.318766	0.205133	0.136529	0.159024	0	0.284374
ADAP2	1.09742	1.15408	1.3899	3.72365	1.35103	1.30826	1.41975	1.17886	2.53911	1.04972	1.96209	1.35979	1.17574	1.18143	2.59059	2.72377	2.45773	2.52938	4.93024	4.69445	1.64818	2.35861	1.36554	0.714263	5.64994	2.85554	2.17587	1.36012	2.44201	1.09974	4.29527	2.8051	1.18508	1.87592	4.94532	3.03333	3.61471	1.0046	9.44904	2.34308	2.16181	2.12768	1.59367	0.825109	2.1476	3.04805	2.08384	2.23448	4.25879
ENSG00000250958	0.223865	0	0	0	0	0	0	0	0	0	0	0	0	0	0	0	0.0989945	0	0	0	0	0	0	0	0	0	0	0	0	0	0	0	0	0	0	0	0	0	0	0	0	0	0	0	0	0	0.139447	0	0
IFI16	5.78	2.93909	4.01387	5.87213	2.27991	3.31444	5.39955	4.11559	2.07909	1.24434	5.12699	3.62905	1.98711	2.13865	3.50327	1.51839	5.78831	3.86305	6.77301	5.56423	5.06484	9.07846	3.27857	1.06586	5.84558	5.25906	5.83583	4.44665	6.0651	8.30275	6.17133	2.94021	16.7262	2.67381	10.9003	4.63194	6.23808	2.47876	6.24634	6.51797	4.21356	1.88393	4.16992	3.72596	13.7215	3.79516	23.6565	1.58279	8.87322
UAP1L1	0.502563	0.585141	1.31544	0.636668	0.253851	6.54229	0.431904	0.621612	0.396842	0.479005	0.639629	0.419234	0.702793	0.403773	4.27954	5.34259	0.511144	3.39815	0.636291	1.10759	2.15059	0.593499	0.459139	0.209561	2.73316	19.2402	0.91265	0.583512	1.69006	0.335964	0.543121	0.847575	0.542454	0.430325	5.84429	0.414742	0.505237	0.606123	5.32393	0.715937	0.302991	0.606809	0.692586	0.585682	0.504775	1.03476	0.524359	2.75979	2.92969
NEURL1	7.3989	0.135009	0.215512	0.575266	0.0150182	0.525638	0.0638802	0.649229	0.10565	0.0728708	0.274655	0.0311473	0.124735	0.110251	0.189888	0.353301	0.0236661	0.242491	0.811056	0.0604861	0.109928	0.103765	0.0217307	0.0431927	2.12807	0.39849	0.209329	0.0112979	0.196128	0.126272	0.0394346	0.100288	1.33951	0.155634	0.556746	0.150353	1.18156	0.607496	12.8968	0.187669	0	0.0574395	0.799001	0.356398	0.118258	0.0858638	0.0666739	0.135123	0.387496
PI3	0.460146	0.535754	0.0772063	2.11975	0	0.3064	0.988626	7.77105	0.151395	0	0	0	0	20.7597	66.8363	0.104747	10.6827	0.801892	11.2104	0	8.66392	0.567738	0.0934193	0.185684	61.9331	1.8273	0.128557	0	28.6669	0	0.339055	0.123181	0.503867	0.520383	10.343	36.9234	0.544228	4.13503	1.91339	0.100848	0	0	9.19489	0	0.0924341	0.369125	0.358285	0.193629	0.341709
OR2I1P	87.5911	164.456	145.674	27.4165	7.15188	259.174	17.5169	16.9209	20.8251	24.5754	132.922	2.82529	73.5978	21.0013	17.7004	30.2194	212.522	85.8518	179.069	706.814	77.1819	4.93648	0.0568597	1.46921	37.4659	106.978	67.1352	6.50357	83.4974	16.9053	9.49283	1.27456	156.187	40.5416	64.0974	4.03243	4.36138	4.83488	84.0163	123.56	0.0544679	2.14169	110.257	14.5126	29.3115	430.389	95.3403	74.8951	402.963
HTR7	0.0847985	0.0329107	0.0426842	0.19532	0	0.0423489	0	0.0201704	0.0279	0.0256583	0.0696296	0.0329015	0	0.0174691	0.0188046	0.0386067	0	0.059111	0.162671	0.30349	0	0.0448398	0.0344318	0.0114063	0.139047	0.0105233	0.0592282	0	0.05484	0	0.124966	0.045401	0.0530605	0.0547997	0.157527	0.0595577	0.100294	0.0401068	0.52052	0.111509	0	0.0227529	0.175292	0.141176	0.153309	0.204074	0.0396162	0.0178416	0.141688
ENSG00000258754	0	0.00758229	0.39336	0	0.153506	0	0	0	0.0128557	0	0.0802098	0.0379009	0.113835	0	0	0	0.0950318	0	0.00749555	0	0	0	0.00793274	0.0052558	0	0	0.0163747	0	0	0	0	0	0	0	0	0	0	0	0	0	0	0	0	0	0	0	0.0182544	0	0
ENSG00000248494	0	0	0	0	0	0	0.0714565	0	0	0	0	0	0	0	0	0	0	0	0	0	0	0	0	0.0402629	0	0	0	0	0	0	0	0	0	0	0.166815	0	0.059004	0	0.0592701	0	0	0	0	0	0	0	0	0	0
ENSG00000227088	0	0	0	0	0	0	0	0	0	0	0	0	0	0	0	0	0	0	0	0	0	0	0	0	0	0	0	0	0	0	0	0	0	0	0	0.164151	0	0	0	0	0	0	0	0	0	0	0.58234	0	0
BEAN1	0.0899526	0.0768042	0.0664085	0.124315	0.0100969	0.0539075	0.051537	1.00135	0.248604	0.0217742	0.00738618	0.027921	0.0209652	0.0741234	0.0877692	0.00819065	0.0636441	0.106597	0.0414139	0.0271104	0.0615886	0.107814	0.00730491	0.0629179	0.108165	0.0893034	0.110577	0.167106	0.0698078	0.0848941	0.0441873	0.0385284	0.135085	0.0465043	0.126997	0.151626	0.0283706	0.0340356	1.17556	0.0315431	0.11896	0.0482717	0.0413215	0.0599028	0.0795066	0.0192425	0.100858	0.037852	0.126919
VN2R10P	0	0	0	0	0	0	0	0	0	0	0	0	0	0	0	0	0	0	0	0	0	0	0	0	0	0	0	0	0	0	0	0	0	0	0	0	0	0	0	0	0	0	0	0	0	0	0	0	0
ENSG00000232316	0	0	0	0	0.245487	0	0	0.208084	0	0.0661746	0	0.169711	0.254864	0	0.193994	0	0.0967112	0.076226	0	0	0	0	0	0	0.0597687	0	0	0.0923376	0	0	0	0	0	0.141333	0.812549	0	0.431109	0	0	0	0.0850668	0.0586815	0.301395	0	0	0	0.0681155	0	0
HIST1H4L	0	0	0	0	0	0	0.203147	0	0	0	0	0	0	0	0	0	0	0	0	0.160295	0	0	0	0	0	0.105604	0	0	0	0	0	0	0	0.137482	0	0	0.167745	0	0	0	0.165499	0	0	0	0	0	0	0	0
B3GNT3	17.106	21.4729	0.793772	49.9214	0.0971385	5.49355	1.43236	110.58	0.721313	2.95019	0.142119	0.179078	0.537861	0.831963	2.96817	0.288929	5.0004	0.281516	13.1481	1.99961	2.05407	0.305071	0.0234259	0.248332	10.1539	4.00938	4.25529	1.38844	3.88031	0.022687	0.0283406	1.01933	10.5593	0.838874	38.9043	8.00279	1.09177	22.1297	303.395	0.0252886	1.25667	0.154801	0.583055	0	2.43378	0.061708	0.628907	4.83117	2.42066
ENSG00000249216	0	0.355322	0	0	0	0	0	0	0	0	0	0	0	0	0.2707	0	0	0	0.117086	0	0	0	0	0	0.0834014	0.0757436	0	0	0	0	0	0	0	0	0.113383	0	0	0	0.120856	0	0.118702	0	0	0	0.122608	0	0	0	0
ENSG00000229522	0	0	0	0	0	0	0	0.140341	0	0	0	0	0	0	0	0	0	0	0	0	0	0	0	0	0	0	0	0	0	0	0	0	0	0	0.219208	0	0	0	0	0	0	0	0	0	0	0	0	0	0
ENSG00000261266	0	0	0	0	0	0.137904	0	0	0	0	0	0	0	0	0.183704	0	0.0915815	0	0	0	0	0	0	0	0	0.0514017	0	0	0	0	0	0	0.0647942	0	0	0.0727282	0	0	0	0	0	0.0555689	0	0	0	0	0.0645025	0	0
ENSG00000269019	0.0693584	0.107673	0.0930993	0	0	0.138552	0	0.263964	0.0912798	0.0839457	0	0.0538216	0	0	0	0	0.0613414	0	0.106441	0.261295	0.0949764	0.0489005	0.11265	0	0.151639	0.172145	0.0387552	0.0585673	0.119613	0.109097	0.272567	0	0.0433992	0.0448218	0.618454	0.0487135	0.164065	0.0656084	0.769087	0.243215	0	0.0744403	0.318611	0.115471	0.222924	0.370925	0	0.233488	0.206025
XXbac-BPG181M17.5	0	0	0	0	0	0	0	0	0	0	0	0	0	0.089372	0	0	0	0	0.166445	0.0817188	0	0	0	0	0.177841	0	0	0	0	0	0	0	0.0678645	0	0	0	0.0855173	0	0	0	0.0843718	0	0	0	0	0	0	0	0
ENSG00000253585	0	0	0	0	0	0	0	0	0	0	0	0	0	0	0	0	0	0	0	0	0	0	0	0	0	0	0	0	0	0	0	0	0	0	0	0	0	0	0	0	0	0	0	0.0827138	0	0	0	0	0
CCDC185	0.0969464	0	0	0	0.0725465	0.0430362	0.154289	0.122986	0	0.019556	0.265349	0	0	0	0.0573293	0.0294249	0	0.0225264	0	0	0	0	0	0	0	0.14437	0	0	0	0	0	0	0	0.0208834	0	0	0	0	0.0255952	0	0	0	0.326584	0	0	0.0691286	0.986349	0.0543933	0
ST6GALNAC4	2.77618	2.50752	1.57527	4.41803	3.39948	1.64693	1.32548	16.5448	0.763939	1.81749	1.92728	1.62551	6.47044	1.91331	4.70122	9.72076	3.2142	1.30187	9.50864	2.64322	1.24416	1.79718	0.901799	1.18139	4.00041	3.20715	2.97556	1.47049	6.31104	6.29213	1.53731	1.64851	5.96939	3.09884	4.98843	1.68395	2.58698	3.07968	11.3941	1.96914	22.0875	0.853247	2.66652	1.07144	1.74402	2.69943	5.91108	3.14356	3.07369
ENSG00000255443	0	0	0	0	0	0	0	0	0.595263	0	0	0.175493	0.395321	0	0	0	0	0.0788231	0	0.0851992	0.154842	0	0.0918279	0	0	0.0561303	0.0631834	0	0	0	0	0.121082	0.353774	0	0.0840234	0	0	0	0	0	0.263896	0	0	0	0	0	0	0	0.167944
ENSG00000232949	0	0	0	0.182989	0	0	0	0.113381	0	0	0	0	0	0	0	0	0	0	0.0914403	0	0	0.0840176	0	0	0	0	0.0665865	0	0	0	0	0	0	0	0	0	0	0	0	0	0	0	0	0	0	0	0.37115	0	0
RP11-369K16.1	0	0	0	0.143758	0	0.0311693	0.93866	0.044537	0	0	0	0	0.109099	0	0.124564	0	0	0	0	0	0	0	0	0	0.10234	0	0.0523113	0	0.121089	0	0.137965	0	0.0292899	0.1815	0.486956	0.131506	0	0.0442787	0.407827	0.0410361	0	0.075359	0	0	0	0	0	0	0.104284
SEMA3A	0.389572	0.0494819	0.142615	0.130519	0.0397531	0.0707472	0.0676362	0.0606532	0	0.00857283	0.0814253	0.131915	0	0.0525302	0.0439804	0.0773947	0.0250576	0.0148125	0.0217404	0.101401	0.0387973	0.0049939	0.0920337	0.00381103	0.205188	0.03516	0.0237469	0.0418677	0.0549687	0.0445654	0.0347944	0.0530922	0.0265925	0.0457736	0.526323	0.0746219	0.0614345	0	0.157084	0.0869329	0.0551014	0.0114032	0.104121	0.0530653	0.051223	0.0378802	0.829481	0	0.12098
ENSG00000226476	0.406082	0.888304	0.941505	0	3.56366	0	0	1.05373	0.825935	0	0.424381	3.69546	0.64531	0	0	0	0.718288	0	0	0	0	0	0	0.0198627	0.0605332	0	0	0	0.222827	1.01618	0	0.0395302	0	0	0.274314	0.155569	0	0.244444	0	0	0	0	0	0.399492	0	0.197428	6.43877	0	0
PRSS22	0.0278073	0.129506	0.0186628	0	0	0.24071	0.0265529	0	0.0365961	0	0	0	0.0324052	0.0458279	0.0246658	0	0.0245931	0.310141	0.341397	0.0419036	0.0380781	0	0	0.0149615	0	0	0.0466133	0	0.239776	0	0.0819585	0.029776	0.0347994	0.0539101	1.92162	0.0195303	0.175405	0	25.3943	0.048755	0.064896	0	0.0255476	0	0	0.0297424	0.0173214	0.0702077	0
ENSG00000257253	0	0	0	0	0	0	0	0	0	0	0	0	0	0	0	0	0	0	0	0	0	0	0	0	0	0	0	0	0	0	0	0.0984422	0	0	0	0	0	0	0	0	0	0	0	0	0	0	0	0	0
ENSG00000254557	0	0	0	0	0	0	0	0	0	0	0	0	0	0	0	0	0	0	0	0	0	0	0	0	0	0	0	0	0	0	0	0	0	0	0	0	0	0	0	0	0	0	0	0	0	0	0	0	0
CCL4L1	1.56794	0.110641	1.05232	4.66942	2.29329	0.980775	0.04537	0.632891	0.750363	0.66132	3.00408	2.94959	4.26345	0.117457	0.54789	0.0865265	0.546277	1.32481	9.11457	2.64916	8.45814	2.21092	1.31188	1.20152	0.856998	0.353778	0.716818	3.41028	2.08945	5.97885	5.08809	1.57719	0.981096	0.214933	7.48475	0.53393	0.487026	0.449443	4.62879	6.3729	0.295694	3.08517	1.30957	2.0171	2.71063	3.20164	2.4269	1.31957	2.75214
ANXA1	5.87939	4.31512	9.17137	8.89411	3.39774	6.25034	8.90765	3.68314	3.7539	3.2145	15.0208	8.71818	1.93335	3.83745	4.98281	3.32605	11.0045	7.07073	8.0625	9.72607	7.55278	7.81845	5.66093	5.05043	5.93391	9.4056	13.8402	13.7757	10.9927	2.90715	10.7375	6.76313	7.5763	4.23208	13.6362	5.58076	11.8879	2.07868	10.3739	13.7403	3.06802	3.17071	8.28962	9.61867	9.68229	8.63895	8.74786	3.5151	13.8224
ENSG00000254844	0.357501	0.0924985	0.479871	0	0	0.158701	0	2.94792	0	0	0	0.0924726	0	0.0981969	0	0	0	0	0.0914403	0	0	0	0	0	0	0.887302	0.0665865	0	0	0	0	0	0	0.616078	3.9847	0	3.85242	0	13.4027	0	1.29784	0	1.53277	0	0	0	0.14846	0	0
RP11-555K2.2	0	0	0	0	1.71276	0	0	0	0	0	0.156617	0.148009	0	0	0	0	0	0	0	0	0	0	0	0	0	0	0	0.16106	0	0	0	0	0	0	0	0	0	0	0	0	0	0	0	0	0	0.204009	0.950486	0	0
CPA5	0	0.0173766	0.180296	0	0.15077	0	0	0.191697	0.088386	0	0	0.0521153	0	0.0737884	0	0.0203841	0.0197989	0	0	0.0337349	0.0306551	0.0315668	0.181798	0	0.0122359	0.0888998	0.0375265	0	0.0193034	0.404946	0.0219938	0.143828	0.0840467	0	0.0332693	0	0	0.0423523	0.0177311	0.0785014	0.13932	0.192214	0.0205674	0.03727	0.35976	0.0239444	0.474121	0	0
KRT36	0	0	0	0	0	0.0236987	0	0	0	0.0215378	0.0292239	0	0	0.0293274	0	0.0324069	0	0.0248092	0.0273095	0.0536321	0	0.0250927	0	0.0382983	0.0778114	0	0	0	0	0	0.034966	0	0	0	0.026446	0.0249967	0.0280625	0	0.0845671	0.0312006	0	0.019099	0.0653965	0.0592523	0.0571952	0.038067	0	0	0
AL591806.1	0	0	0	0	0	0	0	0	0	0	0	0	0	0	0	0	0	0	0	0	0	0	0	0	0	0.219657	0	0	0.381564	0	0	0	0	0.285963	0	0	0	0	0	0	0	0	0	0	0	0	0	0	0
ENSG00000257023	0	0	0	0	0.172866	0.0512739	0.0735289	0.0732639	0	0	0	0	0.179469	0	0	0	0	0	0	0	0.105444	0	0	0	0	0	0.0430263	0	0	0	0.0756515	0	0	0.0497615	0.0572178	0.0540821	0	0	0	0	0.119804	0	0	0	0	0	0.0479653	0	0
ENSG00000229950	0.470752	0.0913504	0.500244	0	0.132102	0.522437	0.824114	0.522546	0.0516281	1.25822	0.16106	0	0.54859	0.032326	0.139189	0.571525	1.3531	0.273458	0.120407	0.147789	0.268595	0.96804	0.0637151	0	0.0428837	0.0389462	0.1096	0.0331259	0.0676532	0.0925582	0.0770823	0.210033	0.122734	0.101405	2.24455	0.0275525	0.897022	0.593733	0.403926	0	0	0	0	0.914349	0.40978	0.125878	2.12595	0.198092	0.0582642
LCE2C	0	0	0	0	0.121344	0	0	0	0	0	0	0	0	0	0	0	0	0	0	0	0	0	0	0	0	0	0	0	0	0	0	0	0	0	0	0	0	0	0	0	0	0	0	0	0	0	0	0	0
RFPL4B	10.7948	0.1627	0	0	5.41144	0	0	0	1.56319	0	0.0286856	1.27413	0.651378	0.0863616	0	0	0.339864	0	0	0	0	0.0492609	0	1.59769	0	0	0	0	0	1.12648	0	0.074816	0	0	0	0.736086	0	0	0.0830093	0	0	0	0	1.4831	0.0842123	3.73658	0.435222	0	0
SPRR2E	0	0	0	0	0	0	0	0	0	0	0	0	0	0	0	0.329367	0	0	0	0	0	0	0	0	0	0	0	0	0	0	0.266532	0	0	0	0	0	0	0	0	0	0	0	0	0	0	0	0	0	0
ENSG00000226791	0.0947777	0.122612	0.0424065	0	0	0.0210367	0	0.0601175	0	0	0.129706	0	0.0736327	0.0260332	0	0	0.111763	0.0440449	0.218177	0.238039	0.216308	0.0445481	0	0	0.120874	0.109776	0.0706115	0	0.136208	0.0248467	0.0620767	0	0.0593047	0.0408324	0.211278	0	0.0498206	0.0597689	0.275249	0.13848	0	0	0.087076	0.0525967	0.126926	0.202746	0.078717	0.15953	0.211149
TC2N	0.356338	0.15925	0.144942	31.9354	0.181809	1.11448	8.4138	1.82875	0.0994767	0.248314	2.18117	0.192723	0.0880849	2.83844	0.948241	2.34991	0.20055	0.617223	4.73942	0.414935	1.07941	0.190328	0.166611	2.71901	10.8951	2.21372	0.573194	0.14589	5.31657	0.0509544	0.477391	0.566567	1.79051	1.41656	9.76485	3.04118	1.35375	2.22672	19.8419	0.700504	1.21802	2.42216	1.06151	0.233703	0.0780885	0.323387	2.75775	0.136315	4.75514
CATSPER1	0.0494053	0.0575232	0.0497373	0.0758651	0.027728	0.0164489	0.0235883	0.728603	0.0975305	0.0448471	0.101419	0.0575072	0.115149	0.0814226	0.131471	0.112465	0.174778	0.0344393	0.0568652	0.372251	0.10148	0.104498	0.060182	0.0398733	0.0675095	0.122622	0.013803	0.0417186	0.0639017	0.0388558	0.0485386	0.105806	0.0309141	0.0957822	0.201912	0	0.0584331	0.23367	0.450007	0.0866232	0.0192168	0.0265126	0.0453906	0.020563	0.0198491	0.422747	0.0307749	0.187107	0.0917222
ARHGAP22	0.273998	0.243062	0.538543	0.150265	0.0659047	0.73631	0.0654096	0.474838	0.412112	0.201343	0.192844	0.129091	0.467551	0.185464	0.104161	0.454427	0.181745	0.279675	0.352914	0.685701	0.254601	0.0551942	0.103308	0.0737114	0.262082	0.179728	0.639743	0.13221	0.472525	0.169315	0.14421	0.0628706	0.636804	0.0632382	0.632609	0.0687288	0.22376	0.111079	4.72014	0.420355	0.175087	0.0315079	0.341637	0.0651662	0.220163	0.533797	0.335255	0.197654	0.428748
FXYD4	0	0	0.053867	0	0	0	0	0	0	0	0	0	0	0.0661374	0	0	0	0.0559482	0	0	0	0	0	0.043184	0	0	0	0	0	0	0	0	0	0	0	0	0	0	0	0	0	0	0	0	0	0	0	0	0
ENSG00000224743	0	0	0.00684302	0	0	0	0	0	0	0	0.00837213	0	0	0	0	0	0	0	0	0	0	0	0.00828002	0	0.0055729	0	0.00569719	0	0	0	0	0.0109179	0.00637989	0	0	0	0	0	0.00807566	0	0	0.00547153	0	0	0	0	0	0	0
LINC01012	0	0.0147626	0.0510579	0	0	0.0886496	0	0.0180955	0	0	0.0624672	0.0295171	0.0886546	0.0313442	0.0337405	0	0.0841027	0	0	0.0143301	0	0	0	0	0.0103953	0.0188817	0	0	0.0163996	0.0149578	0	0	0	0	0.282646	0	0	0.0719624	0.0451913	0.0166731	0	0.0306186	0.0873671	0	0	0	0.0473881	0.240094	0.0282473
ENSG00000247699	0	0	0	0	0	0	0.0438629	0.0218524	0	0	0	0	0	0.0189258	0	0	0	0	0.0176236	0	0	0	0	0	0	0	0.0128335	0	0	0	0	0	0	0	0	0	0	0	0.0181912	0	0	0	0	0	0	0	0.0143066	0	0
GAL3ST4	0.156317	0.561172	0.472102	0.600087	0.153529	0.28624	0.354506	2.6585	0.205722	0.319263	0.657818	0.439715	0.0455409	0.241517	0.710616	0.160126	0.898615	0.313274	1.40937	2.76781	0.454864	0.454615	0.285621	0.0841052	2.3389	0.504363	0.709674	0.181495	1.12885	0.092204	0.403133	0.209229	0.330113	0.277797	2.03269	0.425429	0.493015	0.517528	4.64285	0.256943	0.243205	0.157284	0.287229	0.260243	0.471014	1.00317	0.304284	0.526224	0.725515
ENSG00000248458	0	0	0	0	0.193353	0	0	0	0	0	0	0	0	0	0	0	0	0	0	0	0	0.0404825	0	0	0	0.114009	0	0	0	0.0451582	0	0	0	0.0371059	0.0426658	0	0	0	0	0	0	0	0	0	0	0	0.0357665	0	0
OCSTAMP	0	0	0.0218052	0	0	0	0	0.0927363	0	0	0.0266777	0	0	0	0	0	0	0	0	0	0	0.0687193	0	0	0	0	0.0363081	0	0.028015	0	0.0319195	0	0	0	0	0	0	0	0.025733	0	0	0	0	0	0	0	0	0.0273431	0
ENSG00000255146	0	0	0	0.0539284	0	0	0	0	0	0.0212529	0	0	0	0	0	0	0	0	0	0	0	0	0	0	0.0191955	0	0	0	0	0	0	0	0	0	0	0	0	0	0	0	0	0	0	0	0	0	0	0	0
CST6	0	0	0	0	0	0	0	0	0	0	0.143617	0.067862	0	0.216188	0.155144	0	0.0773435	0	0	0.131784	0.119753	0	0.142037	0.0470529	0.0477992	0.130231	0.0488652	0	0.150816	0	0	0	0.218883	0	0.0649825	0	0.0689546	0.0827236	0.0692656	0	0	0	0	0	0	0.280613	0	0	0.129885
ENSG00000239589	0.0353252	0	0.0948335	0	0.237909	0.0235222	0	0	1.3947	0	0	0	0.288163	0	0	0	0.124968	0	0	0	0	0	0	0	0	0	0	0	0	0.305605	0	0	0	0.0228283	0	0	0	0	0	0	0	0	0	0	0	0	12.6745	0	0
LILRA5	0.377136	0.146368	0.379671	0.926588	0.296328	0.175788	0.576199	0.322944	0.2978	0.433632	0.402576	0.526779	0.791091	0.341848	0.501794	0.171701	0.200126	0.552075	0.173633	1.05139	0.568078	0.584973	0.4594	0.26379	1.31926	0.299532	0.27395	0.382152	0.195118	0.355928	7.92914	0.726906	0.377573	0.341206	0.560474	0.582735	0.564997	0.356746	0.597416	2.24822	0.293384	0.688107	0.900874	0.596479	0.606074	0.363043	0.0939685	0.222178	1.20428
GFPT2	0.0972033	0.107786	0.0465984	0.298524	0.0155869	0.15719	0.0928187	0.317088	0.0182751	0.02521	0.0570111	0.0646535	0.0323645	0.0228852	0.997709	0.0126441	0.0859678	0.145196	0.18114	0.0104627	0.399318	0.0685324	0.0451071	0.0298855	1.29028	0.0827159	0.256052	0.128983	0.359213	0	0	0.0297386	0.782003	0.0897373	1.77476	0.0780231	0.197083	0.0394062	2.91459	0.0608673	0.151234	0.00745181	0.178609	0.0809142	0.066947	0.148525	0.0172996	0.058433	0.938395
GDF2	0	0.0790613	0	0.0521354	0	0	0.0324204	0	0	0	0.0278786	0.0263464	0	0.587524	0	0.12366	0.0300275	0.852015	0	0	0	0.837813	0	0	0	0	0	0.0286695	0.029276	0	0	0	0	0	0.0252285	0	0	0.0321162	0	0.327407	0.026412	3.09736	0	0	0.0545621	0	0	0	0.5799
CARD14	0.064694	0.106709	0.0976931	0.0496709	0.0544629	0.258469	0.0308879	0.107718	0.276709	0.0734065	0.0398411	0.025101	0.0942387	0.0266548	0.0717314	0	0.00715201	0.17475	0.031026	0.0365584	0.0775155	0.0684179	0.0131343	0.0522122	0.106081	0.144511	0.131039	0.00682858	0.0697303	0.0508799	0.0635591	0.0519556	0.283364	0.0104519	0.144216	0.0397577	0.0828918	0.00764952	0.0896705	0.0496252	0.0188726	0.0477359	0.0965849	0.0875105	0.0519829	0.0778454	0.307275	0.0612521	0.0540477
PLA2G4A	0.0692619	0.107523	0.0929698	0.460877	0.0777446	0.153733	0.0881835	0.351463	0.0607685	0.0419144	0.227489	0.0895778	0.0538095	0.285369	0.286706	0.105111	0.163349	0.17703	0.124009	0.260932	0.158074	0.292995	0.0187489	0.0372659	0.429046	0.32089	0.425714	0.116972	0.457877	0.07263	0.567057	0.173053	0.202248	0.119358	0.960701	0.291874	0.327673	0	0.731444	0.303595	0.0538806	0.123894	0.0848448	0.11531	0.16696	0.0987757	0.560869	0.0194302	0.651505
ENSG00000257268	0	0	0	0	0	0	0	0	0	0	0	0	0	0	0	0	0	0	0	0	0	0	0	0	0	0	0	0	0	0	0	0	0	0	0	0	0	0	0	0	0	0	0	0	0	0	0	0	0
PILRA	2.01841	1.59239	1.4879	2.08321	1.81992	1.8728	2.14854	1.35374	1.17576	1.60191	2.14641	0.795975	0.848318	1.33604	1.81973	0.331419	1.31688	2.35267	2.25971	6.65662	2.2202	1.23643	0.886739	1.01478	3.63519	2.28307	1.44213	0.977923	1.62631	1.06696	4.3236	1.94872	1.34579	2.13831	4.45026	1.48734	1.38277	1.40849	3.51183	4.96029	0.617773	1.15418	3.25279	3.25017	2.02065	4.74244	1.71073	2.47842	3.88238
MIR181A2HG	0.902393	0.0778273	0.403759	0.153965	0.225091	0.133529	0.095743	8.58582	0	0.0606767	0	0	0.233689	0.165244	0.266815	0.0912973	0.443382	0.139786	0.0769369	0	0.1373	0	0.0814244	0.0539474	0.383621	0.0995423	0.224101	0.0846661	0.345829	0.0788562	0	0.322093	0	0	2.53314	0	0.790583	0.284534	1.11181	0.087899	0.233998	0.107612	0.644827	0.0834635	0.322263	0.428973	0.312282	0.168767	0.521209
ENSG00000269959	0	0.0130039	0	0	0	0	0	0.0159398	0	0	0.0137563	0.0130003	0	0	0.0148605	0	0	0	0	0	0.022941	0.0118117	0	0	0	0	0.0093611	0	0	0	0	0.0179392	0	0	0	0	0	0	0.0265384	0	0	0	0	0	0.0134615	0	0	0	0.0124411
MRPS31P2	0	0	0	0	0	0	0	0	0	0	0	0	0	0	0	0	0	0	0	0	0	0.0903433	0	0	0	0	0	0	0	0	0	0	0	0	0	0	0	0	0	0	0	0	0	0	0	0	0	0	0
RAP1GAP2	0.252861	0.574799	0.181829	0.443754	0.0912309	0.318708	0.120727	5.12101	2.27004	0.819755	0.71187	2.29855	0.115764	0.14139	4.13342	0.0822296	0.119804	0.346232	0.187098	0.115674	0.136029	0.235581	0.0733374	0.0485894	4.88664	0.125518	1.14041	1.15911	0.459434	0.0213073	0.0621063	0.299773	0.22038	0.326815	2.82509	2.036	2.47086	0.119595	16.4942	0.348343	1.97409	0.0823856	0.680346	0.210487	0.268486	0.0965919	0.371271	0.0456016	0.543213
ENSG00000264647	0	0	0	0	0	0	0	0	0	0	0	0	0.278242	0	0	0	0.211164	0.166436	0	0	0	0	0	0	0	0	0	0	0	0	0	0	0	0	0	0	0	0	0	0	0	0	0	0	0	0	0	0.200942	0
TDRD5	0.155959	0	0	0.047897	0.0350119	0.0311547	0.0148924	0.0593547	0.369452	0.0188759	0	0.0121023	0.0181746	0.0128514	0.0276678	0.0284017	0	0.0108715	0	0.0117509	0.17085	0	0	0	0.00852434	0.0154833	0.0435722	0	0	0	0	0	0.0292761	0	0.0347662	0.0766756	0	0	0	0	0	0	0	0.0129823	0	0	0.0194296	0.0131255	0.0694899
SLC6A15	0	0	0.00507323	0	0	0.00503338	0	0.0359603	0	0	0	0	0.00880892	0	0	0.0137658	0	0	0	0	0	0	0	0	0	0	0	0	0.019554	0	0	0	0	0	0	0	0	0	0.0838191	0	0	0	0	0	0	0	0.0141258	0	0
DEFB126	0	0	0	0	0	0.0674781	0	0	0	0	0	0	0	0	0	0	0	0	0	0	0	0	0	0	0	0	0	0	0	0	0	0	0	0	0	0	0	0.191717	0	0	0	0	0	0	0.162853	0.108389	0.0631239	0	0
CCL11	0	0.334246	0.247718	0.0944622	0	0.409621	0.117483	0.117059	0	0	0.0505121	0.286417	0	0.0506911	0	0	1.03371	0.085763	0.519235	0	0.926614	0	0	0	0.10087	0.0305361	0.171866	1.71419	0.0530441	0.0483807	0	0	0.153969	0	0.77708	0.0432055	0	0	0.487234	0.0539288	0.047855	0.0330117	0	0.0512074	0	0.0657971	0.0766378	0.0517719	0.365461
DSG3	0	0	0	0	0	0	0	0	0	0	0	0	0	0.0494983	0	0.0218783	0	0	0	0	0	0	0	0	0	0	0.0335644	0	0.0103592	0	0.295075	0	0	0.0077637	0	0	0.0473634	0.0113642	0.0190308	0	0.0093458	0	0	0	0	0.0256996	0	0	0
ENSG00000230698	0	0	0	0	0	0	0	0	0	0	0	0	0	0	0	0	0	0	0	0	0	0	0	0	0	0	0	0	0	0	0	0	0	0	0.0906649	0	0	0	0	0	0	0	0	0	0	0	0.0760039	0	0
C3orf52	0	0.0513419	0.0295951	0.118497	0.0123742	0.0293627	0.0421072	0.0209777	0.0870501	0.0133426	0.0181042	0.0085546	0	0.00908415	0.0293359	0	0.00974983	0.0153693	0.0169182	0	0	0.0233173	0.0268575	0.00593144	0.0542296	0.0437781	0.0246395	0.00930891	0.00950583	0.121382	0.0108307	0	0.0551843	0.213724	1.06491	0	0.00869234	0.354553	3.43149	0.00966436	0.0171518	0.00591591	0.0202565	0.00917668	0.0265742	0	0.020601	0.00927785	0.0163732
TAF4B	0.0861227	0.0572993	0.503694	0.604558	0.0690503	0.057347	0.0352448	0.0351178	0.0161918	0.0148908	0.070717	0.0286417	0	0.0506911	0.0982195	0.100825	0.0544057	0.0600341	0.0944064	0.129781	0.117933	0.112766	0	0.0132394	0.121044	0.10993	0.144367	0.0935015	0.159132	0.0290284	0.120874	0.118569	0.115477	0.0636062	0.511958	0.0345644	0.0679066	0	0.60417	0.118643	1.21552	0.0528188	0.0226069	0.112656	0.128517	0.0789565	0.153276	0.0103544	0.301505
RP11-338C15.2	0	0	0	0	0	0	0	0	0	0	0	0	0	0	0	0	0	0	0	0	0	0	0	0	0	0	0	0	0	0	0	0	0	0	0.107221	0	0	0	0	0	0	0	0	0	0	0	0	0	0
LTB	16.5183	2.7523	4.5854	2.65602	1.45613	4.72215	1.89939	2.50968	6.20304	0.915883	6.53321	1.14088	7.76031	7.51843	3.68222	8.62286	1.87393	7.44527	4.57892	3.38843	12.7309	1.61582	3.3009	0.279191	1.11084	2.91921	1.95712	1.24147	29.7545	2.89071	2.50651	0.694546	9.903	1.2016	9.63942	3.24965	9.23988	1.0635	7.53483	17.0587	0.302749	1.94922	24.3929	0.719906	0.833894	8.78766	10.1008	3.49364	12.9731
BLACAT1	0	0	0	0	0	0	0	0.0210933	0	0.0134162	0	0	0	0.0182684	0	0	0	0	0	0.0334081	0	0.0156305	0	0	0.0121174	0	0	0	0.0764658	0.0174358	0	0	0.0277442	0	0	0	0	0.020971	0.0877965	0.0388705	0.0172463	0	0	0.0184545	0	0	0.041429	0	0
ENSG00000225970	0	0	0	0	0	0	0	0	0	0	0	0	0	0	0	0	0	0	0	0	0	0	0	0	0	0	0	0	0	0	0	0	0	0	0	0	0	0	0	0	0	0	0	0	0	0	0	0	0
ENSG00000228403	0.243135	0	0	0	0	0.161898	0	0.231331	0	0	0	0	0	0	0	0	0	0	0	0	0	0	0	0	0	0	0.407568	0	0	0	0	0	0	0	0	0	0	0	0	0	0	0	0.223378	0	0	0.52011	0	0	0
HCAR3	0.0931811	0.554515	0.0416921	0.0476952	0	0.0206823	0.0593186	0.73881	0.0408773	0.0187964	0	0	0.0723923	0	0	0	0	0.15156	0	0	0	0	0	0	0.118838	0.0154181	0.0173555	0	0.0267827	0.0977123	0.122062	0	0.116611	0.0401445	0.207719	0.327226	0.0244907	0	0.0246011	0.0816881	0.0966505	0.0166681	0.741946	0.0258553	0	0	0.232173	0	0
APOBEC3C	2.42609	1.66376	2.37126	2.74886	0.898928	1.74095	1.01213	2.44277	1.85993	1.26861	3.63608	1.93746	1.2352	2.11562	2.11022	1.30829	3.70804	2.70916	2.13272	4.02864	4.51559	3.27153	2.1806	1.05188	4.08113	3.36734	2.63227	1.96907	4.20425	3.00101	3.33232	4.16161	1.76862	1.14162	5.32072	2.54766	3.80731	0.824389	19.0478	6.07083	1.246	1.45361	2.55355	1.84307	2.68754	3.60266	3.78541	1.4471	5.64981
LINC00273	0	0	0	0	0	0	0	0	0	0	0	0	0	0	0	0	0	0	0	0	0	0	0	0	0	0	0	0	0	0	0	0	0	0.0295416	0	0	0	0	0	0	0	0	0	0	0	0	0	0	0
ENSG00000254946	0	0	0	0	0	0	0	0	0	0	0	0	0	0	0	0	0	0	0	0	0	0	0	0	0	0	0	0	0	0	0	0	0	0	0	0	0	0	0	0	0	0	0	0	0	0	0	0	0
NPM1P14	0	0	0	0	0	0	0.0731893	0	0	0	0	0	0	0	0	0	0	0	0	0	0	0.0540391	0	0.123718	0.0418933	0	0	0	0	0	0	0	0	0	0	0	0.0604348	0	0	0	0	0	0	0	0	0	0	0	0
IMP3P2	0	0	0	0	0	0	0	0	0	0	0	0	0	0	0	0	0	0.0974088	0	0	0	0	0	0	0	0	0	0	0	0	0	0	0	0	0	0	0	0	0	0	0	0.0749888	0	0	0.112283	0	0	0	0
ENSG00000251085	0	0.113234	0	0	0	0	0.139301	0	0	0	0	0	0	0	0.1294	0	0	0	0	0.109916	0	0	0	0	0	0	0	0.123185	0	0	0	0	0	0	0.108399	0.102459	0	0	0.115544	0	0	0.078285	0	0	0	0	0	0	0
FYB	1.39281	0.447647	0.920173	1.52052	0.598485	0.456473	0.363667	0.538357	0.486895	0.197548	3.08252	0.405303	0.646706	0.403493	1.1872	0.455768	8.68045	1.49427	1.20233	2.94333	2.63737	0.613742	0.432991	0.199057	1.94482	1.11269	0.614091	0.441041	1.32296	0.479239	1.61425	0.361202	1.23918	0.660996	2.02947	1.65841	1.11537	0.236739	4.50745	3.33872	0.194691	0.805822	1.77948	1.24998	0.848106	2.79325	1.30816	0.723458	3.44233
HOMER3	5.29534	6.95587	4.81671	11.7056	1.00153	4.35265	1.44471	35.8952	6.02447	1.34989	2.15016	2.78458	1.24322	2.34958	4.78312	7.38265	2.83054	2.48788	5.17955	2.96681	3.05454	5.66169	1.33891	0.761853	5.25853	4.60239	2.8288	1.16291	8.19549	1.63229	7.50829	4.75635	2.08758	0.789699	32.4584	1.47131	12.6789	5.90809	59.8393	3.48591	2.03705	1.77994	4.27695	4.634	3.78734	3.83813	2.04193	6.25223	4.11963
CTD-2515C13.1	0	0	0	0	0	0	0	0	0	0	0	0	0	0.224163	0	0	0	0	0	0	0	0	0	0.292731	0.148687	0.675174	0.152003	0	0	0	0	0.291292	0	0	0	0	0	0.257325	0	0	0	0	0	0.226446	0.218584	0.87289	1.35561	0.457885	0
ENSG00000254789	0	0	0	0	0	0	0	0	0	0	0	0	0	0	0	0	0	0.0995036	0	0	0	0	0	0	0	0	0	0	0	0	0	0	0	0	0	0	0	0	0	0	0	0	0	0	0	0	0	0	0
HRH1	0.227397	0.250827	0.417688	0.7535	0.174643	0.199234	0.137141	1.58282	0.519781	0.304193	0.255512	0.250757	0.0976304	0.197244	0.403414	0.326932	0.243452	0.258627	0.312242	0.288565	0.213055	0.489411	0.272139	0.109471	0.660699	0.528744	0.334373	0.42446	0.443759	0.0753016	0.552641	0.512623	0.239643	0.239763	1.21837	0.437104	1.08523	0.0679271	0.502406	0.493128	0.148967	0.179832	0.439828	0.14944	0.884741	0.384034	0.32057	0.523769	0.542153
AKR1B1P1	0	0	0	0	0	0	0	0	0	0	0	0	0	0	0.061587	0	0	0	0	0	0	0	0	0	0	0	0	0	0	0	0	0	0	0	0	0	0	0	0	0	0	0	0	0	0	0	0	0	0
ENSG00000257193	0	0	0	0.238142	0	0	0	0	0	0	0	0.120344	0	0	0	0	0.274316	0	0	0	0	0.109341	0	0	0	0.0769824	0.0866558	0	0.133726	0	0	0	0	0	0	0	0.122282	0	0	0	0.120644	0	0	0	0	0	0	0	0.230334
ENSG00000231265	0	0	0	0	0	0	0	0.136696	0	0	0	0	0	0	0	0	0	0	0	0	0	0	0	0	0	0	0	0	0	0	0	0	0	0	0	0	0	0	0.113793	0	0	0	0	0	0	0	0	0	0
LAIR1	1.028	0.472383	0.905201	0.871367	0.406174	0.706425	0.612537	0.610329	1.78584	0.59722	1.49239	0.408433	1.08297	0.508261	0.590887	0.411861	1.0401	1.28987	1.30628	4.0649	2.09466	0.492853	0.874896	0.380539	2.04525	1.39616	1.02016	0.562503	1.83667	0.646795	1.21196	0.5636	1.24532	5.4475	1.86996	0.750891	0.972678	0.357851	3.56303	2.21336	0.345474	0.238318	1.20136	1.30756	0.892102	4.17825	14.0979	1.35658	2.47954
COL6A2	16.0456	43.7829	31.3391	44.9067	29.9626	49.8193	17.7695	55.1332	4.23312	11.7237	5.52514	24.2331	3.48985	32.1309	13.3146	9.65046	42.3111	25.1963	36.133	19.4811	12.3192	24.1896	11.0288	10.7683	86.8191	25.8217	54.4004	24.6632	74.269	14.3349	30.4385	22.7504	32.0019	12.7983	156.646	30.1126	39.578	5.56062	54.4369	26.3612	13.7669	12.6117	7.92565	8.11455	17.7154	23.5815	30.2842	8.96114	48.8156
NFAM1	0.50207	0.203713	0.382912	0.700875	0.678834	0.273532	0.337775	0.531978	0.570652	0.324548	0.693346	0.247929	0.5186	0.488942	0.546565	0.11429	0.454129	0.699963	0.542857	1.77969	1.45315	0.38616	0.203862	0.184183	1.57792	0.560753	0.554704	0.423956	0.472282	0.520503	0.751105	0.390993	0.385557	0.523553	1.11073	0.480854	0.422867	0.334606	2.18713	1.46048	0.150903	0.857272	0.670941	0.541415	0.50428	1.15945	0.58284	1.04675	1.66932
IL20RA	0	0.0326776	0	0.323228	0	0	0	20.161	0	0.00849218	0	0	0	0.0115636	0.174266	0.0127778	0	0	0.0107679	0	0.0192162	0.0296815	0	0.00755035	0.0153402	0.00696585	0.0705704	0	0.108903	0.0110365	0	0.0450794	0	0.00906859	0.0104274	0	0.199167	0.0132743	0.0666882	0	0.0109166	0	0.838022	0.0233627	0.0225516	0	1.1451	0	0
RP11-495P10.4	0	0	0	0	0	0	0	0	0.263912	0	0	0	0	0	0	0	0	0	0	0	0	0	0	0	0	0.0995423	0	0	0	0	0	0	0	0	0	0	0	0	0	0	0	0	0	0	0	0	0	0	0
TUBB3	0	0.127932	0.0603359	0.0690235	0	0.019954	0.0286148	0.0570234	0	0.0544036	0.0123031	0	0	0.0123466	0.0265811	0	0.0397542	0.0104445	0	0.0112894	0.041035	0.0211277	0.0121677	0	0.17198	0.0223127	0.0167443	0.0379564	0.142118	0.0235679	0.0294409	0.0641763	0	0.10651	0.31174	0	0.0354424	0.0283464	4.2604	0.052541	0	0.0160811	0.0137657	0	0.0240788	0.0320519	0.0746657	0	0.0333803
ENSG00000228655	0	0	0	0	0	0	0	0	0	0	0	0	0	0	0.0633769	0.260232	0	0	0	0	0	0	0.0580226	0	0	0	0	0	0.123218	0	0.0701955	0	0	0	0.0530912	0	0	0.0675858	0.113181	0	0.0555819	0	0	0	0	0	0.0445061	0	0.106117
FAM90A1	0.156917	1.11651	0	0	0.0587118	0.0870728	0.0249732	0	0.0688375	0.0633066	0.128848	0.0202944	0.0304772	0.0215507	0.092793	0.142881	0.0462598	0	0	0.0197053	0.0358126	0.0184389	0	0.0281428	0.0571782	0.0519283	0.116907	0	0.0225511	0.041137	0	0.784124	0.0818224	0.0169009	0.1749	0.0183683	0.0824848	1.97911	0.227856	0.137563	0.020345	0.168415	0.072083	0.0870809	0.105072	0.0559456	0.439852	0.0660306	0
AC004692.5	0	0	0	0	0	0	0	0	0	0	0	0	0	0	0	0	0	0	0.120123	0	0	0	0	0	0	0	0	0	0.134987	0	0	0	0	0	0	0	0	0	0	0	0	0	0	0	0	0	0	0.13175	0
ENSG00000236911	0	0	0	0	0	0	0	0	0	0	0	0	0	0	0	0	0	0	0	0	0	0	0	0	0	0	0	0	0	0	0	0	0	0	0	0	0	0	0	0	0	0	0	0	0	0	0	0	0
CTD-2012B7.1	0	0	0.179388	0	0	0	0	0	0	0	0	0	0	0	0	0	0	0	0	0	0	0	0	0	0	0	0	0	0	0	0	0	0	0	0	0	0	0	0	0	0	0	0	0	0	0	0	0	0
TFAP2E	0.212258	0.117683	0.264561	0	0.170181	1.1307	0.115819	0.317354	0.119719	0.146799	0.0995936	0.0705901	0.106009	0.224879	0.161381	0.0552204	0.160906	0.612977	0.0698021	0.114235	0.207612	0.14965	0	0.0163148	0.64637	0.0903111	0.101659	0.0512096	0.130732	0.119239	0.0893718	0.129877	0.208709	0.0195955	0.811138	0.575015	0.310816	0.430246	0.0720501	0.0797476	0	0.0325442	0.975047	0.126206	0.146189	0.129731	1.18995	0.127597	0.20266
ENSG00000276649	0.0413043	0.160304	0.166327	0.761106	0.046363	0	0.236647	0.903876	0.217436	0.0749869	0.0339157	0	0.385071	0.102108	0.0366379	0.188048	0.10959	0.0575845	0.063388	0.0622426	0.735284	0.0291212	0.100628	0.0666705	0.11288	0.451068	0.346192	0.034878	0.106847	0.0649693	0.243478	0.265371	0.0775353	0.266922	2.48604	0.0580196	0.423382	0.35164	4.02391	0.108629	0.19279	0.155157	0.303583	0.343826	0.0331888	0	0.0771863	0.0347616	0.092019
GRAMD4P2	0	0	0	0	0	0	0	0	0	0	0	0	0	0	0	0.0550946	0	0.0421779	0	0	0	0	0	0	0	0	0	0	0	0	0	0	0	0	0	0	0	0	0	0	0	0	0	0	0	0	0	0	0
TNFRSF13B	0.0747899	0.0290263	0.0250975	0.0287112	0	0.0249004	0	0.0177897	0.024607	0.0113149	0.0307057	0.0725454	0	0.0462217	0	0	0	0.0391007	0.0286942	0.0422636	0.0768105	0.0131825	0	0	0.0204392	0.0185625	0	0	0.0806122	0.338215	0.0183695	0	0.140393	0	0.0972541	0	0.147427	0	0	0.0491739	0	0	0.0515343	0.0311283	0	0.0399972	0.0698808	0	0.166619
SIT1	1.90074	0.582385	0.939974	0.537659	0.168437	0.666136	0.238816	0.0951823	0.724117	0.151349	1.47859	0.271704	0.408032	0.824351	0.931741	0.774272	1.85799	1.2901	1.11306	1.28139	1.16441	0.246861	0.284341	0.322953	0.519451	1.04283	0.726681	0.549085	2.02715	1.88827	0.589706	0.107122	1.00155	0.161622	1.52388	0.983667	1.69591	0.141946	0.475411	3.33261	0	0.563687	2.3437	0.999297	0.361726	1.33751	2.67955	0.505157	2.52586
IFNG	0.0544959	0.0423002	0.0731495	0	0	0.108862	0.0520377	0	0.0717199	0	0.17899	0.0845768	0	0.0449061	0.0966784	0.0496213	0.0481968	0.151951	0.0836326	0.0410607	1.26861	0.0768437	0	0	0.0893586	0.0811539	0.0304505	0.184069	0.0469907	0.77147	0.16062	0	0	0.0704342	0.121482	0.114825	0.0429693	0	0.172652	0.33442	0.0423937	0	0.0500675	0.181454	0.0437886	0.0582882	0.135784	0	0.0404692
CD300E	0.265362	0.0686589	0.106858	0.0814963	0.119145	0.0942391	0.0168928	0.100992	0.139693	0.0107058	0.159789	0.0686397	0.20616	0.422754	0.329536	0.144976	0.0782299	0.221974	0.0271494	0.253259	0.484501	0.1372	0.272963	0.104703	0.31909	0.219539	0.138391	0.119507	0.106781	0.111307	0.451893	0.11366	0.199252	0.274378	0.315491	0.223651	0.446367	0.100406	0.266226	0.977056	0.0275243	0.0284805	0.455091	0.206167	0.369589	0.264907	0.0991778	0.178663	0.249611
AC024162.2	0	0	0	0	0	0	0	0	0	0	0	0	0	0	0	0.139905	0	0	0	0	0	0	0	0	0	0	0	0	0	0	0	0	0	0	0	0	0	0	0	0	0	0	0	0	0	0	0.66996	0	0
EBI3	1.75762	0.521636	1.35309	2.22266	1.62473	1.20478	1.23407	2.80354	2.6533	0.844654	3.09867	0.842408	2.59042	1.57612	0.641963	0.894343	1.78306	3.45938	1.30901	1.44115	1.98208	0.510257	0.461785	0.333768	3.24934	1.87324	1.06875	1.44051	3.52145	2.15479	4.57091	0.664255	1.9408	0.9688	3.41872	1.27076	2.20107	0.244499	4.62671	7.02439	0.482575	1.94188	2.65966	2.40978	0.498453	2.7646	1.15924	4.43763	8.17686
RP11-100G15.7	0	0.0276552	0	0	0.0399921	0.0474483	0	0	0	0	0	0	0	0.0293589	0.0316034	0	0	0	0.0273388	0	0.0487882	0	0	0	0	0	0.019908	0	0	0	0.0350035	0	0	0	0	0	0.0561853	0	0	0	0	0	0.0654667	0.029658	0	0	0.0221933	0	0
ENSG00000253182	0	0	0	0	0	0	0	0	0	0	0	0	0	0	0	0	0	0	0	0	0	0	0	0	0	0	0	0	0	0	0	0	0	0	0	0	0	0	0	0	0	0	0	0	0	0	0	0	0
PPM1N	0.103269	0.200395	0.207925	0.79288	0.115916	0.32663	0.0739579	2.11248	0.169885	0.265599	0.63597	0.320543	0.571634	1.0637	0.114502	0.799268	0.22833	0.467911	3.36775	0.155619	0.424235	0.109213	0.125795	0.763993	0.211666	0.128154	0.216387	0.0218004	0.244878	0.243654	5.52942	0.304095	1.13081	0.100104	0.211022	0.235723	1.68959	0.537269	2.16752	0.497923	0.381593	0.595739	0.094877	0.0429816	0.186702	1.38069	0.385961	0.478009	1.89804
LARP1BP1	0	0.0379114	0	0	0.0548236	0.0325225	0	0	0	0	0	0	0.113835	0	0	0	0	0	0	0	0	0	0	0	0	0	0.0272912	0.0412428	0	0	0	0	0	0	0	0	0	0	0	0	0	0	0	0	0	0	0.212968	0	0
LHFPL5	0	0.0174001	0	0	0	0	0	0	0	0	0	0	0	0	0	0	0	0	0	0	0	0	0	0.0120612	0	0	0	0	0.0193295	0	0	0	0	0	0	0	0	0	0.514895	0	0	0	0	0	0	0	0.0279271	0.0188659	0
PTCRA	0.170486	0.044111	0	0	0	0	0	0.0540697	0.0747901	0.171952	0	0.0440987	0.331126	0.234142	0.151226	0.206982	0.05026	0.039614	0.0872127	0.171274	0.155638	0.200333	0.0461498	0.0611527	0.0931839	0.0564186	0.095262	0	0.0490022	0.134083	0.279159	0.182556	0.0355591	0.110174	0.0422275	0.0399133	0	0.107512	0.0900215	0.548014	0	0.121985	0.261054	0.141916	0	0.0607834	0.0353991	0.047827	0.0844033
TREML5P	0	0.0894473	0	0	0	0	0	0	0	0	0	0	0	0	0	0	0	0	0	0	0	0	0	0	0	0	0	0	0	0	0	0	0	0	0	0	0	0	0	0	0	0	0	0	0	0	0	0	0
BECN1P1	0.251234	0	0	0	0	0	0	0.0478073	0	0	0	0	0	0	0	0	0	0	0	0	0	0	0	0	0	0	0	0	0.12998	0.0790353	0	0	0	0.0324712	0	0	0	0.0475301	0	0	0	0	0.138491	0	0	0.16123	0.469487	0.0422876	0.0373138
CCDC136	0.0965391	0.0749345	0.0143982	0.0823568	0	0.0499979	0	0.418438	0.0564672	0.00649127	0.0176156	0.0249712	0	0.0530339	0	0.00976709	0.0094867	0.0224317	0.041154	0.0242462	0.0734425	0.0151253	0.0348435	0.0173141	0.0469031	0.0425966	0.0539428	0.0271731	0.147989	0.0421807	0.0105384	0.022972	0.00671187	0.0277275	0.087676	0.0376687	0.0422888	0.0710263	0.628696	0.0846319	0.00834447	0.00575625	0.108404	0.00892903	0.0861902	0.0573651	0.04009	0.0180549	0.0398283
ENSG00000272619	0	0	0	0	0	0	0	0.190796	0	0	0	0	0	0	0	0	0	0	0	0	0	0	0	0	0	0	0	0	0	0	0	0	0	0	0	0	0	0	0	0	0	0	0	0	0	0	0	0	0
RP11-629F19.1	0	0	0	0	0	0	0	0	0	0	0	0	0	0	0	0	0	0	0	0	0	0	0	0	0	0	0	0	0	0	0	0	0	0	0	0	0	0	0	0	0	0	0	0	0	0	0	0	0
RHOH	0.703135	0.109156	0.161797	0.339338	0.056375	0.113706	0.0479584	0.353613	0.0528782	0.0303935	0.453638	0.0857415	0.128762	0.132435	0.338579	0.201219	0.21321	0.28008	0.36226	0.385988	0.72901	0.17705	0.203931	0.0108091	0.406279	0.234349	0.157155	0.110266	0.866141	0.442397	0.13816	0.129071	0.307978	0.0519303	0.686682	0.380965	1.16427	0.0475085	1.23316	0.634022	1.84413	0.0916365	1.67037	0.351183	0.0242136	0.461983	0.506815	0.0507221	0.671343
RELT	0.241482	0.374881	0.591907	0.741622	0.565684	0.580267	1.02261	0.909042	0.262534	0.343099	0.431055	0.309598	0.636232	0.337414	0.54947	0.305922	0.519995	0.827019	0.950649	0.878096	1.15017	0.444143	0.187578	0.220312	1.03869	0.927686	0.445862	0.292568	0.561301	0.941335	0.567327	0.202365	0.361329	1.00417	2.07523	0.420321	0.455317	0.337673	1.23906	0.699521	0.147017	0.270444	0.598054	0.550605	0.244654	1.10052	1.49767	0.512495	0.795276
TMCO5A	0	0	0	0	0.0560928	0.00831887	0	0	0	0.00756032	0.0512917	0	0	0	0	0	0	0	0.00958634	0.0376525	0	0	0	0	0	0	0	0	0	0	0	0	0	0	0.00928321	0	0	0	0.0197902	0	0	0	0	0	0	0.0133625	0.00778207	0	0
F3	0.646444	0.609299	0.21693	0.531781	0.285064	0.599557	0.396826	4.37132	0.0911528	0.614745	1.06162	0.931609	1.1569	0.722934	0.245748	0.336355	0.571723	0.547183	0.566898	0.0695818	0.252918	0.32555	0.0374977	0.0869538	1.09785	0.34381	1.85766	1.20871	2.20975	0.308678	0.317552	0.395549	0.664529	1.13391	2.33313	0.34052	0.491509	0.109195	11.0631	0.344075	0.538806	0.210621	1.03935	0.557333	2.96818	1.67919	1.52441	0.213733	2.12596
ENSG00000249279	0	0	0.043	0	0	0	0	0	0	0	0	0	0	0	0	0	0	0.0446614	0	0	0	0	0	0.0344722	0	0	0	0	0	0	0	0	0	0	0.0476078	0	0	0	0	0	0	0	0	0	0.0514812	0	0.0798188	0	0
UCHL1	0.319954	2.64156	0.370908	0.312652	0.163246	0.329259	0.333297	0.442794	1.26324	0.0704084	0.238837	0.361138	0.101689	0.14381	6.94038	0.10594	0.540218	0.243308	0.312468	0.153411	0.278811	0.38964	0.330693	0.1252	1.36724	0.54866	0.633856	0.0491227	0.376214	0.0915036	0.314342	0.591775	0.509608	0.0939843	1.27519	0.18386	0.275214	0.632825	1.01367	0.484484	0.135764	0.0780448	0.267231	0.314762	0.0934873	0.186665	0.199302	0.220314	0.345602
ENSG00000250742	11.4425	0.715056	0.390487	0.446712	0.653078	0.32285	0.324086	0.738097	0.191428	0.293411	0.159248	0.601984	0.28251	0.599295	1.07519	0.0882962	0.771853	0.777349	0.297632	0.84023	0.39836	0.683679	0.748105	0.0782612	7.89724	0.409148	0.839846	0.368474	1.25423	0.419453	12.4326	0.623012	0.940486	0.34466	2.26974	0.340532	2.79077	2.29318	2.68815	0.340039	0.188589	0.286206	0.17818	0.2018	0.935009	0.829745	0.966454	0.367244	0.684104
STX11	1.3096	0.722266	0.878933	1.00549	1.39262	0.298326	0.756897	0.655799	0.136067	0.375402	1.04704	0.534862	0.642585	0.39758	0.305697	0.125522	0.914388	1.00898	1.40156	2.96021	1.41577	0.70464	0.083961	0.185427	1.9967	0.752717	1.48278	0.698429	0.267452	1.32811	1.9638	0.590449	2.32896	1.80397	1.28042	1.59753	0.896733	0.130399	3.84877	1.9336	2.89545	1.59049	0.823228	0.573757	0.775371	1.06898	1.975	0.348049	1.25404
ENSG00000271781	2.43351	0.390809	1.85851	1.03084	2.1664	2.62619	1.68271	1.996	0.773051	2.13281	0.620131	0	0.880102	0.622327	1.19094	6.57109	0.81636	0.467956	2.76876	0.885167	1.95344	1.77489	0.477017	1.62538	1.28423	0.333234	0.140665	0.354292	11.0707	1.12193	0.494652	0.0898549	2.52034	0.271141	4.24005	0.530429	0.26466	1.58754	1.66159	1.69197	0.195836	0.270187	0.539666	0.838222	0.60684	0.448768	1.51585	0.423731	1.12168
RP11-61G24.1	0	0	0	0	0	0	0	0	0	0	0	0	0	0	0	0	0	0	0	0	0	0	0	0	0	0	0	0	0	0	0	0	0	0	0	0	0	0	0	0	0	0	0	0	0	0	0	0	0
ENSG00000261121	0	0.0938891	0.0405905	0	0	0	0	0	0	0	0.074491	0	0	0	0	0	0.0802329	0	0	0.136707	0	0	0	0	0.0330566	0	0.0168969	0	0	0	0	0	0	0.117251	0.20223	0.0212386	0	0.0286047	0	0	0	0.0162276	0.0277823	0	0	0	0.113019	0	0
RNF183	0.0182052	0.014131	0.0610917	0.0279552	0.0613044	0.0606118	0.0695358	0.121249	0.0239591	0.121187	0.0149486	0	0.297015	0.0600062	0	0.149191	0	0.0253808	1.01976	0.0274339	0.0249294	0.0128354	0	0.00979517	0	0.00903689	0.0610346	0	0.361052	0.0143178	0.089429	0.389881	0.136697	0.0117648	0.148804	0.0255726	0.028709	0.0172209	0.057677	0	0.0141622	0.019539	0.167258	0	0.16091	0	0.0567007	0	0
ENSG00000237571	0	0	0	0	0	0	0	0	0	0	0	0	0	0	0	0	0	0	0	0	0	0	0	0	0	0	0	0	0	0	0	0	0	0	0	0	0	0	0	0	0	0	0	0	0	0	0	0	0
ENSG00000235480	0	0.117095	0	0	0.16933	0.10045	0	0	0	0	0	0.117062	0	0	0	0	0	0	0	0	0	0	0	0	0	0.0748829	0	0	0	1.18643	0	0	0	0	0	0	0	0	0	0	0	0	0	0	0	0	0.0939685	0.126959	0.112026
ENSG00000222032	0	0	0.0823439	0	0	0	0	0	0	0	0	0	0	0	0	0	0	0	0	0	0	0	0	0	0.536482	0	0	0	0	0	0	0	0	0	0.0911677	0	0	0	0.777413	0	0	0	0	0	0	0	0	0	0
HOXB13	0	0	0	0	0	0.0127482	0	0.0728623	0	0	0	0	0	0	0.492483	0	0	0.293603	0	0.0144251	0	0.0539923	0	0.0412035	0.742962	0	0	0.0323328	0.72637	0	0	0.0205005	0.0119795	0.915543	0.0284521	0	0.0905738	2.46295	0.0151637	0	0	0	0.0879467	0	0.0615339	0	0.965975	0	0
OR8G3P	0	0	0	0	0.242688	0	0	0	0.0948478	0	0.0591776	0	0.503916	0	0	0	0	0	0	0	0	0	0	0	0	0	0	0	0	0.0566806	0	0	0	0	0	0.0506176	0	0	0	0	0	0	0	0	0	0	0	0	0
KCNIP4-IT1	0	0	0	0	0	0	0	0	0	0	0.00553438	0	0	0	0	0	0	0	0	0	0	0	0	0	0	0	0	0	0	0	0	0	0	0	0	0	0	0	0.0053384	0	0	0	0	0	0	0	0	0	0
ENSG00000249483	0	0.0857265	0	0	0	0.147082	0	0	0	0	0.0906865	0	0	0	0	0	0.195353	0.076987	0	0	0	0	0	0	0	0.0548228	0	0	0	0	0	0	0	0	0	0	0	0	0	0	0	0	0.101468	0	0	0.118128	0.0687955	0	0
OR51M1	0	0	0	0	0	0	0	0	0	0	0	0	0	0	0	0	0	0	0	0	0	0	0	0	0	0	0	0	0	0	0	0	0	0	0	0	0	0	0	0	0	0	0	0	0	0	0.0842938	0	0
CD33	0.577666	0.146589	0.372787	0.392346	0.299268	0.281093	0.222765	0.391076	0.336261	0.302521	0.592915	0.155168	0.440157	0.302085	0.325179	0.161844	0.157198	0.758892	0.144912	0.636135	0.410727	0.407278	0.18945	0.137473	1.09294	0.441151	0.186219	0.309559	0.459793	0.122316	0.665759	0.273595	0.389264	0.236907	0.404479	0.429127	0.464241	0.0945749	0.783089	1.05179	0.129629	0.399417	0.602167	0.471614	0.419535	0.522809	0.657386	0.682497	1.18795
DMRTC2	0	0	0	0	0	0	0	0.0186348	0	0	0	0	0	0	0	0.0356676	0	0	0	0	0	0	0	0	0	0	0	0	0.0168884	0	0	0	0	0	0	0.0137559	0	0	0	0	0	0	0	0.0163036	0	0	0.0244002	0	0
SOHLH2	0	2.72842	0.327655	0	0.153438	0.0130033	0	0	0	0	0	0.303073	0	0	0	0	0.0863544	0.0136126	0	0	0	0	0	0.0840557	0	0.00969358	0	0	0	0.0153583	0	0	0	0	0	0	0	0.0184723	0	0	0.0607656	0	0	0	0	0	0.060821	0	0
GBP6	0	0.0689945	0.014914	0	0	0.0147968	0	0	0.087735	0	1.29551	0.0344876	0	0.0183112	0.0197111	0.0202339	0.0786123	0.0309804	0.0170513	0.0167432	0.091288	0.0156672	0	0	0	0.0661838	0.0124167	0.0375286	0	0.0349533	0.0654954	0.0237949	0.0834277	0	0	0	0.0175215	0.147141	0.0528014	0.0584424	0.0172868	0.0119249	0.0204159	0	0.0535666	0.095072	0.166104	0	0.033004
COL16A1	0.243476	1.52303	1.74463	2.15528	0.225067	0.729563	0.328226	4.33332	0.254459	0.303351	0.064681	0.466783	0.00834514	0.649102	0.0952808	0.0847669	1.501	0.404337	1.10997	0.140286	0.470691	0.479641	0.0930464	0.0192648	1.78482	0.568751	1.7526	0.622833	1.80923	0.0901117	1.18899	0.214706	0.721418	0.0138832	5.14023	0.331949	0.671923	0.1558	6.09159	0.464559	0.122557	0.39966	0.243429	0.190753	0.362506	1.32508	0.356855	0.0843745	1.26034
RP11-656G20.1	0.0217769	0	0	0	0.048888	0.0290014	0	0.0207196	0.0573194	0	0.0178814	0.0168987	0	0	0.0193167	0.019829	0	0.0151802	0	0.0164081	0	0	0	0	0	0.0648592	0.0121682	0	0.0187778	0	0	0.0233187	0	0	0.0161817	0.0152949	0.0171708	0	0	0	0	0.0116862	0	0.0181276	0	0.0232923	0	0	0.0323435
CCDC89	0	0.0729768	0.126198	0	0	0.0626036	0	0.0447262	0	0	0.0385996	0.182391	0	0	0.0416977	0	0.0831497	0	0	0	0	0.0662859	0.0381749	0	0.179856	0.0233346	0.157601	0	0.0810689	0	0	0	0.0882431	0	0.104791	0.0330161	0.148262	0	0.148931	0.0824209	0.146276	0	0.0431885	0	0.0755446	0	0.117128	0	0
RP11-65B23.3	0	0	0	0	0	0	0	0	0	0	0	0	0	0	0	0	0	0.0641736	0	0	0	0	0	0	0	0	0	0	0	0	0	0	0	0	0	0	0	0	0	0	0	0	0	0	0	0	0.0573455	0	0
ENSG00000259708	0	0	0	0	0	0	0	0	0	0	0	0	0	0	0	0	0	0	0	0	0	0	0	0	0	0	0	0	0	0	0	0	0	0	0	0	0	0	0	0	0	0	0	0	0	0	0	0	0
ENSG00000261218	0	0.0266399	0	0	0	0.0685597	0	0	0	0	0.0563626	0	0	0.0565622	0.0608864	0.0312507	0.0607071	0.0478481	0	0	0.0939942	0.0483949	0.0278712	0	0.0375177	0	0	0	0	0.0809765	0	0.0735008	0.0214752	0	0.0765073	0	0	0.032465	0.0543667	0.0300875	0	0.0184176	0	0	0	0	0.0213786	0.0577683	0.0509736
ENSG00000251009	0	0.135227	0	0	0	0	0	0.0828785	0	0	0	0	0	0	0	0	0	0	0	0	0	0	0	0	0	0	0	0	0	0	0	0	0.0545053	0	0	0	0	0	0	0	0	0	0	0	0	0	0	0	0
ENSG00000258843	0	0	0	0	0	0	0	0	0	0	0	0	0	0	0	0	0	0	0	0	0	0	0	0	0	0	0	0	0	0	0	0	0	0	0	0	0	0	0	0	0	0	0	0	0	0	0	0	0
ENSG00000273297	0.771173	2.43712	1.07211	0.16917	0.494641	3.52118	1.78837	0.838552	2.10231	0.0333344	2.12583	0.0854892	0	0.590078	0	0	1.94867	0.230386	1.43709	0.124511	2.86632	0.116509	0.134198	0.059275	1.2043	0.0820294	0	0.0930273	0.332483	0.129966	0.0541175	0.943738	0.654878	1.70866	3.9703	0.928507	0.0434328	2.55317	0.567173	1.73843	0.171404	0.0295599	0.202431	0	0.265566	4.47769	0.137249	0.139075	2.57707
ENSG00000280473	0	0	0	0	0	0	0	0	0	0	0	0	0	0	0	0	0	0	0	0	0	0	0	0	0	0	0	0	0	0	0	0	0	0	0	0	0	0	0	0	0	0	0	0	0	0	0	0	0
CLIC6	0	1.06781	0.0230819	0	0	0.0343509	0	0.016361	0.520508	0.0728435	0.0141198	0.0667192	0.0200392	0.155868	0.0305063	0.0313154	0.106458	0	0	0.0388694	0	0.0727427	0.0418935	0.0185042	0.0939886	0.102431	0.0768677	0	0.163104	0.0540962	0.0168942	0.0552398	0.0215197	0.0555628	0.65166	0.0120774	0.0949109	0.0325322	0.435835	0.0301498	0.0133771	0.00922789	0.031597	0.100199	0.0138172	0.0551775	1.23181	0.159192	0.0127698
ENSG00000230923	0	0	0	0	0	0	0	0	0	0	0	0	0	0	0	0	0	0	0	0	0	0	0	0	0	0	0	0	0	0	0	0	0	0	0	0	0	0	0	0	0	0	0	0	0	0	0.0125026	0	0
IVL	0.0308295	0	0	0	0	0	0	0	0	0	0	0	0.0359271	0	0	0.0280719	0	0	0	0	0	0.0217361	0	0	0	0	0	0	0.106335	0	0.151444	0	0	0	0	0	0.0243087	0	0	0	0	0	0	0	0	0.0659499	0	0	0
ENSG00000227213	0	0	0	0	0	0	0	0.145851	0	0	0	0	0	0	0	0	0	0	0	0	0	0	0	0	0	0	0	0	0	0	0.150604	0.164146	0	0	0.113907	0	0	0	0.242829	0	0	0	0	0	0	0	0	0	0.113837
CXCL14	0	0.495651	0.180448	0	0	0.447576	0.0641842	0.191859	0.132691	0.0406765	0.110385	0.208637	0.0391651	0.69235	0	0.0612038	0.0891702	1.61649	0.0515769	0.050645	0.0460215	1.04258	0	0.216991	0.165325	0.0166828	1.55866	0.0283792	1.01428	0.0264318	0.198111	0.215925	0.126176	0.0217187	0.524433	0.0708133	0.662488	0.63582	0.346047	0.589257	0.130723	5.86146	0	0.195833	0	0.431362	0.272152	0	1.99662
LOC401913	0	0	0.0784296	0	0	0	0	0	0	0	0	0.0906818	0	0	0	0	0	0.0814598	0	0	0	0.0823905	0	0	0	0.0580079	0	0.0986777	0	0.0919064	0	0	0	0.151037	0	0	0.184284	0	0	0	0	0.0627107	0	0	0.0938987	0	0.145585	0	0
CLECL1	0.424251	0.119748	0.36239	0	0	0.0256817	0.073657	0.0733916	0	0.0233399	0.475037	0.0598574	0.179782	0.095344	0.068422	0.0351184	0.272882	0.349506	0.0887837	0.494017	0.264069	0.0271922	0.0313207	0.0415028	0.0843221	0.210595	0.0431013	0.097703	0.19954	0.21233	0.0757834	0	0.0241331	0.0747724	0.257929	0	0.152053	0.036483	0.79424	0.473357	0	0.0827883	0.42521	0.0963152	0.0619808	0.412522	0.21622	0.064918	0.429618
CCL8	1.00011	0.449435	1.27179	1.21243	0.354506	0.2103	0.100526	0.150246	1.24694	1.84754	0.172887	3.06348	0.368047	0.910871	0.700363	0.287575	1.11728	0.733849	0.727026	0.674229	1.80199	2.52359	0.512954	1.1895	0.374016	1.33257	3.38239	2.04461	0.953154	2.0285	1.70657	2.48002	1.77858	0.204097	1.1734	0.961212	2.86378	0.0995833	0.208456	4.29151	0.163792	0.847415	0.918844	0.39435	3.46822	1.18231	1.57384	1.55049	1.17268
ENSG00000260761	0	0.476737	0	0	2.85612	0	0.125675	0	0.404153	0	0	0	0	0	0	0	0.349196	0	0	0	0	0	0	0	0	0	0	0	0	2.13918	0	0.0469764	0	0	0	0	0	0	0	0	0	0.0470848	0	0	0	0	0.109309	0	0
RP1-229K20.8	0	0	0	0	0	0	0	0	0	0	0	0	0	0	0	0	0	0	0	0	0	0	0	0	0	0	0	0	0	0	0	0	0	0	0	0	0	0	0	0	0	0	0	0	0	0	0	0	0
RP5-891H21.5	0	0	0	0.128046	0	0	0	0	0	0	0	0	0	0	0	0	0	0	0	0	0	0	0	0	0.0455774	0	0	0	0	0	0	0	0	0	0	0	0	0	0	0	0	0	0	0	0	0	0.103885	0	0
ENSG00000260520	0	0	0.101246	0	0	0	0	0.143531	0	0	0	0	0	0	0	0	0.53367	0	0	0	0	0	0	0	0	0.0748829	0	0	0.130079	0.118643	0	0	0	0	0.112095	0	0	0	0	0	0	0.0809538	0	0	0	0	0	0	0
RETN	0.382938	0.19816	0.257008	0	0	0	0	0	0	0	0	0.0990524	0	0	0	0	0	0.622854	0	0	0	0.179992	0	0	0	0	0.142649	0.323359	0	0	0	0	0.239614	0	0	0	0.503236	0	0.101101	0.111902	0.198598	0.0684994	0	0.106255	0	0	0	0	0
NXPH2	0.12619	0.0489749	0.042346	0	0	0	0	0.66035	0	0	0	0	0	0	0	0	0	0	0	0	0	0	0	0	0	0	0	0	0	0	0	0	0	0	0.0937675	0	0	0	0	0	0	0	0.231872	0	0	0	0	0	0
RP1-228H13.2	0	0	0	0	0	0	0	0	0	0	0	0	0	0	0	0	0	0	0	0	0	0	0	0	0	0	0	0	0	0	0	0	0	0	0	0	0	0	0	0	0	0	0	0	0	0	0	0	0
ENSG00000235052	0.145561	0.677916	0.195386	0	0	0.290777	0	0	0.191567	0	0.717139	0.112955	0	0	0	0.662706	0	0	0	0	0	0.102627	0	0	0.238681	0.0722554	0.0813348	0	0	0.11448	0.143008	0.311734	0	0	0.216323	0.204468	0.229546	0	3.34343	0	0	0	0	0.121168	0	0.311382	0.0906713	0	0.108095
ENSG00000224713	0.0255292	0.118896	0.0171339	0.0392018	0	0.0169993	0.0487553	0	0	0.0308985	0	0	0.0297504	0.0420736	0	0	0	0.177958	0.058768	0.0192354	0.0349586	0.251988	0	0	0.0279074	0.025345	0.114119	0	0.0660399	0	0	0	0.0319485	0	0.208669	0.0717212	0.0805178	0.0241489	0.0808809	0.0447609	0	0.0547995	0	0.0425022	0.0205133	0	0.0159024	0.0429707	0.0189583
FAM26F	2.77956	0.94931	2.57438	2.90238	0.748797	1.73979	0.477753	0.740493	3.2191	0.403699	2.92141	0.345107	1.81393	3.29823	1.92312	0.860519	2.45828	5.15393	2.04753	2.97391	4.33909	4.27216	2.07666	0.448658	6.38083	2.12482	1.27356	1.97157	2.87611	3.41023	7.75548	0.357162	3.2002	1.5807	2.64371	1.21037	1.13966	0.368099	5.76801	17.3983	0.648688	3.10255	2.3494	5.32167	1.07205	2.79461	2.25084	1.82464	5.90342
OPRM1	0	0.00633333	0	0	0	0	0	0	0	0	0	0	0	0	0	0	0	0	0	0	0	0	0	0	0	0	0	0	0	0	0	0	0	0	0	0	0	0	0	0	0	0	0.00749628	0.00679199	0.00655617	0	0	0	0
MZB1	0.233615	0.0680004	0.235185	0.0448415	0.0983351	0.175004	0.0278847	0.472331	0.192157	0.123703	0.911174	0.906419	0.102091	0.553454	0.440348	0.0531797	0.0258265	0.183204	0.246482	0.110013	1.6395	0.205886	0.142287	0.0471357	0.0957666	0.159452	0.440561	2.21927	0.830947	24.2756	0.086069	0.0938081	0.69435	0.0188713	1.32364	0.0615294	0.138152	0.0552461	2.05849	2.15041	0.0227169	0.235062	0.295119	0.753558	0.0938574	0.937022	0.381992	0.0245763	1.01923
ENSG00000233607	0	0	0	0	0	0	0	0	0	0	0	0	0	0	0	0	0	0	0	0	0	0.082828	0.0954035	0	0	0	0	0	0	0	0	0	0	0	0	0	0	0	0	0	0	0	0	0	0	0	0	0	0
RPP25	0.87079	1.63909	1.68023	1.87202	0.928567	45.1984	1.26805	1.94701	1.31791	0.685056	1.44792	0.861551	1.85196	1.45305	0.965516	1.74438	1.52102	26.071	10.9081	1.50905	2.56371	1.74974	1.21984	0.948759	2.48686	7.0025	0.77851	0.882371	2.89083	0.890307	1.30466	1.11893	0.967153	3.91101	3.49409	0.963261	1.57919	1.02964	1.6208	1.10691	0.474187	1.2617	1.06004	1.12354	0.962085	3.28314	1.34249	2.07032	14.1133
ENSG00000228437	0	0	0	0	0.0545427	0	0.0463996	0	0	0	0	0	0	0	0	0	0	0	0	0	0	0	0	0	0	0	0	0	0	0	0	0	0	0	0	0	0	0	0	0	0	0	0	0	0	0	0	0	0
ENSG00000236064	0	0	0	0.0487678	0	0	0	0	0	0	0	0	0	0	0	0	0	0	0	0	0	0	0	0	0	0	0	0	0	0	0	0	0	0	0	0	0	0	0.0503087	0	0.024706	0	0	0	0	0	0	0	0
PAFAH1B3	8.13913	16.5566	25.4919	6.0336	15.3841	28.9671	17.018	26.5253	6.21764	9.65278	22.3925	11.071	21.5319	21.3926	27.8826	53.3684	18.0372	27.1289	14.8597	5.81534	57.5844	14.0163	8.509	8.65774	63.5084	19.4115	4.46946	0.829477	10.6886	40.7984	10.478	6.16086	7.84416	15.6584	58.1155	11.7615	62.9588	39.3361	67.0217	16.8949	4.62136	4.29243	35.5407	5.4513	4.73583	26.4668	66.2878	78.3799	17.3684
MAL	0.455566	0.0353615	0.122301	0.209866	0	0.0910051	0	0.173379	0.179866	0.027569	0.486296	1.1666	0	0.0750798	0.444508	0.207408	0.161163	0.190539	0.139828	0.102976	0.499066	0.0321193	0.0739917	0.0245114	0.0498004	0.11307	0.0763665	0.0384687	1.84628	0.071658	0.0447575	0	0.427588	0	0.304664	0.415953	0.179604	3.3182	0.288662	0.479252	0	0.0488945	0.460401	0.379223	0.0732114	0.243634	0.454041	0.0766808	0.608955
MCOLN3	3.7282	0.0077792	0.0538101	0	0.0224989	0.106775	0.229679	0.2956	0.0131896	0	0.106981	0.00777703	0.0817542	0.00825844	0.044449	0.903433	0.0177272	0.0628752	0.038451	0.0755125	0.0274475	0.0141319	0.0162775	0.0269615	0.164335	5.17883	0.0335999	0	0.181478	0	0.00984623	0	0.0313552	12.1436	13.5238	0	0	0.0284405	0.11113	0	0	0	0.488005	0.0166851	0	0.0107195	1.21735	0.160256	0.014885
CHST2	1.14441	0.933282	1.4778	1.55712	0.7805	0.819913	0.636309	3.45952	0.476619	0.552288	0.559062	1.40515	0.33763	0.501357	2.12019	0.527619	1.87052	1.83784	1.32277	0.753126	0.733963	1.61372	0.811721	0.389712	4.37065	1.0211	2.95447	0.697248	1.18666	1.11652	2.16328	1.45811	0.969891	0.589775	3.64907	0.763075	2.04458	0.739963	1.64074	3.58126	0.72123	0.443108	0.851781	1.18175	1.3386	1.47196	1.20916	0.829029	1.10804
LINC01587	1.48263	0.398363	0.803702	1.66372	0.256032	0.0379709	0	0.379789	0	1.48387	0.0936471	0	0.0664529	0	1.16338	0.15577	3.12683	0	0	0	0	0	0	0.552266	1.74541	0	0	0	1.86848	0	0	0	0.0713627	0	0.635589	0	2.11325	0.0539409	0.316158	0	0	0	0	0	0	0.548931	0.461769	0	2.24437
ENSG00000277215	0	0	0.0264223	0.0604536	0.132572	0	0	0	0.0518119	0	0	0	0	0	0	0	0	0	0	0	0	0	0	0.0211822	0	0	0	0	0	0.0309625	0	0	0	0	0.0292537	0	0	0	0	0	0	0	0	0	0	0	1.29973	0	0
ENSG00000268734	0	0	0	0	0	0	0	0	0.233569	0	0.145729	0.20658	0.103411	0	0	0	0	0.0618572	0.0680912	0.0668609	0	0.0625639	0.288251	0	0.145506	0.0440488	0	0.149863	0	0	0.348725	5.03608	0	0	0	0.0623246	0	0.0839402	0.140568	2.56717	0	0.19048	0.081527	0.29547	0	0.0949131	0	0.0746817	0.0658977
HES2	0.0368278	0.00952869	0.00823896	0.0942526	0.0413382	0.0408712	0.0468888	0.805916	0.516988	0.0148578	0	0.0381041	0	0.0910414	0.0108891	0.167668	0.119427	0.0684582	0.00941969	0.0277484	0.0504304	0.0259651	0.00996911	0.01321	0.0738072	0.054843	0.0548751	0.020732	0.0635117	0.0386187	0.0482424	0.0394351	0.56842	0.0158663	0.538188	0.0344877	0.0967941	0.0348366	1.3904	0.0215236	0.00954976	0.118579	0	0.08175	0.0197279	0.0262604	0.107055	0.0206628	0.0820462
EMILIN2	0.505427	0.448362	0.443057	0.823634	1.3778	3.55783	0.689469	0.471075	2.49779	0.53058	0.86391	0.272144	0.516876	0.220993	1.32668	0.159667	0.383148	9.03813	0.641105	2.81341	0.564988	0.247261	0.167531	0.382939	3.25868	1.26469	0.783848	0.966812	1.52092	0.470515	0.942452	0.695842	0.30335	0.626585	3.37242	0.391207	1.2525	0.4781	4.48521	1.5282	0.184556	0.166059	2.53974	0.669731	0.663055	1.41218	0.48189	1.25006	1.46304
ENSG00000259692	0.259619	0.134346	0.696971	0	2.33133	0.115249	0	0.164677	0.113891	0	0	0.80585	0	0	0	0.866788	0	0	0	0	0	0	0	0	0	0	0	0.0730755	0	0.204183	0	0	0	0	0	0	0.0682354	0.0818608	0	0	0	0	0	0	0.0695365	0	0.700782	0	0.0642653
ENSG00000232759	0.0272928	0.0211849	0	0	0	0.0363472	0	0.0259677	0.0359189	0	0.0224106	0.105895	0.0636111	0	0.0242094	0	0	0.0190251	0.0209425	0	0.0373735	0.0577276	0.022164	0	0.104423	0.0135479	0.0610011	0.0230464	0.047068	0.04293	0.026814	0.029225	0.0341555	0.0176375	0.223083	0.0575067	0.04304	0	0	0	0.0212317	0.0292925	0	0	0	0	0.170009	0	0.0608037
LILRB1	0.657543	0.139197	0.545617	0.734328	0.348908	0.334352	0.136993	0.352622	0.660825	0.238751	0.608638	0.296872	0.376167	0.394061	0.869583	0.283035	0.253762	0.816711	0.339426	0.954839	0.916782	0.547885	0.291262	0.15438	1.15007	0.421351	0.507698	0.353335	0.3505	0.225661	1.65613	0.192026	0.50869	0.239504	0.879476	0.554186	0.659863	0.147016	1.17417	1.49875	0.111604	0.814787	0.845755	0.617016	0.288191	0.626577	0.498954	0.452771	0.967719
FGD2	0.6855	0.187499	0.420636	0.370927	0.271141	0.417333	0.311704	0.285734	0.532704	0.244951	0.675453	0.263438	0.623861	0.408859	0.451698	0.148615	0.155897	0.94659	0.410784	0.934619	0.822475	0.575364	0.201467	0.0772784	0.881387	0.495831	0.525304	0.358334	0.551686	0.256727	0.981349	0.139816	0.739401	0.261577	0.727673	0.522725	0.3346	0.172917	1.04969	1.65404	0.101575	0.357353	0.64779	0.983649	0.377701	0.509751	0.593738	0.53296	1.20235
DOCK2	0.592183	0.163878	0.286849	0.640489	0.341025	0.178301	0.157348	1.04847	0.33207	0.199438	0.655384	0.211783	0.318046	0.263082	0.593796	0.131287	0.25959	0.524073	1.5173	1.41616	0.676934	0.319489	0.112908	0.0886596	1.13989	0.570016	0.316505	0.334815	0.506187	0.218693	0.930872	0.341867	0.621868	0.319462	1.16704	0.535266	0.686182	0.0925491	2.27175	1.17371	0.136199	0.309496	0.68126	0.600108	0.508933	0.73804	0.574163	0.39437	1.17015
ANTXRLP1	0.0362909	0.0281693	0	0.055727	0	0	0	0.0345289	0	0	0	0	0	0	0.0321909	0	0.0641921	0	0	0.0273439	0	0	0	0	0	0.0180145	0	0	0.0938786	0	0	0	0.0227081	0.0234524	0.0269665	0.0509773	0.0286149	0	0.0287439	0	0	0	0	0	0.0291605	0.116449	0.0678176	0	0.02695
CCDC169	0	0	0	0	0.0505864	0	0	0	0	0	0	0	0	0	0	0	0.00664295	0	0	0	0	0	0	0	0.00410542	0	0	0	0	0.0177219	0	0	0	0	0.0167438	0	0	0	0.00594914	0	0.520037	0.00403074	0	0	0	0	0.0093575	0	0
ENSG00000224000	0	0	0	0	0	0	0	0	0	0	0	0	0	0	0	0	0	0	0	0	0	0	0.0819194	0	0	0	0	0	0	0	0	0	0	0	0	0	0	0	0	0	0	0	0	0	0	0.107895	0.0628361	0	0
ENSG00000255007	0	0	0	0.575846	0	0	0.179045	0	0	0	0	0	0	0	1.49688	0.170731	0	0	5.89893	0	0	0	0	0	0.204969	0	0	0	0.16168	0	0	0	0	0	0	0	0	0	0	0	0	0.100621	0	0	0	0	0	0	0.974691
SLC1A7	0.0982075	0.352562	0.189496	0.37701	2.70076	1.5858	0.058611	67.9539	0.0323117	0.0520022	0.51408	0.209573	0.20028	0.303471	0.500897	0.0447115	0.412565	0.0427864	0.226072	0.0277484	0.0168101	0.121171	0.0797529	0.01321	4.89811	1.46858	2.0098	0.134758	1.86301	0.00965467	0.0603029	0.223466	0.476244	3.35571	0.656771	0.103463	0.280703	0.348366	0.359753	0.161427	0.038199	0.144929	0.135341	1.7985	0.00986397	0.315125	0.137642	0.103314	1.82325
RP11-746M1.8	0	0	0	0	0	0	0	0	0	0	0	0	0	0	0	0	0	0	0	0	0	0	0	0	0	0	0	0	0	0	0	0	0	0	0	0	0	0	0	0	0	0	0	0	0	0	0	0	0
KIAA0226L	0.0978516	0.101271	0.16783	0.28382	0.12204	0.065157	0.0726737	0.155168	0.157396	0.197386	0.116058	0.0337476	0.190052	0.134387	0.221814	0.0890989	0.144235	0.303156	0.175197	0.286719	0.357317	0.191637	0.0794638	0.0760477	0.261474	0.167306	0.127578	0.0642658	0.225001	0.0427542	0.288405	0.128064	0.312944	0.0562089	0.912916	0.229085	0.0857274	0.246829	0.258342	0.324067	0.093037	0.163366	0.219756	0.171958	0.218405	0.244209	1.22582	0.265356	0.524807
ENSG00000229967	0	0	0	0	0	0	0	0	0	0	0	0	0.0486791	0	0	0	0	0	0	0	0	0	0	0	0	0	0	0	0	0	0	0	0	0	0	0	0	0	0	0	0	0	0	0	0	0	0.0260202	0	0
MOXD1	0.075242	0.837117	0.159912	0.500669	0.309676	0.342362	0.347265	0.739753	0	0.182133	0.133862	0.107043	0.0292277	0.165337	0.144607	0.0114186	0.898357	0.122382	0.153961	0.0283461	0.274755	0.159146	0.0203676	0.0607252	0.363276	0.199197	0.224228	0.13766	2.21672	0.0690383	0	0.375988	0.494348	0.72936	3.2614	1.4973	0.207646	0.0948985	0.874057	0.186891	0.117065	0.168239	0.115213	0.0104388	0.272063	0.375564	0.32027	0.116093	2.07671
CSF3R	0.456734	0.171148	0.195548	0.205567	0.123748	0.199256	0.15791	0.247249	0.321272	0.185853	0.375033	0.281093	0.422132	0.266048	0.356239	0.0788737	0.174112	0.757521	0.50757	0.978997	0.841097	0.24984	0.243008	0.148293	0.555234	0.277535	0.448813	0.458818	0.31914	0.0928986	0.518351	0.193941	0.477958	0.162845	0.456412	1.18911	0.484311	0.126632	1.88361	1.11145	0.122519	0.701491	9.15927	0.517852	0.297392	0.412713	0.348271	0.284976	0.654959
SLC22A31	0.0762942	0.0197401	0.0853411	0	0	43.0635	0.0242842	0.411344	0	0	0.167058	0	0.0592729	0	110.491	1.18099	163.583	21.1491	89.3363	0.0191617	0.0348247	0	0	0	20.1831	11.8665	1.44944	0.0214747	0.350864	0.0200011	0	0	0.127304	0.164347	0.188972	0	0	0	0.322284	0	0	0	0	0	0	0.108805	0.142573	0.256836	0.547683
ENSG00000180044	0.0514942	0.119911	0.0345602	0.0790727	0.0289004	0.0857218	0.0983427	2.98864	0	0	0.14799	0.0599386	0.090013	0.0848653	0.0228383	0	0.0683131	0.251268	0.256834	0.038799	0.0705139	0.0726111	0.0209088	0.0138531	0.379965	0.0894645	0.0575464	0.0652238	0.222012	0.161995	0.0252954	0.0551398	1.57884	0.116471	2.42973	0.0723332	0.243615	0.170485	2.89577	0.0225714	0.0400586	0.0967175	0.0473097	0	0.0206883	0.0826164	0.561332	0.0433374	0.0191201
ENSG00000230960	0	0	0	0	0	0	0.0476556	0	0	0	0	0	0.0581588	0	0	0	0.0882763	0	0.114885	0.037603	0	0	0	0	0	0	0	0	0	0	0	0	0.0936836	0.0322515	0	0	0	0	0	0	0	0	0	0	0.0401011	0.480417	0	0	0.148245
ENSG00000249497	0	0	0	0	0	0	0	0	0	0	0	0	0	0	0	0	0	0	0	0	0	0	0	0	0	0	0	0	0	0	0	0	0	0	0	0	0	0	0	0	0	0	0	0	0	0	0	0	0
HOXA11-AS	0.113774	0.0353251	0.0458156	0	0.102167	0	0	0	0	0.0137703	0	0.0176576	0	0.112504	0.423867	0	0.0201247	0.206205	0.0174605	0.03429	0.0623191	0.0320863	0	0	0.0621865	0.621243	0.0127147	0	0	0.0357921	0.0223557	1.12083	0.0284766	0.191165	0.0338167	0.0799088	0.0358838	0.473541	0	0.339121	0	0	0.0209058	0.056825	0.329112	0.316399	0.4394	0	0
DIRC1	0	0	0	0	0	0	0	0	0	0	0	0.0496695	0	0	0	0	0	0	0	0	0	0	0	0	0	0	0	0	0	0	0	0	0	0	0	0	0	0	0	0	0	0	0	0	0	0	0	0	0
ENSG00000227960	0	0	0	0	0	0	0	0	0	0	0	0	0	0	0	0	0	0	0	0	0	0	0	0	0	0	0	0	0	0	0	0	0	0	0.143795	0	0	0	0	0	0	0	0	0	0	0	0	0.162863	0
ENSG00000253385	0	0	0.115709	0	0	0	0	0	0	0	0	0	0	0	0	0	0	0	0.0661458	0	0	0	0	0	0	0	0	0	0.0743307	0	0	0	0	0	0.0640542	0	0	0	0	0	0.0670592	0	0	0	0	0	0	0	0
IL24	0.368942	0.0781025	0.112552	0.0515031	0.112944	0.156335	0.224191	0.0957354	0.132423	0.405942	0.550809	0.156161	0	0.331656	0.29751	0.0305401	0.148317	0.233801	0.463254	0.0758139	0.551142	0.212825	0.32685	0.0360921	0.219987	0.0499472	0.187411	0.226575	0.28921	0.580324	0.329518	0.574636	1.15428	0.0433496	0.498451	0.0706702	0.502473	0.158634	0.292217	0.852696	0.0521835	0.179988	0.154073	0.446713	0.350353	0.215245	0.208924	0.0564547	0.846848
NTNG2	0.0338437	0.0328372	0.0397497	0.0259846	0.00949717	0.230991	0.0242378	0.0322006	0.0334053	0.0153606	0.00694743	0.0393937	0.0295798	0.0488043	0.0450303	0.00770412	0.0299318	0.519017	0.019477	0.031875	0.104274	0.0417571	0.027484	0.0091047	0.0739928	0.0377994	0.0283661	0.0285782	0.0802525	0.04658	0.016625	0.0271798	0.0105884	0.0109355	0.106879	0.0178274	0.0133427	0.0400174	0.214445	0.103843	0.0131639	0.0181617	0.00777339	0.0281722	0.0883809	0.0361989	0.0685149	0.0071207	0.13823
DNAH2	0.00770425	0.0269105	0.0103414	0.106473	0.0216195	0.0307804	0.0257485	0.0733021	0.0152089	0.0116557	0.00316305	0.0239138	0.0134672	0.0222198	0.00341693	0.056121	0.0170343	0.0161114	0.0354702	0.026122	0.0263747	0.0190114	0.012513	0.00621784	0.0294768	0.011473	0.0602683	0.0195168	0.0697538	0.00605917	0.0151382	0.0453733	0.0144622	0.0373406	0.125945	0.0189386	0.051635	0.00728771	0.109838	0.016885	0.0239733	0.0124031	0.0247737	0.0128264	0.0526195	0.00824038	0.0143971	0.00324194	0.0400488
FAIM2	0.0109586	1.09729	0.0073548	0.0336552	0.0246014	0.0437822	0	0.0625591	0	0	0.00899828	0	0.0127705	0.00903016	0.0486026	0.0199567	0.0290756	0.0152779	0.0168176	0.00825688	0.0300124	0.00772624	0.0177986	0.0766504	0.0299485	0.00543974	0.0428629	0.0185072	0.170088	0.0258558	0	0	0.0479993	0	0.130287	0.0769668	0.00864068	0	0.0867964	0.0384277	0	0	0	0.00912214	0.00880543	0.0234423	0.0477832	0	0.162759
TXNDC2	0.0195684	0	0	0	0	0.0130301	0	0	0	0.0473679	0.016068	0.0151849	0	0.0161249	0	0	0.034613	0.0136407	0	0	0	0	0	0	0.0213913	0.00971359	0	0	0	0	0	0	0.0122444	0	0	0	0	0	0	0	0	0	0	0	0	0	0.0121893	0	0
DCSTAMP	0.143361	0.129824	0.112252	0.03669	0.0804593	0.413661	0.182525	0.136401	0.0314452	0.086756	0.176574	0.0370823	0.139221	0.0984443	0.296717	0.0870249	0	0.0999334	0.0916707	0.414066	0.588936	0.20215	0.232842	0.141413	0.0261192	0.23721	0.120158	0.141232	0.103014	0	0.140846	0.20468	0.0747535	0.185289	0.0355088	0.302066	0.150717	0.13561	0.0189246	0.146625	0	0.0641103	0.131711	0.0596683	0.0191989	0.408899	0.223251	0.100543	0.124205
ENSG00000231233	0.166984	0	0.224141	0	0	0.0555951	0	0	0.21976	0	0.137113	0	0	0	0.0740593	0	0.0738412	0.232801	0.128131	0.125816	0	0.11773	0.0678025	0	0.0456347	0.0828893	0.0466524	0	0.287973	0	0.0820272	0.0894028	0	0.107911	0.12408	0.05864	0.131664	0	0.066129	0	0	0.0448046	0	0.139001	0.0670874	0.357208	0.156023	0	0.124004
BMP5	0.0335911	0.0521474	0.0676337	0.0257907	0	0.111837	0.0801896	0.239702	0	0	0.0137911	0.0390996	0	0	0.0446942	0	0.0594167	0.0819545	0.0257754	0.0253097	0.0689973	0.0947324	0	0	0.220321	0	0.00938479	0.0283649	0.535851	0	0	0	0.199678	0.130246	1.1981	0.56622	0.463507	0	0.0532111	0.0294479	0.104525	0.279405	0.0154307	0	0.0404867	0.053893	0	0	0.299341
FFAR1	0	0	0	0	0	0	0	0	0	0	0	0	0	0	0	0	0	0	0	0	0	0	0	0	0	0	0	0	0	0.0451777	0	0	0	0	0.0213422	0	0	0	0	0	0	0	0.105551	0	0	0	0	0	0
CTD-2623H2.7	0	0	0	0	0	0	0	0	0	0	0	0	0.226173	0	0	0	0	0	0	0	0	0	0	0	0	0	0	0	0	0	0	0.207822	0	0	0	0	0	0.183588	0	0	0	0	0.178311	0	0	0	0	0	0
KIAA1549L	0.0215541	0.00836526	0	0.00827445	0.00604849	0.00358809	0.00514547	0.0615231	0.00709164	0.00652184	0.00884926	0	0.00627952	0	0.0334584	0.0245327	0.00476569	0.0225373	0.0165391	0.00406007	0.0147577	0.0341923	0.0218798	0	0.1237	0.0561713	0.0391421	0.00455017	0.0232321	0	0.0635281	0	0.00674348	0.00348226	0.412416	0.00378461	0.0297415	0.0101944	0.149378	0.0236196	0.00419188	0.00578335	0	0.0134566	0.0173192	0.0345811	0.0167828	0.00453498	0.00400158
MISP	2.25951	0.0694596	0.030029	0.343528	0.251113	1.65352	8.07494	0.276709	0.0588842	0.0947678	0	0.01736	0.0260705	0.239651	0.09922	0	0	0	0.171662	0.0505682	0	1.54573	0.0181675	0.0481472	7.52004	0.632984	0.0500016	0	0.366518	0.105567	0.021979	0	0	0.0289144	0.648314	0.141412	11.695	0.359752	122.776	0.0196121	0.0696132	0	0.143874	0.260714	0	0.0957129	0.236901	0.0941387	2.87409
RP11-59H7.1	0	0	0	0	0	0	0	0	0	0.0860129	0	0	0	0	0	0	0	0.0990774	0	0.107092	0	0	0	0	0	0	0.079419	0	0	0	0	0	0	0	0	0	0	0.134448	0	0	0	0	0	0	0	0	0	0	0
LAMC2	0.0405783	0.385841	0.0612765	0.0311553	0.011387	0.114835	0.0484349	0.0193041	0.0267018	0.0613908	0.00832991	0.236163	0.011822	0.108672	0.134977	0.0277115	0.0897199	0.00707155	0.0389212	0.00764358	0.0972409	0.221723	0.0164765	0.0818734	0.105351	0.0100714	0.226738	0	0.533595	0.231374	0.169433	0.0977651	0.177736	0.196673	2.13328	0.0712499	0.167976	0.0671727	100.678	0.0800401	0.0710255	0.00544394	0.0279607	5.47208	0.285298	0.0217011	0.22117	0	0.0527343
ENSG00000235535	0	0	0	0	0	0	0	0	0	0	0	0	0	0	0	0	0	0	0	0	0	0	0	0	0	0	0	0	0	0	0	0	0	0	0	0	0	0	0	0	0	0	0	0.0106317	0	0	0.00795577	0	0
ENSG00000235127	0	0	0	0	0	0	0	0	0	0	0	0	0	0	0	0	0	0	0	0	0.19463	0	0	0	0	0	0	0	0	0	0	0	0	0	0	0	0	0	0	0	0	0	0	0	0	0	0	0	0
RLN2	0	0	0	0.0797533	0	0	0	0	0	0	0	0	0	0	0	0	0	0	0	0	0.0711208	0	0	0	0	0	0	0	0	0	0.0510263	0	0.0324985	0	0.231557	0	0	0	0.0822732	0	0	0	0.0477169	0	0.208664	0	0.0323522	0	0.0385693
TLR2	0.679564	0.245341	0.403054	0.533891	0.195133	0.368318	0.332	0.481169	0.374378	0.334733	0.947307	0.331118	0.90243	1.08089	3.1261	0.316584	0.349427	0.727087	1.64923	1.36937	0.779078	0.356555	0.308017	0.144553	1.45118	0.862936	0.706451	0.24021	2.19399	0.65875	1.08686	0.236917	3.04576	6.65885	0.939461	0.532786	0.299066	0.239189	3.19191	1.63484	0.122942	0.356197	1.98918	1.36816	0.533345	0.676143	3.44551	0.891131	1.34965
HAMP	0.860021	0.890075	3.1968	0.101586	0.594062	23.6262	3.41125	0.461587	0.0870646	0.0266897	2.22718	10.0277	0.0770942	16.118	1.6822	0.783094	1.44321	0.261321	93.7086	0.282459	0.694527	27.519	0.286527	0.0355945	0.373644	0.0766244	0.998067	16.0698	1.55922	1.19668	0	0.0708391	658.127	0.242261	2.88393	0.325247	5.92916	0.0417191	0.646241	17.9787	1.0979	76.316	3.52522	0.293703	0.513854	7.87785	2.95329	0.278382	20.8629
CLCA2	0	0	0	0	0	0.0294916	0	0	0	0	0	0	0	0.377128	0	0.0403284	0	0	0	0	0	0	0	0	0.0080693	0	0.0659941	0	0.0127301	0	0.159548	0	0.0277133	0	0	0	0.0349221	0	0.0233864	0	0	0	0	0	0	0	0.0091962	0	0
LCE3E	0	0	0	0	0	0	0	0	0	0	0	0	0	0	0	0	0	0	0	0	0	0	0	0	0	0	0	0	0	0	0	0	0	0	0	0	0	0	0	0	0	0	0	0	0	0	0	0	0
BIN2	1.85389	0.591021	0.966504	0.889617	0.557396	0.672341	0.379343	0.535466	1.39419	0.340577	2.50087	0.84775	1.08022	1.07755	1.14524	0.542593	0.717327	1.68461	1.25743	2.86852	3.01464	0.898612	0.994718	0.329523	1.41138	1.1914	1.32261	0.51716	2.31222	0.768071	1.65875	0.70898	1.91611	0.791568	2.06635	1.22069	1.64449	0.438415	3.30381	3.26498	0.321917	1.13699	1.84011	1.14364	0.571916	1.85897	1.75283	0.863701	3.31888
ENSG00000220161	0	0.027537	0	0	0	0.0472455	0	0	0.0466888	0.0214687	0	0.0275293	0	0	0	0	0	0	0	0	0	0	0	0	0.0193905	0	0	0	0.0611808	0	0	0.0759757	0	0	0	0	0.0279725	0	0	0	0	0	0	0	0	0.037945	0	0	0
PMPCAP1	0.0421168	0.196148	0.169599	0	0.1891	0	0.0402169	0.080144	0.0554282	0	0.24208	0.424869	0.0981614	0	0	0	0.0744971	0	0.0323174	0	0	0	0	0.498534	0.0690601	0	0	0.0355641	0	0.264989	0	0.0450985	0	0	0	0	0	0	0	0.036922	0	0	0	0	0.0338417	0	2.46608	0	0
CTD-2049O17.1	0.221253	0	0.296987	0	1.24175	0	1.69018	0	0	0	0	0	0	0.182319	0	0	0	0	0.509322	0	0	0	0	0	0.362796	0	0	0.18683	0	0	0	0	0	0.428944	0.657623	0.155396	0	0.418582	0	0	0.172119	0.118732	0	0	0	0	0.551282	0.931032	0
SLCO5A1	0.491576	0.0103126	0.240752	0.0204013	0.00745649	0.0132701	0.0253731	0	0.00874247	0.0201001	0.0981832	0.00515485	0	0.0164218	0.135526	0.0120974	0.0235003	0.0324143	0.0152919	0.0100104	0.0454826	0.0562024	0	0	0.272315	0.0164874	0.00371184	0.0112188	0.0801926	0.00522446	0	0.256076	0.0540362	0.0558074	0.128339	0.0186624	0.0995191	0.0942563	0.247289	0.0116471	0.13436	0.00356482	0.0122062	0.204599	0.86471	0	0.103448	0.050316	0.118394
RP11-60C6.8	0	0	0	0	0	0	0	0	0	0	0	0	0	0	0	0	0	0	0	0	0	0	0	0	0	0	0	0	0	0	0	0	0	0	0	0	0	0	0	0	0	0	0	0	0	0	0	0	0
CD74	465.341	133.011	1352.28	228.498	139.393	558.432	140.081	107.147	1580.56	241.147	885.633	216.479	261.692	311.167	163.318	106.945	660.103	620.274	304.65	813.935	1158.02	218.057	193.756	98.4243	534.657	382.436	542.317	211.486	602.707	995.329	390.45	134.092	3716.04	151.855	367.822	214.587	256.9	154.858	907.488	1503.43	89.2595	105.74	506.264	232.187	321.883	1900.43	266.114	541.162	1292.4
MTNR1A	0	0	0	0	0	0	0	0.0489941	0	0	0	0	0	0	0	0.0468881	0	0	0	0	0	0.0363055	0	0	0	0.0255613	0	0	0	0	0	0.0551398	0.0322212	0.0332773	0.0382635	0	0	0	0.0815711	0.0451429	0.0400586	0	0	0	0.0827533	0	0	0	0
ENSG00000243345	0	0	0	0	0	0	0	0	0	0	0	0	0	0	0	0	0	0.0606411	0	0	0	0	0	0	0	0	0	0	0	0	0	0	0	0	0	0	0	0	0	0	0	0	0	0	0	0	0	0	0
PHBP13	0	0.203375	0	0	0.0980332	0	0	0	0	0	0.0717139	0	0	0	0	0	0	0.0608805	0	0	0	0	0	0	0	0	0	0	0	0	0	0	0	0	0.129794	0	0.0688639	0	0	0	0	0	0	0	0	0	0.0544028	0	0
ADAM29	0	0.00864892	0	0	0	0	0	0	0	0	0	0	0	0	0	0	0	0	0	0	0	0	0	0	0	0	0	0	0	0.00876327	0	0	0	0	0.00827962	0	0	0	0	0	0	0	0	0	0	0.0238358	0.0624669	0	0
CRISP3	0	0	0	0	0.0663153	0	0	0	0	0	0	0.0229227	0	0.0243416	0	0	0.0261254	0	0	0	0	0.0208268	0.0479777	0	0	0	0.0165059	0	0.458488	0.116161	0	0	0.0184838	0.305434	0.0658501	0	1.16459	0	0.0701903	0.0258964	10.203	0.570676	0.0271394	0	0	0	0.0920029	0	0.0877464
TMEM159	0.415174	2.01414	0.557286	2.11181	0.699033	1.20949	0.59467	0.493772	0.170748	0.235543	1.76846	0.66448	1.7841	1.00496	0.73654	0.496174	0.803217	0.669257	0.935815	0.684292	0.497457	0.62202	0.358229	0.279227	1.16299	0.592506	1.43541	0.657337	1.54386	0.408153	0.764796	0.86135	1.31516	0.285069	2.12095	1.29395	1.30944	1.66909	9.65954	1.50136	1.51394	0.431669	0.572155	0.7776	0.959103	0.915886	1.43855	0.829849	1.81134
CTB-164L20.1	0	0	0	0	0	0	0	0	0	0	0	0	0	0	0	0	0	0	0	0	0	0	0	0	0	0	0	0	0	0	0	0	0	0	0	0	0	0	0	0	0	0	0	0	0	0	0	0	0
ENSG00000249406	0	0	0	0	0	0	0	0	0	0	0	0	0	0	0	0	0.0699687	0	0	0.059609	0	0.0557781	0	0	0.0432415	0	0	0	0	0	0	0	0	0	0.0587863	0	0.0623797	0	0.062661	0	0	0	0	0	0	0	0.0492802	0	0
ENSG00000237713	0.236494	0	0.158722	0	0	0	0	0	0	0	0	0.0611725	0	0	0	0	0	0	0	0	0	0	0	0	0	0	0	0	0	0	0	0	0	0	0	0	0	0	0	0	0	0	0	0	0	0	0.73657	0	0
ENSG00000233029	0.0187344	0	0	0	0	0	0	0	0	0	0	0	0	0	0	0	0	0	0.0143755	0	0.0256541	0	0.0152139	0	0.0102398	0	0.0104682	0	0	0	0	0	0	0	0	0	0	0	0.0741922	0.0164237	0	0	0	0.0155949	0	0	0.0116698	0	0
ENSG00000249409	0	0	0	0	0.134973	0	0	0	0	0	0	0	0	0	0	0	0	0	0	0	0	0	0	0	0	0	0	0	0	0	0	0	0	0	0.0893509	0	0	0	0	0	0	0	0	0	0	0	0	0	0
FMOD	0.421117	2.64613	2.61097	6.25097	1.238	5.60822	1.3404	6.62062	0.0791735	1.10432	1.25142	1.77397	0.0701068	2.23079	3.93107	0.493005	3.58252	0.824737	3.15441	0.498608	0.823799	0.947267	0.374552	0.0971053	10.3358	1.304	4.31394	1.38852	3.68307	0.646621	0.197014	1.05217	3.16203	0.583157	15.02	5.42243	2.46662	1.00535	20.0125	0.949309	0.436796	2.33519	3.96108	0.834635	0.644525	1.26547	1.33657	0.894466	5.13764
ENSG00000230051	0	0	0	0	0	0	0	0	0	0	0	0	0	0	0	0	0	0	0	0	0	0	0	0	0	0	0	0	0	0	0	0	0	0	0	0	0	0	0	0	0	0	0	0	0	0	0	0	0
DDN	0.03541	0	0.0118826	0	0	0.0707359	0	0.0168454	0.0233008	0	0	0	0.123795	0	0	0.0161213	0.0156585	0.308543	0	0.0800404	0.0727333	0.0249655	0	0.00952605	0.0193543	0.0263658	0.0296789	0.0149504	0.0152666	0.0139245	0.0347888	0.0189585	0.0110784	0	0.0657798	0	0.0279203	0.100486	0.154254	0.0155212	0.0275463	0	0.0162663	0	0.042679	0	0.0220571	0.0149005	0
ENSG00000235209	0	0	0	0	0	0	0	0	0	0	0	0	0	0	0	0	0	0	0	0	0	0	0	0	0	0.14579	0	0	0	0	0	0	0	0	0.0727459	0	0	0	0	0	0	0	0	0	0	0	0	0	0
ENSG00000259755	0	0.858694	0.0618723	0	3.82874	0.122773	0.176061	0.350852	0	0	0	0.143076	0	0	0	0	0.0815329	0.0642627	0.141478	0	0	0	0.0748652	0.148805	0.100777	0.869474	0	0	0.158985	1.45008	0	0	0	0	0.0685024	0	0	0.436022	0	0.0808182	0	0	0.0846975	0	0	0.0986042	0.0574252	0	0
NMD3P2	0	0	0	0	0	0	0	0	0	0	0	0	0	0	0	0	0	0	0	0	0	0	0	0	0	0	0	0	0	0	0	0	0	0	0	0	0	0	0	0	0	0	0	0	0	0	0	0	0
ENSG00000275239	0	0	0	0	0	0	0	0	0	0	0	0	0	0	0	0.053819	0	0	0	0	0	0	0	0	0.032306	0	0	0.04991	0	0	0	0	0	0	0	0	0	0	0	0	0	0	0	0	0	0	0	0	0
WDFY4	0.373389	0.109156	0.178999	0.282959	0.0762035	0.138846	0.0463047	0.641316	0.127637	0.0792326	0.274743	0.0978367	0.0960673	0.231761	0.318301	0.04857	0.115795	0.419154	0.215815	0.485943	0.43162	0.164107	0.0551316	0.060009	0.426725	0.252746	0.124641	0.151506	0.158892	0.144923	0.247736	0.155776	0.406592	0.0564071	0.677417	0.316741	0.275295	0.0596314	0.944831	0.697181	0.0452679	0.153533	0.360868	0.258342	0.140272	0.29564	0.362473	0.163244	0.558167
ENSG00000260681	0	0	0	0	0	0	0	0	0	0	0	0	0	0	0	0	0	0	0.15318	0	0	0	0	0	0	0	0	0	0	0	0	0	0.0624557	0	0	0	0	0	0	0	0	0	0	0	0	0	0	0	0
ENSG00000254802	0.0772712	0	0.0518603	0.118655	0.0867349	0.102906	0	0.147039	0.203387	0	0.634489	0.0599619	0.0900479	0.0636736	0.0685415	0.0703595	0.136679	0	0.118585	0.0582211	0.211624	0.0544794	0.75301	0.0415753	0.0422347	0.0767136	0	0	0.399776	0.36463	0.379579	0.165484	0.193402	0.199741	0.22967	0.162813	0.182782	0.0730934	0.122404	0.135481	0.0601112	0	0.0709921	0.128644	0.062089	0	0.240664	0.0650313	0.286912
ENSG00000250497	0.0138833	0	0	0	0	0	0	0	0.0182712	0	0	0	0	0.0114402	0	0	0.0122785	0	0	0	0	0.00978829	0	0.00746981	0	0	0	0	0	0	0	0	0	0	0	0	0	0	0	0	0	0	0	0	0	0	0.00864801	0	0
RGS1	0.741631	0.97612	0.670872	0.891253	2.00876	0.40795	1.95519	1.91746	0.360707	0.0682964	3.30961	1.32615	3.75765	2.32493	0.743651	0.0587212	1.58273	1.91056	8.74644	3.74148	14.5931	0.511514	1.71515	0.850107	0.775468	3.36127	1.7657	1.57923	8.41072	7.04998	5.54386	0.811401	2.66328	0.687645	14.9511	1.66455	1.09326	0.930294	108.286	3.5476	0.012542	2.57825	0.622116	8.71	0.297958	1.34506	0.753209	0.569881	2.78963
SIGLEC11	0.251028	0.0974251	0.365033	0.25698	0.375696	0.278589	0.119852	0.0597102	0.440491	0.405098	0.480956	0.146097	0.536314	0.189616	0.12989	0.171431	0.037002	0.4083	0.0802588	0.157617	0.658848	0.339222	0.186868	0.067532	0.274412	0.124608	0.140266	0.158979	0.108228	0.115165	1.0276	0.0896001	0.327238	0.0540743	0.155442	0.396693	0.0824718	0.0395759	0.149119	0.678537	0.0488203	0.808262	0.0576573	0.278615	0.134471	0.0223747	0.143337	0.492951	0.807803
ENSG00000262267	0	0.101721	0	0	0.441295	0	0	0	0.172467	0.0396525	0	0	0	0	0	0	0	0	0.301672	0	0	0.0461973	0	0	0.17907	0.130103	0	0	0	0	0	0	0.0410001	0.296408	0	0	0	0	0	0	0	0	0	0	0	0	0.204078	0	0
C20orf197	0.0242958	0	0.016306	0.0373077	0	0.0161779	0	0.531672	0.287772	0.0147028	0.0598491	0.0754133	0	0	0.0215509	0	0.0214875	0.067744	0.0186428	0.036612	0.0332696	0.0171295	0.0197302	0	0.026559	0.0964817	0.0135757	0	0.0209497	0	0.0954782	0.0260158	0.0304049	0	1.28179	0.0511919	0.0383137	0	0.134703	0.0212991	0	0.0130379	0.0892858	0	0.0195221	0.0259865	0.060536	0	0.0902114
CD1B	0.666139	0	0.319341	0.292257	0.0534088	0.0633665	0	0.135814	0	0	0.19535	0	0.0554488	0.0784167	0	0	0	0.232175	0	0.0358508	0.0651559	0.0335468	0.11592	0	0.0520137	0.377904	0.0265869	0.0803569	0.0410284	0	0	0	0.0595456	0.0307487	0.106068	0.0334185	0.41269	0	0.0376864	0.834253	0	0	0.393434	0.0396078	0.0382326	0.254462	1.03736	0.0400444	0.0353344
UBD	218.974	140.488	185.2	36.1003	16.7243	199.928	38.6006	17.5458	192.389	46.2283	324.408	5.73356	187.578	21.838	12.0246	94.6337	367.614	122.037	112.032	319.717	75.9249	6.02732	1.58684	8.14799	32.9754	70.5952	80.9673	8.50789	67.818	47.6885	23.9369	2.68085	110.386	48.4979	104.633	6.43313	19.2591	9.81953	34.8227	230.401	0	2.39212	219.413	38.2754	51.6172	169.617	236.285	265.845	355.788
C6orf222	0.0177666	0	0	0	0.0199425	0	0	0	0.0467638	0.0107516	0.0729424	0	0	0	0.0630376	0	0	0.0123847	0.0136328	0	0	0	0	0	0	1.29642	0	0	0.0306395	0	0	0	0	0.0574069	0.0132017	0	0.0280174	0	0	0	0	0	0	0	0	0.019003	0.0332008	0.149523	0
ENSG00000233038	0.128139	0.0663084	0.105111	0.109314	0.0639256	0.132727	0	1.47656	0.131163	0.0689284	0.116908	0.0883865	0.099551	0.0586612	0.189437	0.0907489	0.0755518	0.238194	0.2185	0.236007	0.233957	0.0903433	0.0115622	0.0229815	0.280151	0.141349	0.167066	0.024045	0.0613842	0.0671851	0.153867	0.198194	0.142542	0.0368035	0.264488	0.149996	0.190846	0.0404036	0.281921	0.661524	0.0553792	0.275055	0.156968	0.177776	0.045761	0.137056	0.035475	0.131806	0.253753
CTD-3093M3.1	0	0	0	0	0	0	0	0	0	0	0	0	0	0	0.633088	0	0	0.497518	0	0	0	0	0	0	0	0	0	0	0	0	0	0	0	0	0	0.501277	0	0	0	0	0	0	0	0	0	0	0	0	0
TPBG	0.00961414	0.111939	0.064525	0.23621	0.0755413	0.121634	0.0550828	0.201242	0.0379583	0.0174542	0.0947322	0.193973	0.0112038	0.0554562	0.298479	0.0262625	0.0765257	0.0737197	0.0885265	0.00724391	0	0.0474485	0.0546525	0.0465554	0.656858	0.0811304	0.354556	0.121775	0.232122	0.0378062	0.0566729	0.49415	0.0962528	0.0559169	1.32163	0.0877816	0.295644	0.109132	6.51065	0.0758549	0.575889	0.103186	1.03345	0.0960362	0.363082	0.0925486	4.14419	0.00809124	0.214187
PBX4	0.129945	0.0403458	0.13954	0.119724	0.087516	0.0865273	0	0.123636	0.205219	0.031455	0.234741	0.121004	0.121145	0.107078	0.0691587	0.0709931	0.022985	0.235513	0.119653	0.234982	0.427059	0.0366467	0.0844212	0.0279665	0.05682	0.116107	0.174262	0.0219456	0.918802	0.0204396	0.153199	0.027829	0.195144	0	0.270362	0.0912662	0.10246	0.0737517	0.617532	0.38732	0.040435	0	0.0955086	0.173071	0.0417654	0.277976	0.194265	0.0218723	0.347395
ENSG00000234311	0.720766	0	0	0	0	0.0436309	0	0.311715	0	0	0	0.0508462	0	0	0	0	0	0	0.100557	0.0493701	0.089726	0	0	0.0352549	0.071628	0	0.0732254	0	0.0565001	0	0	0	0.0410001	0	0.486888	0	0	0	0	0.172327	0.101946	0	0	0	0.05265	0	0	0	0
KCNQ3	0.0106389	0.004129	0.0107104	0.0735152	0.0179128	0.0247946	0.0609539	0.237876	0.0140014	0.061163	0.0218395	0.0206392	0.018597	0	0.0188739	0.00484363	0.0470458	0.0296645	0.0122453	0.0641281	0	0.0375043	0.0172794	0.0143105	0.0697796	0.0607321	0.101059	0.0179673	0.0550421	0.0334687	0.0522613	0.0797446	0.00665701	0.0756273	0.185777	0.048569	0.0671089	0.0352228	0.834218	0.04197	0.0289669	0.0114184	0.00977436	0.0442802	0.0256457	0.0455169	0.0298217	0.00895367	0.0513536
ENSG00000276691	0	0.283086	0.244769	0.186675	0	0	0	0.578328	0	0	0.0998216	0	0	0	0.215667	0.110694	0	0.084742	0.0932825	0	0	0.257131	0	0	0	0.241381	0.135856	0	0.419301	0.191219	0.119435	0.260349	0.0760679	0.0785612	0.180666	0.0853824	0	0.114995	0.28886	0.106574	0.0945706	0.0652375	0	0	0.195364	0	0	0	0
ENSG00000262884	0	0.0202363	0	0.0400333	0	0.0173598	0	0	0	0	0	0	0	0	0	0	0	0	0	0	0	0	0	0	0	0	0	0	0	0	0	0	0	0	0.0193722	0	0	0	0.0412982	0	0	0	0	0	0	0	0	0	0
ENSG00000223662	0	0	0	0	0	0	0	0	0	0	0.064884	0	0	0	0	0	0	0	0	0	0	0	0	0	0	0	0	0.0667249	0	0	0	0	0	0	0.0587163	0	0	0	0	0	0	0.0424044	0	0	0	0	0.0492216	0	0
PNPLA1	0	0	0.0173541	0.0397058	0	0	0	0.024602	0	0.0156478	0	0	0	0	0.0229362	0	0	0.0180246	0	0.0194826	0	0.0364611	0	0.0139124	0.0141331	0	0	0	0	0.0203361	0.0508076	0	0	0.0167099	0.0384275	0	0.0815529	0.0489188	0.0204802	0	0	0.013876	0.0475124	0	0.0623309	0	0.0644271	0	0
ENSG00000238279	0.125002	0.0970276	0.167789	0	0	0.249707	0	0	0	0.075646	0.205283	0	0.437012	0.103005	0	0.113821	0	0	0.0959176	0.0941844	0	0.0881315	0.203024	0	0	0	0.0698469	0	0.538932	0.196621	0	0	0.23465	0	0.278654	0	0.0985623	0	0.495034	0	0	0	0.114844	0.104054	0	0.267401	0.155729	0	0
ENSG00000231106	0	11.553	0.0425077	0	0.213278	0.801302	0	0.0602609	0	0.574924	0	7.32307	0.221425	0.0521905	0	0	0.168045	0.04415	0.534594	0.0954426	0.0867294	0	0.0514341	0.0681549	0.103854	0	2.44191	0.106964	0.273066	3.53664	0	1.0173	0.118892	0.122789	0.141188	0	0	0.119823	0.401317	0	0.0492706	0	0	0.0527221	0.152675	0.270973	9.90255	0.106607	0
UTS2	0.296487	0.316437	0.0248733	0.170728	0.0415998	0.370169	0	0.176308	0.0975486	0	0.365176	0.0862768	0.302322	0.305392	0.0328739	0	0.0327771	1.0592	0.227503	0.530556	1.62399	0.130647	0.722318	0.179463	0	0.0367934	0	0	0	0.32062	0	0.0793694	0	0	0.330464	0.0260295	0.379886	0	0	0.0649795	0	0	0.44264	0.123401	0	0.0396399	0	0.155952	1.29352
OR52K2	0	0	0	0	0	0	0	0	0	0	0	0	0	0	0	0	0	0	0	0	0	0	0	0	0	0	0	0	0	0	0	0	0	0	0	0	0	0	0	0	0	0	0	0	0	0	0.11625	0	0
MRPS6P2	0	0	0	0	0	0	0	0	0	0	0	0	0	0	0	0	0	0	0	0	0	0	0	0	0	0	0	0	0	0	0	0.192095	0	0	0	0	0	0	0	0	0	0	0	0	0	0	0	0	0
ENSG00000253288	0	0	0	0	0	0.0105965	0	0	0	0	0	0	0	0	0.0282317	0.0144902	0	0	0	0	0	0	0	0	0	0	0	0	0	0	0	0	0.00995758	0	0	0	0.0125477	0	0.0126043	0	0	0	0	0	0.025574	0.0170211	0	0	0
DPEP3	0	0	0.066226	0	0.0369204	0.0657059	0.0314083	0	0	0.0199049	0.108033	0	0.0383306	0	0.029176	0	0	0.183426	0.0757169	0.0495658	0.0450408	0.0927608	0.0534222	0	0.125846	0.0489819	0.0551368	0	0	0	0	0.140883	0.0205813	0.0637678	0.0733227	0.0693044	0	0	0.208415	0.0865052	0.0255875	0.0353019	0.0604383	0.02738	0.0264294	0.105543	0.0204887	0.276818	0.0732778
FAM169B	0	0.0312158	0	0.0308769	0	0.040168	0.0192008	0	0	0	0	0	0	0	0	0	0	0.0140167	5.46198	0	0	0	0	0	0.0329714	0.0299441	0.0112356	0	0.0693543	0	0	0	4.34078	0.779663	0.0149414	0	0.0475643	0	0.0477788	0	1.17318	0	0.0184739	0.0334764	0	0.0215071	0	0	0.537563
ENSG00000249109	0	0	0	0	0	0	0.208905	0	0	0	0	0	0	0	0.465739	0.039841	0	0	0	0.0329677	0	0	0	0	0	0	0.0244487	0	0.0377288	0	0	0	0	0	0	0	0	0	0	0	0	0	0	0	0	0	0	0	0.0324928
HSPB7	0.0339519	0.197653	0.0683602	0.234609	0.0571652	0.55389	0.0324204	0.145366	0.759607	0.154097	0.0418178	0.0658661	0	0.083932	2.83092	0.0772874	0.270247	0.106502	0.143288	0	0.232461	0.119688	0.0413578	0	1.99491	0.0926939	0.682963	0.60206	0.175656	0.0267022	0	0.309023	0.339913	0.219409	1.6777	0.0953837	0.133853	0	1.46558	0.133939	0.0396181	0.428165	0	0	0.150046	0.236045	0.444127	0.100009	0.718572
ABCF2P2	0	0	0	0	0	0	0	0	0	0	0	0	0	0	0	0	0	0	0	0	0	0	0	0	0	0	0	0	0	0	0	0	0	0	0	0	0	0	0	0	0	0	0	0	0	0	0	0	0
KRT13	0	0	0	0	0	0.0151727	0	0	0	0	0	0	0	0.168988	0.0808474	0.020748	0	0	0	0	0	0	0	0	0	0	0	0	0	0	0.738751	0.0487987	0	0	0	0	1.86852	0	0.324856	0	0	0	0	0	0	0.389949	0	0.0191768	0
ENSG00000269729	0	0	0.0524712	0	0	0	0	0	0	0	0	0	0	0	0	0	0	0	0	0	0.107058	0	0	0	0	0	0	0	0	0	0	0	0	0	0	0	0	0	0	0	0	0	0	0	0	0	0	0	0
LINC00544	0	0	0	0	0	0	0.0421983	0	0	0	0.0362867	0	0	0	0	0	0.0390837	0	0.0339096	0	0.0605143	0	0.0358875	0	0	0	0	0	0	0	0	0	0.0276518	0	0	0	0	0	0	0	0	0	0	0	0	0	0	0	0.0328173
AC011515.2	0.114639	0	0	0	0	0	0	0	0	0	0.0941323	0	0	0	0	0	0	0	0.0879659	0	0.156982	0.0808253	0.186193	0.0616808	0	0.0569058	0.0640564	0	0.197702	0	0	0	0	0	0.0851843	0	0	0	0.635592	0	0	0.0615193	0	0	0	0	0.0714095	0.28944	0.255396
ECEL1P1	0	0	0	0	0	0	0	0	0	0	0	0	0	0	0	0	0	0	0	0	0	0	0	0	0	0	0	0	0	0	0	0.0408009	0	0	0	0	0	0	0	0	0	0	0	0	0	0	0	0	0
GNGT2	0.550186	0.335546	0.395631	0.543116	0.308784	0.497196	0.562894	0.261737	0.413759	0.190257	0.806729	0.548923	0.503767	0.388601	0.557747	0.465189	1.18172	0.465705	0.482484	0.829091	1.07629	0.692685	0.510626	0.148012	0.880677	0.643754	0.658769	0.232293	0.779394	0.927226	0.501925	0.462894	0.663939	0.330153	0.67164	0.57963	0.805655	0.297394	1.24506	2.03266	0.214002	0.421784	0.613794	0.621553	0.410508	1.05084	0.416154	0.496109	1.45919
ENSG00000260196	0.0920929	0.142967	0.309039	0.0353537	0.103372	1.11913	0.0879388	0.197149	0.3333	0.236856	0.51043	0.0357317	0.751242	0.151774	0.449288	1.09012	0.0610861	0.545665	1.05998	0.0867359	1.13497	0.162323	0.0934842	0.408788	0.339767	1.81714	0.0771877	0	0.15882	1.72018	1.10835	0.0986129	0.201687	0.193419	0.342155	0.0970214	0.0544605	2.39563	7.40356	0.100918	1.25372	0.0741304	0.063457	0.268311	0.813984	0.517133	0.731409	0.794429	0.119681
LAG3	1.65071	1.93881	0.743439	0.333523	2.16982	0.925615	0.788126	1.19859	0.142923	0.762351	1.35543	0.876432	0.480914	2.30882	1.69542	0.61309	1.76726	1.25666	0.899981	1.71834	9.66624	0.903492	1.7462	1.92823	0.724167	1.74661	0.49759	0.843669	2.17252	5.73958	3.15815	0.232576	1.08725	1.76855	0.69399	2.86791	1.72971	0.945096	0.722529	2.07546	0.456204	1.30543	5.42774	1.59105	0.244333	3.34532	4.30238	0.219353	2.06457
AC005682.6	0.452461	0.175602	0.0607335	0.208435	0.0507875	0.301282	0.0432051	0.0860988	0.476372	1.06786	0.408677	0.105332	0.158182	0.484692	0.120403	0.535586	0.280113	0.44156	0.173593	0.375004	0.247832	0.159502	0.220462	0.0973774	0.0494609	0.269517	0.227538	0.076413	0.351133	0.142339	1.82255	0.242247	0.141558	0.0584791	0.336208	0.254226	6.10058	0.0855995	0.0358368	0.198327	0	0.364209	0.956095	1.39356	0.145425	0.145184	0.563683	2.32282	0.974406
FERMT3	5.26072	3.56249	4.27173	5.38545	3.03756	3.22909	2.23263	10.9993	3.84635	2.3713	4.95963	2.13354	3.73384	4.12091	3.05332	2.26695	6.45243	6.68534	4.60151	10.8147	8.1821	3.8464	2.30309	1.5725	6.55541	5.11529	3.30242	2.68728	7.54168	4.42685	5.35986	2.78181	3.86071	2.25245	10.1989	3.66442	11.9149	2.25264	9.24221	11.3114	1.17889	2.27706	6.6432	3.76642	2.33099	7.8729	5.92007	6.54091	9.67824
ENSG00000267654	0	0	0	0	0	0.0776769	0	0	0	0	0	0.181045	0	0	0	0	0	0	0	0	0.319481	0	0.189466	0	0	0	0.0651822	0	0.201176	0.550469	0	0	0.145986	0	0	0	0	0	0.0923947	0	0	0	0.214349	0.0971051	0	1.12294	0	0	0
IMPDH1P11	0	0.0342564	0	0	0	0	0	0	0	0	0	0	0	0	0	0	0	0	0	0	0	0	0	0	0	0	0	0	0	0	0	0	0	0	0	0	0	0	0.0349552	0	0	0	0.0405467	0	0	0	0	0	0
SLC52A1	0	0.0654825	0.0226477	0.0259087	0.0189388	0.370752	0.0161113	0.144479	0	0	0.0415627	0	0	0.04171	0.0448987	0.0307264	0	0.0823295	0.0129467	0.0127127	0.069313	0.0475829	0	0.00907808	0.147553	0	0	0	0.0727435	0.132697	0.0497292	0	0.0105575	0.0654211	0.225671	0.0237004	0.0133037	0.0638406	0.0267273	0.0147913	0	0.0452716	0.0155013	0	0.0135573	0	0.0525497	0	0.100237
ENSG00000258667	0	0	0	0.191228	0	0	0	0.710921	0	0	0.102256	0.0966365	0	0	0	0.113394	0	0.0868089	0	0	0.34106	0	0.101131	0.0670041	0.2042	0	0.0695848	0.105158	0	0	0.122348	0	0.0779232	0	0.555216	0.0874649	0	0	0.295906	0	0	0.0668286	0	0.103664	0	0	0	0	0.0924794
IQCD	0.296803	2.95307	2.95176	0.0828656	2.15036	0.215601	0.541065	0.410754	0.461631	0.685795	0.376644	0.732827	0.188661	0.177872	0.263272	0.17198	0.859079	0.225703	0.9938	3.13083	0.443378	1.08434	0.131471	0.319386	0.855372	2.89304	0.964909	0.318978	0.791048	1.74009	0.238579	0.231139	0.523384	0.244115	1.48366	0.360064	0.0638251	0.561512	2.86371	0.283849	0.0419801	0.101357	0.148737	0.179684	0.411933	0.721494	2.62195	0.0681243	0.320595
ENSG00000228309	0	0.0407286	0	0	0	0	0	0	0	0	0	0	0	0	0	0	0	0	0	0	0	0	0	0	0	0	0	0	0	0	0	0	0	0	0.0389895	0	0	0	0	0	0	0	0	0	0	0	0.0326847	0	0
STAB1	3.57959	4.47189	5.90299	8.10546	2.06177	6.91692	2.90331	4.98046	6.9138	3.55093	2.88779	3.26907	4.54405	7.6764	3.14182	4.5095	7.31856	6.49376	6.04664	8.29438	3.63123	7.64641	6.14477	1.91586	12.5204	7.47782	6.65901	3.66849	11.3139	2.65254	6.39305	5.79987	11.1443	3.79195	18.1719	4.51746	6.02059	1.72564	8.18777	6.42455	2.65298	7.86876	3.21959	4.70703	10.281	10.2322	4.43608	6.4103	9.36669
ENSG00000233928	0	1.10691	0.609055	0	0	0	0	0	0.170615	0	0	0	0	0	0	0	0	0	0	0	0	0	0	0	0	0	0	0	0	0	0	0	0	0	0	0	0	0	0	0	0	0	0	0	0	0	1.9381	0	0
FAM101A	0	0.213046	0.0614032	0.140489	0	0.106612	0.0218408	2.15444	0	0.110732	0	0.0354978	0	0.0565427	0.243462	0.0208266	0.16183	0.430485	0.0351015	0	0.125282	0.322521	0.0371488	0.0369192	1.63771	0.272489	0.102243	0.0193139	0.631119	0	0	0.0734755	0.200366	0.073905	1.76756	0.144579	0.360693	0	0.307972	0.100257	0.0177931	0.0981934	1.82821	0.0190396	0.0183785	0.0978567	0.11398	0	0.25478
ENSG00000260015	0	0.881788	0	0	0	0	0	0	0	0	0	0	0	0	0	0	0	0	0	0	0	0	0	11.526	0	0	0.181363	0	0.139938	0	0	0	0	0	0.120591	0	0	0	69.1541	0.142272	0.126248	0	0	0	0	0	0	0	0
ENSG00000267737	0.115941	0	0.0389066	0	0.0650701	0.038601	0.0553554	0	0	0	0.0476005	0	0	0	0	0	0	0	0.0444823	0	0	0.0408715	0	0	0.0633705	0	0.0323919	0	0	0.045592	0	0	0.10882	0.0749248	0.172303	0	0	0	0.137745	0	0.0450966	0	0	0	0	0.248018	0.0722203	0	0.0860987
RP11-1166P10.8	0	0.149338	0	0	0	0.128111	0	0	0	0	0.157979	0	0	0	0	0	0	0	0	0	0	0	0	0	0	0	0.215007	0	0	0.907875	0	0	0	0	0.142961	0	0	0	0	0	0	0.103245	0	0	0	0	0	0	0.142874
ENSG00000249551	0	0	0	0	0	0	0	0	0	0	0	0	0	0	0	0	0	0	0	0	0	0	0	0	0	0	0	0	0	0	0	0	0	0	0	0	0	0	0	0	0	0	0	0	0	0	0	0	0
ENSG00000232153	0	0.903888	0	0	0	0	0	0	0	0.234901	0	0	0	0	0	0	0	0.27058	0.297849	0.292467	0	0.273671	0	0	0	0.192681	0	0	0.334705	0	0	0	0.72865	0	1.44216	0.272624	0	0	0	0	0	0	0	0.323116	0.623795	0	3.14327	0	0
CCNJL	0.112122	0.0979085	0.197531	0.193691	0.0314634	0.074659	0.040149	0.293365	0.0922242	0.00848142	0.644456	0.15226	0.0163326	0.150136	0.161614	0.089331	0.123952	0.117236	0.15056	0.1056	0.0191918	0.286558	0.227631	0.0301632	0.59751	0.153055	0.172287	0.0118347	0.253785	0.0440902	0.041308	0.0450223	0.105236	0.0543426	1.07266	0.0787479	0.430981	0.0132574	0.266415	0.172012	0.0545139	0.0902525	0.24465	0.116666	0.191446	0.149905	0.209524	0.0825662	0.156118
ENSG00000225542	0	0.657723	0	0	2.21931	0	0	0	1.36298	0	1.23694	0	0.219436	0	0	0	1.24902	0	0	0.0709389	0	0	0.0764581	2.48219	0	0	0	0.0795021	0	0.518326	0.184997	0	0	0	0	0	0	0	0	0.165076	0	0	0	0	0	0	9.32487	0	0
ITPRIPL1	0.142683	0.143977	0.210674	0.219099	0.144142	2.02369	0.245244	0.0950288	0.150223	0.0345383	0.281183	0.155009	1.41334	0.141089	0.253126	0.142912	0.214523	0.198922	0.218969	0.129008	0.488459	0.231374	0.208567	0.0614156	0.171572	0.233727	0.438495	0.132532	0.282974	0.145881	0.168216	0.152784	0.383904	0.13831	0.307466	0.380807	0.528766	0.0134968	0.542451	0.400269	0.0332989	0.0535979	0.275285	0.356317	0.298086	0.213657	0.248859	1.1768	0.423831
CKMT1A	0	0.0497153	0.0286575	0	0.191715	1.86232	0	0	0	0.0129199	0.31555	0	0.0497595	0.0351854	0.0378753	0	0.0377637	1.53288	0.0163822	0	0.116941	0.0150524	0	0.011487	0.0700153	0.0105978	0	0	0.184093	0.0335817	0	0	0	0.0137969	0.111049	0.34488	0.639688	0.504883	0.169098	0.0935818	0	0	0.176533	0	0	0	0.0531954	1.77881	0.221962
ENSG00000258481	0	0	0	0	0	0	0	0	0	0	0	0	0	0	0	0	0	0	0	0	0	0	0	0	0.062551	0	0	0	0	0	0	0	0	0	0	0	0	0	0	0	0	0	0	0	0	0	0	0	0
ENSG00000254082	0	0	0	0	0	0	0	0	0	0	0	0	0	0	0	0	0	0	0	0	0	0	0	0	0	0	0	0	0	0	0	0	0	0	0	0	0	0	0	0	0	0	0	0	0	0	0.0733087	0	0
ENSG00000235687	0	0	0.120238	0	0	0.238586	0	0	5.42283	0	0	0	0	0	0	0	0	0	0.0687345	0	0	0.063155	0	0	0	0	0.400418	0	0	0	0	0	0.05605	0	0	0	0	0	0.141896	0	0	0	0	0	0	0	0.223191	0	0
ENSG00000233365	0	0	0	0	0	0	0	0	0	0	0	0	0	0	0	0	0	0.0298896	0	0.0323075	0	0	0	0	0	0	0	0	0	0	0.0421264	0	0.0268301	0	0	0	0	0	0.0339616	0.0375899	0	0	0.0393942	0	0	0	0	0.0360865	0
MUM1L1	0.825306	0.083042	0.0102574	0	2.26449	0.0203537	0.175128	0.61074	0.0201139	0.00924891	9.72588	0	0	0.012594	0.135568	0	0	0.0213075	0	0	0	0	0	0	0.00835358	0.0910389	0	0	0.0395358	0.601	0.0150153	0.0163655	0.0191264	0.622231	0.0794962	0.246887	0.168711	1.73485	0.0484205	0	0	0.00820163	2.42918	0	0.0122806	2.51744	3.52246	5.22218	0
LGALS7	0	0	0	0	0	0.11119	0	0.714945	0	0	0	0	0	0	0	0	0	0	0	0	0	0	0	0	0	0	0.0466524	0	0	0	0	0	0	0	0	0	0.0658322	0	0	0	0	0	0	0	0	0	0	0	0.186006
ZNF280B	0	0.00900256	0.0155681	0.0178097	0	0.0386145	0.0110749	0.02207	0.0457914	0.0070187	0.00952343	0.180001	0	0.00955717	0.0205756	0.0105607	0.0102575	0.0323391	0.0177991	0.0262163	0.015882	0.00817715	0.0188373	0.0124806	0.0380356	0.028786	0.0324032	0	0.0300024	0	0.0113947	0	0	0.0149902	0.0258545	0.0325835	1.14312	0	0.0275586	0.0203352	0.00902246	0.0311198	0.277047	0.019309	0	0	0.0361228	0.00976095	0.068903
MRPS18CP6	0	0	0.199767	0	0	0	0	0	0	0	0	0	0.346866	0	0	0	0	0	0	0	0	0	0	0	0	0	0	0	0	0	0	0	0	0	0.221174	0	0	0	0	0	0	0	0	0	0	0	0	0	0
ENSG00000256287	0	0	0	0	0	0.102548	0	0.146528	0	0	0	0	0	0.253808	0.546424	0.140229	0	0	0.590861	0	0	0	0	0	0.589228	0	0	0	0	0	0	0	0.0963644	0	0	0.216328	0	0.145678	0.121978	0	0.838629	0	0	0.128197	0.123746	0	0.671515	0	0
TUFMP1	1.13337	0.0764984	0.0992161	0	0	0.164061	0.0941082	0	0	0.0298203	0.0404622	0.076477	0	0	0.0437098	0	0.522973	0.0686996	0	0	0.0674777	0	0	0.0265131	0.269336	0.0489213	0	0	0.0849809	0	0.0484125	0.105531	0	0.0955333	0.036616	0.0346093	0	0.139838	0.117088	0.0431991	0.0766675	0.0264437	0	0	0.07919	0	0.0613899	0	0.0365936
RP11-15H20.2	0	0	0	0	0	0	0	0	0	0	0	0	0	0	0.645819	0	0	0.0845871	0	0	0	0	0	0	0	0	0	0	0	0	0	0	0	0	0.360671	0	0	0	0	0	0	0	0	0	0	0	0	0	0
ENSG00000253853	0	0	0	0	0	0	0	0	0	0	0	0	0	0	0	0	0	0	0	0	0	0	0	0	0.118949	0.0540139	0	0	0	0	0	0	0.068087	0	0	0	0	0.10293	0	0	0	0	0	0	0	0	0	0	0
ENSG00000257319	0	0	0	0	0	0	0	0	0	0	0	0	0	0	0	0	0	0	0	0	0	0	0	0	0	0	0	0	0	0	0	0	0	0	0	0	0	0	0	0	0	0	0	0	0	0	0	0	0
KCNV1	0	0	0	0	0.0106756	0	0	0	0	0	0	0.00738032	0	0	0	0	0	0.00662977	0	0.00716606	0	0	0	0	0	0	0	0	0	0	0	0	0	0	0	0	0	0.0089966	0	0	0	0	0	0	0	0.0203453	0.0296218	0	0
ENSG00000228221	0	0.125255	0.577608	0.082597	0.060377	0	0.051363	0.0511778	0	0	0	0.0834802	0	0.0886477	0.0477124	0	0.0951438	0	0.0825482	0.526868	0.0736568	0	0	0	0.0588	0.48061	0.240445	1.22635	0	0.126911	0.0528457	0.0575974	0	0.173802	0.039969	0.226672	0	0	0	0.0471549	0	0.317517	0.0494183	0.0447754	0.0432208	0.115065	0	0	0.0399445
HTRA4	0	0.0245927	0.021264	0	0	0.021097	0	0	0.0416968	0	0.23414	0	0	0.0261077	0.0281037	0.0288491	0.0280209	0.110428	0.121557	0.11936	0.433854	0.0670136	0	0.0340937	0.0173172	0.0471816	0.0885171	0	0	0	0	0	0.0396497	0.0204747	0.0706277	0.0222524	0.0999267	0.0899101	0.0752829	0	0	0.0170022	0.232868	0.131868	0.050916	0.0677757	0	0	0
ENSG00000258933	0	0	0	0	0	0	0	0	0	0	0	0	0	0	0	0	0	0	0	0	0	0	0	0	0	0	0	0	0	0	0	0	0	0	0	0	0	0	0	0	0	0	0	0	0	0	0	0	0
PMEPA1	0.803269	3.21838	1.41913	18.0486	0.477343	3.61042	6.07988	23.6699	0.575214	0.97221	0.552883	1.54916	0.591938	0.730054	2.68243	0.989565	3.51031	1.44926	4.45963	1.7712	0.938203	1.38253	1.19912	0.266943	7.2443	1.59494	3.28049	1.20696	3.23912	0.919751	1.35785	1.27756	1.01264	1.26721	49.1725	0.779884	3.00849	16.5935	102.89	1.25305	3.16117	0.576862	0.444967	0.835823	1.24343	1.62989	1.57467	1.40177	4.02648
ENSG00000239572	0.173305	0	0	0	0	0	0	0	0.22808	0	0	0	0.100981	0	0	0	0	0	0	0	0	0	0	0	0	0	0	0	0	0	0	0	0	0	0	0	0	0	0	0	0	0	0	0	0	0	2.42895	0	0
MMP2	2.89293	11.8334	10.9361	16.4468	0.996827	5.32205	6.87397	8.6031	0.584372	1.33541	3.4361	3.25771	0.282246	3.12673	2.86449	2.31562	9.55587	2.31674	6.63885	4.91705	3.18759	4.73386	2.88473	0.282346	20.3425	7.40055	16.7587	5.9878	19.0163	0.62436	2.55136	1.64253	4.13394	0.617374	57.2304	4.20542	10.8111	0.903688	17.105	4.55321	1.70618	2.094	1.1744	2.90097	2.24885	4.70614	3.38614	1.14374	10.9315
SLCO4A1	0	0.050873	0.197942	0.150962	0.312661	2.193	0.203398	0.76389	0.129383	0.0297467	0.174903	0.0890029	0.381887	0.0540071	0.363349	0.0596779	0.0434735	1.2678	0.0251455	0.0370367	0.179496	0.069313	0.226204	0.132238	0.734368	0.0650674	0.604259	0.110687	0.169542	0.154637	1.14293	0.157906	0.0820204	0.158829	0.535709	0.0920637	0.129194	0.0309984	1.82985	0.344739	4.67792	0.0527568	0.0752681	0.340983	0.0921603	0.0525759	0.122477	0.0551587	2.15369
P2RY13	0.792477	0.205043	0.370696	0.590013	0.134778	0.463729	0.275175	0.365577	0.948134	0.334249	0.532406	0.14908	0.139926	0.356195	0.852057	0.371729	0.467251	1.22201	0.405394	0.542821	0.263075	0.744973	0.312029	0.142129	0.984432	0.715235	0.576995	0.141947	1.05607	0.11332	1.34481	0.257146	0.961692	0.279342	0.588863	1.26498	0.511247	0.159013	0.456491	2.69472	0.579125	1.26293	1.1914	0.899557	1.40862	0.719197	0.523558	0.626527	1.97951
ENSG00000250103	0	0	0	0	0	0.0531228	0	0	0	0	0	0	0	0	0	0	0	0	0	0	0	0	0.0647872	0	0	0	0	0	0	0	0	0	0	0	0.0592809	0	0	0	0.0631882	0	0	0	0	0	0	0	0	0	0
CTD-2410N18.1	0	0	0	0	0	0	0	0	0	0	0	0	0	0	0	0	0	0	0	0	0	0	0	0	0.0832101	0	0	0	0	0	0	0	0	0	0	0	0	0	0	0	0	0	0	0	0	0	0	0	0
SMCO4P1	0	0	0	0	0	0	0	0	0	0	0	0	0	0	0	0	0	0	0	0	0	0	0	0	0	0	0	0	0	0	0	0	0	0	0	0	0	0	0	0	0	0	0	0	0	0	0	0	0
RP11-383J24.2	0.135461	0.105146	0.0909143	0.20801	0	0.0902003	0	1.03108	0	0	0	0	0	0	0	0.123344	0	0.188854	0.103943	0	0	0	0	0	0	0	0	0	0	0.106536	0	0	0	0.175079	0.201313	0.0951404	0	0	0.107291	0	0	0	0	0	0	0	0	0	0
ENSG00000257060	0	0	0	0	0	0	0	0	0	0	0	0	0	0	0	0.0493109	0	0	0	0	0	0	0	0	0	0	0	0	0	0	0	0	0	0	0.107309	0	0	0	0.0285954	0	0	0	0	0	0	0	0	0	0
POU2F2	0.238575	0.150462	0.125093	0.103035	0.0669485	0.278007	0.0996683	0.184431	0.255108	0.0992583	0.195898	0.127278	0.1477	0.288745	0.284367	0.278332	0.151655	0.265049	0.125858	0.359515	0.265439	0.194487	0.145307	0.0561591	0.224124	0.144332	0.183298	0.0944327	0.411436	0.404582	0.32961	0.119749	0.35921	0.120449	0.365633	0.18327	0.305684	0.0705237	0.77356	0.882347	0.028999	0.260056	0.465775	0.279274	0.29354	0.382766	0.376169	0.150588	0.465067
CCT7P2	0	0	0.0612765	0	0	0	0	0	0.120158	0	0	0	0	0	0	0.0415673	0	0	0	0	0	0.0965567	0	0.024562	0	0	0	0	0	0	0	0	0.0285647	0	0	0	0.0359949	0	0.0361572	0	0	0	0.083882	0	2.16419	0	0	0	0.0339006
ALX1	0	0.178276	0	0	0	0	0	0.218524	0.0604531	0	0	0	0	0	0	2.13313	0	0	0	0	0	0	0	0	0	0	0	0	0	0	0	0	0	0	0.341327	0	0	0	0	0	0	0	0	8.10629	0	0	0	0	0
ENSG00000279003	0.00228678	0	0.0122781	0	0	0.00152271	0.00218362	0	0	0	0	0	0	0	0	0.00208223	0	0	0	0	0	0	0	0	0	0	0	0	0.00197184	0	0	0	0	0	0	0	0	0.00432628	0	0.00200472	0	0	0	0	0	0	0.00427335	0	0
CTD-2542C24.14	0	0	0	0	0	0	0	0	0	0	0	0	0	0	0.0270824	0	0	0	0	0	0	0	0	0	0	0	0	0	0	0	0	0	0	0	0.0453742	0	0	0	0.0241824	0.0267659	0	0	0	0	0	0	0.0190185	0	0
ENSG00000226091	0.023442	0.00909794	0.00786651	0	0.0920955	0.0468283	0.0111923	0.0111519	0	0.0283722	0.028873	0	0	0.0386337	0.0311904	0.0213451	0.103662	0.0817043	0.00899386	0.00883135	0.0802511	0.00826379	0.0380738	0	0.0128128	0.0174546	0.117887	0.0197948	0.0505338	0.0276547	0.0115154	0.0251016	0.0146682	0.0378725	0.0348379	0.00823217	0.0369674	0.0221745	0.120686	0.102753	0.0820625	0.0503191	0.0107685	0.0585409	0.0659264	0.137903	0.0511077	0.0295931	0.0609289
CCL7	0	0	0	0	0	0	0	0	0	0	0	0.059684	0	0	0.0682238	0	0	0.0536143	0	0.173854	0	0	0	0	0	0	0.0429765	0	0	0	0	0	0	0	0	0	0	0	0	0	0	0	0	0.0640241	0	0	0	0	0
IL22RA2	0	0	0	0	0	0	0	0	0	0	0	0	0	0	0.040647	0	0	0	0	0	0.0313747	0	0	0	0	0	0	0	0	0	0	0	0	0	0	0	0	0	0	0.080344	0	0	0.0210501	0	0	0	0	0	0
ENSG00000272154	0.376068	0	0	0	0	0	0	0	0	0	0.411729	0	0	0	0	0	0	0	0	0	0	0	0	0	0.890717	0	0	0	0	0.0492944	0	0.0671154	0	0	0.512312	0.132065	0.0988415	0.118578	0.148931	0	0	0	0	0.104349	0	0	0	0	0
ENSG00000249203	0	0	0	0	0	0	0	0	0	0	0	0	0	0	0	0	0	0	0	0	0	0	0	0	0	0	0	0	0	0	0	0	0	0	0	0	0	0	0	0	0	0	0	0	0	0	0	0	0
TANC2	0.0609593	0.205041	0.29613	1.26592	0.192242	0.753839	0.252241	3.05742	0.0534841	0.0316201	0.16685	0.0968605	0.0439764	0.0837203	0.481502	0.256388	0.118095	0.418863	2.44794	0.155289	0.0675751	0.251733	0.0471468	0.0734068	4.03635	0.206054	0.335754	0.0906941	0.160195	0.0684897	0.627419	0.158525	0.432296	0.0825398	3.39941	0.16718	0.643164	0.0741387	7.29523	0.145053	2.10462	0.109043	0.114678	0.142566	0.296225	0.145927	0.343557	0.0903915	0.575563
RP11-97N10.1	0	0	0	0	0	0	0	0.085923	0	0	0	0	0	0	0	0	0	0	0	0	0	0	0	0	0	0	0	0	0	0	0	0	0	0	0	0	0	0	0	0	0	0	0	0	0	0	0	0	0
ENSG00000258897	0.215506	0	0	0	0	0	0	0	0	0	0	0	0	0	0	0	0	0	0	0	0	0	0	0	0	0	0	0	0	0	0	0	0	0	0.320271	0	0	0.407709	0.17069	0	0	0	0	0	0	0	0.134241	0	0.160037
ICOS	0.376423	0.233747	0.28632	0.308279	0.0563367	0.0167101	0.0239629	0.0477531	0.0990791	0.0607456	0.144241	0.0584203	0.0584886	0.165431	0.267118	0	0.15536	0.297382	0.231073	0.264713	0.756005	0.0530788	0.0407584	0.0135021	0.123447	0.137026	0.112177	0.275477	0.302943	0.473674	0.0493093	0.0537431	0.157025	0.0162172	0.503473	0.0881262	0.158296	0.0237381	0.178886	0.527992	0	0.0269336	0.253612	0.564017	0	0.134206	0.828486	0	0.279536
PDHA2	0	0	0.0917885	0	0	0	0	0	0.0599964	0	0	0	0.0531258	0	0	0	0.0403185	0	0	0	0	0	0.0740425	0.0245283	0.0747519	0	0	0	0	0.0358536	0	0	0	0	0	0	0	0	0	0	0	0	0	0	0	0	0	0	0
ENSG00000236039	0	0.345011	0.596625	0.227511	0.332613	0.0493283	0	0.211451	1.16993	1.65872	0.304144	0.459886	10.4459	0.85462	0.197133	1.21417	0.196553	0.516397	1.08004	0.279084	0.507212	3.18601	1.74463	0.159434	0.0404906	2.42701	1.3246	1.00087	0.511023	0.233048	0.291123	15.5477	0.788016	0.718099	1.5413	0.780448	0.350468	0	0.293374	0.454603	1.61361	0.238525	0.204182	0.30833	1.72623	1.74318	1.75352	0.249384	0.440103
ENSG00000273002	0.400041	0.262744	0.0619583	0	0.0690823	0.327849	0.0587686	1.43464	0.24299	0	0.0758033	0.0238791	0.071721	0.0253573	0.0272959	0.112079	0.136077	0.107253	0	0.0463717	0.126415	0.0650874	0.0499796	0	0.0168195	0.0916509	0.120362	0.0519694	0.159206	0.0968063	0.0604651	0.065902	0.11553	0.0596585	0.525915	0.0216128	0.0242636	0.0582172	0.121865	0.134884	0	0.033027	0.735066	0	0.0247262	0.362052	0.210852	0.0517959	0.0914075
GPRC5D	0.472427	0.137513	0.317068	0.181361	0.662858	0.275255	0.112779	1.17991	0.233153	0.250157	0.630368	0.1833	0.550542	0.340631	0.5762	0.322627	0.313365	0.370483	0.0906268	0.177978	0.566056	0.333081	0.383651	0.127093	0.484158	0.117254	0.56095	0.199462	0.203682	0.0928876	0.580174	0.0632342	0.0739023	0.114487	0.570447	0.539185	0.372502	0.0558605	0.608046	0.258848	0.137817	0.285211	0.759565	0.245787	0.189802	0.126326	2.35423	0.397594	0.131561
R3HDM2P2	0	0.0243486	0	0	0	0	0.0299536	0	0	0.018983	0	0	0	0	0	0	0	0	0	0	0	0	0	0	0	0	0	0	0	0	0	0	0	0	0	0	0	0	0	0	0	0	0	0	0	0	0	0	0
FXYD3	0.199088	0.108174	0	0.489141	0.0446942	0.649583	0.266151	0.227307	0.0786036	0.132528	0.0490425	0	0	0.672622	0.211915	0.018128	0.123253	0.333071	0.244426	0.0450017	0.109049	1.92301	0.0808383	0.396337	0.0435268	0.711545	0.244736	0.134491	5.27026	0.579335	0.0977978	0.12791	0.087202	0.707617	1.06514	0.0139828	0.910474	0.621469	2.1603	0.191986	0.185851	0.0106838	0.036582	0	0	0.596239	1.27734	0.150797	0
SCAND3P1	0	0	0	0	0	0	0	0	0	0	0	0	0	0	0	0	0	0	0	0	0	0	0	0	0	0	0	0	0	0	0	0	0	0	0	0	0	0	0	0	0	0	0	0	0	0	0	0	0
KSR2	0	0.00281631	0.0121756	0.0167144	0.012218	0.149791	0	0.24165	0.095501	0.00219569	0	0.00281553	0.00422823	0	0.00965516	0.00330375	0.00641781	0.0075876	0	0.0136689	0	0.0179067	0	0	0.00396628	0.00900527	0	0.00306379	0.0093858	0.00285355	0	0.0116555	0	0.0234473	0.0700975	0	0.0143043	0.120124	0.229901	0.00318078	0	0	0.0200007	0	0.0174924	0.00388078	0.049722	0.00305357	0.00808323
HMGA1P8	0	0	0.138779	0	0.232104	0.137689	0	0.19674	0	0	0	0	0	0	0	0	0	0.144141	0	0	0	0	0	0.222512	0.113021	0	0.115541	0	0	0	0	0.442836	0	0	0.15365	0	0	0	0.818887	0	0	0	0	0.172127	0	0.663505	0.386412	0	0
SLN	0	0	0	0	0.575648	0.0487838	0	0	0	0.310349	0	0	0	0	0	0	0	0.0510697	0	0	0	0	0	0.078837	0	0	0.0818735	0	0	0.057619	0.215932	0	0	0	0.054439	0	0	0.207905	0.0580271	0	0	0	0	0	0	0	0.0912718	0	0
TMEM161BP1	0	0	0	0	0	0	0	0	0	0.027569	0.0374074	0	0	0	0	0	0	0	0	0	0	0	0	0	0	0	0	0	0	0	0	0	0	0.0294402	0.0338516	0	0	0	0	0.0399376	0	0	0	0	0	0	0	0	0
SPINK4	0.304477	0	0	0	0	0	0	0	0.13357	0	0.0833373	0	0	0.167265	0	0	0.179522	0.070748	0	0.152942	0	0	0	0	0.16642	0.0503799	0	0	0	0	0.0997119	0	0	0.0655878	0.150831	0	0.240076	0	0	0.978716	0	0	0	0	0	0	0.252881	0	0.0753693
ENSG00000226125	0	0.0197477	0.0170748	0	0	0.0169406	0	0	0.0669642	0	0	0.0197421	0	0	0	0	0	0	0	0.057507	0	0	0	0	0	0.0126288	0	0	0.0658121	0.0200087	0	0	0.0159192	0	0.0567134	0	0	0.0240656	0	0	0.0197913	0.0136526	0.0233738	0	0	0.0272116	0	0	0.0377858
DEFB133	0	0	0	0	2.80396	0	0	0	0	0	0	0	0	0	0	0	0	0	0	0	0	0	0	0	0	0	0	0	0	0	0	0	0	0	0	0	0	0	0	0	0	0	0	0	0	0	0.222291	0	0
SFRP2	0	0	0	0.0501598	0	2.82764	0	0.186477	0	0.0395354	0	0	0	0.215337	0.0869249	0.0892305	0	0.227703	0	0	0	1.24364	0	0	0	0	1.40543	0	0.5915	0	0	0.34978	0.163516	0	0.0728175	0	2.34381	0.0926977	2.27676	0.0286364	0.0508224	0.0350587	0	0.299105	0.0262473	0	0.203475	0	0
ENSG00000275852	0	0	0	0	0	0	0	0	0	0	0	0	0	0	0	0	0	0	0	0	0	0	0	0	0	0	0	0	0	0	0	0	0	0	0.0785378	0	0	0	0	0	0	0	0	0	0	0	0	0	0
ENSG00000259834	0.152545	0.0888049	0.0895824	0.351364	0.0856136	0.0888788	0.0546239	0.0725693	0.0501895	0.0230784	0.344458	0.295934	0.0444419	0.0785631	0.202966	0.0694499	0.101184	0.34559	0.336524	0.287342	0.496109	0.376426	0.0309698	0.0205189	0.187599	0.369144	0.39422	0.161014	0.542586	0.164962	0.149869	0.428779	0.298284	0.0492898	0.524247	0.200885	0.902096	0.0360743	0.135924	0.651932	0.118668	0.194419	0.402928	0.190472	0.398362	0.12237	0.344452	0	1.00537
RP11-324J13.3	0	0	0	0	0	0	0	0	0	0	0	0	0	0	0	0	0	0	0	0	0	0.16654	0	0	0	0	0	0	0.203682	0	0	0	0	0	0	0	0	0	0.187091	0	0	0	0	0	0	0	0	0	0
RP11-81M19.3	0	0	0	0	0	0	0	0	0	0	0	0	0	0	0	0	0	0	0	0	0	0	0	0	0	0	0	0	0	0	0	0	0	0	0	0	0	0	0	0	0	0	0	0	0	0	0	0	0
ENSG00000235005	0	0	0	0	0	0	0	0	0	0	0	0	0	0	0	0	0	0	0	0	0	0	0	0	0	0	0.247258	0	0	0	0	0	0	0	0	0	0	0	0	0	0	0	0	0	0	0.4733	0.183761	0	0
GPR65	0.352283	0.113936	0.275839	0.360636	0.0988571	0.244351	0.0981144	0.153624	0.289766	0.213187	0.771377	0.273369	0.273688	0.447532	0.468726	0.0935585	0.272618	0.521833	0.540634	1.02855	0.824102	0.455353	0.345685	0.0868742	0.489397	0.364313	0.319871	0.285079	0.620189	0.253972	0.504734	0.424377	0.495972	0.208686	0.9271	0.412373	0.486098	0.0694242	0.627801	1.14525	0.137025	0.504126	0.782169	0.488747	0.271272	0.675096	0.374876	0.259421	1.09004
CEACAM18	0	0	0	0	0.0504778	0	0	0	0	0	0	0	0	0	0	0	0	0	0	0	0	0	0	0	0	0	0	0	0	0	0	0	0	0	0	0	0	0	0	0	0	0	0	0	0	0	0	0	0
CYCSP2	0	0	0	0	0	0	0	0	0	0	0	0	0	0	0	0.200793	0	0	0	0	0	0	0	0	0	0	0	0	0	0	0	0	0	0	0.16386	0	0	0	0	0	0	0	0	0	0	0	0	0	0
ENPP7P11	0	0.0821717	0	0	0.118828	0	0	0	0	0	0	0	0.246734	0	0.093903	0	0	0.0737945	0	0	0	0	0	0.0569588	0	0	0	0	0	0	0	0	0	0	0	0.297408	0	0.100139	0	0	0	0.0568097	0	0	0	0.11323	0	0.089094	0
FAM172BP	0.0609513	0.047311	0	0	0	0	0	0	0	0	0.0500483	0	0	0	0	0	0	0	0	0	0	0	0	0	0	0	0	0	0.105114	0	0	0	0	0	0	0	0	0	0	0	0	0	0	0	0	0	0.0379671	0	0
ENSG00000272788	0	0	0	0	0	0	0	0	0.134392	0	0	0	0	0	0	0	0.0903134	0.21355	0.0783573	0	0.279669	0	0.0829276	0	0.0558148	0.05069	0	0	0	0.080312	0	0	0	0.263966	0.303518	0	0	0.0965958	2.1029	0	0	0	0	0	0	0	0.190828	0	0
FGF1	0.100665	0.332083	0.118232	0.386444	0.0282484	0.142439	0.0961242	0.790166	0.463684	0.510191	0.103322	0.273403	0	0.0933196	0.2902	0.183321	0.289345	0.105257	0.12552	0.0474047	0.0516924	0.461325	0.132841	0.074473	0.206329	0.293569	0.379676	0.106254	0.314655	0.0197925	0.284335	0.229058	0.33069	0.0487899	0.682556	0.273968	0.7342	0.0238056	0.837174	0.09928	0.0978873	0.216081	0.0809243	0.0418979	0.889751	0.148046	0.0548669	0.465957	0.242953
RP11-666A1.4	0	0	0	0	0	0	0	0	0	0	0	0	0	0	0	0	0	0	0	0	0	0	0	0	0.137423	0	0	0	0.216798	0	0	0	0	0	0	0	0	0	0	0	0	0	0	0	0	0	0	0	0
ENSG00000253522	0.548085	0.179128	0.193603	0.0885917	0.0323795	0.0384165	0	1.34486	0.455566	0	0.047373	0.0447694	0.168082	0.0713112	0.153526	0.0787989	0.127561	0.180975	0.110674	0.0869395	0.513517	0.142366	0.117129	0	0.0315338	0.300703	0.0805925	0.048717	0.174117	0.204183	1.07694	1.05022	0.16245	0	0.235784	0.0202602	1.27373	0	0	0.227598	0	0	0.874582	0.432225	1.62252	0.123416	0.14375	0.0242772	0.0642653
LPCAT2BP	0	0	0	0	0	0	0	0	0	0	0	0	0	0	0	0	0	0	0	0	0	0	0	0	0	0	0	0	0	0	0	0	0	0	0	0	0	0	0	0	0	0	0	0	0	0	0	0	0
ENSG00000236724	0	0	0	0	0	0	0	0	0.718969	0	0	0	0	0	0	0	0	0	0	0	0	0	0	0	0	0	0	0	0	0	0	0	0	0	0	0	0	0	0	0	0	0	0	0	0	0	0	0	0
ENSG00000232023	1.47284	5.79237	4.01987	0	6.61289	0	0.18752	0.467111	0	0.17826	0.806251	0	0.114425	0.0809107	0	0.0894065	5.90511	0.0684455	0.150687	0	0	0	0	0	0.053668	0	0	0	0.0846666	0.0772231	0	0	0.0614395	0	0.0729611	0.0689627	0	0.0928805	0	0	0.076384	0.105384	0	0.16347	0.0788972	1.36529	4.34257	0.082636	0
GULP1	0.0166231	0.051612	0.520638	0.0510517	0.0621966	0.00368964	0.0158733	0.0790802	0.0510463	0.0067064	1.21481	0.0816961	0	0.00913192	0.496418	0.00504539	0	1.96989	0.00850359	0.0375747	0	0.214866	0	0.0119253	0.090858	0.0165031	0.108365	0.00935787	0.0764466	0.200462	0.0544383	0.0711998	0.0173358	0.017904	0.102934	0.0194585	0.0611664	2.2381	11.0596	0.00971519	9.93572	0.011894	0.0610891	0.202949	0.0979513	0.0355597	1.30469	0.00932664	0.0329186
RP11-179H18.5	0.105863	0.0821717	0.142099	0	0	0.211474	0	0	0	0.128128	0.260778	0	0.246734	0.0872339	0	0	0	0	0	0	0	0.149275	0.0859696	0.0569588	0.173587	0.0525494	0.354916	0	0	0.499549	0	0	0	0.0684122	0.078663	0	0.166943	0.200278	0.0838478	0.0928056	0	0.113619	0.972603	0.264368	0.170126	0	0	0.089094	0
ENSG00000260422	0	0	0	0	0	0	0.0386711	0	0	0	0	0	0	0	0	0	0	0	0	0	0	0	0	0	0.0221352	0	0	0	0	0	0	0	0	0	0	0	0	0	0.032076	0	0	0	0	0	0	0	0.0252264	0	0
TMEM95	0	0	0	0	0	0.0361096	0	0	0	0	0.0445283	0	0	0.044686	0.0481022	0	0	0	0	0	0	0	0	0	0	0	0	0	0	0	0	0	0	0	0	0	0	0	0	0	0	0	0	0	0	0	0	0	0
ENSG00000256982	0	0.0239191	0	0	0	0	0	0	0	0	0	0	0	0	0.0820016	0	0	0	0	0	0	0	0	0	0.101057	0	0	0	0	0	0	0	0	0	0	0	0	0	0	0	0	0	0	0	0	0	0	0	0
ENSG00000237751	0.106202	0	0	0	0	0.070717	0	0.101045	0	0	0	0	0	0.0875131	0.753627	0	0	0	0	0	0	0	0.0862447	0	0.232189	0	0	0	0	0	0	0	0	0	0.394574	0.07459	0.753647	0	0	0	0	0	0	0	0	0	0	0	0
ENSG00000260756	0	0	0.0339284	0	0	0	0	0	0	0	0	0.0392287	0	0	0	0	0	0.0352393	0	0	0	0.0356419	0	0.0543994	0	0	0	0	0	0	0	0	0	0	0	0	0	0	0	0	0	0	0	0	0.0406203	0	0.0314898	0	0
ENSG00000234426	0	0	0.146059	0	0	0	0	0	0.859227	0	0	2.36427	2.28249	0	0	0	0	0	0	1.47576	0	0.613742	0	0	0	0	0	0	0	0.51347	0	0	0	0	0	0.305697	0	0	0	0	0	0	0	1.63041	0.174867	0.931082	12.6072	0	0
FCGR1B	0.0588614	0.0609183	0.0131682	0	0.0220234	0.0391943	0.0749416	0.0373358	0.0258217	0	0.0805536	0.045676	0.0457293	0.0323356	0.0348077	0.0357309	0.0520577	0.0820618	0.0150553	0.206966	0.161204	0.0276665	0.0159335	0.0422266	0.139413	0.107134	0.0328898	0.0994069	0.338366	0.108016	0.0771051	0	0.012277	0	0.131214	0.0551212	0.0464114	0.0556789	0.202023	0.154804	0	0.0421161	0.0540782	0.0979949	0.0788272	0.167887	0.0733304	0.0165125	0.145704
ENSG00000255693	0	0	0.0112212	0	0	0	0	0	0	0	0	0	0	0	0.0593221	0	0	0	0	0	0	0	0	0	0	0	0	0	0	0	0	0	0	0	0	0	0	0	0	0	0	0	0	0	0.0134344	0	0.0104146	0	0
ENSG00000259747	0	0	0.0546602	0	0	0	0.0777692	0	0	0	0.0668743	0	0	0	0	0	0	0	0.0624935	0	0	0	0	0	0	0	0.0455076	0	0	0.192158	0	0	0	0	0	0	0	0	0	0	0	0	0	0	0	0	0.0507314	0	0.0604804
ENSG00000253171	0	0	0	0	0	0	0	0	0	0	0	0	0	0	0	0.0934139	0	0	0	0	0	0	0	0	0	0	0	0	0	0	0	0	0	0	0.152463	0	0	0	0	0	0	0.0550536	0	0	0	0	0	0	0
HOXA11	0.460345	0	0.0579298	0.0441806	0.0645906	0.0191583	0	0.0547494	0	0.0174114	0	0	0	0.0474171	0.433859	0	0	0.10028	0.0220773	0	0.0393985	0.0405703	0	0	0.0314517	1.01402	0	0	0.0496182	0.022628	0.0282668	0.21566	0	0.0743727	0.0855166	0.0404151	0.022686	0.870911	0	0.0252229	0	0	0	0.0718502	0.0231185	0.0615475	0.26883	0	0
ENSG00000259504	0	0.525136	0.151352	0	0	0.450491	0.0717802	0.929779	0	0	0	0	0.0876004	0	0.0666785	0	0	0.0524	0.288405	0	0.102936	0	0	0	0.0410867	0	0.042003	0	0	0	0.147705	0	0	0	0.111714	0	0	0.0711067	0	0	0	0	0	0	0.120803	0.0804021	0.0936492	0	0.614051
AC073900.4	0	0	0.0574073	0	0.0960119	0	0	0	0	0	0	0	0	0	0	0	0	0	0	0	0	0	0.0694626	0	0	0	0	0	0.073756	0	0	0	0	0	0	0	0.067444	0.242734	0	0	0	0	0	0	0	0	0	0.071987	0
ENSG00000234695	0	0.391056	0.0845314	0	0.706881	0	0	0	0.497276	0	0	0.29321	0.587106	0	0	0	0.222785	0	0	0	0	0	0	0.0677669	0	0	0	0	0	0.0990566	0	0	0	0	0	0	0	0	0.199516	0	0	0	0	0.209688	0	0.134715	0.392278	0	0.0935323
OR7C2	0	0	0	0	0	0	0	0	0	0	0	0	0	0	0	0	0	0	0	0	0	0	0	0	0	0	0	0	0	0	0	0	0	0	0	0	0	0	0	0	0	0	0	0	0	0	0	0	0
KRT80	0	0.153973	0.819274	0.257741	0.0342553	0.284494	0.160276	0.435541	0.220897	3.99833	0	0.0118407	0.0177819	0.0502949	0.13535	0.0972578	0.0269902	0.0319098	0.0351257	0.022994	0.0208948	0.17213	0.0123915	0.147779	0.00834014	0.181785	0.179049	0.0515393	0.407879	0.0120006	0.089947	0.179731	0.00954783	0.00986079	7.97084	0.0643018	0.445162	0.158772	26.0204	0.120391	0.0593512	0.00818843	0	0.0254036	0.0367824	0.783393	0.0570291	0.449464	0.0113314
ENSG00000116883	0.397245	1.00913	0.678643	0.221817	0.20268	0.553078	0.655199	0.377959	0.570325	0.327813	0.0889596	0.364306	0.252506	0.565407	0.576599	0.460361	0.191633	0.402778	0.332528	0.19047	1.38465	0.330997	0.351924	0.194305	0.592159	1.00387	0.322861	0.0914836	0.747351	0.454432	0.319317	0.309359	0.338953	0.536764	0.831868	0.177547	1.05357	0.409928	3.23215	0.474884	0.140467	0.891461	0.398143	0.931903	0.348212	0.463515	0.989788	0.395106	0.643632
CD3D	5.50156	2.77296	2.6374	2.74286	3.12778	1.95062	0.272904	3.19506	1.59853	1.12419	7.09883	2.16231	2.58115	5.00445	2.4717	3.57818	3.8546	3.38676	5.31801	3.33772	13.4039	1.36011	3.30729	0.691967	1.83546	3.0856	1.91631	1.62898	14.3549	17.3073	1.96547	0.306029	5.18605	3.27826	7.53895	1.60581	4.33791	48.459	3.28225	12.2767	0.0555819	1.26528	7.48329	3.92539	0.86116	6.64862	7.12097	1.56341	6.57928
ENSG00000205537	0	0	0	0	0	0	0	0	0	0	0	0	0.0601019	0	0.0457476	0	0	0	0	0	0	0	0	0	0	0	0.0576359	0	0	0	0	0	0.0322712	0.033329	0	0	0	0	0	0.045213	0	0	0	0	0	0	0.0642519	0	0
BCAS2P2	0.0984807	0	0.13219	0	0	0.131152	0.0940384	0	0	0	0	0	0	0	0	0.0896718	0	0.0686486	0	0	0	0	0	0	0	0.048885	0	0	0.0849179	0	0	0	0	0	0	0	0.155301	0	0	0	0	0	0	0	0	0	0.184033	0	0.585062
OR6D1P	0	0	0	0	0	0	0	0	0	0	0	0	0	0	0	0	0	0	0	0	0	0	0	0	0	0	0	0	0	0	0	0	0	0	0	0	0	0	0	0	0	0	0	0	0	0	0	0	0
TTLL6	0.0651128	0.0202165	0.166061	0.019997	0.0292349	0.0260142	0	0.0371709	0.0514154	0.236421	0.0962376	0.0303162	0.0303516	0.010731	0.0115513	0.0948617	0.0115173	1.87909	0.0199852	0	0.0891627	0.137722	0.0317263	0.0210201	0.00711783	0.31675	0.0582126	0	0.0673745	0	0.588529	0.348613	0.0896339	0.336625	0.0387065	0.210365	0.256703	0	0.742638	0.216911	0.070914	0.00698836	0.346966	0.0216805	0.136031	0.0139288	0.178461	0	0.0967069
ENSG00000236627	0	0	0	0	0	0	0	0	0	0	0	0	0	0	0	0	0	0	0	0	0	0	0	0	0	0	0	0	0.0510113	0	0	0	0	0	0	0	0	0	0	0	0	0	0	0.0492449	0	0	0	0	0
MARK2P13	0	0	0	0	0.0805898	0	0	0	0	0	0	0	0	0	0.0318427	0	0	0	0	0.0270481	0	0	0	0	0	0	0	0	0	0	0	0	0	0.115994	0.0533496	0.100852	0	0	0.028433	0	0	0.0192643	0	0	0	0	0	0	0.0799754
ENSG00000275465	0	0.0193545	0.0167348	0	0	0.0332067	0	0.948962	0	0	0.0204743	0	0	0	0	0	0	0	0	0	0	0.0175799	0	0	0.0136287	0	0	0	0	0	0	0	0	0	3.6315	0.0175127	0	0	0	0	0	0	0	0	0	0	0	0	0.166651
SBK3	0	0.0338958	0	0	0.0980332	0.0290777	0.0416986	0.0830966	0	0.528526	0	0.0338864	0	0	0	0	0	0	0.268064	0.0987078	0	0.030788	0	0.093982	0.119341	0.0216766	0.0976018	0.0737486	0.0753087	0	0.171609	0.0935201	0.68311	0	0.259588	0	0.0688639	0	0.0345872	0	0.237795	0.023434	0.0401199	0.0727011	0.0350885	0	0.0272014	0	0.227
ADAM18	0.0173532	0	0	0	0	0	0	0	0	0	0	0	0	0	0	0	0	0	0	0	0	0.0122347	0	0	0	0	0	0	0	0	0	0	0	0	0	0	0	0	0	0	0	0	0	0	0	0	0.0108094	0	0
RP11-762B21.5	0	0	0	0	0	0	0	0	0	0	0	0	0	0	0	0	0	0	0	0	0	0	0	0	0	0	0	0	0	0	0	0	0	0	0	0	0	0	0	0	0	0	0	0	0.117477	0	0	0	0
ENSG00000255542	0	0	0	0	0	0	0	0	0	0	0	0	0	0	0	0	0	0	0	0	0	0	0	0	0	0	0	0	0	0	0	0	0	0	0	0	0	0	0	0	0	0	0	0	0	0	0	0	0
FCGR3A	6.60767	3.44907	3.44579	6.22225	18.6586	4.44588	6.00182	3.00105	5.81759	3.81756	10.5867	5.37762	6.22458	6.86779	7.33156	1.78193	92.2196	12.4861	2.61463	27.131	13.462	10.9406	1.7949	3.01016	21.5689	12.1257	5.27449	7.46542	4.06975	21.3664	31.2826	1.72573	3.97611	12.6318	22.4796	12.2247	5.26452	5.09615	31.1825	20.7285	2.32835	12.3056	7.31871	8.35596	3.14494	13.7902	103.76	4.49531	20.1406
IL17B	0.0548109	0	0	0	0	0.0729944	0.0523385	0.0521498	0	0	0.0450063	0	0.0638738	0	0.0972372	0.0499082	0.145426	0.0382074	0.042058	0.165192	0	0	0	0.0294906	0.0898751	0.0544153	0.061253	0.0925664	0	0	0	0	0	0.106262	0.122184	0	0	0	0.130238	0.0480505	1.83347	0	0.151071	0.0456258	0	0.293126	0.0341421	0.0461288	0
RP11-520P18.5	0	0	0	0	0	0	0	0	0	0	0	0	0	0	0	0	0	0	0	0	0	0	0	0	0	0	0	0	0	0	0	0	0	0	0	0	0	0	0	0	0	0	0	0	0	0	0	0	0
RNF175	0.0453594	0.0352084	0.0101476	0.046435	0	0.0604075	0	0.1007	0.0198986	0.00914989	0.111737	0.0586643	0.0352397	0.14951	0.0938816	0.0137674	0.0401164	0.115936	0.0696113	0.0569612	0.0207044	0.0319803	0.0491143	0	0.0743773	0.0525374	0.076036	0.0127674	0.182525	0.0594565	0.0148546	0.0161903	0.236521	0.127022	0.0674101	0.0424772	0.0476871	0.0572093	0.0479021	0.119294	0	0.0405691	0.12502	0.100688	0.0850436	0.016172	0.103601	0.101798	0.0112281
ENSG00000261156	0	0	0.0346947	0	0	0	0	0	0	0	0	0.0401147	0	0	0	0	0	0	0.0396669	0	0	0.0364469	0	0	0	0	0	0	0	0	0	0	0	0	0	0	0	0	0	0	0	0	0	0	0	0	0	0	0
FOXD4L6	0	0	0	0.0501105	0	0.0217297	0	0	0	0	0	0	0	0	0	0	0	0.0227479	0	0	0	0	0	0	0	0	0.0182344	0	0.028139	0	0	0	0	0	0.0484973	0	0	0	0.0258469	0	0	0	0	0	0	0.0349041	0	0	0
ENSG00000249781	0	0	0	0	0	0.0177717	0	0	0	0	0	0	0	0	0	0.0243019	0	0	0	0	0	0	0	0	0.0145877	0.0132483	0	0	0	0	0	0	0	0	0	0	0	0	0.0211389	0	0	0	0	0.0222167	0	0	0	0	0
GPR37L1	0.241807	0.0391026	0.03381	0.0773563	0.0678554	0.100633	0.048104	0.0287584	0.437569	0.231692	0.256463	0.0625468	0.0821885	0.00830232	0.0446852	0.238526	0.0801963	0.695302	0.0850417	0.296063	0.08278	0.042621	0.04091	0.140945	0.0275346	0.110028	0.0675568	0.0340309	0.147691	0.0554675	0.0197971	0.053943	0.195435	0.06511	0.344384	0.148603	0.0397211	0.52418	0.279302	0.044163	0	0.00540675	0.203644	0.075482	0.0647656	0.0754349	0.0502078	0.440926	0.0748202
AC015922.7	0	0.280009	0	0	0	0	0	0	0	0	0	0	0	0	0	0	0	0	0.276806	0	0	0.254336	0	0	0	0	0.201569	0	0.311058	0	0	0	0	0	0.268053	0	0	0	0	0	0	0	0	0.300287	0	0	0.224707	0	0
ENSG00000272094	0	0	0	0	0	0	0	0	0	0.0456974	0	0	0.175998	0	0	0	0	0	0	0	0	0	0	0	0	0	0.0421942	0	0	0	0.0741884	0	0	0	0	0	0	0	0	0	0	0	0	0	0	0	0.0470377	0	0
ENSG00000272780	0	0	0	0	0	0	0	0	0	0	0	0	0	0	0	0	0	0	0	0	0	0	0	0	0	0	0	0	0	0	0	0	0	0	0	0	0	0	0	0	0	0	0	0	0	0	0	0	0
ENSG00000229671	0.210717	0	0.141422	0	0	0.140312	0	0.601461	0.554633	0.127517	0.173024	0	0.245559	0	0.186912	0	0.372722	0.146886	0.323379	0.476304	1.15419	0.148565	0.342241	0	0.34552	0.732189	0	0	0.726789	0	0.207021	0	0.263702	0	0.782884	0	0	0	0.667588	0.73891	0	0	0.580783	0	0	1.57767	0	0.177339	0.625924
ENSG00000223542	0	0	0	0	0	0	0	0	0	0	0	0	0	0.0866809	0	0	0	0	0	0	0	0	0	0	0	0	0	0	0	0	0	0	0.065821	0.0679785	0	0	0	0	0.249949	0	0	0	0	0	0	0	0	0	0
ITGAM	0.41009	1.06408	5.0092	0.791648	0.499771	1.02986	0.436345	0.992172	1.11025	2.14844	2.91514	0.363688	3.93241	0.260685	0.228649	0.405415	1.78235	0.80042	0.728246	10.638	2.40668	0.421304	0.466239	0.22695	1.06309	1.20394	6.51425	0.40565	1.60641	0.322524	0.494987	0.715144	1.30501	0.976767	2.82087	0.427922	0.591269	0.421168	5.99504	1.6332	0.30079	0.515589	0.958061	0.419395	1.88295	6.56688	5.40091	1.25233	3.22809
MMP7	0.0285734	4.32489	0.345185	0.351011	0	0.057079	0.136422	12.7775	0.225626	1.17582	0.164235	0.0443455	0.033298	0.0235453	0	0.0780527	0	0.119507	0.0438504	0.150703	0.665162	0.0201454	0.023204	0.0461212	0.0937053	0	0.335283	0	6.5045	0.0674165	0.0561443	0.244771	0.0893953	0.0923255	45.8397	0.0200683	0.0225297	2.75691	23.8534	0.475933	0.555699	0.122668	0	0.428132	0.114797	0.122247	0.231382	1.53903	0.297065
ENSG00000226508	0	0	0	0	0	0	0	0	0	0	0	0	0	0	0	0	0	0	0	0	0	0	0	0.0353946	0	0	0	0	0	0	0	0	0	0	0	0	0.0518698	0	0	0	0	0	0	0	0	0	0	0	0
CHIAP3	0	0	0	0	0	0	0	0.05574	0	0	0	0	0	0	0	0	0	0	0	0	0	0	0	0	0	0	0	0	0	0	0	0	0	0	0	0	0	0	0	0	0	0.0314384	0	0	0	0	0	0	0
PLA2G3	0	0	0	0	0	0.0163879	0	0	0	0	0	0	0	0	0	0.0224096	0.0217663	0	0	0	0.0337013	0	0	0	0.0134518	0	0.0412555	0	0	0	0	0	0	0	0	0.0518563	0	0	0	0	0	0	0	0	0.0593264	0	0	0	0
ENSG00000266728	0	0	0	0	0	0	0	0	0	0	0	0	0	0	0	0	0	0	0	0	0	0	0	0	0	0.0451349	0	0	0	0	0	0	0	0	0.135128	0	0	0	0	0	0	0	0	0	0	0	0.113277	0	0
CPNE4	0.0516384	0	0.0415883	0	0.0115925	0.0137539	0.157789	0.00982627	0.108735	0	0.0763223	0.0080142	0	0.0510618	0	0	0	0.0143984	0	0	0.0282846	0	0	0.00555674	0.0112897	0	0.0173123	0.0261626	0.0445267	0	0	0	0	0.0467187	0	0	0	0.381002	0.0163599	0	0	0.0110844	0.0948844	0	0.0414925	0.0331391	0.0257328	0	0.0153389
CTD-2008P7.5	0	0	0	0	0	0	0	0	0	0	0	0	0	0	0	0	0	0	0	0	0	0	0	0	0.148687	0	0	0	0	0	0	0	0	0	0	0	0	0	0	0	0	0	0	0	0	0	0.508354	0	0
ENSG00000267709	0.223488	0.130105	0	0.0857952	0	0.186019	0	0	0	0.101434	0.0458776	0	0	0	0.0495599	0.0508744	0	0.0389471	0.214361	0	0	0.354529	0.0453729	0	0.244307	0.0832032	0.0936583	0	0.0963546	0.0439418	0	0.0598277	0.0349605	0.0361064	0.0830332	0	0	0.0528512	0	0.146942	0	0.0599658	0.102664	0.418582	0	0	0.0696063	0	0.165965
ENSG00000243486	0	0	0	0	0	0	0	0	0	0	0	0	0	0	0	0	0	0	0	0	0	0	0	0	0	0	0	0	0	0	0	0	0	0	0	0	0	0	0	0	0	0	0	0	0	0	0	0	0
ENSG00000265743	1.62288	1.38567	1.19811	3.98727	1.63948	1.1887	1.23974	1.08087	2.77656	1.76779	3.59797	1.00748	0.567368	2.00595	2.59117	2.95544	1.86589	2.14942	0.99623	5.25798	1.33339	2.51724	1.84509	0.960501	3.28202	2.65844	2.62976	0.959273	2.51888	2.42507	1.75386	3.30178	1.92941	0.943887	3.25596	3.19151	2.81517	0.921084	3.08494	3.12998	0.504993	1.39343	1.34191	0.54037	1.95603	4.51313	1.01091	4.23403	5.06172
RDH8	0	0	1.22446	0	0	0.11044	0	0	0.480211	0.0602219	0	0	0	0	0	0	0	0.716814	0	0	0.408812	0	0	0.0713907	0.0181307	3.68839	0	1.96073	0.028603	0.182619	0.0325895	0	0	0.385857	0.0246485	0	0	0	0	0.02908	0	0.0712037	0	0.0276126	0	0.177399	0.0826509	0	0
C1QTNF1-AS1	0	0.160005	0.092232	0	0	0.0457538	0.0656127	0.0653762	6.05877	2.12067	0.0564209	0	0	0	0.975191	0	0	0.143693	0.158175	0	0	0.0484449	0	0	0.338009	0.0682163	0.422335	0	0.592491	0	0.0675068	0.147154	3.78355	0.133213	0.102115	2.41298	0.595965	0.129994	0.108846	0.0602372	0	0.0368734	0	0.0571975	0.276058	0	0	0.636109	0.0510264
KRT16P5	0	0	0	0	0	0	0	0	0	0	0	0	0	0	0	0	0	0	0	0	0	0	0	0	0	0	0	0	0	0	0	0	0	0	0	0	0	0	0	0	0	0	0	0	0	0	0	0	0
ENSG00000266599	0	0	0	0	0	0	0	0	0	0	0	0	0	0	0	0	0	0	0	0	0	0	0	0	0	0	0	0	0	0	0	0	0	0	0	0	0	0	0	0	0	0	0	0	0	0	0	0	0
DSCR4	1.42188	1.17893	0	0	5.07826	0	0	0	0	0	0	3.08442	0	0	0	0	5.6303	0	0	0	0	0	0	0.48684	0	0.0160411	0	0.0272877	0	0.355813	0	0	0	0	0.0240125	0	0	0	0	0	0.025139	0	0	0	0	4.80443	0.684405	0	0
ENSG00000231563	1.17272	0.728221	0.314827	0	1.31635	1.71795	0.223964	0.223157	0	0.141936	0	0.182004	0.819977	0.193271	0.624139	0	0	0.653981	0	0	0	0	0	0	0.512786	0	0.262111	0.198053	0.202242	0.368925	0.460859	0	0.14676	0.454711	2.96279	0.164731	0.184935	0	0.371538	0.205615	0	0.251729	1.07742	0.585719	0	0.250866	0.730497	0.197392	0.34835
FAM231D	0	0	0	0	0	0	0	0	0	0	0	0	0	0	0	0	0	0	0	0	0	0	0	0	0.0106893	0	0	0	0.0168635	0	0	0	0	0	0.014532	0	0	0	0	0	0	0	0	0	0	0	0	0	0
NXF2B	0	0	0	0	0	0	0	0	0	0	0	0	0	0	0	0	0	0	0	0	0	0	0	0	0	0	0	0	0	0	0	0	0	0	0	0	0	0	0	0	0	0	0	0	0	0	0.0106893	0	0
AC008746.10	0.140627	0	0.0943814	0	0	0	0	0	0	0	0	0	0	0	0	0	0	0	0	0	0.192569	0	0	0	0	0	0	0	0	0	0	0	0.0879938	0	0	0	0	0	0	0	0	0	0	0	0	0	0	0	0
GJB7	0	0	0.0483692	0	0	0	0	0.0228568	0	0	0	0	0	0	0.0213091	0	0	0	0.0184337	0	0	0	0	0.025851	0.026261	0	0.0268467	0	0	0.0188935	0	0.0257239	0.0150319	0	0.0178508	0.0168725	0	0.0227243	0	0	0	0.0515667	0	0.0199974	0	0	0.224463	0	0
S100A7	0	0	0	0	0	0	0	0	0.651901	0	0	0	0	0	0	0	0	0	0	0	0	0	0	0	0	0	0	0	0.427124	0	0.121663	0	0	0	0	0	0.292929	0	0	0.108562	0	0	0	0	0	0	0	0	0
ENSG00000271947	0.114837	0	0.154145	0	0	0.152935	0	0.109262	0.151133	0	0.0942951	0.0891129	0	0	0	0	0	0.0800504	0	0	0	0	0	0.0617875	0	0	0.256669	0	0	0.0903163	0.225646	0	0.0718565	0	0.255995	0	0	0	0	0	0.0893349	0.123251	0	0.0955931	0	0	0.357665	0	0
HCST	5.08919	2.85764	7.33989	4.98816	2.06621	7.28224	1.65434	3.19373	5.84265	3.27635	6.93508	3.10892	6.94015	7.8519	2.20909	9.46513	8.42729	7.39703	3.1573	9.30075	20.9067	5.49664	7.38638	2.91298	6.80612	6.6112	3.3882	3.65735	16.1527	11.752	8.51049	3.2465	10.0276	2.23919	5.39079	2.35756	4.6104	3.27764	4.71695	26.9587	2.02162	4.12561	8.05801	3.6054	4.08927	13.6663	6.94723	7.10804	17.2882
ENSG00000228203	0.0428416	0.0221694	0.0479217	0.0438575	0.0961772	0.218709	0.0136364	0.230983	0.0187941	0.034568	0.0234521	0.132979	0.0499254	0.0235351	0.202675	0.0520127	0.0126299	0.0895917	0.0219158	0.0322796	0.0391103	0.0503419	0.0927762	0.0153671	0.179525	0.0425325	0.0877744	0	0.0123138	0.0224625	0.0841802	0.0152916	0.00893569	0.0184572	0.880745	0.0200597	0.20268	0	0.0339324	0.0250384	0.0444368	0.0229903	0.0262402	0.0832121	0.0573736	0.0916459	0.0266864	0.0120185	0
RP4-738P11.3	0.429618	2.91789	0	0	0.120559	0	0	0	0	0	0.0881919	0.416725	0.125164	0	0	0.0977974	0	0.0748692	0	0	0.147075	0	0	0	0	0	0.060014	0	0	0.337882	0	0	0	0.0694085	0.239426	0	0	0.40639	0	0	0	0	0.789414	0	0	0	3.81348	0.361566	0
RP11-555K2.1	0	0	0	0	7.87454	0	0	0	0	0	0	0	0	0	0	0	0	0	0	0	0	0	0	0	0	0	0	0.455682	0	0	0	0	0	0	0	0	0	2.04186	0	0	0	0	0	0	0	0	3.36147	0	0
RP11-95P9.1	0.630152	0	0	0	0	0	0	0	1.65864	0	0	0	0	0.173088	0	0	0.185771	0	0	0	0	0.444283	0	0	0.114809	0	0	0	0	0	0	0	0.131434	0	0	0	0	0	0	0	0	0	0	0.699403	0	0	0.523369	0	0
ENSG00000250831	0	0	0	0	0	0	0	0	0	0	0	0	0	0	0	0	0	0	0	0	0	0.184972	0	0	0	0	0	0	0	0	0	0	0	0	0	0	0	0	0	0	0	0	0	0	0	0	0	0	0
FHDC1	0.201353	0.0703314	0.101353	0.0618381	0	0.174299	0.0480676	1.18778	0.105997	0.0974804	0.223202	0.0312497	0.0469293	0.0829602	0.812653	0.146674	0.0445197	0.0701792	0.216306	0.00758561	0.165434	0.0851773	0.0245274	0.146254	0.704351	0.029985	0.0562546	0.0680102	0.190985	0.158358	0.0791283	0.118585	0.119692	0.0325303	0.837863	0.141419	0.158764	0.02857	5.13525	0.0617813	0.0313275	0.0324159	0.0739963	0.00838053	0.355941	0.161524	0.495426	0.101675	0.119621
ENSG00000271417	0.609327	0	0	0	0	0	0.0387894	0.0386496	0.0534607	0	0	0	0	0.0334735	0.0360325	0	0	0	0	0	0	0	0.0329884	0.0218563	0	0.0604929	0	0	0.0350273	0	0	0	0	0.0262512	0.0301846	0	0	0	0	0.0356115	0	0	0.671775	0.101443	0	0	0	0.0341872	0
LCP2	2.40984	0.88904	1.62966	1.82913	0.925659	1.23247	0.691216	1.47335	1.27824	0.593315	2.54305	0.839019	1.34542	1.13257	1.7312	0.600717	1.53972	2.1014	1.65931	3.30007	3.35012	1.66674	1.01198	0.443703	3.28039	2.15593	1.84317	1.40045	2.93916	1.12419	3.06073	1.16758	1.8003	0.994791	4.18731	1.47373	2.99107	0.433374	4.19477	4.14489	0.819725	1.30796	2.18876	1.93736	1.85537	1.8719	2.26022	0.840551	4.47053
OLFM3	0	0	0	0	0.315771	0	0.0141383	1.05655	0	0	0	0	0.0172543	0	0.0131334	0	0.144042	0	0	0.0446236	0	0.0208779	0	0.0477981	0	1.54343	0	0.225046	0	0.0465785	0.0145464	0	0	0	0	0	0	0	0	0	0	0	0	0.0246499	0	0	0.617932	0	0
PRDM8	0.0723365	0.0224593	0.0679678	0.088862	0.0162392	0.00963342	0.0138147	0.0412947	0.0190398	0.00875501	0.0475175	0.022453	0.101157	0.0119215	0.17966	0.0658662	0.0383852	0.0806786	0.0555059	0.0981054	0.118865	0.0816004	0	0.0311362	0.0869824	0.0502701	0.0646708	0	0.137223	0.0341344	0.0568541	0.0154916	0.153893	0.0373971	0.0860012	0.020322	0.136887	0	0.0572935	0.228292	0	0.046582	0.0664584	0.168601	0.0348743	0.108318	0.108142	0.036527	0.128923
ENSG00000253358	0	0	0	0	0	0	0	0	0	0	0	0	0	0	0	0	0	0	0	0	0	0	0	0	0	0	0	0	0	0	0	0	0	0	0	0	0	0	0	0	0	0	0	0	0	0	0	0	0
ENSG00000225490	0	0.37267	0.080557	0	0.134729	0.239773	0.229229	0.114202	0.157965	0	0.098558	0.465708	0.279751	0.296721	0	0	0.21231	0.0836694	0.184203	0	0.164362	0.0846254	0.487369	0.0645808	0.13121	0.297907	0.402409	0	0.206997	0.0943993	0.35377	0.128527	0.075105	0	0.891894	0.252905	0.189282	0.113539	0.0950679	0.841796	0.0933735	0	0.110275	0.0999147	0.482229	0.385145	0.598136	0.303048	0.0891347
ENSG00000231098	0	0	0	0	0	0	0	0	0	0	0	0	0	0	0.142215	0	0	0	0	0	0	0	0	0	0	0	0	0	0	0	0	0	0	0	0	0.225211	0	0	0	0.140553	0.249447	0	0	0	0	0.171486	0	0	0
PRKCQ	0.322311	0.140727	0.189278	0.185599	0.0678348	0.0536548	0.0769431	0.0766658	0.0795339	0.060953	0.463148	0.187583	0.117377	0.265593	0.303767	0.165083	0.320688	0.280845	0.262776	0.424988	0.772379	0.21304	0.310821	0.0433544	0.165157	0.289987	0.225121	0.221134	0.746916	0.221803	0.257284	0.172565	0.340332	0.0390541	0.628683	0.240522	0.651229	0.209608	1.32429	0.688733	0.0783544	0.227015	2.12836	0.553367	0.113305	0.560204	0.3388	0.0847677	0.822772
ENSG00000224081	0.535063	0.262308	0.151202	0.25946	0	0.0750074	0.268909	1.66123	0.444742	0.119294	0.115619	0.131117	0.229723	0.0696169	0.0749391	0.589772	0.0249061	0.37298	0.367352	0.127311	0.0771255	0.178693	0.160085	0.0303039	0.107746	0.223664	0.125884	0.0237798	0.364242	0.066444	0	0.211085	0.405287	0.272981	1.69498	0.494472	0.42189	0.213109	4.50558	0.0493756	0.0438146	0.0151123	0.413965	0.375072	0.543075	0.210846	0.578881	1.01912	0.0418256
ENSG00000273396	0	0	0	0	0	0	0	0	0	0	0	0	0	0	0	0	0	0	0	0	0	0	0	0	0	0	0	0	0	0	0	0	0	0	0	0	0	0	0	0	0	0	0	0	0	0	0	0	0
SLFN11	0.898772	0.706248	1.16173	2.31725	1.4074	0.975285	1.33502	18.7602	0.773956	0.5439	0.91111	1.326	0.568949	0.475455	1.39762	0.32331	0.902832	1.30717	1.33674	1.26242	1.03321	1.60374	0.558673	0.376117	2.25004	1.02448	2.51102	0.92759	1.129	0.488692	1.84232	1.7347	0.999793	1.24051	3.85867	2.26781	3.19339	0.230913	1.63465	2.02329	1.77816	0.607356	0.723794	1.47784	1.9704	0.8189	1.73485	0.317503	2.34015
ENSG00000251031	0	0	0	0	0	0	0	0	0	0	0	0	0	0	0	0	0	0	0	0	0	0	0	0	0	0	0	0	0	0	0.132275	0	0	0	0	0	0	0	0	0	0.104737	0	0	0	0	0	0	0	0
CGB	0	0	0.0507959	0	0	0.050397	0	0	0	0	0	0	0	0	0	0	0	0.0527584	0	0	0	0	0	0	0	0	0	0	0	0	0	0	0	0	0	0	0	0	0	0	0	0	0	0	0.0608147	0	0	0	0
FAM60BP	0	0.0783004	0	0	0	0	0	0.287934	0	0	0.0828307	0	0	0	0	0	0	0	0.0774046	0	0	0	0	0.0542753	0	0	0	0	0	0	0.0991058	0	0	0	0	0	0	0.0954213	0	0	0	0	0	0	0	0	0	0	0
CYBA	70.8446	5.95484	8.55927	213.747	3.10716	6.60931	2.71879	129.524	8.45705	3.55374	6.39679	6.04524	5.89869	13.458	4.24435	5.74321	10.3873	12.06	7.40391	17.49	18.303	7.31869	4.75284	106.874	49.3238	7.45929	6.56261	5.27598	13.9123	12.9224	11.0337	5.29306	6.99023	3.56495	89.5049	3.24957	91.3435	3.40402	294.826	20.4017	346.298	7.68205	18.7652	6.27087	3.55881	12.3718	6.84791	10.0342	17.3262
MBOAT4	0.395095	0.170376	0.176778	3.03347	0.147828	0.0584631	0.209596	4.88687	0.115549	0	0.0360467	0.0340656	0.0511582	0.217046	0	0.119918	0.0776504	0.0918039	11.992	0.264613	0	0.247608	0.178251	0.0236198	0.503883	0.130748	0.245295	0.0741388	0.0378536	0.379782	0	0.0940149	0.0824069	0.085108	0.456683	0.0924976	1.86916	0.0830519	12.5173	0.0384849	0.751311	0.0942319	0.362989	0	0.458564	0.140863	0.519561	0.110837	0.0326002
ENSG00000233221	0	0	0.0130563	0.0597448	0	0.10363	0	0.0185092	0	0	0	0	0	0	0	0.0708544	0	0.0406821	0	0	0	0	0	0	0.0425318	0	0	0	0	0	0	0	0	0.0251433	0.0289107	0	0.015339	0.0368038	0.0154081	0	0	0	0	0.0161937	0	0	0.0121179	0	0.0866791
POTEM	0	0	0	0	0	0	0	0.0251708	0	0	0	0	0	0	0	0	0	0.0184413	0	0	0	0	0	0	0.0433793	0	0	0	0	0	0	0	0.0165536	0	0	0	0	0.0250248	0.0209536	0	0.0205801	0	0.0243054	0	0	0	0	0	0.0392918
EMP3	6.17173	7.91214	10.823	6.23655	1.96655	6.68142	3.99226	2.34884	4.92582	4.04813	6.63709	6.39592	4.17613	8.62925	3.53192	3.87939	9.47289	8.13249	4.7052	13.1705	11.2321	7.7201	6.69341	2.76365	6.63784	5.45518	7.25309	5.17789	14.6262	6.07519	6.84585	8.35678	7.92293	2.52169	13.6692	3.80333	5.40005	3.3145	11.0065	16.5806	2.04436	3.93162	7.75539	3.44709	5.56701	10.7323	8.40812	4.55742	16.2629
CD180	0.456716	0.172708	0.337961	0.413597	0.276043	0.241733	0.167736	0.323121	0.431534	0.212604	0.605798	0.17266	0.313881	0.289497	0.519382	0.159947	0.0932134	0.546936	0.24262	0.970591	0.400902	0.264208	0.266281	0.113415	0.620875	0.215084	0.189762	0.286771	0.302936	0.405244	0.552251	0.112858	0.315089	0.204331	0.539511	0.361896	0.277011	0.17724	0.983185	0.523579	0.12754	0.509032	0.763892	0.292446	0.225834	0.338191	0.357438	0.571629	0.782681
AC112198.1	0.0474385	0	0	0.043707	0	0	0	0.0270812	0	0.0172247	0	0	0	0	0.00841583	0.00863905	0	0.00661366	0.0509614	0.0142973	0.0129921	0.00668923	0	0	0.0570434	0	0.00530141	0	0	0	0.0186425	0.0203188	0	0.0367877	0.0634499	0.0199909	0.0224428	0	0	0	0	0	0.00871673	0.00789777	0.00762357	0	0.0413698	0	0.0281827
RP11-443K8.1	0	0	0	0	0.253419	0	0	0	0	0	0	0	0	0	0	0	0	0	0	0	0	0	0	0	0	0	0.252304	0	0	0	0	0	0.282538	0	0	0	0.178016	0	0	0	0	0	0	0	0	0	0	0	0
ENSG00000231689	0	0	0	0.800665	0	0	0	0	0	0	0	0	0	0	0	0.0474774	0	0	0	0	0	0	0	0	0	0	0	0	0	0	0	0	0	0	0	0	0	0.0493223	0	0	0.121686	0	0	0.0434036	0	0	0.0324793	0	0
HCAR1	0.0556846	0.0540286	0.074745	0.0641305	0.0468783	0.0556185	0	0.0794716	0.0732842	0.0084245	0.0114309	0.0432108	0	0.057357	0.0123484	0.0633796	0.024624	0.0388164	0	0.0104891	0	0.0687049	0.0678309	0.00749018	0.0456538	0.0345517	0.0777867	0.0117552	0.0600195	0.0218972	0.0957385	0.104347	0.0522648	0.026989	0.031033	0.107552	0.13172	0.0131685	0.0551306	0.0488164	0.0108296	0.0373528	0.613915	0.0115883	0.0559296	0.0297798	0.0260148	0.011716	0.010338
MRC2	0.503142	2.3733	1.31826	3.87789	0.814562	1.75246	0.85002	44.2903	0.280147	0.222505	0.754773	1.11874	0.653989	2.71086	1.01276	0.299551	2.64423	1.00497	1.61112	1.17375	1.9477	1.33026	0.502885	0.2603	5.93377	0.83572	2.84383	1.22556	4.94754	0.456584	1.15974	0.455876	1.41067	0.181332	14.5233	1.66496	0.968913	0.237969	11.2655	1.56924	35.4148	1.45386	0.933401	0.781272	0.241016	1.26259	0.928178	0.667737	4.14595
KRT38	0	0	0	0	0	0	0	0	0	0	0	0	0	0	0	0	0	0	0	0	0	0	0	0	0	0	0	0	0	0	0	0	0	0	0	0	0	0	0	0	0	0	0	0	0	0	0	0	0.0210918
ENSG00000260135	0.0438125	0.0340077	0.0294046	0	0	0.0291737	0	0	0	0.106054	0.359753	0.0679964	0.663739	0	0.0388628	0	0	0	0.0336186	0	0.95992	0	0.498113	0	0.0957877	0.0652445	0.048962	0.073992	0.188893	0.103372	0.043044	0	0.383804	0	0.130222	0	0	0	0.0347014	0.153635	0	0.0470227	0.644037	0.072941	0.0704086	0.0468614	0.191038	0.848069	0.0325356
HLA-DRB1	232.367	49.8227	95.6553	129.204	73.0197	83.1427	72.0337	61.6037	383.584	79.7507	171.407	82.0798	38.7942	126.714	110.801	52.7449	228.287	172.906	94.7168	204.65	165.753	151.124	67.5027	32.8375	379.656	104.278	145.141	99.8049	172.011	317.821	283	85.4102	883.247	64.4075	128.562	71.8229	72.0029	54.3129	340.23	611.477	51.9523	73.8343	209.089	139.53	73.9893	867.838	116.968	143.81	190.097
ENSG00000235531	0	0.254165	0.198495	0.389273	0.106707	0.196936	0.16138	0.432145	0.750662	0.0830974	0.433662	0.180325	0.0123092	0.0870396	0.196757	0.0480894	0.242886	0.169349	0.194522	10.6168	0.0867846	0.223414	0.0428891	0.0397823	0.508053	0.173027	0.360027	0.115951	0.336996	0.0415363	0.0311322	0.158347	0.09914	0.0887377	0.800575	0.229978	0.374785	0.0599496	0.401573	0.175938	0.106821	0.090693	0.0582262	0.0879262	0.280082	0.124275	0.105273	0.0533373	0.447106
L1CAM	0.0268258	1.31875	0.0540122	0.0411928	0.190705	0.0178626	0	0.0680624	0.0235362	0.00541129	0.00734239	0.00693887	0.0104205	0.0221052	0.00793172	0.0081421	0	0.0436325	0.0137228	0.094324	0.0244894	0.0189133	0.0580929	0.0914119	0.00977491	0.0177548	0.0299787	0.0151014	0.0848149	0.0351629	0	0.028725	0.0727374	0	0.0730889	0	0.0070506	0.00845847	0.0779063	0.0470342	0.0139123	0	0.00821531	0.0148869	0.00718503	0.0095642	0.03342	0.0451531	0.0597634
SYTL3	0.275039	0.142325	0.369183	0.77429	0.102908	0.274712	0.175088	0.392528	0.120656	0.221923	0.583419	0.160071	0.213677	0.245526	0.447271	0.125218	0.304059	0.351492	0.457265	0.431733	1.56928	0.30703	0.223355	0.0739914	0.463517	0.341317	0.65315	0.212893	0.53361	0.396568	0.833159	0.19634	1.00391	0.473972	0.953735	0.901468	0.253008	0.260168	1.30705	0.602788	0.784518	0.393587	0.357976	0.782239	0.313082	0.441267	0.442586	0.192893	1.29356
PCBP3-OT1	0	0	0	0.0212034	0	0.0919454	0	0.0262756	0	0	0	0	0	0	0.0122482	0.0125731	0	0	0.0105954	0	0	0	0	0	0	0	0.00771556	0	0	0	0	0	0.00864012	0	0.0410416	0	0.0217752	0	0.0109367	0	0	0	0	0	0	0	0	0	0.0102541
ENSG00000220891	0	0	0	0	0	0	0	0.203	0	0	0	0	0	0	0	0.0388549	0	0.0148728	0	0	0	0	0	0	0	0	0	0	0.036795	0	0	0	0	0	0.015854	0	0.0168231	0	0	0	0	0	0.0196021	0	0	0	0	0	0
CCDC140	0	0	0	0	0	0	0	0	0	0	0	0	0	0	0	0	0	0	0	0	0	0	0.0279001	0	0	0	0	0	0	0	0	0	0	0	0	0	0	0	0	0	0	0	0	0	0	0	0	0	0
KRT14	0	0	0	0	0	0	0	0	0	0	0	0	0	0.0479576	0.077436	0.582926	0.025736	0	0	0	0	0.0205164	0	0.0469704	0.159051	0	2.55279	0	0.12546	0	1.51522	0.0623194	0.455207	0	0	0	0.0229446	0	0.11524	0.0255104	0	0	0	0	0	0	0.199389	0	0
RP11-259P6.3	0	0	0	0	0	0	0.168793	0	0	0	0	0	0	0	0	0	0	0	0	0	0	0	0	0	0	0	0	0	0	0	0	0	0	0	0	0	0	0	0.0700034	0	0	0	0	0	0	0	0	0	0
RPL7AP28	0.116245	0	0.234053	0	0.521928	0.0774048	0	0.221203	0.764928	0	0	3.96904	0	0	0.103112	0.211695	0	0	0.0891983	0	0	0	0	0.062545	0.508295	0.115406	0	0	0	0	0	0	0	0	0.0863778	0	0	0.21992	0.092071	0	0	0.124762	0	0	0.373622	0	0	0	0
RP11-346C16.1	0	0.151981	0	0	0	0	0	0	0	0	0	0	0	0	0	0	0	0	0	0	0	0	0	0	0	0	0	0	0	0	0	0	0	0	0	0	0	0	0.155081	0	0	0	0	0	0	0	0	0	0
SIRPB3P	0	0	0	0	0	0	0	0	0	0	0.0448212	0	0	0	0	0	0	0	0	0.0411282	0	0	0	0	0	0	0.0305006	0	0	0	0	0	0	0	0	0	0	0	0	0	0	0	0	0	0.0438606	0.0583841	0	0	0
STEAP1B	0.0573195	0.0444919	0.0384698	0.0440089	0.0321698	0.0190838	0.136835	0.16361	0.414897	0.0173437	0.0941323	0.0444795	0	0.0708493	0.0508438	0.156577	0.101388	0.019978	0.0879659	0	0.0392454	0.121238	0	0.0462606	0.266301	0.0711323	0.0640564	0.0242008	0.123564	0.0676202	0.056314	0.0306888	0.0179331	0.0370418	0.234257	0.040258	0.112989	0.0271102	0.113499	0.0502497	0.0222951	0.0153798	0	0.047714	0.0460574	0.153271	1.99947	0.07236	0.021283
ENSG00000253859	0	0	0	0	0	0	0	0	0	0	0	0	0	0	0	0.110694	0	0	0	0	0	0	0.0987234	0	0	0	0	0	0	0	0	0	0	0	0	0	0	0	0	0	0	0	0	0	0	0	0.0757255	0	0
SPATA31C2	0	0	0	0	0.0394521	0	0.016781	0.0167205	0	0	0.0144301	0	0	0	0	0	0	0	0.0134848	0	0	0	0	0	0	0	0	0	0	0.0276425	0	0	0	0	0.0130584	0	0	0	0	0	0	0	0	0.0146288	0	0	0.0109468	0	0
ENSG00000264490	0	0	0	0	0	0.0230439	0	0	0	0	0	0	0	0	0	0	0	0	0	0.0521501	0	0	0	0	0	0	0	0	0	0	0	0	0	0	0	0	0	0	0	0	0	0	0	0	0	0	0	0	0
AP000705.6	0	0.147205	0.38184	0	0	0	0	0	0	0	0	0	0	0	0	0	0.167725	0	0	0	0	0	0	0.102038	0	0	0	0	0	0.149151	0	0	0	0	0	0	0	0	0	0	0	0	0	0	0	0	0	0	0
C1orf147	0	0.0983237	0	0	0	0	0	0.120522	0	0.0191641	0	0	0	0	0	0.0288353	0.056015	0.04415	0.121499	0	0	0	0.0257171	0	0.0346179	0.0314394	0	0	0	0	0	0	0.0198154	0.0613947	0.0470627	0.0222418	0.0749092	0	0.100329	0	0	0	0.0581891	0	0	0	0.493155	0	0.0235169
GHc-602D8.2	0	0	0	0	0	0	0	0	0	0	0	0	0	0	0	0	0	0	0	0	0	0	0	0	0	0	0	0	0	0	0	0	0	0	0	0	0	0	0	0	0	0	0	0	0	0	0	0	0
TESC	2.03332	1.17703	1.75787	82.0796	0.502891	7.25162	2.79723	172.574	0.997822	3.19092	0.594265	2.32665	0.481939	2.89665	1.74247	50.5539	4.05379	1.89785	15.8667	1.0906	1.17981	0.874726	1.90312	0.945676	8.19399	1.74494	1.79089	0.552923	75.3322	1.2468	1.69293	2.76773	2.76025	0.935393	72.5229	6.89842	33.2878	4.04238	506.864	58.3402	233.701	0.462353	2.81797	1.09014	10.4952	1.87993	1.63152	1.16016	22.1633
CD300LD	0	0.0395408	0	0	0	0.0339203	0	0	0	0	0	0	0	0	0	0	0	0	0	0	0	0	0	0	0.0278431	0.0252866	0	0	0	0	0	0	0	0.0658395	0	0	0.0401662	0	0	0	0	0	0	0	0	0	0	0	0
EGFL6	0	0.0395256	0.0683514	0.234579	0.0285789	0.0169536	0.0243122	1.4777	0.0670156	0.0924465	0.104531	0.0197573	0.0296706	0.104902	0	0	0.157624	0.195229	0.0781469	0.191837	0.522971	0.0538525	0.0413525	0	0.904554	0.1643	0.227625	0.0214994	0.548855	0.10012	0.0500281	0.0545265	0.23897	0.131629	0.416217	0	0.0200754	0.0240841	0.282323	0.178563	0.316904	0	0.421051	0	0	0.245092	0.539228	0	0.170166
ENSG00000224730	0	0	0	0	0	0	0	0	0	0	0	0	0	0	0	0	0	0	0	0	0	0	0	0	0	0	0	0	0	0	0	0	0	0	0	0	0	0	0	0	0	0	0	0	0	0	0	0	0
S100A4	23.4421	10.807	13.6469	9.2478	2.03527	11.9443	5.56524	5.60679	17.3857	3.60532	33.0738	9.54769	11.9234	16.969	11.718	16.8639	20.7324	14.3096	16.0499	41.3269	32.4552	7.03109	30.5012	6.44579	11.751	12.0222	11.398	7.60078	60.3616	22.3581	6.10762	5.26997	18.6392	3.6408	39.5536	9.32376	19.0454	6.86065	30.9793	41.1582	1.81354	5.35164	33.1981	7.87016	5.61963	21.9565	25.6951	19.6198	26.3048
RP4-576H24.4	0	0	0	0.0794425	0	0	0	0	0	0	0	0	0	0	0	0	0	0	0	0	0	0	0	0	0	0	0	0	0	0	0.0508274	0	0	0	0	0	0	0	0	0	0	0	0	0	0	0	0	0	0
SPTSSB	0.0886195	0.0275149	0.0594767	0.136081	0.278524	0.30685	0.0169244	0.944351	0.0933028	0.0429031	0.116427	0.0137536	0	0.0876299	0.110051	0.371186	0.125402	0.123549	0.0272001	0.253732	0.072811	0.0624804	0	0.00953623	0.0774998	0.017596	0.0396141	0.0299327	0.0611318	0.0139393	0.017413	0.0379574	0.0221805	0	0.474121	0.112034	3.64749	0.0335312	0.224609	0	0	0.0475563	0.863033	0	0.028483	0.20853	0.0662421	0.0298328	6.97583
ENSG00000272002	0.104694	0	0.14053	0	0	0.139426	0	0	0	0	0	0.0812417	0	0	0.185732	0	0.0925926	0	0	0	0	0	0.595143	0	0.114447	0.0519692	0.175498	0.0884053	0	0	0.102857	0	0	0	0.70015	0.0735312	0.1651	0	0	0.183562	0	0	0	0	0	0.223959	0	0.0881103	0
MAS1LP1	0	0	0	0	0	0.0422141	0	0	0	0	0	0	0	0	0.0562341	0	0	0	0	0	0	0	0	0	0	0	0	0	0	0	0	0	0	0	0	0.0445261	0	0	0	0	0	0	0	0	0	0	0	0	0
ENSG00000239203	0	0	0	0	0	0	0	0	0	0	0	0	0	0	0	0	0	0.0970003	0	0	0	0	0	0.149741	0	0.0690744	0	0	0	0	0	0	0	0	0	0.0977333	0.219441	0	0	0	0	0	0	0.115834	0	0	0	0	0
ENSG00000234184	0	0	0	0	0	0	0	0	0	0	0.0768725	0	0	0.0771448	0	0	0	0.130519	0	0	0.128198	0	0	0	0	0	0.104623	0	0	0.0736288	0	0	0.468638	0	0.13913	0	0.147635	0.177115	0	0	0	0	0	0	0	0	0.291581	0	0.417136
ENSG00000258784	0	0	0	0	0	0	0	0	0	0	0	0	0	0	0	0	0	0	0	0	0	0	0	0	0	0	0	0	0	0	0	0	0	0	0	0	0	0	0	0	0	0	0	0	0	0	0	0	0
LHX8	0	0	0	0	0.018734	0	0	0	0	0	0	0	0	0	0	0	0	0	0	0	0.0228545	0	0	0	0	0	0.0186516	0	0	0	0	0	0	0	0	0	0	0.0157876	0	0	0	0.00895642	0	0	0	0.0357028	0.0831705	0	0
RP11-292B8.2	0	0	0	0	0	0	0	0	0	0	0	0	0	0	0	0	0	0	0	0	0	0	0	0	0	0	0	0	0	0	0	0	0	0	0	0	0	0	0	0	0	0	0	0	0	0	0	0	0
ENSG00000260757	0.0375642	0.37905	0.529433	0	0.126495	0	0	0.0357405	0.0494368	0	0.0925341	0.0291495	0.0437754	0.216678	0	0	0.0332223	0.0785555	0	0.0849099	0	0.079453	0	0.0606336	0.082127	0	0.398803	0.0317198	0.0323908	0.0886296	0.0738105	0	0	0.0728259	0.0279127	0	0	0	0.0297524	0.032931	0.0292222	0.0201583	0	0	0	0.0401783	0.795568	0.031614	0.0278956
TPD52L3	0	0	0	0	0.0215022	0	0	0	0	0	0	0	0	0	0	0	0	0	0	0	0	0.0135059	0	0	0	0	0	0	0	0	0	0	0	0	0.0142343	0	0.0151044	0	0	0	0	0	0	0	0.0153923	0	0	0	0
UBASH3A	0.450953	0.166683	0.259419	0.296772	0.144624	0.171588	0.0205053	0.0817256	0.113044	0.0779709	0.387919	0.116645	0.125123	0.230037	0.304767	0.234638	0.398828	0.44907	0.362507	0.663374	1.14681	0.0908402	0.052316	0.0115539	0.152583	0.437039	0.323971	0.145064	0.685112	0.337773	0.274264	0	0.362793	0.0277544	0.478697	0.28656	0.507958	0.0406258	0.204099	0.602411	0.0501154	0.12676	0.789158	0.268131	0.155293	0.321556	0.508299	0.162652	0.558137
IL9RP4	0	0	0	0	0	0	0	0	0	0	0	0	0	0	0	0	0	0	0	0	0	0	0	0	0	0	0	0	0	0	0	0	0	0	0	0	0	0	0	0	0	0	0	0	0	0	0	0	0
PRL	0	0	0	0	0	0	0	0	0	0	0.0399579	0	0	0	0	0.04431	0	0	0	0	0	0	0	0	0	0	0	0	0	0	0	0.052108	0	0	0	0	0	0	0	0	0	0	0	0	0	0	0.0606248	0	0
IL21R	0.133553	0.0282723	0.0733368	0.0559309	0.0136282	0.0565917	0.0231871	0.0808623	0.0479357	0.0220421	0.139571	0.0565289	0.0424462	0.0500235	0.183082	0.0221104	0.0322135	0.0930969	0.093163	0.0823317	0.315887	0.0684804	0.0492985	0.0065325	0.0398166	0.0542411	0.0610569	0.102522	0.125629	0.21962	0.0596411	0.0390023	0.0835676	0.0392303	0.234565	0.0938004	0.201037	0.0344543	0.182711	0.28738	0.0188899	0.0586386	0.111546	0.161706	0.00975571	0.155833	2.04953	0.0919622	0.198356
RP11-272L13.2	0	0	0	0	0	0	0	0	0	0	0	0	0	0	0	0	0	0	0	0	0	0.13072	0	0	0	0	0	0	0	0	0.182155	0	0	0	0	0	0	0	0	0	0	0	0	0	0	0	0	0	0
MORN5	0	0	0	0	0	0.0509195	0.0730206	0	0	0	0	0	0	0	0	0.0696299	0.135262	0	0.117355	0	0	0	0	0	0.0417968	0	0	0	0.0659385	0	0	0	0.0478492	0	0	0.0537083	0	0.0723355	0	0	0	0	0	0	0	0	0	0	0
RP11-365D23.2	0	0	0	0	0	0	0	0	0	0	0	0	0	0	0	0	0	0	0	0	0	0	0	0	0	0	0	0	0	0	0	0	0	0	0	0	0	0	0	0	0	0	0	0	0	0	0	0	0
ENSG00000243319	0	0	0	0	0	0	0	0.0265462	0	0	0.0458197	0	0	0	0	0	0	0	0.0214091	0.0210223	0	0	0	0	0	0.0138497	0	0.0235599	0.0240583	0.0219432	0	0	0	0.0180304	0.0207321	0	0	0	0	0	0.0217047	0	0	0	0	0	0.0173796	0	0
RASGEF1A	0.0765078	0.0424186	0.198056	0.0167833	0	5.7058	0.0417467	0.103991	0.0431524	0.0132284	0.0448729	0.0339254	0.0254738	0.0540382	0.47505	0.0497602	0.763641	1.10473	0.620614	0.0741161	0.209533	0.0154118	0.0177517	0.00588065	0.645183	2.29495	0.806143	0.0369168	0.0471222	0.077363	0.010738	0.0117035	0.0820676	0.515609	0.0487288	0.0153528	0.0344716	0.0103388	8.2499	0.0958161	0	0.023461	0.100415	0.0636868	0.0439111	0.140283	0.0680819	0	6.97207
ENSG00000271392	0	0	0.278425	0	0	0	0	0	0	0	0	0.107307	0	0	0.245321	0	0	0	0	0	0	0	0	0	0	0	0.0772681	0	0	0	0	0	0	0	0	0	0	0	0	0	0	0	0	0	0	0	0	0	0
ENSG00000237339	0	0	0	0	0	0.0160955	0	0	0	0	0	0	0	0	0	0	0	0	0	0	0	0	0	0	0	0	0.0135064	0	0	0	0	0	0	0	0	0	0	0	0	0	0	0	0	0	0	0	0	0	0.0179503
ENSG00000244300	0.116296	0.0902701	2.4196	0.625031	0.358983	1.31646	1.41589	0.995849	0	0.545426	0.907183	0.293296	0.0338814	0.239578	0.464209	0.0264734	0.719976	2.69549	1.85168	0.197156	0.119438	0.225482	0.141664	0.0625724	0.5403	0.245346	0.796034	0.392809	1.65461	0.0685977	0.228512	0.186794	0.327462	0.0751545	1.25303	0.428819	0.527263	0.302523	4.53648	0.50976	0.497583	0.109215	0.74792	0.0968074	0.770932	0.310973	2.39058	0.0244687	0.474995
AKNAD1	0	0.0209651	0.0362548	0.041475	0	0.0089925	0.0128956	0.0128491	0	0	0	0	0	0	0	0.0122968	0.0119438	0	0	0	0.0184929	0	0	0.00726616	0	0.00670366	0	0	0	0	0	0	0.00845027	0.00872725	0.0200699	0	0	0.0127746	0.0106963	0	0	0	0.0124074	0.0112417	0	0	0	0	0
ENSG00000256232	0	0	0.0513226	0.117425	0	0	0	0.218272	0	0.092553	0	0	0	0.0630134	0.271323	0	0.067631	0	0	0	0.20943	0	0.186301	0	0.0417968	0	0.0427289	0	0	0	0	0	0	0	0	0.0537083	0	0	0	0	0	0	0	0	0.0614453	0	0	0	0
ENSG00000248268	0	0	0	0	0.263735	0	0	0.111776	0	0	0.0964648	0	0	0	0	0	0	0	0	0	0	0	0	0	0.128423	0.0583159	0	0	0	0	0	0	0	0	0	0	0	0	0	0	0	0	0	0	0.0943973	0	0.512253	0	0
TBXAS1	0.889106	0.632621	0.78142	0.666387	0.582165	1.01491	0.869214	0.956718	1.37907	0.832697	1.55573	0.673512	0.629072	0.837312	0.995213	0.472253	0.917392	1.43139	1.26701	2.65571	1.65233	0.69402	1.11743	0.506853	1.94964	0.93523	0.715632	0.411139	1.55157	0.674283	1.77821	0.691371	1.29812	0.807135	1.58087	1.68752	0.867964	1.43176	4.85401	2.53319	0.345829	1.01673	1.44895	1.76217	0.978068	3.29446	1.06151	1.79941	2.01222
MUC5B	0.0142759	0.0858786	0.00958125	0.0328825	0.00400609	0.118825	0.15336	46.3141	0	0.00647941	0	0.0276951	0.0249547	0.176457	13.1601	0.448465	0.0157823	0.00746357	0.536763	0.00537821	0	0.0578745	0.173899	0.00960135	76.4041	0.0106297	0.0418788	1.81124	0.156951	0.0168414	0.00350638	0.011465	0.0022332	0.0046128	22.2475	0.00250666	2.5946	0	0.336388	0.0219015	48.7453	0.00191524	0	0.059418	0.00286775	0.00381735	44.8409	0.00600731	0.0238533
SIGLEC7	0.58481	0.100874	0.370688	0.349228	0.802308	0.237973	0.372287	0.463682	0.21379	0.334242	0.746976	0.226904	0.189308	0.267722	0.576379	0.118333	0.287341	1.17768	0.722974	1.64014	0.400407	0.32069	0.0791527	0.209769	1.50943	0.32255	0.490159	0.35665	0.11206	0.204416	1.34062	0.173948	0.162636	0.356929	1.27952	0.228188	0.461115	0.21513	1.26092	1.13929	0.101098	1.13327	0.805932	0.567944	0.339377	0.486505	0.546425	0.273431	1.49588
IGSF5	0.0250475	0.0194421	0	0	0	0.0333571	0	0.0953259	0.0329641	0	0	0.0388734	0	0	0	0	0.0443047	0.0349201	0	0	0	0.0353191	0	0	0	0	0	0	0	0.0196992	0	0	0	0	0.148896	0	0.157997	0	0.0991935	0	0	0	0.0690365	0	0	0	0.0312046	0	0
ENSG00000247774	1.05188	0.616527	0.34578	0.362604	0.289154	0.457419	0.122992	0.428921	0.593289	0.220846	1.5688	0.333165	0.700463	0.831402	0.457002	0.488671	1.17711	1.01756	0.807141	1.37484	2.46926	0.378378	1.44694	0.184803	0.621869	0.639363	0.779678	0.362542	2.94318	1.31689	0.548351	0.137921	1.85368	0.291327	1.21231	0.407085	1.03251	0.385821	1.70028	2.08894	0.100198	0.368638	1.53836	0.786263	0.310485	0.964357	1.24359	0.379399	1.84923
LILRA6	0.162368	0.088222	0.185254	0.124663	0.0911268	0.118928	0.139539	0.0772425	0.320529	0.0687808	0.293311	0.125996	0.340587	0.267591	0.777731	0.0295689	0.10052	0.215047	0.199343	0.648393	0.400211	0.274743	0.0263713	0.104833	0.354986	0.330452	0.244959	0.0822636	0.140006	0.204316	0.669982	0.139091	0.213355	0.209855	0.398145	0.14825	0.230445	0.13823	0.218624	0.498195	0.227358	0.235257	0.313265	0.594698	0.234839	0.138934	0.232623	0.0683243	0.265267
RUNX2	0.218769	0.0817604	0.125074	0.0870939	0.0181898	0.0917198	0.0309482	3.99335	0.0426537	0.00980664	0.505639	0.0440125	0.0566537	0.0600904	0.107807	0.0885334	0.0358299	0.0677771	0.236258	0.134309	0.0998574	0.10854	0.151339	0.00435952	0.115145	0.140771	0.258063	0.0273676	0.558932	0.00637241	0.151248	0.0607332	0.121679	0.036653	0.325119	0.364209	0.178885	0.00766446	0.487734	0.085238	0.0189095	0.0478291	0.327541	0.074192	0.058595	0.207993	0.479478	0.0204572	0.397124
ELOVL3	0.0968286	0.93949	0.129972	0	0.815156	0.483568	0	0	0.0637161	0	0.0795078	0	0.338517	0	0.128834	0.220419	0.599454	0.168742	0	0.0729569	0	0	0	0.104196	0.0793864	0.168227	0.0811569	0.0408818	0	1.67536	0.19026	0.103684	0.060588	0.219009	0.179875	1.36014	0.267218	0.27478	0	0.0848857	0.489615	0	0	0	0	0.0517834	4.64428	0.611181	0.0719059
C1orf61	0.0215611	0.00418399	0.0144707	0.0165543	0.0181514	0.0502496	0.0154414	0.0102572	0	0.0195719	0.0708171	0.0125485	0.00628156	0.0133252	0.0669385	0.0147244	0.0429051	0.19163	0.00827225	0.0203069	0.0295249	0.0266026	0.0437737	0.110208	0.014731	0.0267569	0.0271072	0.00455164	0.0883107	0.296751	0.0105915	0.0115438	0.00337283	0.296088	0.012016	0.0605734	0	0.0101977	0	0.0236272	0.016773	0.0115705	0.00495227	0.022435	0.0779617	0.196023	0.010073	0	0.132095
ENSG00000233379	0.0735876	0	0.0987761	0	0.1652	0.0490002	0	0	0.193691	0	0.0604242	0	0	0	0	0	0.130163	0	0	0.332674	0	0	0	0	0	0	0	0	0	0	0	0	0	0	0	0	0	0	0	0	0	0	0	0	0.0591291	0.787085	3.07116	0	0.0546469
AFP	823.865	2.4504	14.6397	0.0625497	1.02876	2.49538	2.31434	2159.37	6.32578	15.7517	6.1376	4.1092	13.1727	4.34679	2.78217	7.75189	0.522371	3.94686	7.4859	7.04372	12.4109	3.43194	3.72144	2.06016	56.8406	39.7828	8.13698	0.85991	19.6695	3.04343	2.56124	4.18731	1.89887	2.4481	251.86	8.52556	214.646	0.327519	2.45199	6.62417	1.64777	3.59585	3042.92	0.508617	3.94403	4.42221	20.413	7.16486	2.07209
HLA-DMA	13.9353	14.9035	27.5305	11.8255	9.61453	25.6398	6.52828	5.58262	393.958	20.4486	43.6193	8.65907	48.6574	14.8503	17.7747	6.79757	108.674	23.9562	20.0995	34.6176	41.8593	27.665	9.01928	5.80656	25.7708	16.1752	47.2171	8.44937	25.0034	36.0517	31.9882	12.1451	190.341	10.1227	17.3424	13.5956	26.8292	8.79616	42.4481	61.0136	5.29804	6.199	18.1455	10.3354	17.0275	67.633	17.6708	21.56	35.6167
ENSG00000272202	0	0.0444535	0	0	0	0	0	0	0	0	0.0470255	0	0	0	0	0	0	0	0	0	0	0	0	0	0	0	0	0	0	0	0	0	0.0358353	0	0	0	0	0.162521	0	0	0	0	0	0	0	0	0	0	0
AVPR1B	0	0.0226668	0	0	0	0	0	0.0555684	0	0	0	0	0	0	0	0	0	0	0	0	0	0	0	0	0	0.0434868	0.0163171	0.0246586	0	0	0	0	0	0	0.108495	0.0205098	0	0.0276231	0.0231292	0	0	0	0	0	0	0	0	0	0
OR1C1	0	0	0	0	0	0	0	0	0	0	0	0	0	0	0	0	0.0621203	0	0	0	0	0	0	0	0	0	0	0	0	0	0	0	0	0	0	0	0	0	0	0	0	0	0	0	0	0	0.087505	0	0
ENSG00000227718	0	0	0.0535433	0	0	0	0	0	0	0	0	0	0	0	0	0	0	0	0	0	0	0	0	0	0	0	0	0	0	0	0	0	0	0	0	0	0	0	0	0	0	0	0	0	0	0	0	0	0
ENSG00000265533	0	0.0172256	0	0	0	0	0	0	0	0	0.0182222	0	0	0	0	0	0	0	0	0	0	0	0	0	0	0	0	0	0	0	0	0	0	0	0	0	0	0	0.0351538	0	0	0	0	0	0	0	0.027647	0	0.0329599
CLEC12A	0.490161	0.0951169	0.315263	0.0940844	0.0229247	0.095196	0.0390042	0.291477	0.403176	0.0247188	0.30186	0.110939	0.142802	0.235612	0.235509	0.0743862	0.144501	0.25626	0.2194	0.307766	0.391537	0.201591	0.132684	0.032966	0.424192	0.121656	0.171179	0.120721	0.228939	0	0.341107	0.0874772	0.357823	0.0659914	0.166935	0.0717212	0.273761	0.0579575	0.097057	1.12797	0.0158879	0.372636	0.487858	0.357018	0.196927	0.109223	0.139941	0.0859414	0.515665
COL6A3	1.85608	3.06773	5.67033	11.8989	1.82914	3.36107	2.97652	10.4285	0.734149	1.04957	1.47687	3.51287	0.590978	1.05586	3.07986	1.2837	4.76017	2.54524	2.94443	2.0557	2.06016	5.38939	2.20466	0.798558	30.2333	5.55826	7.15402	2.73779	8.75734	1.26565	1.5578	4.81848	2.29106	3.95888	26.8527	3.15573	10.9802	0.431736	34.4923	3.68998	2.40649	1.24822	0.860392	2.167	7.51947	2.31069	5.74924	0.870664	4.0798
CXorf21	0.536733	0.222196	0.216136	0.824189	0.120494	0.238265	0.307513	1.70225	0.0941831	0.151577	0.41134	0.138834	0.166795	0.0884566	3.14223	0.162908	0.25317	0.448973	0.576591	1.26715	0.489986	0.277507	0.0581164	0.0577572	0.762751	0.817051	0.279915	0.211505	0.277688	0.16885	0.667936	0.191577	0.559745	0.18499	3.58945	0.376971	0.564276	0.0676951	0.935253	0.78422	0.0556718	0.230424	0.493118	0.268073	0.575035	0.612356	1.47108	0.240914	0.558017
SMIM10	0.345708	0.905654	1.18911	1.52622	0.48506	1.20854	0.742757	1.35681	0.796202	0.339964	0.92257	1.44193	0.151076	1.60241	0.728298	0.747615	1.26121	0.753079	9.58295	0.879116	0.591748	0.822618	0.736955	0.372012	1.60613	0.707878	1.56951	0.948745	2.01215	0.475807	1.23121	1.06428	1.08159	0.558521	2.60095	1.12298	2.45328	0.367894	1.2664	1.06074	1.31106	0.510178	0.19851	0.359719	1.70143	1.1093	0.753705	0.327316	1.82918
OR13A1	0.0915952	0	0	0	0	0.0203303	0	0.116198	0	0	0	0	0	0.025159	0.0541648	0	0	0.0425659	0	0	0	0.0215261	0.0247944	0	0.0834397	0.0151557	0	0.0257815	0	0.0240123	0	0.0326933	0	0.0197307	0	0	0.144443	0	0.266006	0	0	0.0163844	0	0	0	0.0326564	0.0570554	0	0.0226732
PTPN22	0.397991	0.160183	0.237431	0.294253	0.165457	0.137414	0.225208	0.182322	0.0969962	0.0356811	0.520455	0.1487	0.360732	0.133611	0.300727	0.107375	0.117329	0.29798	0.429808	0.433148	1.00924	0.301385	0.119705	0.0951717	0.281987	0.373167	0.205911	0.12447	0.305048	0.139115	0.115855	0.0947039	0.32282	0.123835	0.624325	0.372702	0.395169	0.0697171	0.805576	0.542737	0.0344008	0.205665	0.379192	0.441728	0.142131	0.425686	0.541732	0.0620275	0.580158
SLITRK4	0.0223388	0.0231194	0.00499754	0.0228685	0	0.0148748	0.0142208	0.0212542	0.0293992	0.00450617	0.0244571	0.0115565	0	0	0.00660502	0.00678021	0.0131711	0.0103812	0	0	0	0.0157498	0.066517	0	0.0406996	0.0147851	0.0249643	0.0125755	0.025683	0.00585627	0.00731564	0.00797344	0.0698896	0	0.658434	0.261492	0.00587128	0.042262	0.129751	0.0456949	0	0.00799185	0.0136823	0.00619843	0.0239329	0.00796444	0.0185533	0.0125335	0.016589
SALRNA1	0.159099	0	0	0	0	0	0	0	0.0418767	0	0	0	0	0	0.0282249	0	0.0281418	0	0.0244162	0	0	0	0	0	0	0	0	0	0	0.0250253	0.0312616	0	0	0	0	0	0.100358	0.090298	0	0	0.0990135	0	0	0	0	0.0680681	0.0396415	0	0
ENSG00000255367	0.0482033	0	0	0	0.108214	0	0.046029	0	0	0	0	0	0	0	0	0	0	0.0336014	0	0	0	0	0	0	0	0	0	0	0	0	0	0	0	0.0311506	0.0358182	0	0	0	0.190895	0	0	0.0258676	0	0	0	0.0515578	0	0	0.0357963
RP11-1094M14.7	0	0	0	0	0	0	0	0	0	0	0	0	0	0	0	0	0	0.0432422	0	0	0	0.0437363	0	0	0	0	0.0346623	0	0	0	0	0.0664255	0	0	0	0	0	0	0	0	0	0	0	0.0516381	0	0	0.193206	0	0
ENSG00000250686	0	0	0	0	0	0	0	0	0	0	0	0	0	0	0	0	0	0	0	0	0	0	0	0	0	0	0	0	0	0	0	0	0	0	0	0	0	0	0	0	0	0.0529267	0.271838	0	0	0	0.368613	0	0
B4GALNT1	0.0580572	2.34979	2.2377	0.229245	0.027929	0.441816	0.0950372	0.149933	1.06969	0.100382	1.31438	0.0579239	0.879539	0.129853	0.551766	0.445569	1.66509	0.225478	3.11843	16.3228	1.23795	0.0935606	0.0538828	0.0803245	0.435192	0.341712	0.630271	0.0350175	0.135881	1.74162	1.42597	3.13502	0.804402	0.117916	0.443729	0.0466013	0.0915547	0.41581	3.44878	0.814342	1.62591	3.36035	0.0152398	0.220928	0.393194	1.64114	0.325479	2.71527	0.412662
ENSG00000250129	0	0	0	0	0	0	0	0	0	0	0	0	0	0	0	0	0	0	0	0	0	0	0	0	0.0505287	0	0	0.0780626	0	0	0	0	0	0	0.137386	0	0	0	0	0	0	0	0	0	0	0	0	0	0
KRTAP4-1	0	0	0	0	0	0.0356149	0	0	0	0	0	0	0	0	0	0	0	0	0	0	0	0	0	0	0	0	0	0	0	0	0	0	0	0	0	0	0	0	0	0	0	0	0	0	0	0	0	0	0
MRGPRX3	0	0.0887794	0	0	0.0427945	0	0	0	0	0.0230718	0	0	0	0	0.033818	0	0.0337184	0	0	0.028726	0	0	0.0309609	0.020513	0.104192	0.0378501	0	0	0	0	0	0.0408244	0	0	0.0283295	0	0.0300612	0	0	0	0	0	0	0	0	0	0	0	0
CXCR2	0.0205435	0	0.0275754	0.0315459	0	0.0547176	0.0392336	0.0586383	0.0270365	0	0.0674746	0	0.0478806	0.0338568	0	0	0	0.0143204	0.0945817	0.0309576	0.0843941	0.057936	0.0166831	0.0552664	0.0673716	0.0611857	0.0918321	0.0346945	0	0	0.0403662	0.0879916	0.0128546	0.106207	0.0915909	0.101	0.064793	0.0971638	0.227798	0.126067	0.0958878	0.0551217	0.207615	0.0513025	0.0660284	0.0878923	0.0255934	0.0864468	0.198326
ENSG00000276399	0	0	0.0820406	0	0.039203	0	0	0	0.11491	0	0	0.28457	0	0	0	0	0	0	0	0	0	0	0	0	0	0	0	0	0	0	0	0	0	0	0	0	0	0	0	0	0	0	0	0	0	0	0.0761439	0	0
ENSG00000230515	0	0	0	0	0	0	0	0	0	0	0	0.109824	0	0	0	0	0	0	0	0	0.1938	0	0	0	0	0	0.0790804	0	0	0.111307	0.139044	0	0	0	0	0	0	0	0	0	0	0	0	0	0	0	0	0	0
PKMP1	0	0	0	0	0	0.0580409	0	0	0	0	0.0357863	0	0	0	0.0386587	0	0	0.0303803	0	0	0	0	0	0	0.0238211	0	0	0.0368017	0	0	0	0.0466679	0	0	0.0323846	0	0.0343641	0.041226	0.138076	0	0.0339038	0.0467757	0	0	0	0	0	0	0
POLR3KP2	0	0	0	0	0	0	0	0	0	0	0	0	0	0	0	0	0	0	0	0	0	0	0	0	0	0	0	0	0	0	0	0	0	0	0	0	0	0	0	0	0	0	0	0	0	0	0	0	0
GKN2	0	0	0	0	0	0	0	0	0	0	0	0	0	0	0	0	0	0	0	0	0	0	0	0	0	0	0	0	0	0	0	0	0	0	0.0298377	0	0	0	0	0	0	0	0	0	0	0	0	0	0
ENSG00000229727	0	0	0	0.0629359	0	0	0.0195684	0.136485	0	0	0	0	0	0	0.0727103	0	0	0	0	0.0154405	0.0280619	0	0	0	0	0.0101724	0	0	0	0.016117	0	0	0	0	0.137047	0	0.0161583	0	0	0.0179652	0	0	0	0	0.0164663	0.0657564	0.0127651	0.0172467	0.0152181
ENSG00000230266	0	0	0.0568215	0	0.0950322	0.0563752	0	0.0805529	0.111422	0	0	0.065698	0.0986622	0	0.375492	0	0.0748772	0	0	0	0.347803	0	0	0.0455525	0.046275	0	0.141921	0	0.21901	0.0665852	0.0831781	0	0	0	0	0	0	0	0.134114	0.0742208	0	0	0	0	0	0.271665	0.0527374	0	0.125744
ENSG00000240033	0	0	0	0	0	0	0	0	0	0	0	0	0	0	0	0	0	0	0	0	0	0	0	0	0	0	0	0	0	0	0	0	0	0	0	0	0	0	0	0	0	0	0	0	0	0	0	0	0
ENSG00000237576	0	0	0	0	0	0	0	0	0	0	0	0	0	0	0	0	0	0	0	0	0	0	0	0	0	0	0	0	0	0	0	0	0	0	0	0	0	0	0	0	0	0.104304	0	0	0	0.103946	0	0	0
ENSG00000266521	0.153293	0	0.205765	0.235392	0	0.306223	0	0	0	0	0	0	0	0.63159	0	0	0	0	0	0.115501	0	0	0	0.0824785	0	0.760935	0.0856551	0	0.132182	0.120561	0	0	0	0	0.569535	0	0	0.29001	0.485659	0	0	0	0	0	0	0	0.763901	0	0
ENSG00000256481	0	0.0703848	0	0	0	0.06038	0	0.776477	0	0	0	0	0	0	0.0804333	0	0	0.0632092	0	0	0	0	0.0736379	0	0.0495623	0	0.101335	0	0	0	0	0	0	0.058599	0	0	0	0	0	0	0	0	0.083309	0	0	0	0.0564838	0.152628	0
RP11-472E5.3	0	0	0	0	0	0	0	0	0	0	0	0	0	0	0	0	0	0	0	0	0	0	0	0	0	0	0	0	0	0	0	0	0	0	0	0	0	0	0	0	0	0	0	0	0	0	0	0	0
AGRP	0.0868796	0.0674367	0.0583089	0.266819	0	0.115702	0.580724	0	0.114339	0	0.142677	0	0.101245	0.429547	2.54312	0	0.307349	0.181685	1.99996	0.0654606	0.118969	1.47009	0.0705536	0.327215	0.142459	0.0431263	0	0	1.27355	0.614955	0	0	0.0543627	0.112289	0.0645572	0.0610193	3.21966	0.0821823	0.206437	0.228491	0.0675858	0.0466226	0.558738	0.289282	0.349048	0	0.162354	0.146235	0.451624
ENSG00000240476	0	0	0	0	0	0	0	0	0	0	0.0566555	0.0535418	0	0	0	0	0	0	0	0	0	0	0	0	0	0	0	0	0	0	0	0	0	0	0	0.0484603	0.217616	0	0	0	0	0	0	0	0.0554412	0.147599	0.0429793	0	0
RPL7P18	0	0	0	0	0.101506	0.0602154	0	0.0860401	0	0.0547248	0	0	0	0	0	0.823417	0	0	0	0	0.123832	0.127514	0	0	0.0494272	0	0	0	0.0779763	0	0	0	0.0565846	0.0584393	0.0671958	0	0.142606	0	0.0716247	0	0.0703482	0	0	0	0.0726628	0	0.0563299	0.228318	0
FCGR2A	2.89786	1.03741	0.729334	2.01394	6.0709	1.44721	2.25427	6.48885	1.70962	1.31525	2.31795	0.765727	1.48472	0.63815	0.952848	0.636916	11.7982	1.40183	2.94245	6.49383	2.24067	0.907071	0.314451	0.880396	4.55372	7.93641	1.47964	1.78251	6.53772	3.30074	1.7303	0.856006	1.17237	4.10056	6.83116	1.48261	0.866695	14.1785	13.3163	2.49664	0.651032	0.375367	2.99517	0.987771	2.25823	8.44352	4.50497	2.3232	5.45416
TCEA1P3	0.226282	0	0	0	0	0.150675	0	0.0717653	0	0.0456455	0	0	0	0	0.0669058	0	0.0667088	0.105157	0	0	0	0.0531793	0	0	0.0412268	0	0	0	0	0	0	0	0	0	0.616521	0.0529759	0	0	0.0597415	0	0	0	0	0	0	0	0	0	0.168039
ZBTB8B	0	0.00401446	0.00347109	0	0.0058053	0.0103315	0	0.0147624	0	0.00625962	0.00424673	0.00802669	0	0	0.00458759	0.00470927	0.00457408	0.0108156	0.00793708	0.00389683	0.00708216	0.00729279	0.00420001	0.0111308	0.00282683	0.00513456	0	0	0.00445961	0.00813508	0.0152435	0	0.00323618	0.00334225	0.0076861	0.00726489	0.00407796	0.0244613	0.00409635	0	0	0.00277541	0	0.00861038	0	0	0.0225513	0.00435265	0.0038407
USP29	0.0170457	0	0	0	0	0	0	0	0	0	0	0	0	0	0	0	0	0	0	0	0	0	0	0	0	0	0	0	0	0	0	0	0	0	0	0	0	0	0	0	0	0	0	0	0	0	0	0	0
IL22	0	0	0	0	0	0	0	0	0	0	0	0	0	0	0	0	0	0	0	0	0	0	0	0	0	0	0	0	0	0	0	0	0	0	0	0	0	0	0	0	0	0	0	0	0.0452754	0	0	0	0
ENSG00000255094	0	0	0	0	0	0	0	0	0	0.0498362	0	0	0	0	0	0	0	0	0	0	0.11277	0	0	0	0	0	0	0	0	0	0.0809077	0	0	0	0.0611932	0	0	0	0	0.14439	0	0	0	0	0	0	0	0	0
FAM181B	0	0.0525195	0.0227054	0	0	0.0450542	0.0161524	0.0160942	0	0	0.0277791	0	0	0.055755	0	0	0.0149602	0	0	0	0.0231632	0	0	0.118316	0	0	0.0283553	0.0285673	0	0	0	0.018113	0	0	0.0377077	0	0	0	0.0267954	0	0	0.00907739	0.0155408	0	0	0	0.0105367	0	0.0376846
RPS3AP24	0	0	0.0606921	0	0	0	0.0863513	0	0	0.0547248	0	0	0	0	0	0	0	0	0	0	0	0	0	0	0	0.0897779	0	0	0	0	0	0	0	0	0	0	0	0	0	0	0	0	0	0	0.145326	0	0.675958	0	0
ENSG00000234497	0	0	0	0	0	0.00822903	0	0	0	0	0	0	0	0	0	0	0	0	0	0	0	0	0	0	0	0	0	0	0	0.00971939	0	0	0.00773284	0	0	0	0	0	0	0	0	0	0	0	0	0	0	0	0
EMR3	0.0233965	0	0	0	0	0	0.0223412	0	0.0307913	0	0	0.0544666	0.0272651	0	0.0415066	0.0426075	0	0.0815459	0	0	0	0.0329911	0	0.0377651	0.012788	0.0348415	0.0130732	0	0.0201744	0	0.0229861	0	0	0.0907179	0.0173852	0.0164324	0.0737914	0	0.0741242	0.143576	0	0	0.064486	0.0194758	0	0	0	0	0
GS1-410F4.5	0	0	0	0	0	0	0	0	0	0	0	0	0	0	0	0	0	0	0	0	0	0	0	0	0	0	0	0	0	0	0	0	0	0	0	0	0	0	0	0	0	0	0	0	0	0	0	0	0
ENSG00000226497	0	0	0	0	0	0	0	0	0	0	0	0	0	0	0	0	0	0	0	0	0	0	0	0	0	0	0	0	0	0	0	0	0	0	0	0	0	0	0	0	0	0	0	0	0	0	0	0	0
RNASE3	0	0	0	0	0	0	0	0	0	0	0	0.0715379	0	0	0	0	0	0	0	0.069461	0	0.064997	0	0	0	0.0457618	0	0	0	0	0	0	0	0	0	0	0	0	0	0.0808182	0	0	0	0	0	0	0	0	0.0684604
ENSG00000233730	0	0	0.181458	0	0	0	0	0	0	0	0	0	0	0	0	0	0	0	0	0	0	0	0	0	0	0	0	0	0.116567	0	0	0	0	0.0873614	0	0	0	0	0	0	0	0	0	0	0	0.144593	0	0	0.10039
ENSG00000280395	0	0	0	0	0	0	0	0	0	0	0	0	0	0	0	0	0	0.0125289	0	0	0	0	0	0	0	0	0	0	0	0	0	0	0	0.0116151	0	0	0	0	0	0	0	0.00964518	0	0	0	0.0192242	0	0.0151264	0
PSG11	0	0	0	0	0	0	0	0	0	0	0	0	0	0	0	0	0	0	0	0	0	0	0	0	0	0	0.0147411	0	0	0	0	0	0	0	0	0	0	0	0	0	0	0	0	0	0	0	0.00821664	0	0
SELM	14.1833	37.6026	25.2164	17.7817	7.17701	10.3041	4.55427	24.8294	0.877111	1.3486	2.65074	2.95759	8.5676	5.30309	1.33014	1.70677	7.47842	14.9391	12.2896	7.65793	12.9194	4.08214	3.7886	20.8205	4.62175	4.83837	4.53862	2.6556	10.4341	4.38982	2.18941	2.63159	4.83488	3.23021	14.5164	5.895	3.74419	0.768341	4.96528	4.69238	1.6526	1.33001	1.85606	1.42163	3.51435	45.8226	1.88114	33.4611	35.7739
AC104131.1	0	0	0	0	0	0	0	0	0	0	0	0	0	0	0	0	0	0	0	0	0	0	0	0	0	0	0	0	0	0	0	0	0	0	0	0	0	0	0	0	0	0	0	0.0925508	0	0	0.103885	0	0
ENSG00000263477	0	0	0	0	0.0834326	0	0	0	0	0	0	0	0	0	0	0	0	0.0518132	0	0	0	0	0	0	0	0.0368964	0	0	0	0	0	0	0	0	0	0	0.0586076	0	0	0	0	0.0797753	0	0.0618732	0	0	0	0	0
DCAF12L2	0.233554	0	0.0626996	0	0.209726	0	0	0.044443	0	0	0	0.144989	0	0	0	0	0	0	0	0	0	0.032933	0	0.0753973	0	0.0231868	0	0.11833	0	0	0	0	0	0	0	0.0984211	0	0.176741	0	0.0818989	0	0	0	0	0.187665	0.0999226	0.0290965	0	0
ENSG00000253865	0.112884	0	0.303048	0	0.253419	0.0751669	0	0	0	0.0683129	0	0	0	0	0.100131	0	0	0	0	0	0	0	0	0	0	0.11207	0	0	0	0	0	0	0.0706345	0	0.0838805	0	0	0.213562	0	0.0989611	0	0.0605777	0.103711	0	0	0	0	0	0
ENSG00000278095	0.116042	0	0	0	0	0	0	0.220816	0	0.140448	0	0	0	0	0	0	0	0	0	0	0	0	0	0	0	0	0.0648403	0	0	0	0	0	0	0.0749903	0.0862268	0	0	0	0	0	0	0	0	0	0	0	0.0722834	0	0
ENSG00000265316	0	0	0	0	0	0	0	0	0	0	0	0	0	0	0	0	0	0	0	0	0	0	0	0	0	0	0	0	0	0	0	0	0	0	0	0	0	0	0	0	0	0	0	0	0	0	0	0	0
RPL38P3	0	0	0	0	0	0	0	0	0	0	0	0	0	0.256787	0	0	0	0	0	0	0	0	0	0	0	0.154688	0.174125	0	0	0	0	0	0	0	0	0	0	0	0	0	0	0	0.286301	0	0	0	0.194113	0	0
ENSG00000257747	0	0	0	0	0	0	0	0	0	0	0	0	0	0	0	0	0	0	0	0	0	0	0	0	0	0	0	0	0	0	0	0	0	0	0	0	0	0	0	0	0	0	0	0	0	0	0	0	0
RP11-510M2.8	0	0	0	0	0	0	0	0	0	0	0	0	0	0	0	0	0	0	0.263898	0	0	0	0	0	0	0	0	0	0	0	0	0	0	0	0	0	0	0	0	0	0	0	0	0	0	0	0	0	0
ENSG00000257859	0	0	0.0344532	0	0.028811	0.0170913	0	0	0.0337799	0	0.021076	0.0199177	0.0299115	0	0	0	0.0454012	0.0357843	0.0196954	0	0	0	0.0625324	0	0.0140292	0.0127411	0.0143421	0.021674	0	0.0201867	0	0	0.0160607	0.0331744	0.0572178	0.0360547	0.0404769	0	0	0.0225016	0.0199673	0	0.0471634	0	0.0206243	0.192175	0.223838	0	0.0381218
ENSG00000234953	0	0	0	0	0	0	0	0	0	0	0	0	0	0	0	0	0	0	0	0	0	0	0	0	0	0	0	0	0	0	0	0	0	0	0	0	0	0	0	0	0	0	0	0	0	0	0	0	0
RCOR2	0.0727275	0.620969	0.195243	0.521164	0.0272116	0.548845	0.023149	0.138393	0	0.0146706	0.039812	0.112872	0	0.159812	0.0645111	0.220741	0.107202	0.659057	0.055806	0.0365317	0.0331967	0.376023	0	0.0652176	0.34451	0.0722027	0.0541836	0.0204708	0.376269	0	0	0.0259588	0.0606765	0.0156663	1.65727	0.0681063	0.841055	0.0458636	0.633636	0.0637573	0.113153	0.0910656	0.0222725	0.06054	0.0584381	0.414872	0.256714	0.102012	0.288044
DIRAS2	0	0.211491	0.0101592	0	0.0169909	0	0.0144543	0.993749	2.66945	0	1.8644	0.0234925	0.12348	0.0249467	0	0	0.0133874	0.263792	0.0348453	0	0	0.512268	0	0.040722	0.0910092	0	0.0845808	0	0	0	0.0148715	0	0.0284149	0.0684746	1.15853	0.0956828	0.0358061	1.67528	2.54171	0	0	0	0	0	8.44108	0.0161904	0	0.993667	0.112409
LINC00595	0.0288842	0	0	0	0	0	0	0	0	0	0.0474348	0	0	0	0	0	0.0255456	0	0	0.0217632	0	0	0	0	0.0157875	0	0	0	0	0.249883	0	0	0	0	0	0	0	0	0	0	0	0	0.0265371	0	0	0	0	0.0243089	0.0214497
CTLA4	0.626189	0.315935	0.315198	0.384622	0.035144	0.0416964	0	0.178736	0.288436	0.13263	0.668428	0.0485918	0.583782	0.232199	0.416584	0.0570177	0	0.480152	0.0960986	0.235905	2.82967	0.0220744	0.330537	0.0505375	0.17113	0.108792	0.174947	0.370135	0.620942	1.87142	0.0307602	0.0335261	0.254684	0	0.488564	0.04398	0.197497	0	0.471169	1.29004	0	0.0336035	0.258887	1.51163	0.0754733	0.401859	1.11166	0	0.372011
ENSG00000272666	0.330777	1.11259	0.37	0	1.98021	0.807607	0.210571	0	0.58043	0.400346	1.90125	0.342241	0.256981	1.09028	0.586815	0.803173	0.292543	2.53635	0.67684	0.830763	4.68051	2.25438	1.70126	0.949187	0.180795	1.0399	1.10896	2.32761	1.61626	1.1273	0.4333	0.472261	3.17362	0.0712532	0.409649	2.55551	0.173876	0.625786	0.611309	2.70647	1.2866	0.118338	0.303898	1.28495	1.24034	0.471728	0.824175	0.649557	2.12887
ENSG00000281656	0	1.07337	0	0	0	0	0	0	0	0	0	0	0	0	1.22661	0	0	0	0	0	0	0	0	0	0	0	0	0	0	0	0	0	0.865272	0	0	0	0	0	1.09526	0	0	0.742076	0	0	0	0	0	0	0
ENSG00000262213	0	0	0	0	0.219133	0	0	0.185745	0	0	0	0	0.227503	0	0	0	0	0	0	0	0	0	0	0	0	0	0	0	0	0	0	0	0	0	0	0	0.153931	0	0	0	0	0	0	0	0	0	0.121606	0	0
PAX9	0.0109985	0	0.0221448	0.0506668	0	0.00732363	0	0	0	0.00665584	0	0	0	0	0	0.0100147	0	0	0	0	0	0	0	0	0	0	0.030728	0	0.00948378	0.0173	0.0108056	0.0117772	0.0137641	0	0.0490357	0.0386237	0.00867217	0.0520193	0.540099	0	0	0.0118044	0.0101048	0.0091554	0.0176751	0	0.0411063	0.00925633	0
PPP1R26P1	0.0183714	0.0427802	0.0123299	0	0.371186	0.0122331	0	0.0174795	0.0483558	0	0	0	0.0428182	0	0	0.0334563	0	0	0.0281939	0.0138422	0.0503141	0	0	0.0296539	0	0.0911942	0.0205307	0	0	0	0	0	0.0229909	0.0118723	0.0136512	0.0129031	0	0	0	0	0.0857496	0	0.0337571	0	0.0147618	0.0196499	0.0572186	0.0154614	0
CTXN3	0	0	0	0	0	0	0	0	0	0	0	0	0	0	0	0	0	0	0	0	0	0	0	0	0	0	0	0	0	0	0	0	0	0	0	0	0	0	0	0	0	0	0	0	0	0	0	0	0
GPR115	0	0	0	0	0	0	0	0	0.0515215	0	0	0	0	0.0161297	0.0173628	0	0	0	0	0	0	0	0	0	0	0	0.0109374	0	0	0.0153945	0	0	0	0	0.0436347	0	0.0617359	0	0.0155036	0	0	0	0	0	0	0	0.0121929	0	0
ENSG00000254208	0	0	0.0951881	0	0.159199	0	0	0	0	0	0.116459	0	0.33056	0	0	0	0	0	0.10883	0	0	0	0	0	0	0	0	0.119763	0	0.334633	0	0	0	0.0916548	0.316165	0	0	0	0.112335	0	0.110332	0	0	0.118062	0	0	0	0	0.210647
ENSG00000269460	0	0	0	0	0	0	0	0	0	0	0	0	0	0	0	0	0	0	0	0	0	0	0	0	0	0	0	0	0	0	0	0	0	0	0	0	0	0	0	0.201346	0	0	0	0	0	0	0	0	0
ENSG00000217455	0	0	0	0	0	0.0256221	0	0.0366107	0	0	0	0	0	0	0	0.035037	0	0	0	0	0	0	0	0	0.0210316	0	0	0	0.0331795	0	0	0	0	0	0	0	0.03034	0	0.0304768	0	0	0	0	0	0	0	0.0479375	0	0
PNMAL1	0	0.376376	0.12053	0.0551541	0	2.53517	0.13719	0.95687	0.0945398	0	0.0294927	0.0278719	0	0.0443958	9.84472	0.0163525	0	0.162743	0.0275607	0	0	0.0253235	0	0.0579759	0.353373	0.0178293	0.0903133	0	0.154856	0.0141241	0.0705753	0.115382	0.0224746	0	3.30947	0.0378399	0.155764	0.424697	4.96424	0.0787191	0.0139707	0.163835	0.428987	0.0597974	0.0144303	0	0.223734	0.0755708	0.146701
ENSG00000275467	0	0.113234	0	0	0	0	0	0	0	0	0	0	0	0	0	0	0	0	0	0	0	0	0	0	0	0	0	0	0	0	0	0	0	0	0.108399	0	0.115025	0	0	0	0	0	0	0	0	0	0.272612	0	0
MMP14	12.5496	49.5134	16.7155	70.0732	44.9468	26.0694	35.4535	45.3562	18.9621	15.7109	16.3117	28.5459	18.9392	12.1668	9.1402	17.1676	33.9808	22.0566	23.0473	43.1443	14.2936	33.2009	4.41946	20.7767	38.9047	26.6156	21.2529	11.5513	27.6942	23.786	19.5898	46.5556	8.44804	38.4551	140.143	13.2943	19.4855	68.1742	209.301	15.2121	10.3757	12.4637	14.4942	17.5388	15.9502	36.2291	14.7916	28.5567	36.0963
ENSG00000234663	0.0223941	0	0	0	0	0	0	0.0426137	0	0	0.0551646	0.0173776	0	0.0184533	0.0595923	0.0407819	0	0.0312208	0.0687345	0.0506194	0.0919964	0	0	0.012049	0.0244802	0.0222324	0.0250261	0.0567297	0.0386199	0.0880614	0.0440024	0	0.0420375	0	0.0332805	0.0157283	0.0176574	0	0.0532111	0.0588959	0.0348418	0.0120174	0.0411486	0.0932065	0.0179941	0	0.0697472	0.0188468	0.0332601
ENSG00000279047	0.390907	0	0	0	0	0	0	0	0	0	0	0.0606681	0	0	0	0	0	0	0	0	0	0	0	0	0	0	0	0	0	0	0	0	0	0	0	0	0	0.0369772	0.0309615	0	0	0	0	0	0	0	0.0243499	0	0
LINC00540	0	0	0	0	0.109526	0	0	0	0.0321039	0	0	0	0.0852824	0.0201013	0	0	0.0215743	0	0.0374364	0	0	0.0171988	0	0	0	0.012109	0	0	0.0210344	0	0	0.026121	0.0152639	0	0	0	0	0	0.019321	0	0	0	0.0224117	0	0	0	5.18156	0	0
ENSG00000249007	0.403501	1.14841	0.315944	0.103267	1.58522	0.313462	0.256867	0.383911	0	0.529062	0	0.104371	4.93731	0.221664	0.656179	0.244939	0.178431	0.32815	1.08366	0.253353	2.02597	0.0948284	0.109226	0.325652	0.14703	0.13353	0.789121	0.454297	1.27575	0.264452	0.0660705	0.144023	0.841602	0.130378	2.39862	0.141698	0.159078	1.08144	2.1306	0	0	0	0.370713	0.111961	0.162111	0.0719301	0.293235	2.32051	0.0998815
ENSG00000276631	0	0	0	0	0	0	0	0	0	0	0.0914473	0	0	0	0.0987872	0	0	0	0	0	0	0	0	0	0	0	0	0	0.0960312	0	0	0	0	0	0	0	0	0	0	0	0	0	0	0	0	0.119119	0.0693727	0	0
CHI3L2	0.100722	0.12509	0	0	0.0226116	0.0268274	0	0.0766658	0.132557	0.0365718	0.099246	0.0312639	0.0234753	0.149396	0.0714745	0.0366851	0.124712	0.0982956	0.0309149	0.0910688	0.27585	0.0284054	0.0490771	0.054193	0.0330315	0.149993	0.0562802	0.0510309	0.138961	0.0792152	0.0395822	0.0215706	0.0882341	0.0390541	0.164655	0.042445	0.190604	0	0.175508	0.141279	0.0783544	0.0756715	0.07403	0.25153	0.420849	0.474018	0.464281	0.0169535	0.119676
AC093850.1	0	0	0.177482	0.406075	0.890501	0.176088	0.505035	0.251607	0	0	12.5942	0	1.54086	0.435822	0	0	0.233879	0.368679	0	7.57153	0.362121	0	0.214753	0.142284	0.28908	0.131269	0	0	0.228026	0.415959	0	0.283168	0	0	0	0	0.208512	0.500297	0	0.231829	0	0.283822	0.242957	0	0.212488	0.848546	0.164726	1.33534	0.196381
LEMD1	0	0	0.0202583	0	0.0338814	0	0	0	0	0	0	0	0	0.024873	0	0	0	0.021041	0	0	0	0.0212814	0.0245125	0.0162406	0	0	0	0	0.10411	0	0	0	0	0	0	0	0	0.0285526	0.047815	0	0	0	0	0	0	0	0	0	0
ENSG00000261295	0.305411	0.395105	0.341626	0.156326	0	0.203366	0	0.193722	0.13398	0.246429	0.752336	0	0.35591	0.083889	0.270907	0.0926975	0.360146	0.496755	0.234351	0.230116	0.557622	0.574206	0.0826733	0.10955	0.667722	0.353741	0.398191	0.0859646	0.351133	0	0	0	0.254804	0.065789	2.72328	1.21552	0.722437	0	1.53202	0.178494	0.475174	0.0546314	1.02884	0.932179	1.06342	0.435552	0.4439	0	0.302402
ENSG00000235356	2.16208	0	0	0	0	0	0	0	0	0	0	0	2.26762	0	0	0	0.191217	0	0	0	0	0	0	0	0	0	0	0	0	0	0	0	0	0	0	0	0	0	0	0	0	0	0	0	0	0.231254	1.34678	0	0
KIF3C	0.404289	0.539114	0.82097	1.25754	0.127996	0.283012	0.366255	1.00604	0.259213	0.188199	0.255361	0.458522	0.144965	0.230639	0.478153	0.311491	0.687612	0.780426	0.493175	0.546749	0.624593	0.584699	0.202041	0.223103	1.32585	1.51286	0.94416	0.245099	0.518446	0.236433	0.570334	0.510614	0.214055	0.884283	4.46769	0.415004	1.24241	0.960979	6.77376	0.499829	0.266121	0.261459	0.447628	0.500494	0.866279	0.609828	0.471383	1.55293	0.846801
TIMD4	0.213428	0	0.229186	0	2.39567	0.0284232	0.12228	0.0812263	0.0561767	0.154989	1.22675	0.132495	0.397948	0.597959	0.340768	0.0388674	0.0377516	0.505836	0.163769	0.096486	0.233807	0.0300951	0.0346643	0	0.0699928	0.0635662	0.286215	0	0	0.268568	0.12581	0.0457076	0.373931	0.137924	0.222027	2.42837	0.201942	0.201888	1.08188	0.0374207	0.0332061	4.46678	0.509819	0.0355324	0.0342987	0.045656	0.877442	2.51468	0.602276
RP11-479G22.7	0	0	0	0	0	0	0	0	0	0	0	0	0	0	0	0	0	0	0	0	0	0	0	0	0	0	0	0	0	0	0	0	0	0	0	0	0	0	0	0	0	0	0	0	0	0	0	0	0
ENSG00000234477	0.895872	0	0.218641	0	0	0.0542308	0.0777692	0.852378	0	0.0985718	0	0	0.474547	0.201334	0.0722419	1.33484	0.0720291	0	0.437455	0	0	0	0	0.350559	0	0	0.0455076	0	0.140453	0	0	0	0.458647	0	0.605174	0	0.128433	0	0	0.0713977	0	0.0437051	0.823073	0	0.130882	0	0	0.137084	0
PDZD3	0.0173441	0.188477	0.0931237	0	0.11681	0.11549	0	0.0330041	0	0.0314879	0.0284832	0.0134589	0.121272	0	0.0153847	0.0157927	0.0766968	0.060451	0.0133087	0.14375	0.0712509	0.0244567	0.0140849	0	0.0284397	0.0774853	0.193826	0	0.119644	0.040922	0.102239	0.148576	0.0434106	0.0112084	0.0515513	0.0121815	0.0410268	0.0328128	0.274746	0	0	0.00930746	0.0159347	0.0433129	0.0278727	0.16696	0.237683	0	0.0772796
ENSG00000243187	0	0	0	0	0.26327	0	0	0.223157	0	0	0	0	0	0	0	0	0	0	0	0	0	0	0	0	0	0	0	0	0	0	0	0	0	0	0	0	0	0	0	0	0	0	0	0	0	0	0	0	0
DNAJB13	0.019101	0.0296527	0.0256392	0	0.0214404	0.0254378	0	0.127216	0.0251381	0.0231183	0.0313684	0.0296445	0.0222593	0	0.0508292	0	0.0168932	0.0532595	0	0	0.0523122	0.067335	0.0155116	0.0102772	0	0.0284447	0.010673	0	0.0988224	0	0.0562978	0.0818132	0.0478079	0	0.141933	0.0134155	0.0301218	0.10841	3.1014	0.0167451	0	0.0102503	0	0.0318002	0.0767402	0.163442	0.26176	0	0.0141846
AC018641.7	0.0833869	0.323628	0.391754	0	0.187199	0	0	0.555369	0.109742	0	0	0	0	0	0	0.0759281	0	0.116254	0	0	0.913492	0	0	0.0448658	0	0	0	0	0	0	0	0	0	0	0.123924	0	0.0657495	0	0	0	0	0	0.0766108	0	0	0.0891897	2.44129	0	0
RUFY4	0.182812	0.0354751	0.38853	0.49126	0	0.24346	0	0	0.0400986	0.0184384	0.112583	0.0236434	0.0887665	0.0376605	0.0675662	0.0277433	0	0.084956	0.0116897	0.0573926	0.917895	0.0322225	0.0371147	0.00819674	0.0749406	0.0529354	0.0340497	0.0385923	0.459769	0.0119814	0.0748354	0.0489387	0.0476625	0.00984495	0.0113201	0.042799	0	0.201749	0.675709	0.22704	0	0.0408764	0.125967	0.0760883	0.0367233	0.0651779	0.597844	0.243603	0.407274
ENSG00000241345	0	0	0	0	0	0	0	0	0	0	0	0	0	0	0	0	0	0	0	0	0	0	0	0	0	0	0	0	0	0	0	0	0	0	0	0	0	0	0	0	0	0	0	0	0	0	0	0	0
EVI2B	2.97923	1.09409	1.935	2.06604	0.611288	1.53584	1.31536	1.82877	1.9815	0.911147	5.15565	1.09378	1.38127	0.976708	2.21642	0.875079	2.15323	3.03697	2.40896	5.69634	5.04471	1.28739	1.0406	0.586027	3.90461	2.30576	2.14799	1.13613	3.17663	2.14153	4.94123	1.09769	2.74615	1.51124	3.6182	3.55491	2.75323	0.818173	7.3835	9.09907	0.79746	1.87381	5.20939	3.4133	2.16221	4.18021	2.81361	2.31859	8.30248
CHST3	0.238077	0.620921	0.581617	2.42748	0.641365	1.83895	0.400115	14.5787	0.375989	0.547484	0.758501	0.849833	0.0665863	0.541463	1.0559	0.927826	1.2802	0.7966	0.906112	0.444869	0.586823	1.20184	0.402146	0.271564	2.08204	1.29998	1.19727	0.876519	1.02645	0.254648	0.374242	1.58058	0.697183	0.430791	9.87849	0.62203	2.50044	0.162148	2.93411	1.1187	0.51117	0.347509	0.411214	0.737233	1.36206	0.611148	0.717773	1.79528	3.97444
RRM2P3	0	0	0	0	0	0	0	0.0543022	0	0	0	0	0	0	0	0	0.0504761	0	0	0	0	0.0804778	0	0	0	0.0283306	0	0	0	0	0	0	0	0	0	0	0	0.0539873	0.0452043	0	0	0	0	0	0	0	0.177756	0	0
GSDMA	0.0892951	0.0231039	0.319627	0.137118	0.100231	0.0792792	0.0852671	2.29391	0.15669	0.0360251	0.366609	0.115487	0	0.0245272	0	0.0271026	0.157947	0.165988	0.251235	0.605526	0.163036	0	0	0.0640595	0.0488066	0.251177	0.182949	0	0.153995	0.257503	0.0292429	0.0956169	0.111748	0	0.0884694	0.125432	0	0.168934	0.424353	0.156563	0	0.0159729	0.0273463	0.0991082	0	0	0.0741635	0.275552	1.01678
OR10AC1	0	0	0	0	0	0	0	0	0	0	0	0	0	0	0	0	0	0	0	0	0	0	0	0	0	0	0	0	0	0	0	0	0	0	0	0	0	0	0	0	0	0	0	0	0	0	0	0	0
EGR2	0.251901	0.474854	0.26567	0.524958	0.12118	0.323489	0.103088	1.57498	0.118399	0.0871087	0.132969	0.376985	0.545169	0.770988	0.430925	0.147452	0.811572	0.614581	1.64298	0.569396	0.615969	1.44618	0.0584472	0.145215	1.6227	0.214357	1.89013	0.926806	0.434418	0.127358	0.371224	0.308269	0.743069	0.104649	1.93864	0.176921	1.40453	0.0340402	5.70047	0.772911	0.139972	2.10493	0.363678	0.434354	1.37348	0.250186	0.661269	0	0.574555
ENSG00000259669	0	0	0	0	0	0	0	0	0	0	0	0	0	0	0	0	0	0	0	0	0	0.0361373	0	0.0275777	0	0	0	0	0	0	0	0	0	0	0	0	0	0	0	0	0	0	0	0	0	0	0	0	0
ENSG00000258903	0	0	0	0	0	0	0	0	0	0	0	0	0	0	0	0	0	0	0	0	0	0	0	0	0	0	0	0	0	0	0	0	0	0	0	0	0	0	0	0	0	0	0	0	0	0	0	0	0
FAM195CP	0	0	0.174356	0	0	0.0864934	0.124035	0	0.512846	0	0.319976	0.100797	0.302744	0.642219	0	0	0	0	0	0.195741	0.355743	0	0.632912	0.209666	0.425983	0.0644784	0.145161	0	0.112005	0.408633	0.255231	0.417272	0	0	0.09652	0.182461	0	0.122871	0.102882	0.113873	0	0.348529	0	0	0	0.416801	0.242737	0	0
ENSG00000258945	0	0	0	0	0	0	0	0	0	0	0	0	0	0	0	0	0	0	0	0	0	0	0	0	0	0	0	0	0	0	0	0	0.0645927	0	0	0	0	0	0	0	0	0	0	0	0	0	0	0	0
KIR2DL4	0	0.0298849	0.0258399	0.118242	0.0432165	0	0.0735289	0	0.10134	0.0232993	0.284526	0.17926	0.0448673	0.063452	0.136606	0	0.306458	0.134191	0.0590861	0.203065	0.105444	0.0542898	0.0937987	0.0207153	0.0420877	0.0955582	0	0.032511	0.0995962	0.363361	0.189129	0.206135	0.120456	0.0995231	0	0.0270411	0.0607153	0	0.33544	0.371276	0	0.0206611	0.106118	0.0640984	0	0.0823608	0.215844	0.0324025	0.142957
MUC1	0.0562866	0.174761	0.0755532	0.194472	0.0315901	1.87399	0.483729	0.0803308	0.0185191	0.689762	0.219536	0.065517	0.147585	0.916039	0.112337	0.281885	0.0622257	0.205989	1.71682	0.0742174	0.269768	0.396844	0.239975	0.234706	0.138442	0.0419103	0.188706	0.0118823	1.85645	0.221339	0.152073	0.391765	0.563518	0.118217	1.05607	0.118598	0.52148	0.173041	3.64453	0.197377	0.262721	0.0679621	0.0258564	0.16399	0.146989	0.361221	0.50839	0.48555	0.595636
HELT	0	0	0	0	0.0602793	0	0	0	0	0	0	0	0	0	0.0952705	0	0	0.0748692	0	0	0	0	0	0	0	0	0	0	0	0	0	0	0	0	0	0	0.0423435	0	0	0	0	0	0	0	0	0	0	0	0
ENSG00000227925	0	0.121801	0	0.240957	0	0	0	0	0	0	0	0	0	0	0	0	0.416338	0	1.92651	0	0	0	0	0	0	0.233677	0	0	0.135306	0	0	0	0	0	0	0.11021	0	0	0	0	0	0	0	0.130621	0.126086	0	0.19549	0	0
ENSG00000237993	0	0	0	0	0	0.0626924	0	0	0	0	0	0	0	0	0.0835137	0.0857288	0	0	0	0	0	0	0	0	0	0	0	0	0	0	0	0	0	0	0	0	0	0	0.074571	0	0	0	0	0	0	0	0.058647	0	0
CD163	2.70619	1.13449	2.437	3.94513	5.10117	1.93885	2.01714	1.40148	3.42627	6.46779	9.22597	2.2772	11.5102	2.06061	2.63342	0.655022	1.65619	7.75265	3.46967	13.8688	3.33048	4.17018	1.38165	0.896976	7.94494	5.07859	2.64782	2.27551	5.60236	1.74219	19.3515	7.91084	4.07972	4.93659	5.03144	8.44479	2.85407	1.05852	4.115	5.52562	2.15851	6.92417	5.74888	8.22186	4.24804	5.1051	5.09981	5.78512	11.6
ENSG00000236388	0	0	0	0	0	0	0	0	0	0	0	0.172265	0	0	0	0	0	0	0	0	0	0.156514	0	0	0.121336	0	0	0	0	0	0	0	0	0	0	0	0	0	0.175828	0	0	0	0	0	0	0	0	0	0
ENSG00000159753	0.387962	0.1673	0.219876	0.145626	0.0774181	0.321483	0.0411624	0.139448	0.09077	0.0260865	0.25485	0.0802815	0.210985	0.305483	0.160595	0.180555	0.205871	0.492801	0.251387	0.168893	1.0271	0.085098	0.126023	0.0510254	0.0753959	0.166904	0.183059	0.0873604	0.661629	0.664486	0.118582	0.0276953	0.512488	0.0557143	0.35875	0.16349	0.285509	0.138639	0.245826	0.400575	0.0402407	0.157302	0.403961	0.444951	0.0484922	0.285861	0.82166	0.195905	0.729865
DPF1	0	0.0644021	0.0185617	0	0	0.110495	0.0924319	0.013157	0.0545967	0.00836833	0.0227094	0	0.0161148	0.102554	0.0490643	0	0.122299	0.048197	0.0212218	0.0729341	0.113616	0.0487477	0.0112298	0.0223207	0.12849	0.0686427	0.0463609	0.0116769	0.0476955	0.0543779	0.0271715	0	0.0259582	0.151918	0.15413	0.0194245	0.0218069	0.183129	0.0766683	0.0121227	0.0215148	0	0.0762278	0.023022	0.0111113	0.0147906	0.155048	0.0931032	0.0102691
ENSG00000259240	0	0	0	0	0	0	0	0	0	0	0	0	0	0	0.419801	0	0.104641	0	0	0	0.162019	0.0834186	0	0	0.776034	0	0.132223	0	0	0	0.116242	0	0	0	1.05501	0	0	0	0	0	0	0	0	0	0.0950704	0	0	0	0
RP11-26F2.2	0	0	0	0	0	0	0	0	0	0	0	0	0	0	0	0	0	0	0	0	0	0	0	0	0	0	0	0	0	0	0	0	0	0	0.19418	0	0	0	0	0	0	0	0	0	0	0	0	0	0
ENSG00000225868	0.0606728	0.0470947	0	0.0465835	0.102155	0.0202002	0	0	0	0	0	0.0470816	0.14141	0	0	0	0	0	0	0	0	0	0	0	0.0331623	0.0301174	0	0	0.0261584	0	0.0298042	0	0.0189822	0	0	0.0426131	0.0478397	0.0286962	0.0240277	0	0	0.0651182	0	0	0	0	0.359039	0	0
ENSG00000248771	0	3.50476	0	0	0.0233559	0.0138552	0.0198689	1.38581	0	0	0	0	0	0.428649	3.89438	0.284195	0	0.0580178	1.86805	0.0156777	0.0284929	0.0293403	0	0	7.81319	0	0	0	6.90763	0	0	0	0	0.0537861	1.70075	0.014614	0.328129	0	0.0988826	0	0	0	0	0	0.0167193	0	2.29413	0	0.309038
ENSG00000250149	0	0	0	0	0	0	0	0	0	0	0	0	0	0	0	0	0	0	0	0	0	0	0	0	0	0	0	0	0	0	0	0	0	0	0	0	0	0	0	0	0	0	0	0	0	0	0	0	0
KRTAP16-1	0	0	0	0	0	0.0284415	0	0	0	0	0	0	0	0	0	0	0	0	0	0	0	0	0	0	0	0	0	0	0	0	0	0	0.0267266	0	0	0	0	0	0	0	0	0	0	0	0	0	0	0	0
RENBP	2.67827	1.42768	27.1576	2.92346	1.88346	20.2405	1.07845	1.35088	28.9625	1.83558	3.04706	1.20192	2.36904	2.55264	1.43114	7.40426	2.51139	7.82774	2.40176	5.7865	4.06519	2.59356	1.75571	0.885451	11.4465	88.3378	1.8932	2.42506	3.58934	1.70034	3.45555	2.21138	2.22102	0.875822	22.2511	1.38247	8.727	1.37357	25.3534	4.63929	1.0292	2.78793	4.18011	2.12201	1.73719	3.03722	1.00501	5.70297	6.61374
DUSP5P1	0	0.135702	0.0782231	0	0.0654129	1.59098	0	0	0.383471	0.141064	0	0	0	0	0.051692	0	0.103079	0.365604	0	0.175635	0.558601	0.0410868	0	0.0313549	0	0.0867827	0.0325625	0	0	0.0458322	0.17176	0.312007	0	0	0.0866053	0	0	0.0551249	0.507725	0	0	0	0	0	0.0936514	0	0.0363004	0	0.649142
MEG9	1.78444	0.0585251	0.0506036	0	0.028211	0	0	0.382603	0.0661528	0	0	0.0195029	0.0585772	0.0414204	0.0222935	0.0228848	0	0.0350391	0	0.0189367	0.0344159	0.177197	0	0	0	0.0249515	0.0842605	0	0.108358	0.0197663	0	0.0269122	0.12581	0	0.0373508	0.0353039	0	0	0.0199063	0	0	0.0269744	1.98579	0.35566	0.0201948	0	0.031311	0.0423036	0
NDP	0	0	0	0	0	0	0	0.0344536	0	0	0	0.0281	0	0	0	0	0	0	0	0	0	0	0	0	0.0197925	0.0179752	0	0	0.0312246	0	0	0.155101	0	0	0.0807229	0	0.0285524	0	0	0.0952359	0.02817	0	0	0	0	0	0	0	0
FAIM3	1.38519	0.351084	0.284591	0.651137	0.571165	0.376475	0.242946	1.23725	0.297631	0.855366	1.3231	0.39486	0.0988303	0.55907	1.329	0.46333	0.575036	1.14294	1.40996	0.660294	1.23874	0.617859	0.413225	0.197731	1.01978	0.968248	0.742405	0.286451	1.34067	1.08941	1.36089	1.57407	2.40566	0.456713	2.1636	0.496367	2.05067	0.481333	1.47776	2.23042	0.439826	0.773681	1.35054	1.34132	1.0676	1.23969	1.937	0.333078	2.96001
ENSG00000261664	0.162953	0.168647	0.328095	0.250224	0	0.0361687	0	0	0.214455	0	0.178405	0	0.126598	0	0.192724	0.197836	0	0	0	0.0818526	0	0	0	0	0.267198	0.350516	0.36421	0	0	0	0.0533647	0.407141	0.135951	0.0351018	0.645783	0.0762991	0.0428286	0.0513807	3.958	0	0.211275	0.087446	0	0	0	0.0580974	0.0338348	0.0457135	0
WIPF1	2.19046	1.37263	2.42741	2.57019	1.35598	6.19288	1.17438	2.05642	2.28898	0.374332	2.47983	1.28754	1.11943	1.27129	1.97527	0.854797	2.02094	4.02782	2.02701	3.39408	3.38816	1.71881	1.62519	0.438535	3.18207	4.45406	2.48451	1.39492	2.84887	1.3221	2.7669	1.30134	2.08553	3.6588	5.29393	2.12624	3.31084	3.34553	5.30856	3.90437	0.764258	1.42151	4.92752	2.02329	2.21618	3.56493	2.40253	0.759443	5.08533
ENSG00000225882	0	0	0	2.73527	0	0	0	0	0.123382	0	0	0	0	0	0	0.0853655	0	0	0	0	0	0	0	0	0	0	0	0	0	0	0	0	0	0	0	0	0	0	0	0	0	0	0	0.0780407	0	0	0.116797	0	0
ELF4	0.999638	1.1818	1.31084	1.41693	0.707766	1.59752	0.704896	2.42898	1.45726	0.34435	0.782938	0.763778	0.358439	0.697002	1.24139	0.336082	0.680071	5.25299	1.20368	1.32098	1.03191	0.986701	0.537031	0.256513	2.17711	2.27494	1.16869	1.10384	1.00784	0.580569	0.800791	0.675182	0.740975	1.73923	6.4909	0.799303	1.83105	0.232761	24.8124	1.65831	0.323021	0.585958	1.38468	1.07536	0.951519	0.542826	1.25494	0.414176	2.61533
ENSG00000246640	0	0	0.0175871	0	0	0.0174489	0	0	0.0344867	0.0317158	0	0	0	0.0431865	0	0	0	0.0182665	0	0.0197442	0	0	0	0.0140992	0.0143228	0.0130077	0	0.0221275	0.0451912	0	0	0.0280597	0	0	0.0194717	0.0184046	0	0	0.456611	0	0.0203851	0	0.0240751	0	0.0421117	0	0.0979379	0.0220537	0.0389195
PKM	8.78973	16.0558	15.4159	17.8139	14.2126	18.889	11.1294	85.6856	3.79139	4.8599	14.7083	6.09361	11.308	4.19263	25.5952	21.8598	9.84217	16.2328	6.97637	11.0807	12.4711	5.73848	4.16331	3.6209	37.0034	29.1504	8.87515	5.12033	9.68268	7.49757	12.9647	5.29063	4.73431	11.3905	101.578	16.9375	31.3739	23.178	555.278	10.6996	3.13874	5.00778	16.9122	9.77287	7.11873	15.0339	29.6336	30.6325	19.8293
DNM1P33	0	0	0	0	0	0	0	0	0	0	0	0	0	0	0	0	0	0	0	0	0	0	0	0	0.134369	0	0	0	0	0	0	0	0	0	0.182673	0	0	0	0	0	0	0	0	0	0	0	0	0	0
CD177	0.0530796	0	0.142497	0.122261	0	0.141377	0.0253426	0.0252513	0.139712	0.0642431	0.544808	0	0.0618562	0	0.0235414	0	0.0469442	0.166502	0.0407295	0.0199968	0.0363424	1.02914	0.0862103	0.0285591	0	0.0131741	0	0	0.0457694	0.0417456	0.0260742	0	0.0830329	0	0.315533	0	0.0209263	0	1.91288	0	0.020646	0	0.170682	0	0.191927	0.0567733	0.099191	0	0.0985436
ENSG00000251576	0	0	0.0195044	0	0	0.0193512	0	0	0	0.0175867	0	0	0	0	0.515562	0	0	0	0.0668987	0	0	0	0	0.0312725	0.0476527	0	0	0	0.0250589	0.0228559	0	0	0	0	0.0863778	0	0	0	0.0230178	0	0.0678225	0	0.0266997	0	0	0	0.0181025	0	0.0215812
LILRB2	1.24988	0.490791	1.31256	0.880608	0.924301	1.18475	0.533565	0.531642	1.70297	0.533912	1.46097	0.775918	2.31334	1.18746	1.52606	0.227616	0.754279	2.21403	0.688273	2.71443	2.67804	1.39958	0.859773	0.419317	1.96106	1.23356	0.81342	1.1175	1.1665	0.682314	4.10281	0.346401	1.41695	0.722193	1.5734	0.908829	1.04349	0.375555	1.43253	4.78249	0.308852	0.970585	2.05346	1.21179	1.2288	2.42207	1.07167	1.49741	2.67533
ENPP5	4.73225	0.120829	0.0104475	12.0235	8.59676	0.279866	0.445933	0	0	0.0188405	1.3549	0	0	0.0513093	0.0414239	0.0141742	0.15144	0.0651067	0.0119447	0.0234578	0	0.0109751	0.0126414	0.016751	0.82531	2.14041	0.0608867	0	0.107382	0.306067	0.0305871	0.0166687	0.146106	0.905371	6.68573	3.3346	2.29525	0.662623	7.59491	0.0136466	0.0242193	0.0417679	0.100112	0.012958	0.0625404	0.0166499	3.70409	0.458529	0.208079
IGFBP3	25.1215	6.63886	15.2424	73.8737	13.8546	25.9523	19.773	106.785	34.7432	8.58546	56.8634	24.4071	71.09	51.2615	16.4614	94.9223	9.9402	37.9891	119.302	2.64776	14.5953	37.6451	19.6225	23.8062	66.7097	9.29131	103.769	21.1762	28.4858	13.3848	44.9819	122.356	24.0058	39.8446	239.919	11.1881	115.333	20.7826	31.7552	27.5733	47.3994	64.4676	5.46986	24.949	17.222	26.6212	25.1731	24.9796	73.1123
ENSG00000259342	0	0	0	4.47406	1.02202	0	0	0.0866302	0	0	0	0.141309	0.106106	0.0750283	0.0807643	0	0	0.126939	0.0698659	0	0	0	0	0	0	0.85874	0.0508761	0	0.0785112	0	0	0	0	0	0.60891	0	0	0.258384	0.144232	0	0.0708307	0	0	0	0	0	0	0	0
ENSG00000228427	0.274281	0.0709664	0.122722	0	0.102624	0.426153	0.0873029	0.173976	0.36097	0.221311	0.450435	0	0.106544	0.45203	0.243294	0	0.0808591	0.318658	0.280618	0.413322	0.125196	0.193379	0.22274	0	0.149916	0.136151	0.255432	0	0.473013	0.359524	0.179646	0.293699	0.28604	0.17725	0.339681	0.19264	0.648801	0.0864838	0.434484	0.721353	0.42674	0.34344	0.839975	0.0761058	0	0.391157	0.227802	0.384724	0.339473
CD48	3.68981	0.959933	1.51033	1.83676	0.568916	1.03948	0.561416	1.02234	0.800441	0.257645	4.21171	0.849539	0.968661	1.40331	1.76236	1.19991	1.63165	2.04918	2.7224	2.76486	4.16428	0.886214	1.25126	0.4036	2.70379	1.38879	1.41603	1.07852	4.12565	1.80175	2.25074	0.803233	2.96846	0.537163	2.9828	1.4951	3.06922	0.364373	3.14729	7.50025	0.268114	1.28379	4.78694	2.27829	0.993709	3.16594	2.56361	0.904301	5.2694
GZMA	4.6775	3.68835	5.08266	4.6744	1.33343	2.86744	0.638073	1.13026	2.44281	0.808752	12.8636	3.86016	2.33611	6.24044	4.54421	5.20558	12.8045	5.90009	5.98197	6.65707	23.1806	2.46029	4.03971	0.8389	2.8001	6.00739	4.68794	1.75545	10.5634	9.05083	9.11795	1.98756	7.10801	2.49498	5.07561	4.11956	7.96172	1.19394	6.11582	17.9644	0.519821	3.94446	6.34379	5.68597	1.84941	12.4678	9.48093	3.12427	15.4381
ENSG00000259097	0	0	0	0	0	0	0	0	0	0	0	0	0	0	0	0	0	0	0	0	0	0	0	0	0	0	0	0	0	0	0	0	0	0	0	0	0	0	0	0	0	0	0	0	0	0	0	0	0
RP11-541M12.3	0	0	0.184083	0	0	0	0	0	0	0	0	0	0	0	0	0	0	0	0	0	0	0	0	0	0	0	0	0	0	0.215714	0	0	0	0	0	0	0	0	0	0	0	0	0	0	0	0	0	0	0
ENSG00000227531	0	0	0	0	0	0	0	0	0	0.0539893	0	0	0	0	0	0	0	0	0	0	0	0	0	0	0.0487629	0	0	0	0	0	0	0	0	0	0	0	0	0	0	0.0782112	0	0	0	0	0	0	0	0	0
CXCL8	0.904862	1.58598	1.82189	0.403396	0.131056	0.174927	0.362341	9.27584	7.45243	4.62798	2.66042	0.090602	0.136062	0.144316	0.647286	11.3223	1.00679	0.427288	8.08555	0.483845	0.359733	1.41999	0	0.06282	0.159541	1.49239	0.668705	0.22183	11.2254	0.0918255	1.97872	0.156278	6.30119	0.056589	22.8606	13.715	0.736487	2.95437	91.1119	5.34808	0.0454139	0.109647	0.321806	0.461655	1.7356	0.312203	1.83639	0.565006	4.33523
RPS2P25	0	0.266491	0	0	0	0	0	0	0	0	0	0.0888056	0	0	0	0	0	0	0	0.0862275	0.313422	0	0	0.0615744	0	0	0	0	0	0	0	0	0	0	0	0	0	0	0	0	0	0	0	0	0	0	0.142573	0	0
LRRC49	0.0531486	0.051568	0.26307	0.163226	0.178974	0.0663569	0.0951585	0.126421	0.02623	0.0120613	0.0763724	0.056709	0.0309683	0.0492704	0.0530372	0.0483946	0.0940106	0.0463108	0.0662716	0.050057	0.063682	0.079628	0.194225	0.0107236	0.0835182	0.112126	0.107654	0.0224398	0.120301	0.00522498	0.0717974	0.355696	0.0457275	0.0729862	0.385056	0.0653251	0.115244	0.0691282	0.473579	0.122307	0.165383	0.0392169	0.0671409	0.0829539	0.261574	0.142118	0.27313	0.0279561	0.0986718
CTD-2649C14.1	0	0	0	0	0	0	0.0678607	0	0	0	0	0	0	0	0.0630376	0	0	0	0.0545313	0	0	0	0	0.0382368	0	0	0.0397095	0	0	0	0	0	0	0	0	0	0	0	0	0	0.0552843	0	0.0652914	0	0	0	0	0	0
TULP1	0.0224395	0.0174177	0	0	0.100751	0	0	0.02135	0	0	0	0	0	0	0.0199044	0	0	0.015642	0	0.0169073	0	0	0	0	0.0122649	0.0111388	0.0250769	0	0.0386982	0.017648	0.0220458	0	0.0140409	0	0.066696	0	0.0176932	0	0	0	0.0174562	0.0120418	0	0.0186791	0	0.024001	0.0139777	0	0.0333276
CLIC4P2	0	0	0	0	0	0	0	0	0	0	0	0	0	0	0	0	0	0	0	0	0	0	0	0	0.0505991	0	0	0	0	0	0	0	0	0	0	0	0	0	0	0	0	0	0	0	0.0743856	0	0	0	0
ANXA8	0	0.145571	0.0269716	0.0411402	0.0601455	0.490595	0	0.0254908	0.0176296	0	0	0	0	0.0110385	0.0118824	0	0.094779	0.00933787	0.0513948	0	0	0	0	0.014415	0	0.0531963	0.0149702	0	0.0346527	0	0.0131608	0	0.0419103	0.0779112	0.408111	0.0282253	0.0422495	0	1.19893	0.0469741	0	0.115018	0.0492288	0	0	0.014328	0.25033	0.0112739	0.0198957
ITGA3	0.467246	1.40342	1.877	1.95489	0.357248	1.39782	0.737149	2.66737	0.481244	0.922037	1.2344	1.66576	0.710223	1.02673	2.00021	1.1592	1.83861	1.30755	2.05246	1.46434	0.602735	1.65191	0.885368	0.491867	2.49464	1.79835	2.00919	1.05213	2.42322	0.724299	1.74306	1.79102	2.22877	0.809577	5.30352	1.0606	2.22652	1.10176	40.2742	1.66814	0.81125	0.617766	1.25672	0.591874	1.44191	1.60068	3.67821	0.5927	1.97126
SAMD12	0.783725	3.60211	0.29406	0.0284282	0.658051	0.0123275	0.0824978	0.076329	0	0.0112034	0.167217	0.459715	0.00719144	0.300023	0.0273694	0.213525	0.0600354	0.0473188	0.710286	0.013949	0	0.0391577	0.0150343	0.10957	0.0438485	0.689235	0.0206891	0.171961	0.13303	0.0388269	0.00606281	0.0132159	1.96545	0.913242	0.197177	1.06188	0.0291948	0.0758864	0.180846	0.0108198	0.393652	0.0331161	0.351515	0.0102739	0.0198343	0.587445	0.711141	0	0.0824886
NXT1P1	0	0	0	0	0	0	0	0	0	0	0	0	0	0	0	0	0	0	0	0	0	0	0	0	0	0	0	0	0	0	0	0	0	0	0	0	0	0	0	0	0	0	0	0	0.16878	0.224668	0	0	0
ENSG00000273769	0	0	0	0	0	0	0	0	0	0	0	0	0	0	0	0	0	0	0	0	0	0	0	0	0	0	0	0	0	0	0	0	0	0	0	0	0	0	0	0	0	0	0	0	0	0	0.0297027	0	0
ENSG00000232490	0	0	0	0.0441806	0	0.0191583	0	0.0273747	0	0	0	0	0.0335289	0	0	0	0	0	0	0	0	0	0	0	0	0	0.0160766	0	0	0	0	0	0	0	0	0	0	0.027216	0.0455766	0	0	0	0	0	0	0	0	0	0.0213661
ENSG00000223446	0	0	0.187177	0	0	0	0	0	0	0	0	0	0	1.14907	0.247383	0	0	0	0.214001	0.210134	0	0	0	0	0	0	0	0	0	0	0	0	0	0	0	0.195877	0	0	0	0	0	0	0	0	0	0	0	0	0
GIPR	0.196213	0.0543936	0.0752501	0.0645638	0.110122	0.923905	0.026766	0.0400043	0.295117	0.0678514	0.0460326	0.0978812	0.081663	0.0346467	0.0124318	0.0765694	0.0619761	0.0976967	0.215085	0.01056	0.230302	0.217389	0.14796	0.0452447	0.0383019	0.0278281	0.415055	0.0118347	0.0845951	0.132271	0.165232	0.12006	0.122775	0.0452855	0.239527	0.108278	0.154711	0.0132574	7.1599	0.122866	0.0327083	0.0376052	0.154516	0.0466662	0.112615	0.059962	0.0873018	0.0471807	0.135302
OLIG1	0	0	0	0	0.0327208	0	0	0	0	0	0.0239361	0	0	0.0480419	0.258573	0	0	0	0	0	0	0	0	0.21958	0.0318661	0	0	0	0	0	0	0	0	0	0	0	0	0.0827236	0.16162	0.102221	0	0	0.0267818	0	0	0	0.0181582	0.0245331	0
ENSG00000272053	0	0.050021	0	0	0	0	0	0.061314	0.0848105	0	0.370406	0	0.150196	0.0531026	0.0571623	0.0586784	0	0.089843	0.197795	0.0971105	0.17649	0.0908696	0.209332	0	0	0.0959665	0.0720169	0	0.555676	0	0.0633122	0.0690051	0.0403234	0	0.143655	0.181044	0.152437	0.0609585	0.153124	0.39546	0	0.0345822	0.059206	0.0536435	0	0	0.200709	0	0.239279
ENSG00000255202	0	0.397544	0	0	0	0	0	0.097459	0	0	0.0841089	0	0	0.0844069	0.0908598	0	0.271776	0.142806	0	0.0771789	0	0	0	0.0551129	0	0.0508464	0.228942	0	0	0.0805599	0	0	0.576848	0	0.380569	0	0	0	0.0811305	0	0	0	0	0	0.246919	0.10956	0.0638057	0.172413	0
ENSG00000231881	0	0.0320408	0.027704	0	0	0	0	0.078549	0.10865	0.0249801	0	0	0.0481039	0	0	0	0	0	0	0	0	0	0	0	0	0	0	0	0	0	0	0.0884021	0	0	0.0306727	0	0	0	0.0980831	0	0	0	0	0	0	0	0	0	0.0306539
ENSG00000256448	0	0.149772	0	0	0	0	0	0.183586	0	0	0.158438	0	0	0.158999	0.171154	0	0	0	0.148059	0	0	0	0	0	0.210928	0	0	0	0	0	0	0	0	0.124693	0.286754	0	0.152141	0	0.152827	0.169154	0	0	0	0	0	0.206381	0.240384	0	0.143289
PGM2L1	0.383807	0.28039	0.292946	1.57163	0.236525	0.160356	0.855152	0.665904	0.059425	0.218601	0.43874	0.572303	0.12278	0.130228	0.493981	0.383738	0.499181	0.283281	0.583238	0.379909	0.422516	1.06648	0.244458	0.287487	2.22531	0.381037	0.727476	0.368576	0.467221	0.27226	1.37521	1.18459	0.216612	0.914303	2.38221	0.734695	1.78016	0.647805	3.16508	0.488208	0.392243	0.201926	0.352618	0.783061	1.11265	0.289776	1.15788	0.506684	0.547683
NTAN1P3	0	0	0	0	0	0	0	0.0883265	0	0	0	0	0	0	0.0823457	0	0	0	0	0	0	0	0	0	0.0507407	0	0	0	0	0	0	0	0	0	0	0	0	0	0	0	0	0	0	0	0	0	0	0	0
OR8B5P	0	0	0	0	0	0.0485694	0	0	0	0	0	0	0	0	0	0	0	0	0	0	0	0	0	0	0	0	0	0	0	0	0	0	0	0	0	0	0	0	0	0	0	0	0	0	0	0	0	0	0
INPP5J	0.110122	0.427388	0.194008	0.253649	0.123609	0.577454	0.131443	0.694138	0.0362318	0.124952	0.0678174	0.0427269	0.481239	0.0453718	0.280833	0.238145	0.109567	0.124741	0.264062	0.0311148	0.678583	0.0776405	0.0558927	0.0518441	0.917899	1.52375	0.215364	0.0348708	0.0949558	0.0974337	1.70399	1.09074	0.0602927	0.0978513	1.70816	0.251366	0.900858	0.364588	1.15568	0.0965394	0.0107083	0.0221607	0.22764	0.022917	0.33182	0.55948	0.188638	0.625579	0.408889
OR5B2	0	0	0	0	0	0	0	0	0	0	0	0	0	0	0	0	0	0	0	0	0	0	0	0	0	0	0	0	0	0	0	0	0	0	0	0	0	0	0	0	0	0	0	0	0	0	0	0	0
RNF152P1	0	0.170601	0	0	0	0	0	0.104559	0	0	0	0	0	0	0	0	0	0	0	0.0828012	0	0	0	0	0.0600655	0.0545505	0	0	0	0	0	0	0	0	0	0.0771834	0.08665	0	0	0	0	0	0	0	0.0883021	0.117541	0.0684538	0	0.0816085
ENSG00000251291	0	0	0	0	0	0	0	0	0	0	0	0	0	0	0	0	0	0	0	0	0	0	0	0	0	0	0	0	0	0	0	0	0	0	0	0	0	0	0	0	0	0	0	0	0	0	0	0	0
FOXB1	0	0	0.0123231	0	0	0	0	0.0174698	0	0	0	0	0	0	0	0	0	0	0.098624	0	0	0	0	0	0.0100358	0	0	0	0	0	0	0	0	0	0.0136436	0	0	0.0173685	0	0.0160966	0	0.0098533	0	0	0.0737683	0	0.0228748	0	0.0136353
CD200R1	0.254965	0.10555	0.273791	0.0522022	0.190795	0.0679101	0.0649238	0.145552	0.20133	0.0822904	0.223314	0.158281	0.0594247	0.0560263	0.196006	0.0464318	0.0901978	0.36731	0.156514	0.332986	0.395691	0.191745	0.0414107	0.018291	0.157939	0.278438	0.142466	0.0574125	0.278478	0.213891	0.367389	0.345821	0.319076	0.0768914	0.290499	0.262641	0.147427	0.048236	0.296183	0.342727	0.0264459	0.465199	0.43726	0.254686	0.245844	0.745402	0.910568	0.185968	0.353435
GIF	0	0.0213871	0	0	0	0	0	0	0	0	0	0	0	0	0	0.0250887	0	0	0	0	0	0	0	0	0	0	0	0	0	0	0	0	0	0	0	0	0	0	0	0	0	0	0	0	0	0	0.0171632	0	0
ENSG00000231651	0	0	0.55454	0	0.30915	0	0	0	0	0	0.113076	0	0	0	0	0	0	0	0	0	0	0.0970909	0	0	0.0752688	0	0.230842	0	0	0	0	0	0	0.0889926	0.102327	0	0	0	0.109072	0	0	0	0	0	0	0.58917	0	0	0
SIRPG	1.0362	0.229802	0.476875	0.500077	0.0996948	0.275992	0	0.450694	0.116889	0	1.04532	0.137843	0.310509	0.609898	0.78783	0.296533	1.02116	0.722311	0.499781	0.713819	2.31082	0.104366	0.264466	0.143362	0.242727	0.308616	0.215055	0.374993	1.09772	1.69974	0.232691	0.126807	0.40755	0	0.659969	0.228727	0.280124	0.05601	5.27602	1.40152	0	0.1271	1.3056	1.25687	0.0475776	0.664985	1.12494	0.0498322	1.14325
FAM218A	0	0.0236881	0	0	0.239787	0	0.0291411	0	0	0	0.0250587	0	0	0	0.324839	0.0833638	0.566795	0.0425464	0	0	0	0.0430325	0	0.0164199	0.0166803	0	0.0511568	0	0	0.0240013	0	0.0326783	0	0	0.498886	0.0214339	0	0	0	0	0	0.0327537	0.0280378	0	0.0490432	0.0326414	0.114058	0	0
ENSG00000251325	0	0	0	0	0	0	0	0	0	0	0	0	0	0	0.0907198	0	0	0	0	0	0	0	0	0	0	0	0	0	0	0	0	0	0	0	0	0	0	0	0	0	0	0	0	0	0	0	0	0	0
MED15P8	0.243582	0	0	0	1.09366	0	0	0	0	0	0	0.189017	0	0	0	0	0	0	0	0	0	0	0	0	0	0	0	0	0	0	0	0	0	0	0	0.085539	0	0	0	0	0	0	0	0	0	0	0.0758644	0	0
ENSG00000240777	0	0	0	0	0	0	0	0	0	0	0	0	0	0	0	0	0	0	0	0	0	0	0	0	0	0	0	0	0	0	0	0	0	0	0	0	0	0	0	0	0	0	0	0	0	0	0.0747669	0	0
CA12	7.45176	0.0915878	0.0609162	0.0139375	0.407522	0.120876	0.0520021	0.967207	3.52382	0.14281	4.09906	4.69784	18.013	6.98561	37.4695	0	0.0883004	0.68964	11.6657	0.164131	0.161576	0.326362	0.0442251	0.0293011	16.019	92.0107	2.96182	0.260586	0.30523	0.185597	0.0891722	0.0291571	0.829185	0.357796	5.54389	0.529107	18.4928	1.60553	1.0352	0.0397847	0.656653	8.73809	4.37791	0.317328	0.503224	0.262118	16.6278	0.718039	0.107844
RP5-1173I20.1	0	0	0	0	0	0	0	0	0	0	0	0	0	0	0	0	0	0	0	0	0	0	0	0	0	0	0	0	0	0	0	0	0	0	0	0	0	0	0	0	0	0	0	0	0	0	0	0	0
ENSG00000229664	0.138283	0.32201	0	0	0	0	0	0	0	0	0.794829	0	0	0.113949	0	0.377742	0	0	0	0.104192	0	0	0.224596	0	0.151165	0.0686427	0	0.116769	0.238478	0	0	0	0.173054	0	0.411014	0	0	0	0	0	0	0	0	0	0.111114	0.147906	0.172275	0.349137	0.513453
C12orf54	0	0	0	0	0	0.0476017	0	0	0	0.0216306	0	0	0	0	0.0951166	0.0325465	0	0	0	0	0	0	0	0	0.0390733	0	0.0199724	0	0	0	0	0.0382742	0.0447314	0.0230988	0	0	0.0281834	0	0.056621	0.031335	0	0.0383626	0	0.0297538	0.0287208	0.038231	0.066795	0	0
RP11-747H7.1	0	0	0	0	0	0	0	0	0	0	0	0	0	0.0923133	0.0496854	0	0	0	0.0429808	0	0	0	0	0	0	0	0	0	0.0482993	0	0	0	0	0	0	0	0	0	0	0	0	0	0	0	0	0	0	0	0
APOBEC1	0	0	0	0	0	0	0	0	0	0	0	0	0	0	0	0	0	0	0	0	0	0.052641	0	0	0	0	0	0	0	0	0	0	0	0	0	0	0	0	0.295684	0	0	0	0	0	0	0	0	0	0
PTPRC	1.80788	0.603168	1.13352	2.24037	0.801036	0.464632	0.56787	0.958128	0.626124	0.254319	2.42856	0.609153	0.887076	0.503114	2.51798	0.375441	0.848543	1.80191	1.947	3.86545	3.39856	1.31376	0.25757	0.294375	2.66539	2.37342	1.20513	1.01773	1.53838	0.785755	2.85121	0.636799	1.66708	1.11707	3.21702	2.53393	3.38865	0.187514	4.17641	4.8937	0.511976	1.07655	3.06696	2.594	1.33798	1.78951	8.28799	0.34701	4.90501
ENSG00000271893	0	0	0	0	0	0	0	0	0	0	0	0	0	0	0	0	0	0	0	0	0	0	0	0	0	0	0	0	0	0	0	0	0	0	0	0	0	0	0	0	0	0	0	0	0	0	0.164398	0	0
PTGIS	0.0594874	0.517156	0.383278	1.62597	0.267092	0.261434	0.0681648	1.26782	0	0.122398	0.89877	0.692426	1.09531	0.323527	0.327154	0.0108333	0.810214	0.447846	0.346913	0.0896432	0.391005	0.671057	0.347823	0	0.760837	0.620109	1.23651	0.210975	0.820715	0.0374281	0	0.140138	0.439228	0	2.6345	1.54588	0.253287	0.0675253	3.53374	0.250321	0.13883	0.900228	1.48657	0.0990371	0.0764789	0.267233	0.177865	1.14147	0.485935
C17orf50	0	0	0	0.095884	0	0.166315	0	0	0	0	0	0	0	0	0	0	0	0	0	0	0.342022	0.0440243	0	0	0.136518	0.0619915	0.0697811	0	0	0	0	0.534903	0	0	0.0463986	0	0	0	0.0494568	0	0	0	0	0	0	0	0	0	0
ACTBP8	0.119812	0.0464997	0.0804116	0.0919898	0.067243	0.03989	0.114408	0	1.1826	0.0362527	0	0.650814	4.46794	0.0987286	0.0531382	0.0545476	0.158945	0.0417592	0.0459677	0.812468	0	0.126709	0	0.0644642	0.19646	0.0297369	0.0669471	0.0505857	0.154967	2.40284	0	0	0.0749694	0.0774268	0	0.0420747	0.0944704	0.0566672	0.0948963	0.0525173	0.093205	0	0.0550381	1.59575	0.144407	2.62707	8.13489	0.0504169	0.0444869
ENSG00000274737	0	0.299544	0	0.197529	0.14439	0	0	1.71347	0	0	0	0	0.149905	0.105999	0.114103	0	0	0	0	0	0.176148	0	0	0	0	0.0638537	0.143755	0	0	0	0.126379	0	0.0804904	0	0.0955847	0	0	0	0.407539	0	0	0	0	0	0	0.137587	0.0801281	0	0
ENSG00000260123	0	0	0.0746198	0	0	0.0740337	0	0	0	0	0	0.0862768	0	0.0916175	0.0986217	0	0.0983312	0	0.170627	0	0	0.156777	0	0	0	0	0.12425	0	0.0958704	0	0	0	0.0695696	0	0.165232	0	0	0	0	0.194938	0	0.119329	0	0	0	0	0.554052	0	0
FAM171B	0.14811	0.530604	0.412907	0.83975	0.217403	0.1669	0.271979	0.357718	0.119952	0.0758407	0.392913	0.28291	0.1726	0.112658	0.313284	0.186732	0.463503	0.142953	0.288494	0.369123	0.140411	0.46589	0.175791	0.147119	0.815761	0.54292	0.547481	0.250133	0.412608	0.116484	0.358183	0.402589	0.178223	0.434393	1.84554	0.760176	0.979177	0.0107771	0.469237	0.429477	0.407696	0.134506	0.177943	0.218128	0.796447	0.353391	0.220002	0.0383535	0.431491
ENSG00000262202	0.104201	0	0	0	0	0.0693848	0.0995006	0	0	0.0630581	0.171123	0	0	0	0.647002	0	0.0921565	0	0	0	0	0	0	0	0	0.103449	0.058224	0	0	0	0	0.111578	0	0	0	0.0731849	0.164322	0	0	0	0	0	0	0.0867391	0	0	0	0	0.0773807
SAMD12-AS1	0.0754273	1.52223	0.0506228	0	0	0	0	0	0	0	0	0	0	0	0	0	0	0	0	0	0	0	0	0	0	0.26209	0.0421462	0	0	0	0	0	0.330377	0.0487437	0.0560474	0.0529759	0	0	0.0597415	0	0.117354	0	0.138596	0.0627873	0	0.161352	0	0	0
RP11-46B11.2	0.205498	0	0	0	0	0	0	0.195521	0	0	0.337477	0	0	0	0	0	0	0	0.31537	0.309671	0.281401	0	0.333764	0	2.24641	0	0	0	0.354394	0	0	0.220047	0	0	0.305398	0.288661	0.324066	0	0	0	0	0	0	0	0	0	0	0	0
SLC28A3	0	0.0407044	0.00879874	0	0	0.00872963	0	0.0124735	0.0345071	0	0.0107649	0	0	0.010803	0	0	0	0	0	0	0.107714	0	0.0106464	0	0	0.0260308	0.0293017	0	0.045218	0.0103107	0.01288	0	0	0	0.496821	0.0184155	0.0310112	0	0.031151	0	0.0101986	0	0	0	0	0	0	0	0.00973563
ARHGAP42P1	0	0	0	0.0515813	0	0	0	0	0	0	0	0	0	0	0	0	0	0	0	0	0	0	0	0	0	0.0166743	0	0	0	0	0	0	0	0	0	0	0	0	0	0	0	0	0	0	0	0	0	0	0
CD300LF	0.614308	0.0953663	0.494749	0.471655	0.379249	0.286337	0.498608	0.379914	0.404233	0.24164	0.453978	0.405194	0.894854	0.379655	0.844605	0.307648	0.244486	0.706563	1.0606	1.64315	1.13563	0.303179	0.598645	0.247893	1.74599	0.396419	0.37758	0.155619	0.264852	0.531449	1.05618	0.36179	0.422826	0.238192	1.02706	0.453028	0.581248	0.348657	2.33548	1.88489	0.0955772	0.247244	1.26987	1.07386	0.419568	0.821321	0.382657	0.749651	0.752716
SCARA5	0.104765	0.0232341	0.0100447	0	0	0.0199315	0.157204	0.0142398	0	0.262654	0.0368676	0.0116138	0.0174411	0.110995	0.0265511	0.0272554	0.0397094	0	0.0689049	0	0	0.0738635	0.012154	0	0.139065	0.0222876	0.510126	0	0.0516209	0	0.0147039	0	0	0	0.711745	0.0525578	0.0944065	0.0424716	0	0	0	0.248976	0.0275004	0.398667	0.0601291	0.0320158	0.0466134	0.113361	0.188942
ENSG00000249199	0	0	0	0	0	0	0	0	0	0	0	0	0	0	0	0	0	0	0	0	0	0	0	0	0	0	0	0	0	0	0	0	0	0	0	0	0	0	0	0	0	0	0	0	0	0	0	0	0
CD7	2.40264	1.26214	1.20532	1.118	1.85242	24.6605	0.764754	1.59327	2.65099	0.2203	2.23192	0.489648	1.07471	3.39973	1.09789	2.05514	2.51127	1.72558	1.9926	1.59087	13.5259	0.513322	3.13366	2.25901	0.769366	2.27688	14.849	2.45919	2.59492	4.90535	0.929891	0.389809	1.2756	0.752809	1.56892	1.12499	3.0426	2.84666	1.94144	3.80836	0.377591	1.7061	3.29995	2.02021	0.448517	3.40049	2.7816	0.694444	3.74868
PLEK	4.46646	0.65296	1.85505	2.9218	1.64118	1.0136	0.726769	1.27679	2.21418	1.19995	3.22345	1.49206	2.89425	1.1058	3.6776	0.49241	1.04512	2.63877	2.39753	5.67426	5.59507	2.13231	0.927118	0.85134	3.86442	2.38613	1.72349	2.1141	2.2279	1.46496	5.47038	1.37261	2.2308	3.14525	3.85465	2.20855	4.31137	1.02309	5.33023	7.58531	0.841376	2.57958	5.04198	3.13444	1.94734	46.5731	5.67667	2.88244	5.59252
ENSG00000259410	0	0	0	0	0	0	0.15806	0.15749	0	0.10017	0	0	0	0.136398	0	0.15072	0	0	0	0	0	0	0	0	0	0.0821658	0	0	0.285459	0	0	0	0	0	0	0.116256	0	0	0	0.14511	0	0	0.152075	0.275575	0.399011	0	0	0	0
FCGR1C	0	0	0.0528446	0	0.0883811	0.104859	0	0.0749151	0.103624	0	0	0	0	0	0	0	0.139273	0.0548863	0.0604178	0.0593261	0.539101	0	0.0639418	0.0423644	0.172145	0.117254	0.0439961	0	0.067894	0.12385	0	0	0.0985363	0	0	0	0	0.223442	0.623637	0.0690263	0	0	0	0	0	0.168434	0	0	0.175415
MMP25	0.402181	0.374612	0.485861	0.172921	0.306978	0.449908	0.399401	0.12245	0.148202	0.204442	0.700106	0.124836	0.562417	0.172332	0.199777	0.102538	0.327238	0.347636	0.678932	0.399998	0.418555	0.170133	0.235156	0.121179	0.21103	0.327409	0.278659	0.203765	2.7466	0.354261	0.268686	0.206714	1.04688	0.114357	0.310801	0.214677	0.367853	0.18261	1.0066	0.634637	0.0250294	0.0863298	0.709439	0.348176	0.232676	0.619443	0.551148	0.500943	0.752633
ENSG00000237943	0.204654	0.0661892	0.183137	0.15713	0.0574295	0.113561	0.0488555	0.0486794	0.157113	0.0412826	0.364097	0.0397024	0.0794976	0.0983735	0.105894	0.0621159	0.105582	0.190212	0.248641	0.128499	0.326951	0.168337	0.166196	0	0.130502	0.152383	0.0762357	0.115209	0.426466	0.0804771	0.134042	0.0547857	0.544241	0.0771483	0.519576	0.0598905	0.537889	0.0161324	0.769948	0.194362	0.477616	0.0640641	3.2434	0.0425895	0.123333	0.164171	0.265584	0.043059	0.430604
OR5BD1P	0	0	0	0	0	0	0	0	0	0	0	0	0	0	0	0	0	0	0	0	0	0	0	0	0	0	0	0	0	0	0	0	0	0	0	0	0	0	0	0	0	0	0	0	0	0	0	0	0
CSDC2	0	0.126822	0.0274142	0	0.0687741	0.0815966	0	0	0	0	0	0.0158484	0.0476007	0.0841472	0.0543481	0.0557896	0	0.0711833	0.282086	0.0461649	0	0.086396	0	0.0109887	0.0334888	0.040552	0.0684714	0	0.0704426	0.0481872	0.0601953	0.0874772	0.0383382	0	0.242815	0.10041	0.0644143	0.0965958	0.161762	0.0716174	4.30561	0.0328797	0	0.0680035	0.0328212	0	0.0127219	0.0859414	0.197166
ENSG00000203601	0	0	0.039458	0	0	0.039148	0	0	0	0	0	0	0	0	0	0	0	0	0	0.0442975	0	0	0	0	0	0.0291838	0	0	0	0	0	0.0629542	0	0	0	0	0	0	0	0	0.0457357	0	0	0	0	0	0.0366219	0	0
ENSG00000258955	0	0.0755449	0.0653197	0	0	0.0648066	0	0	0.128086	0	0.559411	0	0	0	0.0863301	0	0.860758	0.0678433	0	0.733313	0	0	0	0	0.0531959	0.0483116	0.0543822	0	0	0	0	0	0	0	0	0	0	0.184127	0	0	0	0	0	0	0.078203	0	0	0	0
HAVCR2	0.959695	0.501131	1.48728	0.964587	0.900958	1.19674	0.716462	0.763685	0.849665	0.422377	1.69067	0.446829	1.44373	0.733301	1.5942	0.333653	0.802469	1.70286	1.55314	6.74451	3.08231	0.738136	0.538463	0.497581	2.56551	1.09135	1.03349	0.780913	1.26386	1.44093	1.95429	0.504477	0.807951	1.02613	2.77467	0.845609	0.660398	1.41948	10.5173	2.35571	1.15379	0.945738	1.36264	1.40892	0.813197	2.25825	2.30425	1.63004	2.5786
NYX	0	0.0517286	0	0	0	0	0.0212121	0	0	0	0	0	0	0	0	0	0	0	0	0	0	0	0	0	0	0	0	0	0.0383097	0	0	0	0	0.0143556	0	0	0	0	0	0	0.034562	0	0.020409	0	0	0	0	0	0.0164965
AC139085.2	0	0	0	0	0	0.485694	0	0	0	0	0	0	0	0	0.323501	0	0	0.254226	0	0	0	0	0	0	0	0	0	0	0	0	0	0	0	0	0.270998	0	0.287564	0	0	0.319721	0.283712	0	0	0	0	0	0	0.306934	0
TRIM58	0.102909	0	0	0.126418	0.161717	0.0274097	0.0196533	0.117495	0	0	0.0507001	0.0319425	0	0.0169599	0	0.0187407	0	0.0430411	0	0.0775379	0	0.0290219	0	0	0.0112495	0.0102166	0.0115004	0.0868976	0.0177472	0	0	0.0440777	0.0128785	0	0.0611742	0.0289109	0.0486852	0	0.0489047	0.0180431	0	0.0331346	0.0189092	0.0171327	0.0165378	0	0.102564	0	0.0305684
ENSG00000267432	0	0	0.00810259	0.0185385	0	0.0241168	0	0	0	0	0	0	0	0	0.0107088	0	0	0.0252469	0	0	0.0165319	0.00851179	0.0098041	0	0.0131974	0.00599281	0.00674585	0	0.0104101	0.00949487	0	0	0	0	0.0269125	0.0254377	0.0095192	0	0.0191243	0	0	0	0	0	0	0	0.00752021	0	0.00896535
RNASEH1P2	0	0	0.11278	0	0.0943105	0	0.0802302	0	0	0	0	0	0	0	0	0	0	0	0	0	0	0	0	0	0	0.0417069	0.0469477	0	0	0	0	0	0	0	0	0	0	0.158955	0	0	0	0	0	0.0699403	0.135024	0	0.0523369	0	0
TIFAB	0.212923	0.00869857	0.0601696	0.0516249	0.012579	0.0447727	0	0.0746368	0.073742	0.0067817	0.0828167	0.0347846	0.0130595	0.0277034	0.0198809	0.0102041	0.00991115	0.0546824	0.0429953	0.00844368	0.122765	0.0474062	0.0546037	0	0.0367512	0.0166884	0.00626181	0.0851664	0	0.0528815	0.0330297	0.0119999	0.0140243	0.014484	0.0915986	0.0314832	0.0971978	0.0106006	0.017752	0.363498	0	0.00601379	0.288283	0.0746281	0.0450232	0.13185	0.0767867	0.0943136	0.0748985
ENSG00000272668	0.0906776	0.0703848	0.91287	0	0.101783	0.54342	0	0.0862752	0.238674	0.109749	0.0744571	0	0.105671	0.149442	0.0804333	0.0825666	0	0.379255	0.0695796	0	0.37251	0.319657	0.662741	0.0487885	0.0495623	0.405104	1.06402	0	0.234568	0.142631	0.0890869	0.388389	0.340435	0.117198	0.875932	0.127374	0.0714981	0	0.430923	0.158987	0	0.145982	0.083309	0.075482	0.0728613	0.193975	0.395386	0	0
RAD1P2	0	0	0	0	0	0	0	0	0	0	0	0	0	0	0	0	0	0	0	0	0	0	0	0	0	0	0	0	0	0	0	0	0	0	0	0	0	0	0	0	0	0	0	0	0	0	0	0	0
ENSG00000236892	0.183613	0	0	0	0	0	0	0	0	0	0	0	0.106986	0	0	0	0.0811946	0	0	0	0	0	0	0	0	0	0	0	0	0.0722031	0	0	0	0	0	0	0	0	0	0	0	0	0	0	0	0	0	0	0
ENSG00000232518	0	0.0948833	0	0	0.0686052	0	0	0	0	0	0	0	0	0	0.0542147	0	0	0	0	0	0.0836947	0	0	0.0328851	0	0	0.0341516	0	0.158107	0	0	0.0654468	0	0.0394976	0	0	0.0481921	0.0578151	0	0	0	0	0.0561531	0	0	0	0.0380719	0	0.0907763
ENSG00000237181	0.54481	0.775291	0.853177	0.418296	0.203845	0.846476	0.780352	3.8013	0.597502	0.219798	1.2675	0.422768	0.95234	0.374115	0.48326	0.413398	0.80306	0.949436	0.766422	0.684158	1.61642	0.640189	0.516171	0.293131	0.595561	0.631024	1.97874	0.306697	1.64422	0.714129	0.624461	0.680611	0.909069	0.938866	1.07954	0.191322	0.143192	0.0858923	0.503431	1.35324	0.141274	0.243637	1.50161	0.529097	0.218883	1.35969	0.678733	0.382093	2.09034
KB-1269D1.8	0.105526	0.0819104	0	0	0	0	0	0.100403	0	0	0	0	0	0	0	0	0	0.14712	0	0	0	0	0	0	0	0	0.0589645	0.089108	0	0	0	0	0	0	0.156826	0	0	0.0998207	0.250744	0	0	0	0	0	0	0	0	0	0.15673
VWDE	0.0204549	0.0238159	0.0068641	0	0	0	0	0	0	0.00618921	0.932171	0	0	0	0	0	0	0	0	0	0	0.0144215	0	0	0	0	0.00571474	0	0.0176378	0	0	0.043806	0.0127991	0	0.0379982	0.00718317	0	0.0193489	0.113408	0.00896597	0	0	0.0375853	0	0	0	0.025483	0.00860738	0
HLA-DQB1	16.77	2.39538	6.4224	15.1515	6.63923	5.74107	5.90651	5.84659	9.40524	8.44478	9.34679	9.52632	5.31553	7.95229	4.37016	3.57407	23.989	9.86899	7.00007	25.8626	27.4864	10.4303	5.36392	2.02452	40.2597	6.26854	4.87054	6.43466	9.82699	10.283	20.8507	6.55098	20.1991	2.44911	10.4095	8.44157	5.70964	3.30324	32.1181	84.4953	2.5165	8.38195	17.3347	14.9061	4.42641	54.1728	4.87318	3.51985	10.7649
GPR18	0.243518	0.0810089	0.23348	0.267098	0.546684	0.138988	0.132876	0.0661986	0.0915669	0.0631572	0.285653	0.215963	0.0405404	0.0859995	0.277722	0.0316765	0.21537	0.291001	0.186858	0.262117	0.905113	0.220744	0.0565021	0.0187176	0.190145	0.604401	0.252701	0.616891	0.299972	0.24624	0.273424	0.0745024	0.239446	0.224814	0.2585	0.1466	0.329161	0.164537	0.110215	0.548954	0.135313	0.168017	0.447459	0.0868755	0.111812	0.223255	0.346718	0.0878332	0.516683
CPVL	43.7406	1.24948	19.0596	5.06572	1.80686	1.86585	2.77059	2.51479	63.293	2.97051	5.27076	1.72719	5.53501	2.55465	13.7321	1.03144	1.3885	10.0435	5.77944	8.08576	49.0928	5.12814	1.71069	6.78978	12.9151	53.2996	5.58551	1.1579	4.57534	4.14184	8.92267	5.89456	6.34188	21.7811	4.6959	7.25801	3.40031	2.36862	1.92032	10.5228	1.02034	3.66861	30.6554	4.11915	6.16381	6.9082	15.969	6.60643	5.07673
ENSG00000272755	0	0	0	0	0	0	0.11218	0	0	0	0	0	0	0	0	0.106971	0	0	0	0	0	0	0	0	0	0.116632	0	0	0	0	0	0	0.0735099	0	0	0	0.0926311	0	0.186098	0.205979	0	0	0	0	0	0.125655	0.365895	0.0988707	0.0872416
STMN2	0	1.52689	0.0188603	0.129456	0.0315433	0.299395	0.053668	0.58822	0	0	0	0	0	0.046313	0	0.025588	0.869869	0	0.0431264	0	0.115443	0	0	0.0151199	0.675826	0	0.0314045	0.0711883	4.84629	0	0	0	0.281342	0	3.1322	0.019737	0	0	2.20351	0.0985421	0	0.0150803	0	0	0	0.0601143	0	0	2.94247
ENSG00000256072	0	0	0	0	0	0	0	0	0	0	0	0	0	0	0	0	0	0	0	0	0	0.0894796	0	0	0	0	0	0	0	0	0	0	0.238239	0	0	0.0891372	0	0	0	0	0	0	0	0	0	0	0	0	0.0942476
CTD-2336H13.1	0	0	0	0	0	0	0	0	0	0	0	0.0776882	0	0	0	0	0	0	0	0	0	0	0	0	0	0	0	0	0	0	0	0	0	0.0646975	0	0	0	0	0	0	0	0	0	0	0	0	0	0	0
NF1P8	0.681478	0.0705293	0	0	1.42789	0.030252	0	0	0	0	0	0	0	0	0	0	0	0	0	0	0	0	0	0	0	0	0	0	0	0	0	0	0	0	0	0	0	0	0.035984	0	0	0	0	0	0	0	0.0282999	0	0
ENSG00000233515	0	0.794168	0	0	1.57911	0	0	0	0.168314	0	0	0.793946	0	0	0	0	0	0	0	0	0	0	0.519296	0	0.0699029	0	0	0	0	0.704084	0	0	0	0	0	0	0	0	0	0	0	0	0	0.10646	0	0	0	0	0
LHX1	0	0	0	0	0	0.00905329	0	0.012936	0	0.00822778	0	0	0	0	0	0	0	0.0094775	0	0	0	0	0	0	0	0	0	0	0	0.0106929	0	0	0	0	0	0	0	0	0	0	0	0	0.0124912	0	0.0109247	0	0	0	0
ENSG00000254927	0	0	0	0	0	0	0	0	0	0	0	0	0	0	0	0.117129	0	0	0	0	0	0	0	0	0	0	0	0	0	0	0	0	0	0	0	0	0	0	0	0	0	0	0	0	0	0	0	0	0
SPATA20P1	0	0	0	0	0	0	0	0	0	0	0.124435	0	0	0	0	0	0	0	0	0	0	0	0	0	0	0	0	0	0	0	0	0	0	0	0	0	0	0	0	0	0	0	0	0.126148	0	0	0	0	0
KCNS1	0	0	0.02945	0.920871	0.0656723	0.0194791	0	0	0.0192496	0	0	0	0	0.0241056	1.28445	0	0	0	0.022447	0.0220414	0	0.0103124	0	0.00786981	0.51965	0.00726057	0	0	0.100898	0	0	0.0313245	0	0.00945228	0.0760802	1.33549	0.0345989	0.318225	0	0	0.022757	0.0156984	0.0671906	0.0121756	0	0	0	0	0
ENSG00000197301	0.0220043	0.00853997	0	0	0	0.00732606	0	0.041872	0	0	0	0	0.0256427	0.00906608	0	0	0	0.0153387	0	0	0	0	0	0	0	0	0.0184429	0	0	0	0	0	0	0	0.00817532	0.0077273	0.00867505	0.0104073	0.0174283	0	0	0	0.0303243	0	0.00884046	0	0.00685333	0	0
ENSG00000263198	0	0	0	0	0	0	0	0	0	0	0	0	0	0	0	0	0	0	0	0	0	0	0	0	0	0	0	0	0	0	0	0	0	0	0	0	0	0	0	0	0	0	0	0	0	0	0.0363004	0	0
RP11-29B11.5	0	0	0	0	0	0	0	0	0	0	0	0	0	0	0	0	0	0	0	0	0	0	0	0	0	0	0	0	0	0	0.139939	0	0	0	0	0	0	0	0	0	0	0	0	0	0	0	0	0	0
RP11-356M20.1	0.910394	6.55263	1.55529	0.381265	0.185799	4.79456	0.632238	0.629959	0	0	2.03875	0.0642235	0.192896	0.272796	2.71628	1.80864	1.02475	0.230769	0.952598	0.810667	0	0.116703	0.0672107	0	1.67375	0.821658	0	0	0.14273	0.325454	0	0.177245	0.725016	0.855749	2.82893	1.51133	1.10938	0.156577	3.14649	0	1.9315	0	7.75584	0.0688938	0.266007	3.45238	2.52613	0.139307	3.62618
ENSG00000228538	0	0	0	0	0	0	0	0	0	0	0	0	0	0	0	0	0	0	0	0	0	0	0	0	0	0	0	0	0	0	0	0	0	0	0	0	0	0	0	0	0	0	0	0	0	0	0	0	0
PRAM1	0.335143	0.123225	0.272284	0.0812581	0.415788	0.317127	0.101061	0.134262	0.255355	0.106745	0.260709	0.109503	0.102779	0.450589	0.438097	0.208797	0.218403	0.418058	0.148885	0.744265	0.458931	0.385526	0.386761	0.0664343	0.269952	0.19263	0.246404	0.134053	0.471505	0.124854	0.467902	0.415534	0.298005	0.193783	0.327675	0.185831	0.319889	0.283652	1.95593	0.742248	0.123497	0.549014	0.486172	0.264297	0.240948	0.471665	0.263701	0.178141	0.537059
ENSG00000250095	0	0	0	0	0	0	0	0	0	0	0	0	0	0	0	0	0	0	0	0	0	0	0	0	0	0	0	0	0	0	0	0	0	0	0.0579574	0	0	0	0	0	0	0	0	0	0	0.0834254	0.0971707	0	0
ERMN	0.0755474	0.0469125	0.0101407	0	0.03392	0.0503052	0.0144279	0.0718796	0.019885	0	0.0124067	0.0234497	0.0880391	0.0373519	0.026805	0	0	0.0315974	0.0231879	0.0113845	0.103451	0.0319584	0.0858914	0	0.016517	0.0450013	0.0590987	0.0127587	0.065143	0.0475327	0	0	0.075635	0	0.0449094	0.0106121	0.0238273	0.0142926	0.0598367	0.0927211	0	0.0162166	0.0277634	0.0754648	0.0242816	0.0808047	0.0658827	0	0.0785433
ENSG00000235659	0	0	0	0	0	0	0	0	0	0	0	0	0	0	0	0	0	0	0	0	0	0	0	0	0	0.0750535	0	0	0	0	0	0	0.0946084	0	0	0	0	0	0	0	0	0	0	0	0	0	0.659278	0	0
ENSG00000236355	0	0	0	0	0	0	0	0	0	0.10042	0	0	0	0	0	0	0	0	0	0	0	0	0	0	0	0	0	0	0	0	0	0	0	0	0	0	0	0	0	0	0	0	0	0	0	0	0	0	0
ENSG00000250280	0	0.0149036	0	0	0	0	0.0183344	0	0	0	0	0	0	0	0	0	0	0	0	0	0	0	0	0	0	0	0	0	0.0165562	0	0	0	0	0	0	0	0	0.0181623	0	0.0168323	0	0	0	0	0	0	0	0	0
SLAMF1	0.544193	0.132757	0.19827	0.382009	0.122168	0.176006	0.0742351	0.103554	0.347864	0.12232	0.86816	0.0965233	0.308028	0.102498	0.220669	0.226522	0.178765	0.520244	0.50109	0.421745	0.553573	0.0767357	0.214652	0.0501942	0.297443	0.424494	0.356204	0.210069	1.04575	0.379079	0.397166	0.0166492	0.515637	0.0401916	0.577673	0.34945	0.551686	0.147077	0.344819	0.995036	0.0120955	0.333752	0.871379	0.116485	0.124934	0.565432	0.765131	0.117769	0.83134
NCR2	0.0544512	0	0	0	0.06112	0	0	0	0	0	0	0	0	0	0	0	0	0	0.041782	0	0	0	0	0	0	0	0	0	0	0	0	0	0	0	0	0	0	0	0.129383	0	0	0	0.0500264	0	0	0	0	0	0
ENSG00000254261	0	0	0	0	0	0	0	0	0	0	0	0	0	0	0	0	0	0	0	0	0	0	0	0	0	0	0	0	0	0	0	0	0	0	0	0	0	0	0	0	0	0	0	0	0	0	0	0	0
CHD5	0	0.0208379	0	0	0	0.0223449	0.00640868	0.536389	0	0.00406148	0	0	0	0.0110608	0	0.0122222	0	0.0140351	0.0154496	0	0.0183807	0.0141955	0.00545025	0.0180552	0.00366831	0	0.0150005	0	0.0173614	0	0	0	0	0.00433715	0.0548573	0.00471373	0.0211675	0.00634856	0.451837	0	0	0.00360158	0.00616605	0	0.00539277	0.0143569	0.0083612	0.0112966	0.00498398
HOXB6	2.0392	0.494639	0.376366	0.97854	0.286119	0.594061	0.292082	0.436545	0.268371	0.154255	0.753492	0.534061	0.0297047	0.504107	0.316544	0.789139	0.405786	0.479749	0.312948	0.345705	0.20943	0.557117	0.372601	0.0960032	0.98919	0.404897	0.854578	0.25829	1.27481	0.14033	0.425729	0.600482	0.334944	0.247088	0.643985	0.304347	1.06522	1.49493	0.302837	0.670382	0.832832	0.300934	0.210768	0.530461	0.716861	0.436221	0.333436	0.0858094	0.4543
AC083899.1	0	0	0	0	0	0.0642415	0	0	0	0	0	0	0	0	0	0	0	0	0	0	0	0	0	0	0	0	0	0	0	0	0	0	0	0	0.0358443	0	0	0	0	0	0	0	0	0	0	0	0.0300481	0	0
C4orf51	0	0	0	0	0	0	0	0	0	0	0	0	0.0746633	0	0	0	0	0.0446614	0	0	0	0	0	0	0.0350189	0.0318036	0	0	0	0.0503888	0	0	0	0	0	0	0.0505179	0	0	0	0	0	0	0	0	0	0.0798188	0.0539208	0
FNDC7	0	0	0.0133698	0	0	0.0132647	0	0	0	0	0.0163573	0	0	0	0	0	0	0.0138863	0.0152858	0	0	0.014045	0.0161774	0	0	0.0098885	0	0	0	0	0	0	0.0373947	0	0.0148024	0.0139912	0.0157073	0	0.0157781	0.0349275	0.0309937	0	0	0	0	0	0.0124088	0	0
MILR1	0.840665	0.59579	0.809518	0.841889	0.57438	0.730145	0.523529	0.660746	0.769646	0.619331	1.23051	0.311993	0.851885	0.572256	0.810533	0.199688	0.743494	0.662444	0.476789	2.69888	1.30132	0.386546	0.771738	0.334319	1.01886	1.16118	0.653545	0.679007	0.977023	0.603667	2.2623	0.352245	0.663248	0.472406	2.22708	0.693121	0.893411	0.31117	3.38711	1.82642	0.568674	0.686502	1.07458	0.395532	1.08666	1.17283	0.523657	0.922829	2.22572
ENSG00000277851	0	0	0	0	0	0	0.158455	0.0789418	0.32758	0.05021	0.0681282	0	0.0966889	0.136739	0	0	0.146759	0	0.0636653	0.12503	0.227231	0.292486	0	0	0.0453495	0.123557	0.0463609	0	0	0.195761	0	0	0	0	0.0616521	0.0582735	0	0	0.328579	0.145473	0	0	0	0.069066	0	0.266231	0.258413	0.0698274	0.0616144
IL4I1	1.81284	0.38194	0.782154	0.516981	0.406974	0.55183	0.148377	0.468168	0.715743	0.48584	0.446568	0.221061	0.754498	0.832279	0.804019	0.589532	0.526799	1.04706	0.675652	2.04887	3.61726	0.401698	0.126187	0.431958	0.863463	0.488507	0.419653	0.787266	1.09422	1.03876	0.737861	0.305044	0.550965	0.284512	2.4632	0.163702	1.14352	0.783922	3.99986	2.24765	0.0402931	0.291851	1.28484	0.258694	0.270522	1.3019	1.00018	0.784639	1.36547
PLAUR	0.923337	0.439269	0.899556	1.02908	0.768957	0.872658	1.12344	0.878509	0.254793	0.522716	0.758169	0.404477	1.2322	0.601321	0.607662	0.786504	1.00101	0.747449	1.26845	2.7828	2.18207	0.650991	0.592606	0.641026	2.42569	0.694897	1.2815	0.855133	1.27131	1.1244	1.38997	0.797344	0.410019	1.43399	5.58839	0.826314	1.52653	1.08472	13.9187	1.48835	0.289632	0.231764	0.766211	0.706621	0.885517	1.30617	1.15031	0.914948	1.37136
CEACAM4	0.291977	0.0755449	0.0653197	0	0	0.162017	0.0929353	0.277801	0.0640431	0.117795	0.0799158	0.113286	0.226836	0.400995	0.17266	0.13293	0	0.101765	0.0746807	0.256659	0.266547	0.0343093	0.276628	0	0.13299	0.120779	0.135956	0.0821832	0.0839217	0.114816	0.239045	0.156324	0.213146	0.157238	0.289277	0.17089	0.0767399	0.0460317	0.192715	1.23716	0	0.156685	0.134125	0.324063	0.078203	0.0520491	0.151562	0.163818	0.397512
AGBL1	0	0	0	0	0	0	0	0	0	0	0	0	0	0	0	0	0	0	0	0	0	0	0	0	0	0	0	0	0	0	0	0	0	0	0	0	0	0	0	0	0	0	0	0	0	0	0	0	0
ENSG00000255801	0	0	0	0	0	0	0	0	0	0	0	0	0	0	0	0	0	0	0	0	0	0	0	0	0	0	0	0	0	0	0	0	0	0	0	0	0	0	0	0	0	0	0	0	0	0	0	0	0
DEFB118	0	0	0	0	0	0	0	0	0	0	0	0	0	0	0	0.0521924	0	0	0	0	0	0	0	0	0	0	0	0	0	0	0.056314	0	0	0	0	0	0	0	0	0	0	0	0	0	0	0	0	0	0
KRT23	27.0353	1.24277	11.5745	0.0351222	0	0.0456907	0.131045	91.5747	0.210711	19.7103	0.300497	0	22.2564	0.0753903	0.0202885	167.446	1.29464	5.0861	26.7298	0.603176	0.689054	0	0.130021	12.9463	0.0125016	0.0227074	0.33229	0.154511	8.55956	0	0.0674138	0	69.0119	0.133029	26.2075	1.76708	17.2952	0.0432717	2.86232	0.220565	0	0	27.297	0	0.036757	0.391427	0.0569898	0.769978	0.0509561
CMTM2	0.0576681	0.17905	0	0.0885532	0.0647309	0.115199	0.0550668	0.109737	0	0.0348984	0	0.04475	0.20161	0.0475201	0.255765	0.0525098	0.204009	0	0.0442504	0.0434509	0.0789682	0.162634	0.187326	0.031028	0.12608	0.0858779	0.257784	0.0973917	0.348082	0.0453543	0.0566565	0.185253	0.144337	0.111801	0.471363	0.0810057	0.0454705	0.1091	0.182702	0.353887	0	0	0.0529819	0.144013	0.18535	0	0.0718438	0	0
GPNMB	5.42732	4.7231	10.2469	4.02154	6.99269	3.76233	4.69298	4.60185	2.992	4.1881	21.0653	2.1101	6.18186	2.24991	8.59037	0.710328	5.88417	4.44358	11.3392	43.7814	13.5972	0.88787	2.5431	3.83155	10.5866	5.53751	7.52235	2.97372	2.87326	1.64777	4.59854	6.62303	1.51321	4.76045	20.5618	6.14435	3.76971	7.92747	23.0027	9.37904	3.13836	1.68051	14.9486	9.18406	2.13123	7.83139	2.7976	6.6404	14.0277
TMEM200A	0.0216314	0.0839525	0.130661	0.0664329	0.0607017	0.158442	0	0.226393	0.0284682	0.058907	0.133215	0.083929	0.302498	0.0623871	0.134313	0.0295448	0.133918	0.113091	0.0580945	0.317821	0.370264	0.0838807	0.0526997	0.0290966	0.0945859	0.0805324	0.271955	0.0821966	0.289111	0.034025	0.116886	0.08107	0.0473736	0.0838738	2.92539	0.0911562	0.127921	0.204619	0.522556	0.17067	0.0757243	0.0290204	0.178863	0.0900323	0.252029	0.0578418	0.377283	0	0.289147
ENSG00000226900	1.57041	0.0812644	0.14053	0	0	0	0	0	0	0	0	0	0	0	0.0928662	0.476647	0	0	0	0.0788832	0	0	0	0.0563299	0.17167	0.0519692	1.63799	0	0.812479	0	0	0.112106	0.0655096	0	0.0777945	0.220594	2.1463	0	0.165844	0	0.0814441	0	0.0961865	0	0.0841238	0	0	0	0
ENSG00000225030	0	0	0	0	0	0	0	0	0	0	0	0	0.326376	0	0	0	0	0	0	0	0	0	0	0	0	0	0	0	0.241496	0	0	0	0	0	0	0	0	0	0	0	0	0	0	0	0	0	0	0.235704	0
ENSG00000236091	0	0	0	0	0	0	0	0	0.1818	0	0	0	0	0	0	0	0	0.0481469	0	0	0	0	0	0	0	0	0	0	0	0	0.0678581	0	0	0.0446352	0	0	0.0544605	0	0	0	0	0	0	0	0	0	0	0	0
CYLC2	0	0	0	0	0	0.0194192	0	0	0	0	0	0	0	0	0	0	0	0	0	0	0	0	0	0	0	0	0	0	0	0	0	0	0	0	0	0	0	0	0	0	0	0	0	0	0	0	0	0	0.0216571
ENSG00000281041	0	0	0	0	0	0	0	0	0	0	0	0	0	0	0	0.039658	0	0	0	0	0	0	0	0	0	0	0.0243364	0	0	0	0	0	0	0	0.550177	0	0.0686832	0	0	0	0	0	0	0	0	0	0.02713	0	0
PDP1	0.414628	0.349424	1.16081	2.56494	2.69937	2.00363	1.4932	1.47655	0.670401	0.0716902	2.35403	0.257398	0.23469	0.273332	1.11386	1.30521	1.37251	4.02161	1.00901	0.312407	0.486663	0.726648	0.230889	0.0701133	2.36986	1.48777	1.31065	0.440149	1.67526	0.624235	0.62849	0.329816	2.46841	0.191391	5.26403	0.990119	2.72752	0.806832	4.95419	0.768516	2.82	0.642082	1.15369	2.52449	1.46591	0.367456	0.951927	1.03688	3.14945
ENSG00000257663	0	0.0796316	0	0	0	0	0	0.195219	0	0	0	0	0	0	0	0	0.181464	0	0	0	0	0	0	0	0	0	0	0	0	0	0	0	0.0641933	0.0662974	0.0762314	0	0	0	0	0	0	0	0	0	0	0	0	0	0
C17orf102	0	0	0	0	0	0	0	0	0	0	0	0	0	0	0	0	0	0	0	0	0	0	0	0	0	0.0082433	0.0278374	0	0	0	0	0	0	0	0	0	0	0	0	0	0.0129186	0	0	0	0	0	0	0	0
LXN	2.51558	2.77477	3.22855	4.94714	1.73383	2.05709	2.78139	2.14151	0.813143	0.534149	2.10183	2.02056	0.874315	0.800069	0.626353	1.40649	2.88835	1.87661	1.18526	1.3301	2.11518	3.57829	2.32958	0.569891	3.81129	1.8183	5.32657	2.236	4.07188	1.07599	4.29252	1.70127	1.38075	1.05525	9.54296	1.61182	6.36808	0.667949	9.75249	3.3273	1.40762	0.828915	1.50023	1.8736	4.18449	2.2658	1.51199	1.11427	3.11349
AC013437.6	0	0	0	0	0	0	0	0	0	0	0	0	0	0	0	0	0	0	0	0	0	0	0	0	0	0	0	0	0	0	0	0	0	0	0	0	0	0	0	0	0	0	0	0	0	0	0	0	0
PIWIL4	0.17475	0.237375	0.117283	0.313064	1.04615	0.950289	0.736999	4.21208	0.0383303	0.370131	0.119576	0.0791028	0.0848521	0.119999	0.206677	0.371278	0.309103	0.598921	0.257008	0.14264	0.478591	0.25668	0.0591301	0.0235058	0.111434	0.267462	0.203426	0.0983746	2.37327	0.034359	0.100149	0.0467805	0.382709	0.244681	4.46904	0.808004	0.470777	0.785185	2.75666	0.191496	0.271885	0.0547033	0.374617	0.0484886	0.280831	0.451702	0.0362844	0.710836	1.5897
NCF4	2.9056	1.58168	3.1404	1.91217	1.31305	2.36192	1.33322	1.75925	5.95939	1.48432	3.28441	1.43482	5.18899	2.45649	1.57318	1.34003	2.76999	3.31433	2.80866	5.62954	4.90892	1.62289	2.26766	0.832428	3.54752	3.87739	2.8254	2.29421	8.26469	4.03615	3.11414	0.969759	3.40009	1.07297	4.12183	1.8022	2.20177	1.24932	6.66497	6.08687	0.616456	2.49074	5.2003	1.31928	4.6391	6.13487	2.49158	6.28804	8.09849
ENSG00000249639	0	0	0	0	0.147828	0	0	1.50365	0	0.0796984	0.21628	0.102197	0	0	0	0	0	0	0	0	0	0	0.10695	0	0	0	0	0	0	0	0	0	0	0	0.195721	0	0	0	0	0	0	0	0	0.109629	0	0	0	0	0
DUSP2	2.71413	0.400013	1.22207	0.369292	0.886967	0.915075	0.426483	5.68773	2.12509	0.249491	1.86189	1.5996	0.920847	2.29314	0.792343	1.72057	0.516544	3.06545	5.27249	0.880127	12.9376	0.678229	2.45521	0.369702	1.27692	0.511622	1.03664	1.3345	2.34034	4.51236	6.91945	0.993288	1.6768	0.843679	2.27207	0.941062	4.11758	0.162493	9.38796	4.00577	0.106906	1.08776	2.17794	5.63396	0.496905	1.10241	1.13424	0.578281	2.65337
ENSG00000244649	0	0	0	0	0	0	0	0	0	0	0	0	0.0200495	0.0567088	0.0457832	0.0156658	0	0.011993	0	0.0129632	0	0	0	0.00925692	0.0188075	0.0085403	0	0	0.0296706	0	0	0	0.0107654	0.0222366	0.115058	0	0.0406972	0.0976473	0	0.0754136	0	0	0	0.0143216	0	0	0.0428679	0	0.0127764
IL26	0.12349	0	0	0	0	0	0	0	0	0	0.1014	0	0.0719546	0	0	0	0	0.129123	0.0473788	0	0	0	0	0	0.0674969	0.0306498	0	0	0.0532415	0.0971215	0	0	0	0	0.183523	0	0.0486852	0	0	0	0	0	0	0	0	0.0660419	0.153846	0	0.0917051
TCN1	0	0	0	0	0	0.083603	0.0799267	0	0	0.0506532	0	0	0.0487712	0.206919	0	0	0.0370137	0	0	0.0315334	0	0	0	0	0.0457498	0	0	0	0.541311	0	0.041117	0	0	0	0.0310982	0	0	0	0.861845	0	0	0	0	0	0	0	0.156417	0	0
ENSG00000185847	0	0	0	0	0	0.0290395	0	0	0	0	0	0	0	0	0	0.0397101	0	0	0	0	0	0	0	0	0.0238368	0	0	0	0	0	0	0	0	0	0	0	0	0	0	0.076464	0	0	0	0	0	0	0.0543313	0	0
RP6-191P20.5	0	0	0	0	0	0	0	0	0	0	0	0	0	0	0.0659688	0	0	0	0	0	0	0	0	0	0	0	0	0	0.0320642	0	0	0	0	0	0.0276312	0	0.0293202	0	0.0294524	0	0	0	0	0	0.0597585	0	0	0	0
ENSG00000243179	0	0.0632167	0	0	0	0.0542308	0	0	0	0	0	0	0	0	0.0722419	0	0	0	0	0	0	0	0	0	0	0	0	0	0	0	0	0	0	0	0.0605174	0	0	0	0	0	0	0.0437051	0	0	0	0	0	0	0
CT83	0	0	0	0	0.407876	0	0	0	0.47822	0	7.06147	0	0	0.0998096	0	0	0	0	0	0	0	0	0	0	0	0	0	0	0.104443	0.666824	0	0	0	0	0	0	0	0	0	0	0	0	0	0	0	9.32781	13.4299	0	0
PRTG	0.00911383	0.0495196	0.0581088	0.0909667	0.00511501	0.0242747	0.00435136	0.0303497	0.00599717	0.00827297	0.0523847	0.0176806	0	0.0112651	0.0808419	0	0.00806038	0.152473	0.0279732	0.0240343	0.00624004	0.0417666	0.018503	0.00490364	0.0647583	0.0588123	0.030555	0.0153917	0.0275053	0	0.0134309	0.0439158	0.00570274	0.00588967	0.179462	0.0128021	0.208398	0.00431053	0.0252649	0.0159794	0.0460842	0.0171178	0.912682	0.0151731	0.0476005	0.00974805	0.00851561	0.0115053	0.0473762
OR5BH1P	0	0	0	0	0.0810721	0	0	0	0	0	0	0	0	0	0	0	0.0638778	0	0.0554214	0	0	0	0	0	0.0394772	0	0	0	0	0	0	0	0	0	0	0	0	0	0	0	0	0	0	0	0	0	0	0	0
ENSG00000233080	0.102432	0	0	0	0	0	0	0	0	0	0.0841089	0	0	0	0	0	0	0.071403	0	0	0	0.0722189	0	0	0.167961	0	0.0572356	0	0	0	0	0	0	0	0.0761138	0	0	0	0	0	0	0	0.846975	0	0	0	0	0	0
RTP5	0	0	0	0	0	0	0	0	0	0.0154137	0	0	0	0	0.0225929	0	0	0	0	0.0191911	0.0697563	0	0.0206842	0.0274084	0.0139216	0.0126433	0.014232	0	0.0219626	0.140222	0	0.0545474	0.0637499	0	0.0189262	0.017889	0.0200831	0	0.060521	0.133973	0	0.0136683	0.0234007	0.169617	0	0	0	0	0
ENSG00000225226	0	0	0	0	0	0	0	0	0.322342	0	0	0	0	0	0	0	0	0	0	0	0	0	0	0	0	0	0	0	0	0	0	0	0	0	0	0	0	0	0	0	0	0	0	0	0	0	0.203425	0	0
RANP9	0	0	0	0	0	0	0	0	0	0	0	0	0.285429	0	0	0	0	0	0	0	0	0	0	0	0	0	0	0	0	0	0	0	0	0	0	0	0	0	0	0	0	0	0	0	0	0	0	0	0
PABPC5	0	0.104537	0.0903873	0.147717	0	0.0256221	0	0.109832	0.0253202	0.0349287	0.0789893	0.134367	0.0224206	0.0634153	0.119461	0	0.0850779	0.0402341	0.0295259	0.0144962	0.158074	0.0813875	0	0	0.157737	0.124154	0.107503	0.0487382	0.0497692	0.0151313	0.0189019	0.041203	0.0361157	0.0372995	0.257331	0.0675634	0.0910201	0	0.0761921	0.168664	0.0449005	0.0309736	0	0.0160153	0.0772963	0	0.0119844	0	0.0857244
ENSG00000273001	0	0.0891378	0	0	0	0.0764674	0.109657	0	0	0	0	0	0.267651	0	0.509318	0	0.101564	0.0800504	0.0881181	0	0	0.16193	0	0.0617875	0.125535	0.0570043	0.128335	0	0.198044	0	0.112823	0	0.143713	0.0742118	0.0853317	0	0.181095	0	2.00103	0.100673	0	0	0	0.0955931	0.0922742	0	0	0.0966469	0
RP11-344H11.5	0	0	0	0	0	0	0	0	0	0	0	0	0	0	0	0	0	0	0	0	0	0	0	0	0	0	0	0	0.144168	0	0	0	0	0	0	0	0.13183	0	0	0	0.130064	0	0.153608	0	0	0	0	0.14071	0
NLRP7	0.0169586	0.0394903	0	0.0260411	0	0	0	0	0	0.0102626	0.013925	0.0131597	0	0.0139744	0.0300854	0	0.0149984	0	0	0	0	0.023913	0.0137718	0	0.00926918	0	0.0094759	0.0143201	0.0438692	0.133375	0	0.0181592	0.0212228	0	0	0	0.0267433	0	0	0.327072	0	0.0182012	0	0.0141167	0	0	0.0105636	0	0
C17orf64	0	0.0870298	0.037625	0	0	0.485284	0	0	0	0.0339257	0.0460326	0.0435027	0.130661	0.0923913	0.0994546	0.102093	0.198323	0.0390787	0	0	0	0.0790504	0	0.0301632	0	0.0278281	0.219274	0	0.0483401	0.132271	0.110155	0	0.0350786	0	0	0.039374	0	0	0.0444025	0.147439	0.479722	0.0300842	0.721074	0	0.135138	0.29981	0	0.0471807	0.374682
RP11-134L4.2	0	0	0	0	0	0	0	0	0	0	0	0	0	0	0	0	0	0	0	0	0	0	0	0	0	0	0	0	0	0	0	0	0	0	0	0	0	0	0	0	0	0	0	0	0	0	0	0	0
DDX26B	0.212714	0.201004	0.21104	0.511257	1.82708	0.32639	0.07065	0.228785	0.109543	0.615645	0.258198	0.200948	0.129332	0.266734	0.20509	0.0589482	0.163588	0.921902	0.141932	0.139367	0.544569	0.358629	0.187763	0.0746409	0.192089	0.22036	0.36174	0.101524	0.318989	0.174567	0.172638	0.128742	0.497679	0.0418366	0.591008	0.227345	0.371905	0.0787356	0.293006	0.299986	0.0791405	0.228299	0.263404	0.192465	0.28239	0.257193	0.25348	0.0700512	0.762346
ENSG00000253891	0	0	0	0	0	0	0	0	0	0	0	0	0	0	0	0	0	0	0	0	0	0	0	0	0	0	0	0	0	0	0	0	0	0	0	0	0	0	0	0	0	0	0	0	0	0	0	0	0
TMEM244	0	0	0	0	0	0	0	0	0	0	0.0813471	0	0	0	0	0	0	0	0	0	0.13566	0	0	0	0	0	0	0	0	0	0	0	0	0	0	0	0	0	0	0	0	0	0	0	0	0	0.0617106	0	0
TUBAL3	0	0.0573099	0	0	0	0.0245818	0.0352513	0	0	0	0.151564	0	0.129062	0	0	0	0	0	0	0	0	0.182194	0	0	0	0	0	0	0.0318324	0	0	0	0	0.0715703	0	0	0.0291082	0.0349206	0.0292395	0	0	0	0	0	0	0	0.0229956	0	0
RP11-397J20.1	0	0	0	0	0	0	0	0	0	0	0	0	0	0	0	0	0	0	0	0	0	0	0	0	0	0	0	0	0	0	0	0	0	0	0	0	0	0	0	0	0	0	0	0	0	0	0	0	0
ENSG00000227290	0	0	0.0501103	0	0	0	0.0712957	0	0	0	0	0	0	0	0	0.203955	0	0	0	0	0	0	0	0	0	0.0370624	0	0	0	0	0	0	0	0	0	0	0	0	0	0.0654546	0	0	0	0.0621516	0	0.0798594	0.0465086	0	0
MTAPP1	0	0	0	0	0	0	0	0	0	0	0	0	0	0	0	0	0	0	0	0	0	0	0	0	0	0	0	0	0	0	0	0	0	0	0	0	0	0	0	0	0	0	0	0	0	0	0	0	0
ENSG00000269898	0	0	0	0	0	0	0	0	0	0	0	0	0	0	0	0	0	0	0	0	0	0	0	0	0.0728506	0.0661616	0	0.112548	0	0	0	0	0	0	0	0	0.105094	0	0	0	0	0	0	0.110949	0	0	0.0830243	0	0
PCNPP3	0	0	0	0	0	0	0	0.134084	0	0	0	0.109357	0	0	0	0	0	0	0	0	0	0	0	0	0	0.0699543	0	0	0	0	0	0	0	0	0	0	0.111118	0	0	0	0	0	0	0	0	0	0	0	0
WNT2	0	0.0514359	0	0.0339184	0	0.0147082	0	0.0630484	0	0.0133671	0	0.034281	0	0.0364031	0	0.0201127	0	0.076987	0	0	0.0907412	0.218026	0	0	0	0	0.0246846	0	0.0190465	0	0.021701	0.0473047	0	0	0.328264	0.0155137	0.0174165	0.0417885	0.157455	0.135549	0.0171832	0.734915	0	0	0	0.0236256	0	0	0
MAGED4B	0	0	0	0	0	0.00893433	0	0	0	0	0	0	0	0	0	0	0	0	0	0	0	0	0	0	0	0.0066603	0	0	0	0	0	0	0	0	0	0	0.0105795	0.012692	0	0	0	0	0	0	0	0	0	0.0225842	0
PROK2	0	0.0319613	0.0552705	0	0	0.0548364	0	0	0	0	0	0.0319524	0.0479846	0.0339303	0	0	0	0.028703	0.0315957	0.0310248	0	0	0	0	0	0.040879	0.0230079	0	0	0.0323839	0	0	0	0.0266095	0.0611932	0	0.0649337	0	0	0	0	0	0.0378302	0	0.0330859	0	0	0	0
GALNT7	0.174038	0.202634	0.298501	0.371175	0.271323	0.373415	0.341607	0.597957	0.165421	0.181385	0.277872	0.172566	0.180279	0.135444	3.17328	0.114451	0.213779	0.323513	0.281926	0.415248	0.2648	0.504448	0.141333	0.0728309	2.29357	0.307167	0.507842	0.171453	0.38351	0.0836462	0.503455	0.310598	0.211749	0.374897	1.15671	0.353121	0.823358	0.0823139	3.33126	0.398382	10.0488	0.181601	1.7322	0.2656	0.543833	0.227515	0.517956	0.0732349	0.61031
EDN1	0.816232	2.45824	1.46813	1.15311	0.476423	1.17398	0.904119	0.900861	7.04682	23.2947	1.26002	1.29212	0.152191	0.887829	0.984665	0.802679	1.27052	2.52626	0.551161	0.885602	0.715336	6.23817	3.71196	0.80807	1.07072	1.03724	4.57907	4.90738	2.22407	0.462199	2.66235	2.69198	1.12362	0.0632973	2.86275	1.12362	1.75056	0.895637	1.16368	2.11805	1.01595	0.840996	1.91976	0.924051	1.15431	1.18732	0.874512	1.0991	0.8486
DRD3	0	0	0	0	0	0	0	0	0	0	0	0	0	0	0	0.0287667	0	0	0	0	0	0	0	0	0	0	0	0	0	0	0	0	0	0	0	0	0	0	0	0	0	0	0	0	0	0	0	0	0
RP11-341D18.5	0	0	0	0	0	0	0	0	0	0	0	0	0	0	0	0	0	0	0	0	0	0	0	0	0	0	0	0	0	0	0	0	0	0	0	0	0	0	0	0	0	0	0	0	0	0	0	0.0233147	0
TUBA1A	8.28487	9.71396	12.488	11.6792	4.33398	8.20398	11.7093	14.7869	3.47274	5.8708	11.7736	10.0124	1.01748	8.44177	9.94767	7.98548	21.4669	8.49372	8.53089	7.71888	4.25103	16.3745	7.24799	5.75211	15.9287	8.11914	18.7991	6.81566	15.4254	5.09668	11.6088	11.5931	7.81856	3.77411	29.6997	8.18997	19.7964	3.72576	47.0402	17.3836	3.38099	2.9362	8.03946	9.20611	11.0847	8.69539	8.72608	5.14367	8.71715
RP11-361A21.1	0	0	0	0	0	0	0	0	0	0	0	0	0	0	0	0	0	0	0	0	0	0	0	0	0	0	0	0	0.0671768	0	0	0	0	0	0	0	0.0614279	0.0736939	0	0	0	0	0	0	0	0	0	0	0
ENSG00000261817	0	0	0	0	0	0	0	0	0	0	0	0	0	0	0	0	0	0	0	0	0	0	0	0	0	0	0	0	0	0	0	0	0	0	0	0	0	0	0	0	0	0	0	0	0	0	0	0	0
SLC5A1	0	0.116433	0	21.1143	0	0.0249707	0	0.594665	0	0.0151292	0.0205283	0.00970005	0	0	0.011088	0.0341462	0	0.0784223	0.0479588	0.0282553	0.0171172	0.0969446	0	0.0201769	0.00683231	0.00620499	0.111755	0	0.183237	0	0.0368427	0.0401555	0.0312867	0.0565463	10.8861	0.00877943	0.00985623	0.0118243	1.495	0.120542	0.00972421	0.00670803	0	0.0104054	0.0602649	0	0.00778646	0.0105201	0.148524
KRTAP2-3	0	0	0.050912	0	0	0	0	0	0	0	0	0	0	0	0	0	0	0	0	0	0	0	0	0	0	0	0	0	0	0	0	0	0	0	0	0	0	0	0	0	0	0	0	0	0	0	0	0	0
ENSG00000255456	0	0	0	0	0	0	0	0	0	0	0	0	0	0	0	0	0	0	0	0	0	0.117582	0	0	0	0	0	0	0	0	0	0	0	0	0	0	0	0	0	0	0	0	0	0	0	0	0	0	0
TMEM71	0.298811	0.154627	0.133698	0.397665	0.0894421	0.0663237	0.1712	0.246397	0.235952	0.0964418	0.376218	0.123667	0.162502	0.279059	0.123691	0.145111	0.123327	0.305499	0.412716	0.240153	0.436458	0.182585	0.129419	0.042873	0.272206	0.346098	0.256014	0.134571	0.429431	0.0470013	0.15657	0.362629	0.398877	0.141608	0.48848	0.293816	0.502632	0.0753748	0.599567	0.541376	0.108478	0.181733	0.45755	0.0994949	0.304128	0.149149	0.372264	0.184418	0.414214
ENSG00000263745	0	0	0.188264	0	0.747808	0.0233482	0.133929	0.100085	0.0461462	0.0212192	0	0.081628	0.0408617	0	0	0	0.434153	0	0	0.211355	0	0.0741645	0	0.0188659	0	0.174054	0.195925	0	0	0	0	0.112639	0	0	0.286603	0	0.0829423	1.19405	0.0277721	0	0	0	0.0322146	0	0	1.61267	1.87838	0	0.0260388
ENSG00000136315	0	0	0	0	0	0	0	0	0	0	0	0	0	0.162302	0	0	0	0.137297	0	0	0	0	0	0	0.107655	0	0.110055	0	0	0	0	0	0.246487	0	0	0	0.155301	0	0.156002	0	0.153221	0	0	0	0	0	0.122689	0	0
ENSG00000276740	0.0960579	0.074561	0	0	0.215645	0	0	0	0.379254	0	0	0	0	0	0	0	0	0	0	0	0	0	0	0	0	0	0	0	0.0828287	1.05765	0	0	0	0	0.0713773	0	0	0	0.8369	0	0	0	0	0	0	0.513712	0	0	0
ENSG00000261453	0	0	0	0	0	0	0	0	0	0	0	0	0	0	0	0	0	0	0	0	0	0	0	0	0	0	0	0	0	0	0	0	0	0	0	0	0	0	0	0	0	0	0	0	0	0	0	0	0
ENSG00000250777	0	0	0	0	0	0	0	0	0.170615	0	0.10645	0.1006	0.151076	0.106827	0	0	0.114656	0	0	0.0976796	0	0.091402	0.210558	0.0697523	0	0	0	0	0.111786	0	0	0	0	0	0	0.0910523	0	0	0	0	0	0	0	0.107916	0.208338	0.415986	1.9381	0	0.192545
RP4-576H24.2	0	0	0	0	0	0	0	0	0	0	0.0316876	0	0	0	0.0342309	0	0	0	0	0	0	0	0	0	0.0210928	0	0	0	0	0	0	0	0	0	0	0	0	0	0.0305654	0	0	0	0	0.0321237	0	0	0	0	0
PIK3CG	0.190285	0.0608181	0.19532	0.739083	0.100513	0.0447199	0.0427534	0.223646	0.014731	0.0474159	0.0827189	0.243205	0.0260881	0.0276707	0.258146	0.0611522	0.168291	0.179459	0.171778	0.345782	0.0919654	0.32356	0.0363595	0.0180674	0.630151	0.311149	0.375265	0.179583	0.0482585	0.0440159	0.340904	0.227728	0.140078	0.130202	0.756876	0.440245	0.60015	0.0317642	0.691511	0.323818	0.330886	0.114127	0.174823	0.204985	0.449701	0.131694	0.362563	0.0471011	0.44886
SPRR2D	0	0	0	0	0	0	0	0	0	0	0	0	0	0	0	0.0571795	0	0	0	0	0	0	1.3259	0.0337873	0	0	0	0	0.108296	0	0.061695	0	0	0	0	0	0	0	0	0	0	0	0	0	0	0	0.0391165	0	0
KRT2	0	0	0	0	0	0	0	0	0	0	0	0	0	0.0216874	0	0	0.0232767	0	0	0	0	0	0	0	0.0431557	0.0130644	0	0	0	0	0.0258571	0.0281821	0	0	0	0	0	0	0	0.115363	0	0	0.0483602	0	0	0	0.0491825	0	0.0195446
ENSG00000226281	0	0.0907071	0	0	0	0	0	0	0	0	0	0	0	0	0	0	0	0	0.0896694	0	0	0.0823905	0.189799	0.0628753	0	0.0580079	0	0	0	0	0	0	0	0	0	0	0.368567	0	0	0.102446	0	0.0627107	0.107363	0	0	0	0	0.0983485	0
ENSG00000253317	0	0	0	0	0	0.0553861	0	0	0.109467	0	0	0	0	0	0	0	0	0	0.0638249	0.0626716	0	0	0	0	0.0454631	0	0	0	0.0717226	0	0	0	0	0	0.123613	0.0584195	0	0	0	0	0	0	0.0764188	0	0	0	0.0518122	0	0.0617688
TMSB4X	588.119	345.422	439.732	1539.33	133.104	342.309	488.58	691.465	255.404	429.103	448.136	183.1	148.169	430.796	172.902	504.602	276.131	489.151	394.075	342.78	590.241	357.228	253.107	161.977	365.413	627.509	345.044	259.863	693.059	206.086	614.481	303.352	255.215	209.038	1087.51	407.894	599.43	1315.73	783.501	802.908	125.864	215.661	568.154	461.337	205.924	376.336	249.701	582.471	554.464
ARSH	0	0	0	0	0	0	0	0	0	0	0	0	0	0	0	0	0	0	0	0	0	0	0	0	0	0	0	0	0	0.0278415	0	0.0758136	0	0.022877	0.0263049	0.0248633	0	0	0	0	0	0	0	0	0	0	0	0	0
LPAR5	0.427838	2.57766	0.109387	0.250276	0.228684	0.189924	0.213997	0.193841	0.348561	0.110961	0.401492	0.110666	0.11871	0.184669	0.126501	0.129856	0.360367	0.468656	0.281394	1.12059	0.306881	0.244188	0.115814	0.0657701	0.82403	0.475316	0.239061	0.137628	0.351348	0.27239	0.280222	0.152709	0.471677	0.197488	0.984012	0.715451	0.337344	0.462521	1.83956	0.48223	0.206035	0.317057	0.542813	0.237428	0.163703	0.610148	0.456863	0.411506	1.18009
ENSG00000249776	0.0872221	0	0	0	0	0	0.0832876	0	0	0	0	0.0676836	0	0	0	0.0794202	0.0771402	0.121601	0	0	0	0.0614952	0	0.0469293	0	0	0	0	0	0	0	0	0.054577	0.0563659	0	0.0612599	0	0.0825062	0	0	0	0	0	0	1.12136	0	0.651976	0	0
PRAC2	0	0	0	0	0	0	0	0	0	0	0	0	0	0	0	0	0	1.1268	0	0	0	0.0712296	0	0	0	0	0	0	0	0	0	0	0	0	0.150142	1.63201	0	0	0	0	0	0	2.32048	0	0	0	0.251727	0	0
ENSG00000249740	0	0.117183	0.0337741	0.154548	0	0.100526	0.048053	0	0.132456	0	0.0413211	0.195251	0.293219	0.0414675	0	0.229108	0.0890125	0.175395	0.115843	0.11375	0	0.141919	0	0	0.110021	0.0499598	0.0281188	0.127481	0.0433924	0	0	0.161657	0.346371	0	0.299146	0.0706881	0	0	0.358721	0.176464	0.274033	0	0.231168	0.12567	0.566098	0.10765	0.188079	0	0.0747407
LILRP1	0	0	0	0	0	0	0	0.0460974	0	0	0	0	0	0	0.042976	0	0	0.0337731	0	0.109515	0	0.034159	0	0	0	0	0.027072	0	0	0	0	0	0	0	0	0	0	0.0458301	0	0	0	0	0	0	0	0	0.0301797	0	0
MNDA	1.90198	0.400362	0.86543	1.33656	0.325667	0.472248	0.461743	0.674782	0.593962	0.312136	1.4294	0.475298	0.262971	0.584412	0.972231	0.205474	0.883835	1.16853	1.06367	3.71628	1.1036	0.750038	0.261792	0.329553	1.62104	1.24817	0.522376	1.08886	1.0563	0.405656	1.80528	1.03558	0.887545	0.499984	1.9882	1.10943	1.90638	0.365929	3.90656	3.95652	0.576793	0.467086	2.48786	0.724539	1.24335	1.96538	1.84742	1.13949	2.44183
DEFB124	0	0	0	0	0	0	0.0869436	0	0	0.0551001	0	0	0	0	0	0.165813	0	0	0	0	0	0	0	0	0.0497662	0.0451968	0	0	0.0785112	0	0	0	0.0569727	0	0.0676567	0	0	0	0	0.239461	0	0	0	0.0757926	0.0731612	0.0973869	0.113432	0	0
CEBPE	0	0.0331542	0	0.0655886	0	0.0284415	0.0407863	0	0	0.0258481	0	0	0	0	0.0378875	0	0.113328	0	0	0.0321827	0.0584893	0	0	0.0689444	0	0.0636071	0	0	0.0368305	0.0671851	0.0419637	0	0	0	0.0317386	0	0.0336786	0.0404036	0	0	0	0	0	0	0	0.137056	0	0.0359472	0.0317191
CD68	0.72774	0.376586	0.24421	0.0465622	0.748797	0.827832	0.144774	0.980912	1.79578	0.568848	0.323679	0.541191	1.34278	1.1244	0.349659	1.54617	1.12634	1.24709	1.1401	1.43936	2.28373	0.833767	0.320118	0.47313	0.546928	1.26435	0.406637	0.512096	1.17659	0.596195	0.804346	0.357162	0.815862	0.411504	0.608354	3.70565	0.884629	0.286831	13.0411	1.59495	0.896369	0.960055	2.22868	0.555305	0.487295	2.52975	0.793302	1.30149	0.653017
PTGES	0	0.135869	8.10605	0.107516	0.039296	3.96291	0.367722	0.166544	0.0460732	0.190671	0.172477	0.0271663	0.611955	0.0576958	0.09316	0.095631	0.0309619	0.658896	0.053726	0.369286	0.383512	0.148094	0.597026	0.0376721	0.191348	0.24329	3.01248	0	0.694302	0.0825994	0.206366	46.8962	0.460018	0.113118	0.468244	0.540935	0.579677	0.165578	0.637747	0.368286	0.0817018	0.0939337	0.578945	0.49541	0.53447	0.112334	0.741439	0.147315	0.44196
ENSG00000203645	0	0.45327	0	0.0498166	0.0728302	0.0432044	0	0.0308668	0	0.0196325	0.0266386	0	0.037806	0	0	0	0.14346	0	0.0497871	0.244438	0	0.0228728	0	0.261827	0.017732	0.0161039	0	0	0	0.153087	0.0318727	0	0	0	0	0	0.0511599	0	0.0256953	0	0	0.0174094	0	0.0540106	0	0.0693989	0.101041	0.054606	0.0240916
NKG7	8.94479	4.9042	7.43261	4.03338	2.70928	5.53068	1.08461	2.90438	4.67138	1.8473	14.3397	10.0811	1.32366	15.5605	5.41544	12.0231	19.3377	8.01669	5.50177	9.78843	34.2183	8.6088	11.9336	3.28485	4.69501	3.31247	7.06073	3.35694	6.97834	30.9309	5.23088	6.15732	8.35103	7.79899	3.90354	3.73947	14.2176	3.15615	6.18501	32.7353	2.48513	9.06682	9.91369	10.9324	5.98943	19.1345	11.3647	3.70421	15.8155
ENSG00000260145	0	0	0.0662917	0	0	0	0	0	0	0.0597738	0	0	0	0	0	0	0	0	0.227376	0	0.135257	0	0.0802127	0	0	0.147091	0.110383	0	0.0851706	0.155366	0.194082	0.105767	0	0.191493	0.220186	0.0693732	0	0	0	0	0.0768386	0	0	0.246664	0	0.105647	0.246108	0	0
GPR84	0.0974684	0.0252186	0.0218052	0	0	0.0865358	0.0310239	0.0309121	0.128274	0.0786451	0	0	0	0.0267722	0.028819	0.0295833	0.0862022	0.0905906	0.0249301	0.269276	0.0889794	0.0229064	0.0263842	0.0349615	0.071032	0.112893	0.0907701	0.0548693	0.05603	0	0	0	0	0.0209958	0.26556	0.0228188	0.0768525	0.122931	0.874923	0.113929	0	0.017435	0	0	0.026106	0.104251	0.0607138	0.109372	0.0723811
CCR4	0.257354	0.0499402	0.158329	0.461049	0.0722184	0.0428415	0	0.591745	0.0282245	0.0129784	0.264148	0.0499263	0.224931	0	0.22828	0	0.0189673	0.194345	0.148107	0.274702	0.46988	0.120964	0	0.011539	0.152386	0.191623	0.395453	0.217314	0.0924631	0	0.2107	0.0229645	0.254969	0.0277185	0.334655	0.150626	0.236741	0.0202867	0.356712	0.206811	0.0333671	0.115088	0.334959	0.0892614	0	0.0688159	0.748104	0	0.286671
CCDC8	0.185927	0.673485	0.207974	0.507562	0.0463774	0.247609	0.216994	0.687946	0.0815638	0.0500069	0.0508894	0.208402	0.0240744	0.272372	0.109948	0.188107	0.621203	0.288012	0.33289	0.031131	0.0565779	0.48065	0.167765	0.0333456	0.835571	0.266623	0.761859	0.191889	0.641284	0	0.142073	0.243333	0.245605	0.200254	1.93418	0.188623	0.65156	0.273583	1.78351	0.235437	0.273204	0.144119	0.132859	0.137573	0.132797	0.0662885	0.205894	0.0521587	0.414214
RP11-360O19.1	0	0	0	0	0	0	0	0	0	0	0	0	0	0	0	0	0.084832	0	0	0	0	0	0	0	0	0	0	0	0	0	0	0	0	0	0	0	0	0	0	0	0	0	0	0	0	0	0	0	0
ENSG00000229400	0.237907	0	0	0	0	0	0	0.0754521	0	0	0.0651166	0	0	0.588125	0	0	0	0.0552798	6.93701	0	0	0	0	0	0	0	0	0	0.615426	0.187107	0	0	0.595456	0.0512478	0	0	0	0	0.0628107	0	0.0616912	0	0	0	0	0	2.96388	0.0667407	0
BMPER	0.0112731	0.0262508	0.0680931	0.155795	0.050615	0.00750648	0	0.193064	0	0	0.0740524	0.148713	0	0.41802	0.0299985	0.041059	0.129611	0.345761	0.121102	0.0254816	0.0154369	0.325868	0.0366189	0.00606542	0.0862626	0.044767	0.0629903	0.0666343	0.0680439	0	0.0110753	0.0241424	0.049377	0.00728506	0.326689	0.0950111	0.106664	0.0106636	0	0.059296	0.070157	1.11916	0.113927	0.0281519	0.0452908	0.0723455	0.175552	0	0.16743
HCRT	0	0	0	0	0	0.3064	0	0	0	0	0	0	0.134057	0.0947932	0	0	0	0.0801892	0	0	0.157526	0.0811054	0	0	0.188629	0	0.0642785	0	0.29758	0	0.113018	0.123181	0	0	0	0	0	0.108817	0.0911136	0	0	0	0	0	0	0	0	0.193629	0
SLFN13	0.1423	0.204341	5.61088	0.142033	0.271538	1.86192	6.90278	1.41484	0.140457	0.0731971	0.186953	0.386484	0.389699	0.164163	0.309249	0.0388715	0.157315	2.12276	0.109191	1.8656	0.438435	0.170557	0.184896	0.0535946	0.17889	0.218974	0.258416	0.144193	0.380378	0.195852	0.202716	0.1219	0.324999	0.105753	15.7497	0.239865	0.274895	0.188449	18.4672	0.274448	0.116234	0.129818	0.189568	0.248753	0.0743218	0.213084	2.30907	0.0299399	10.4881
ENSG00000223795	0	0	0	0.226499	0	0	0	0	0	0	0	0	0	0	0	0	0	0.205641	0	0	0.201983	0	0	0	0	0	0	0	0.127188	0	0	0	0	0.190642	0	0	0	0	0	0	0	0	0	0	0	0	0.0918803	0	0
BX842568.4	0	0	0	0.178502	0	0	0	0	0	0.0703468	0	0	0	0.0957892	0	0	0	0	0	0	0	0	0	0	0	0	0	0	0	0	0	0	0	0	0	0	0	0	0	0	0	0.0623812	0	0	0	0	0	0	0.0863249
B3GALT5-AS1	0	0.0614328	0	0	0	0	0	0.0251007	0	0	0	0	0	0	0	0.0240218	0	0	0	0	0	0	0	0	0	0	0.0589645	0	0.0227483	0	0	0	0.0165076	0	0.0588097	0	0.0208015	0	0.0417906	0	0	0.0141573	0	0	0	0	0	0	0
ENSG00000233470	0	0	0	0	0.522844	0.155081	0	0	0	0	0	0	0	0	0	0	0	0	0	0	0	0	0	0	0	0	0	0	0	0	0	0	0	0	0	0	0	0	0	0	0	0	0	0	0	0	0.290148	0	0
MSR1	0.849667	0.586972	0.718517	1.53957	2.0219	0.792081	1.8174	0.533554	0.73802	0.889537	1.75117	0.599995	1.14858	0.385082	1.41691	0.193416	0.713883	1.24972	1.74729	8.31612	2.07103	0.491221	0.683102	1.04689	2.22916	1.30748	0.916297	1.23405	1.69975	0.534591	2.72967	0.582286	0.627356	1.29584	4.67837	1.289	0.482365	0.538498	5.20207	1.05026	0.502343	0.779693	1.53783	1.44993	1.02409	1.69945	0.354607	1.23709	4.76384
RNF224	0	0	0.0247764	0.113376	0.165751	0.221236	0.0705027	0.0702485	0.145753	0.312765	0.0303129	0	0	0.0608406	0.0982377	0	0.0326495	0.0514674	0	0.0834459	0	0.156166	0.179876	0.0397254	0.0201777	0.238226	0.103139	0.0311729	0.572983	0	0.036269	0.118591	0	0.0477135	0.740649	0.0259281	0	0.0698412	1.08186	0.161816	0	0.0396214	0	0.153651	0.0889897	0	0.114978	0.124276	0.0548293
ENSG00000204282	0.452358	0.702249	0.303599	0.27785	0.135403	0.411659	0.115187	1.13338	0.297665	0.191624	0.495253	0.351026	0.263577	0.372755	0.481503	0.329516	0.546763	0.662189	0.300826	0.431725	0.887863	0.542183	0.220412	0.113581	0.486255	0.501488	0.775138	0.229187	0.494074	0.154166	0.414794	0.387507	1.0756	0.146165	0.717081	0.28594	0.570685	0.114107	1.60035	0.528752	0.527851	0.485502	0.595692	0.364001	0.472523	0.419326	0.403881	0.203042	0.828617
ENSG00000260488	0	0	0.0741232	0	0	0	0	0	0	0	0	0	0.128704	0	0	0	0	0	0	0	0	0.0778666	0	0	0	0	0.0617116	0	0	0	0	0	0	0	0	0	0	0	0	0	0	0	0	0	0	0	0	0	0
DOK3	0.729709	0.844267	1.15505	0.824531	0.602718	0.925951	0.644205	1.13967	0.869743	0.524909	0.881809	0.715824	0.786187	0.544574	0.59842	0.626828	0.669717	1.45881	0.485974	1.91915	2.22471	0.718324	0.324245	0.17038	1.58784	1.00465	1.06165	0.441788	1.13971	0.866257	1.2715	0.707657	1.48179	0.329204	1.79035	0.512507	0.868477	0.416758	2.05012	2.19673	0.278474	0.413753	0.746308	0.744956	0.829721	2.15003	1.21783	0.776343	1.46208
ENSG00000236648	0	0	0	0	0	0	0	0	0	0	0	0	0	0	0	0	0	0	0	0	0	0	0	0	0	0	0	0	0	0.0855784	0	0	0	0	0	0	0	0	0	0	0	0	0	0	0	0	0	0	0
C4orf26	0	0.0250836	0	0	0	0.0430362	0	0	0	0.019556	0	0	0.0376588	0	0.0286646	0.0294249	0	0	0	0	0	0.0227838	0	0	0	0	0.0180568	0	0	0	0.0317486	0.0346033	0.0404412	0	0.0240125	0	0	0	0	0	0	0.0173416	0	0	0.0519323	0.0691286	0.0201296	0	0.0239978
HLA-DPA1	24.3887	10.2183	13.2761	16.154	4.54964	5.12108	10.288	4.68047	13.8904	7.88965	23.9516	5.64537	1.18422	5.76645	14.9549	7.02385	20.2113	16.2844	14.6381	46.4968	8.77615	8.64636	6.56438	4.3927	72.6223	24.8948	13.2598	7.45954	31.4751	13.4412	31.7322	10.5104	105.639	10.1191	15.2564	16.375	9.65149	6.66323	82.6728	105.89	5.99181	8.9359	37.9388	18.2734	29.6736	28.272	6.00627	7.72621	41.2821
GPX8	0.737892	0.919078	1.4166	1.79185	0.404501	0.902702	0.835697	2.26947	0.383927	0.86193	0.774985	1.1452	0.239973	0.480779	1.20251	1.1719	1.8971	1.01677	0.882228	0.555975	0.563965	2.49233	0.654974	0.470882	2.83258	1.81438	1.46705	0.869425	1.03579	0.553339	1.23073	2.53578	0.612044	0.942613	3.95288	1.16909	3.20677	0.535672	5.64054	1.57959	0.640772	0.469649	1.15091	0.428538	1.51675	1.56013	1.45374	0.34661	1.29983
RP11-618M23.1	0	0	0	0	0	0	0	0	0.0380299	0	0	0	0	0	0	0	0	0	0	0	0	0	0	0	0	0	0.0161466	0	0	0	0	0	0	0	0.0214722	0	0	0	0	0	0	0	0	0	0	0	0	0	0
ENSG00000231422	0	0	0	0	0	0	0	0.0211074	0	0.0134251	0	0	0	0.0182806	0	0	0	0	0.0170228	0	0	0	0	0	0	0	0.0123959	0	0	0	0	0	0.0416441	0	0	0	0	0	0.017571	0	0	0	0.0203818	0	0	0	0	0	0
ENSG00000248747	0	0	0	0	0	0	0	0	0	0	0	0	0	0	0	0	0	0	0	0	0	0	0	0	0	0	0	0	0	0	0	0	0	0	0	0	0	0	0	0	0	0	0	0	0	0	0	0	0
SRPX2	1.03712	0.979085	0.808938	1.67866	0.534877	0.839914	0.615618	0.506721	5.75479	0.610662	5.91519	0.47853	2.71121	1.1087	1.14373	1.25063	1.43784	2.16887	0.860342	0.506878	0.806056	1.42291	0.250394	0.437366	1.42483	0.473078	1.51926	0.449717	2.07862	0.484992	0.302926	0.270134	1.9644	0.579655	5.95693	2.14588	1.3924	0.159089	5.86113	0.466889	3.70694	1.00782	1.18462	1.35332	1.35138	1.58899	1.34445	1.08516	0.957521
FCGR1A	0.287821	0.189039	0.19317	0.169988	0.0497033	0.265366	0.253697	0.147456	0.699304	0.294762	0.272695	0.0171805	0.206407	0.237173	0.274943	0.141118	0.450362	0.308667	0.526651	1.01759	1.06112	0.0936581	0.269695	0.166773	0.459848	0.230793	0.222681	0.373909	0.82091	0.870627	0.304524	0.0237076	0.221657	0.0715384	0.378385	0.0310999	0.0872858	0.314146	1.54316	0.621098	0.0861167	0.083168	0.223751	0.350168	0.622651	0.639382	0.165495	0.0186331	0.295946
KLHL6	0.132173	0.151448	0.135173	0.405921	0.197814	0.142494	0.150251	0.22157	0.107682	0.0799856	0.40311	0.13187	0.264047	0.134846	0.273562	0.0573097	0.144728	0.298341	0.275283	0.791958	0.542976	0.1065	0.102224	0.0474099	0.557301	0.374912	0.369269	0.116924	0.499297	0.14355	0.284443	0.134791	0.307186	0.162695	0.860534	0.278493	0.223321	0.0833512	0.757731	0.347612	0.112613	0.128347	0.248647	0.309114	0.126433	0.161567	1.46237	0.0953456	0.62631
CHRNA9	0	0.0162631	0	0	0.0470362	0	0	0	0	0	0	0	0	0	0	0.0190779	0	0	0	0.0157866	0.0286908	0	0	0	0	0.0104004	0.0117073	0	0	0	0	0	0	0	0	0	0.0165204	0	0	0	0	0	0	0	0	0.0672301	0	0	0
TFAP2A	0.53938	0.143723	0.0864486	0	0.189765	0.611108	0.330554	1.27915	0.0211898	0.384872	0.224753	0.0124942	0.103197	0.066338	0.164242	0.564437	0.484154	0.274977	0.123547	0.260826	0.0330718	0.476776	0	0.0389835	0.110005	0.0239771	0.0944648	0.0203938	0.0971843	0.00633145	0.0474554	0.0172408	0.0352616	0.0936446	9.9122	0.0508877	6.03664	0.0685367	2.16794	0.0352875	0.018788	0	0.0887552	0.154132	0.109968	0	0.361058	0.0474267	0.197286
ENSG00000231363	0.626189	0.72908	0	0	0	0	0	0	0	0.378943	0.257088	0.242959	0	0	0	0.285089	0	0	1.68172	0	0	0	0	0	0	0.932504	0	0	0	0	0	0	2.93866	0.202332	0.23265	0.2199	0	0.296166	0	0	0.487128	0	0	0	0.251578	0	0	0	0
KLRC3	0	0	0	0	0	0	0.0552107	0	0	0	0	0.0448669	0	0	0	0	0	0.0403041	0	0	0	0.0407647	0	0	0	0	0.0323072	0	0	0	0	0	0	0	0	0.0812174	0.0455894	0	0	0.0506874	0	0	0	0	0.0464586	0	0	0	0
ENSG00000267147	0.0864271	0.0670855	0.116011	0	0	0.0575497	0.0825285	0.082231	0.113743	0.0523021	0.0709669	0.134133	0	0	0	0.0786963	0.305749	0.0602463	0	0.0651197	0	0.0609347	0	0.186006	0.188956	0.25741	0.0482926	0	0.0745243	0.0679724	0	0.185092	0	0.0558521	0	0	0	0	0.0684539	0.303068	0	0	0.238212	0	0	0	0.107672	0.145474	0.0641817
ENSG00000248571	0	0.0434598	0	0	0	0	0	0	0	0	0	0	0	0	0	0	0	0.0195146	0	0	0	0	0	0	0	0	0	0	0	0	0	0	0	0	0	0	0	0	0	0	0	0	0	0	0	0	0	0	0
ENSG00000236908	0	0	0	0.0339297	0	0	0	0	0	0	0	0	0	0	0	0	0	0.0154025	0	0	0	0	0	0	0	0	0	0	0	0	0	0.0236602	0	0	0	0	0	0	0.140007	0	0.0171889	0	0	0	0	0	0	0	0
TRPA1	0	0	0.00698574	0.0159832	0	0	0	0.0594199	0	0	0.00854674	0.00807703	0	0	0	0.00947762	0	0.0145113	0.00798687	0.156851	0	0.00733853	0	0.00560031	0.00568913	0	0.011632	0.0175785	0	0	0	0	0.0130259	0	0.0386716	0.0146209	0	0	0.0412205	0	0	0	0	0	0	0.011133	0.00648363	0	0
F13A1	0.608564	0.340548	0.579409	1.4778	0.857843	0.678522	0.108114	1.53507	1.9557	1.50737	0.557809	0.230629	0.197913	0.139946	0.376613	0.244848	0.488155	0.739912	0.814481	0.895736	0.426361	0.209542	0.793029	0.106606	0.959204	3.12624	0.869884	0.824601	5.56482	0.356181	0.180757	1.50031	4.67579	1.3536	1.31454	0.844903	1.35026	0.655986	0.661361	0.905716	1.26612	0.941757	0.975195	0.141372	4.73073	2.73989	1.8954	2.60848	1.10354
ENSG00000225064	0	0	0	0	0	0	0	0	0	0	0	0	0	0	0	0	0	0	0	0	0	0	0	0	0	0.062999	0	0	0	0	0	0	0	0	0	0	0	0	0	0	0	0	0	0	0	0	0	0	0
GRM4	0.00814429	0.00316084	0	0	0	0.0108462	0	0.0503678	0.00535919	0	0	0	0	0	0.039733	0	0	0.0198702	0.0249974	0	0.0111524	0.00287103	0	0.00219099	0.296024	0	0	0	0	0.00640525	0	0.0130813	0	0.00263156	0.00605174	0.0057201	0.00321083	0	0.00967593	0.00356989	0	0	0.0187062	0	0.00327205	0	0.0126829	0	0
ENSG00000226434	0	0	0	0	0	0	0	0	0	0	0	0.175793	0	0	0	0	0	0	0	0	0.155107	0	0.0919846	0	0	0	0.126583	0	0	0.979917	0	0	0	0	0	0	0	0	0	0	0	0	0	0	0	0	0.0705565	0.0953275	0
ENSG00000253168	0	0	0	0	0.101368	0	0	0.085923	0	0	0	0	0	0	0	0	0	0	0	0	0	0.0636705	0	0	0	0	0.0504608	0	0	0	0.0887233	0	0	0	0	0	0	0	0	0	0	0	0	0	0	0	0	0	0
ENSG00000212743	0.0271255	0.21055	0.0364103	0.0833059	0	0.0361243	0	0.283894	0	0	0	0	0	0	0	0	0	0.0189085	0	0.0204381	0.0371444	0.114747	0	0	0.0296523	0.0403945	0.075784	0.0229052	0.0233897	0.0213334	0.106598	0	0.135784	0	0.443432	0.0190514	0.149716	0.0513177	2.25587	0.0713394	0.0211016	0.0145565	0	0	0	0	0.0168967	0	0.0402873
FCGBP	0.322636	0.373662	0.216536	0.110095	1.12669	0.37852	0.146706	0.979387	2.10956	0.452475	0.315384	0.0755064	0.2984	0.0590803	0.417923	0.116578	0.996437	1.44937	0.255427	1.20776	0.161294	2.08335	0.295279	0.0991956	0.400276	0.762637	0.394895	0.090813	0.229627	0.0281938	0.120753	0.175481	0.249948	0.281308	0.82577	0.25178	0.327078	0.21315	33.3137	0.215499	0.227083	0.107181	0.531671	0.204624	0.37858	0.712087	0.360475	1.12491	0.425943
AC021876.4	0	0	0.124089	0	0	0	0	0	0	0	0	0.143474	0.215463	0	0	0	0	0.128883	0	0	0.253182	0	0	0	0	0.0917785	0.103311	0	0	0	0	0	0	0	0	0	0	0	0	0	0	0	0	0.153908	0	0	0.345511	0	0
TNFRSF11B	7.81861	24.9863	0.898209	0.648972	18.6329	0.5472	0.538085	7.12626	21.1048	11.6227	0.212072	0.163978	0	0.541733	0.249921	3.44204	0.622961	0.409172	3.40509	0.459961	0.160758	0.248308	0.0381344	0.0252658	0.166832	2.7156	0.393583	1.34819	0.99204	0.0738632	0.207607	0.0251416	7.08134	0.303463	4.09997	4.74928	0.53688	3.70904	1.41334	0.329334	0.858462	0.440993	2.37285	0.058634	21.4319	1.35611	6.23044	0.0197601	2.80719
FABP6	0	0.221313	0.267901	0	0.128016	0	0	0	0	0	0.749176	0	0	0.0469894	0.252909	0.0519234	0	0	0	1.67566	0	0	0	0.0306814	0.342848	0.0566125	0	0	0.0491706	0.179391	0	0	0	0.221105	0.16949	0.0400505	0	0.431527	0.0451654	0	0	0	0	0	0	0.0609923	7.10414	0.0479914	0
ENSG00000273108	1.1588	0.143915	0.031109	0.142353	0.0520288	0.123458	0	0.132305	0.0610019	0.0280503	0	0	0	0.0381953	0.0411153	0.0422059	0	0	0.106702	0	0	0	0	0.0249394	0.202679	0.0460174	0.0517998	0.0391403	0.0799366	0	0.0455388	0	0.0870106	0.0599084	0.172213	0.19533	0	0	1.32166	0.121905	0	0	0.0425853	0.0771687	0	0	0	0	0.0688429
ENSG00000248184	0	0	0	0	0	0	0	0	0	0	0	0	0	0	0	0	0	0	0	0	0	0	0	0	0	0	0	0	0	0	0	0	0	0	0	0	0	0	0	0	0	0	0	0	0	0	0	0	0
RHBDF1P1	0	0	0.0459021	0	0	0.0683124	0	0.0325365	0	0.041389	0.0280796	0	0	0	0	0	0	0	0	0	0	0	0	0.0183994	0	0	0.019108	0	0	0.0268948	0.0335969	0.0366179	0	0	0	0	0	0	0	0	0	0.0183512	0.0314179	0	0.0274778	0	0	0.02878	0
ENSG00000271032	0.25238	0.881549	1.18569	0.193773	0.708225	0.924296	0.361494	0.720381	0.166074	0	0.207234	0.0979225	0.441166	0	1.45514	0	0.446416	0.967606	0.484147	0	1.2096	0	0.102477	0.135792	0.413836	0.250559	1.41022	0	0.326433	0.793959	0.123976	0.270248	0	0.570839	1.50028	0.265887	0.397997	0.47747	0.499739	0	0.0981665	0	1.04342	0.525217	0	0.134972	0.393024	0.424806	0.18742
ENSG00000253567	0	0	0.0607749	0	0	0	0.0864692	0	0	0	0.0743555	0	0	0	0	0	0	0	0	0	0	0	0	0	0	0	0	0	0	0	0	0	0	0	0.0672875	0	0	0	0	0	0	0	0	0	0	0	0.0564067	0	0
CORO2B	0.249034	0.425266	0.501416	0.71383	0.149085	1.205	0.237801	1.2637	0.0436992	0.0502351	3.74893	0.193249	0.0193475	0.109446	0.0294533	0.120938	0.396448	0.45135	0.394922	0.0875647	0.136407	0.456507	0.175272	0.151857	1.02541	0.39558	0.565885	0.126173	0.529685	0.104458	0.293599	0.159999	0.280488	0.0965608	0.863562	0.174908	0.510537	0.0314093	0.762684	0.247428	0.116238	3.41229	0.167785	0.511344	0.373528	4.22632	0.299909	0.125752	0.530149
SEMA3E	0	0.0152702	0	0.0151044	0.0331233	0.0261993	0	2.87316	1.42398	0.0119052	0	0	0	0.0243164	0.0261754	0	0.0173988	0.0137134	0	0.0148227	0	0.00693507	0	0	0.00537635	0.00976541	0	0	0	0	0	0.0210656	0	0.00635662	0.3216	0.00690853	0.0155117	0.00930457	1.26991	0.0344927	0	0	0.0361483	0	0	0	3.29029	0	0.0219138
ENSG00000232837	0	0	0	0	0	0	0	0	0	0	0	0	0.048405	0	0	0	0	0	0	0	0	0.0585705	0	0	0	0	0.0928378	0	0	0	0	0	0	0	0	0	0	0	0	0	0	0	0	0.0345762	0	0	0	0.0349574	0
GRIN2D	0.0130328	0.900339	0.174938	0.200127	0.102403	0.772361	0.161784	0.186001	0.0514558	0.0473214	0.0428059	0.0707934	0.0455632	0.0536969	0.115604	0.225474	0.149843	1.83514	0.120005	0.157116	0.178465	0.211339	0.201091	0.0841465	0.277813	0.239367	0.145646	0.154071	0.471992	0.389497	0.102433	0.0976883	0.138634	0.0589556	0.794106	0.109842	0.226076	0.0616407	0.639996	0.217081	0.0506927	0.0489569	0.179606	0.0433951	0.125665	0.209096	0.178601	0.087747	0.483914
RPL23AP6	0.140627	0	0	0	0	0	0	0	0	0.0851017	0	0	0	0	0	0	0	0	0	0	0	0.0991479	0	0	0	0	0	0	0.12126	0	0.13816	0	0	0.0908781	0.522476	0.0987686	0.110883	0.133024	0	0	0	0	0.1292	0	0	0	0	0	0
SFMBT2	0.273427	0.279531	0.26855	0.481308	0.172171	0.337492	0.184675	0.469542	0.236972	0.0968584	0.317608	0.124201	0.365267	0.181348	1.06479	0.0667966	0.300803	0.320765	0.373561	0.552729	0.474873	0.305622	0.167888	0.0609991	2.4094	0.430353	0.462071	0.230886	0.529045	0.225532	0.327598	0.19995	0.363044	0.168078	2.3142	0.341924	0.830823	0.0883172	1.28355	0.473558	4.39418	0.1181	0.177684	0.521829	0.321518	0.342385	0.353102	0.162765	0.792388
ENSG00000223726	0	0	0	0	0	0	0	0	0	0	0	0	0	0	0	0	0	0	0	0	0	0	0	0	0	0	0	0	0	0	0	0	0	0	0	0	0	0	0	0	0	0	0	0	0	0	0	0	0
TM4SF19	0.0699063	0.0271309	0.0234587	0.214691	0.117702	0	0.166882	0.0332562	0.0460004	0.0634566	0.229605	0.0813701	0.122198	0.0288024	0.0620086	0	0.030913	0.09746	0.0268206	1.44848	0.28718	0.0492868	0.0283849	0.206869	0.0191046	0.0173504	0.0390613	0.11806	0	0.0824689	0.03434	0.112283	0.0656131	0.0451758	0.0519449	0.0736474	0.0551201	0.132253	0	0	0.0271909	0	0	0.261862	0	0.0373855	0.0870903	0.205915	0.0778697
PF4V1	0	0.0987005	0.0853411	0	0	0.0846708	0	0.241967	12.551	0.1539	0	0	0	0	0	0	0	0.0886382	0.292714	0.0958083	0	0	0	0	0.0695011	1.13615	0.142102	0	0.438579	0	0	0	6.76305	0.0821733	0.566916	2.67924	0	0.481128	0.100714	0	0	0.409421	0	0.105848	0.102173	0.136006	0.0792071	0	0.188856
AC004004.2	0	0	0	0	0.298021	0	0	0	0	0	0	0	0	0	0	0	0	0	0	0	0	0	0	0	0	0	0	0	0	0	0	0	0	0	0	0	0.209346	0	0	0	0	0	0	0	0	0	0	0	0
SPP1	6.09138	43.2418	1756.57	0.131742	12.7118	1.58055	15.6748	80.8397	127.363	10.4184	1165.34	15.1348	399.453	0.542008	2.86649	3.46332	1.16345	22.4668	22.2952	1966.8	7.08812	0.50407	0.510929	197.476	23.3527	3.76189	83.3337	6.68917	4.19211	2.00175	5.50688	18.0674	13.5998	22.6392	326.934	9.01845	1.62354	42.0656	5719.45	458.769	4.20471	0.491094	0.945868	5.66573	644.541	1.95764	2.72553	1199.86	7.34807
ENSG00000231789	0.636192	0.164606	1.04372	0.217092	0	4.65987	0.134999	2.55573	0.0930296	0.0427774	3.59868	0.0548533	3.37742	0.116498	0.250808	2.63897	0.750207	0.1971	2.27812	0.106522	0.193594	0.24919	0.229619	0.0380332	0.347728	0.561423	0.631969	0	0.304764	0.444752	1.04172	0.756925	0.0442312	0.091362	0.840412	0.148942	0.557365	0.468062	0.279939	0.309846	0.16497	0.0379336	1.36382	0.0588422	0.170398	0	5.85627	2.67709	2.41471
DAPP1	0.452431	0.0453137	0.0783607	0.0896436	0.016382	0.0777452	0.0278724	0.0555439	0.115244	0.494593	0.287613	0.124578	0.136062	0.0721579	0.284806	0.0398673	0.103261	0.37642	0.201579	0.494841	0.459658	0.298403	0.0948161	0.06282	0.255265	0.166626	0.212029	0.0862671	0.251691	0.25252	0.200739	0.171906	0.246568	0.075452	0.34703	0.25626	0.483319	0.0966382	0.288987	0.57575	0.0681208	0.195799	0.455892	0.218679	0.257994	0.265373	0.736376	0.098262	0.476875
UGT8	0.226009	0.0548219	0.170646	0	0.0634222	0.00940586	0	0.0134398	0.0929504	0	0.0463951	0	0.345685	0	0.0375892	0.0128621	0	0.0196932	0	0	0	0.0597546	0.0114712	0.00760017	0	0	0.0157858	0	0.231423	0.0222187	0	0.0302512	0.0088387	0.00912842	0.125955	0	0	0.29396	12.676	0.0123833	0	0.00758027	0.0129777	0.0117584	3.3256	0.151085	1.30224	0.0475522	0.0209796
DUSP13	0.0282331	0.109574	0.0568456	0.0433538	0	0.0187997	0	0.0268624	0.891754	0.0170855	0.0927309	0	0.197408	0	0	0.0514154	0	0	0	0.0425452	0.115984	0.0199055	0	0.0759532	0.0308631	0.0140147	1.0412	0.0238405	0	0.0222045	0	0.0604638	0.0353323	0.0364904	0.020979	0	0	0	0.0223618	0	0	0	0	0	0	0	0.0351732	0.0475218	0
VSIG8	0	0	0.147023	0	0.040982	0.0729342	0	0	0	0	0	0	0.0425474	0.0601712	0	0	0	0.0254506	0	0	0	0	0	0	0.0199558	0.0724939	0.122405	0	0	0.0287144	0	0	0	0	0.108519	0	0.028788	0	0.0289178	0	0	0.0195928	0	0	0.0293369	0	0.0227426	0.0307271	0
ENSG00000228951	0	0.392098	0.0678052	0	0.340207	0.403636	0	0.096124	0	0	0.165914	0.156795	0	0	0	0	0.178702	0.0704249	0	0.380608	0.138345	0	0	0.652295	0	0.300899	0.0564516	0.170621	0.261345	0.317825	0	0	0.568946	0.326442	0.0750711	0.070957	0	0	2.24054	0	0	0	0	0	0.0811788	0.540297	0	0	0.375126
PTGER2	0.778368	0.166669	0.162124	0.288505	0.271147	0.107234	0.0768887	0.970413	0.247264	0.0974557	0.528937	0.0833114	0.406617	0.176937	0.23808	0.171076	0.261116	0.355485	0.947385	0.44491	0.551309	0.264929	0.261559	0.0144412	0.132032	0.213173	0.404931	0.15865	1.75893	0.126655	0.975669	0.057481	0.65499	0.173451	0.458714	0.659789	0.677222	0.0253891	0.46769	1.15296	0.0417594	0.230455	0.690458	0.290451	0.1941	0.287081	0.317661	0.203299	1.11618
ENSG00000238062	0.0898673	0.083707	0	0.717585	0.0403495	0.0119681	0	0.0342017	0	0.0108768	0.295167	0	0.125672	0.0148106	0	0.278218	0	0.0250578	0.0551662	0.0135424	0.0246121	0.012672	0	0	0.00982388	0.0178437	0.010043	0	0.0464944	0.0424068	0.0353163	0	0.0112464	0	0.0667773	0.0883649	0.184234	0.0170017	0.0427072	0.0157566	0	0	0.181642	0.0149615	0	0	0.0783707	0.0756322	0.0400418
CD2	4.98116	3.31408	3.1839	3.52093	0.887496	2.0796	0.415248	1.54216	2.54937	0.502399	7.75826	1.44184	1.47423	3.1599	3.64695	3.02374	6.46825	4.49188	5.2176	5.77863	11.8555	0.808301	1.95836	0.467951	1.94471	5.20033	2.71704	2.16985	11.0788	5.62758	2.60225	0.338655	5.34315	0.945262	5.34637	2.36009	4.64452	1.04708	3.31905	11.4715	0.153769	1.88812	6.97355	4.27806	0.730609	5.79292	6.91975	1.19775	8.51372
RP11-370B6.1	0	0	0	0	0	0	0	0	0	0	0	0	0	0	0	0	0	0	0	0	0.209913	0	0	0.0824785	0	0	0	0	0	0	0	0	0	0	0	0	0	0	0	0	0	0	0	0.127605	0	0	0	0	0
CCDC182	0	0	0	0	0	0	0	0	0	0	0	0	0	0	0	0	0	0	0	0	0	0	0	0	0	0	0	0	0	0	0	0	0	0	0	0	0	0	0	0	0	0	0	0	0	0	0	0	0
FGR	2.10172	0.69704	1.38491	1.20291	0.364591	1.05597	0.529095	2.03603	1.13154	0.358436	2.43175	1.17129	1.22462	1.71613	1.25415	0.469731	1.52082	1.81134	0.850337	2.97999	3.81989	1.09114	0.667193	0.76073	1.32628	1.10018	2.08183	0.774424	0.955558	0.856523	1.20137	0.920664	1.5542	1.09891	2.28578	1.15406	2.36524	0.542204	3.79842	3.91948	0.758035	1.24064	2.33467	2.81513	1.09003	1.83925	1.98757	0.4824	4.11472
DEFB4A	0	0	0	0	0	0	0	0	0	0	0	0	0	0	0	0	0	0	0	0	0	0	0	0	0	0	0	0	0	0	0	0	0	0	0	0	0	0	0	0	0	0	0	0	0	0	0	0	0
ENSG00000255327	0	0	0	0	0	0	0	1.32606	0	0	0	0	0	0	0	0	0	0	0	2.10024	0	0	0	0	0	0.0432395	0	0	0	0	0	0	0	0	0	0	0	0	0	0	0	0	0	0	0	0	0	0	0
ENSG00000260711	0.0478007	0.0148413	0.0320813	1.86439	0	0.0763903	0.337769	0.163728	0.0125817	0.0231416	0.16485	0.0148372	0.0111409	0.165434	0.127201	0.200215	0.00845509	0.0666415	0.418139	0.0288129	0.0916386	0.0269612	0	0.0771565	0.621816	0.123385	0.0961539	0.00807273	0.337984	0	0.0187849	0.0307109	0.197406	0.0556028	1.25737	0.221579	0.195989	0.126605	1.0828	0.0502859	0.0297483	0.0872151	0.114182	0.0318322	0	0.0306762	0.148877	0	0.26268
ENSG00000277342	0.251901	0.293292	0.253594	0.386811	0	0	0	0.359507	0	0	0.310261	0	0.587106	0	0	0	0.111392	0.526784	0.0966456	0	0.344943	0.266401	0	0	0	0	0	0	0.108605	0.198113	0.247482	0.134868	0	0.162787	0.374358	0	0.0993104	0	0	0	0.0979802	0	0	0.419376	0	0	0.156911	0.106	0.187065
ENSG00000260402	0	0	0	0	0	0	0	0	0	0	0	0	0	0	0	0	0	0	0	0	0	0	0	0	0	0	0	0	0	0	0	0	0	0	0	0	0	0	0	0	0	0	0	0	0	0	0	0	0
ENSG00000223884	0	0.138685	0	0	0	0	0	0	0	0	0	0	0.104107	0	0.0792425	0	0	0	0.0685494	0	0	0	0	0	0	0	0	0	0.0770318	0	0	0	0	0	0.265527	0	0.0704395	0	0.212271	0	0	0	0	0	0.0717826	0	0	0	0
RP11-963H1.1	0	0.0334556	0	0	0	0	0	0	0	0	0	0	0	0	0.0382319	0	0	0	0	0	0	0	0	0	0	0	0	0	0	0	0	0	0	0	0	0	0	0	0	0	0	0	0	0	0	0	0.0805444	0	0.0320075
ENSG00000268580	0	0	0	0	0	0	0	0	0	0	0	0	0	0	0	0	0	0	0	0	0	0	0	0	0	0	0	0	0	0	0	0	0	0	0	0	0	0	0.0640348	0	0	0	0	0	0	0	0	0	0
ENSG00000258399	0.778428	0.0232393	0.100469	0	0	0	0	0.056972	0	0	0.0245839	0	0	0	0	0.054523	0	0.0208702	0.0229735	0	0.0409979	0.0422173	0.0243135	0.0161088	0	0.0148617	0.0167292	0	0	0	0	0.0320592	0	0	0.022247	0.0210279	0	0	0.0237134	0.0262468	0.0232907	0	0.632653	0.0996893	0.024057	0	0.0745983	0	0.0222334
CYMP	0	0	0	0	0	0	0	0	0	0	0	0	0	0	0	0	0	0	0	0	0	0	0	0	0	0	0	0	0	0	0	0	0	0	0	0	0	0	0	0	0	0	0	0	0	0	0	0	0
LCE1A	0	0	0	0	0	0	0	0	0	0	0	0	0	0	0	0	0	0	0	0	0	0	0	0	0	0	0	0	0	0	0	0	0	0	0	0	0	0	0	0	0	0	0	0	0	0	0	0	0
RP11-222G7.2	0	0	0	0	0	0	0	0	0	0	0.104611	0	0	0	0	0	0	0	0	0	0	0	0	0	0.0696345	0.126482	0.0711875	0	0.109855	0	0	0	0	0	0	0	0	0	0.100907	0	0	0	0.117048	0	0	0.136267	0	0	0
KRT16	0	0	0	0	0	0.0535735	0.0768265	0	0	0.0162295	0	0	0	0.0441985	0.713662	0.0732591	0	0	0	0	0	0.0189082	0	0.0144296	0.161243	0.0133125	0.0299706	0.0679381	0.855629	0	0.184437	0.0287173	0.0671242	0	0.019928	0	0.0845844	0	0.29738	0.0235108	0	0	0	0	0	0	0.785159	0	0
ENSG00000258130	0	0.0190327	0.0164566	0	0.137616	0.0326547	0	0	0	0	0	0	0	0	0.02175	0	0	0.0170924	0	0.0369501	0.0335768	0	0	0	0.0670107	0.109544	0.0822062	0	0	0	0.02409	0	0.0153428	0.0158457	0.0182201	0.0172216	0.0386676	0	0.40784	0.0644874	0.0381497	0	0.0450552	0	0	0.0262265	0.0305476	0	0.0182089
ITLN1	0.0895158	0	0	0	3.61725	0.0298032	0.128217	0.0425849	0.117808	0.0270856	0.0735031	0.0347318	1.19965	1.25398	0	0.0407544	0.316675	0.530395	0.515161	0.168617	0.122579	0.473343	0	0	0	0.311044	0.0250092	0	0.617501	0.774418	0	0	0.0840184	5.98729	0.0665161	0.0314355	0.070582	0	0	0.0784749	0	2.23374	0.0411208	0.111772	0	0.0957452	1.5334	0	0.199426
WFDC8	0	0	0	0	0	0	0	0	0	0	0	0	0	0	0	0	0	0	0	0	0	0	0	0	0	0	0	0	0	0	0	0	0	0	0	0	0	0	0	0	0	0	0	0	0	0	0	0	0
ENSG00000259130	0	0	0	0	0	0.0758116	0.108717	0.108325	0	0	0	0	0	0	0	0	0	0	0	0	0	0	0	0	0.0622291	0	0	0	0	0	0	0	0	0	0	0	0	0	0	0	0	0.122194	0	0	0	0	0	0	0
ENSG00000273837	0.292405	0	0	0	0	0.0973527	0	0.278209	0.769646	0	0.480199	0	0.340754	0.120475	0.129685	0.399375	0.129303	0	0.112186	0.660951	0.400407	0.721552	0	0.0786634	0.879021	0.145148	0.408466	0	0.50427	0	1.00547	0	0.457413	0.0944812	0.434552	0.924161	0.345836	0	0.926389	0.897189	0	0.470744	0.805932	0.973618	0.939815	0.625507	0.364283	0	0.542858
ENSG00000215866	0.0364103	0	0.0244367	0.279552	0.0408696	0	0	0	0.0479181	0.066102	0.0597944	0.0282541	0	0.0300031	0	0	0.0644034	0.0253808	0.0558774	0	0.199435	0.0256708	0.0591365	0	0.0995052	0.0180738	0.0406897	0.0307454	0.0313958	0.0286357	0.0715432	0.0389881	0.0455656	0.0705888	0.0811657	0.0511451	0.028709	0	0.230708	0.0638389	0	0.0390781	0.0669031	0	0.0585129	0.155776	0.0453605	1.13379	0.0270387
FOXF2	0.0607005	0.164907	0.244434	0.279629	0	0.181885	0.144906	0.606412	0	0.0367334	0	0.0235516	0	0	0.269214	0.0552709	0.37579	0.0211565	0.326041	0.0228678	0	0.106991	0	0.0816488	0.779671	0.0301312	0.542678	0.128141	0.549578	0.0716088	0.208725	0.389988	0.151927	0.0784535	0.947193	0.0426326	0.263238	0	2.2356	0.239461	0.0708307	0.032574	0	0.101057	0.219483	0.194774	0.113432	0.0766282	0
ADAM28	0.113572	0.0991754	0.0857517	0.119899	0.0318705	0.0756251	0.0474466	0.587568	0	0.0472514	0.145713	0.0220328	0.0248159	0.0526426	0.0692598	0.0387801	0.0878892	0.0791687	0.272336	0.310201	0.106921	0.0450412	0.0807017	0.0190959	0.190108	0.165606	0.099157	0.0839146	0.379483	0.0614085	0.0209213	0.0532057	0.404182	0.0137615	0.284822	0.0498543	0.145519	0.0201435	2.62554	0.149347	0.0110439	0.0152367	0.156515	0.0649964	0.285181	0.37202	0.132647	0.125452	0.342632
RP11-363G10.3	0	0	0	0	0	0	0	0	0	0	0	0	0	0	0	0	0	0	0	0	0	0	0	0	0	0	0	0	0	0	0	0	0	0	0	0	0	0	0	0	0	0	0	0	0	0	0	0	0
STYK1	0	0	0	0.0297677	0.0217597	0.038725	0	0	0	0.0117313	0	0.015043	0	0	0.0515863	0	0.0514343	0.0405396	0	0.0438189	0.0265457	0.0410028	0.0314854	0.0104302	0	0	0.0216639	0.0163694	0.0334314	0.0152462	0	0	0	0	0	0.0272306	0.0611409	0	0.368499	0.0509835	0	0	0.0178102	0.0322738	0.0155767	0.0829381	0.0483015	0	0.0431877
CD80	0.020736	0.0160955	0.0417507	0.0318415	0.0698269	0.0138076	0.118804	0.0789171	0	0.0125486	0.0510802	0.016091	0.265812	0.0170871	0.0919668	0	0	0.072273	0.0795568	0.187486	0.141975	0.0292395	0.0673577	0.0669413	0.38535	0.0411727	0.104279	0.122569	0.0357605	0.0489249	0.427817	0	0.0259501	0.0134003	0.26194	0.0436915	0.11445	0	0.886885	0.181784	0.0161311	0.0111277	0.152408	0.0345222	0.0666473	0.066537	0.129166	0	0.0461964
ENSG00000232527	4.82591	0.245634	0.584062	0.121484	1.15443	0.0526795	0.0755446	1.20436	1.77	0	0.194884	0.429739	0.276583	0.130383	0.701754	0	0.209906	0.055148	0.121412	0.059609	0.216669	0.167334	0.0642467	0.0425664	0.951312	0.35344	0.132617	0	0.272871	0.124441	0.466352	0.169428	0.247515	0.255628	0.117573	0.333388	0.0623797	0.149672	0.438627	0.277421	0.430809	0.212275	0.218053	0.131711	0.190707	0.507712	0.197121	0.532652	0.0587503
ENSG00000266970	0.055872	0.0433684	0.0374983	0	0	0.855688	0.0533518	0	0	0.135246	0.275266	0	0.781325	0	0.0495599	0.661367	0.197656	0.194736	0.171489	0	0.229526	0.0787842	0	0	0.122153	0.0832032	0.124878	0	0	0.307592	0.164676	0	0.069921	0.144426	0.788815	0.0392414	0.0440544	0.105702	1.54885	0.0979615	0.0434643	0	0	0.139527	0	0.17928	0.382834	0.846393	0.124474
FAM132A	0.184994	0.775409	0.422139	0.3977	0.207651	2.78394	0.282639	1.65452	0.146078	0.0895608	0.0303805	0.68906	0.301816	1.40245	0.984568	0.404273	0.589001	4.02341	0.567806	0.223019	0.253323	0.939087	0.360555	0.338419	1.0718	0.550978	0.661559	0.0624849	0.861391	0.349183	0.654297	0.752748	0.926044	0.21519	0.357404	0.103944	1.25444	0.524977	0.527484	1.07037	0.546865	0.258114	0.339923	0.708369	0.47567	0.831045	1.10625	0.560488	1.53864
ENSG00000254584	0	0	0	0	0	0	0	0	0	0	0	0	0	0.150263	0	0	0	0	0	0	0	0	0	0.0327044	0	0	0	0	0.104825	0	0	0	0	0	0	0	0	0	0.0962867	0	0	0	0	0	0	0	0	0	0
SPRR2F	0	0	0	0	0	0	0	0	0	0	0	0	0	0	0	0	0	0	0.0747904	0	0	0	0	0	0	0	0	0	0.084045	0	0	0	0	0.0629874	0	0	0	0	0	0	0	0	0	0	0	0	0	0	0
ENSG00000248362	0	0	0	0	0	0	0	0	0.110157	0	0.0687296	0.0649524	0	0.0689731	0	0	0.0740274	0	0	0	0	0	0	0	0	0	0	0	0.14435	0	0	0	0	0	0.186589	0.0587879	0.0659982	0	0.132592	0	0	0	0	0	0.0672566	0.0895272	0	0	0
MEI1	0.196925	0.238836	0.107384	0.0566983	0.77365	0.311428	0.0587631	0.152233	0.388747	0.0819299	0.192017	0.162363	0.1004	0.131846	0.141925	0.201724	0.217703	0.111533	0.066109	0.157649	0.48876	0.0607426	0.149925	0.0331107	0.0807259	0.158847	0.0962806	0.0831433	0.392672	0.600144	0.19347	0.131792	0.23874	0.167028	0.301802	0.190175	0.203795	0.0232847	0.175469	0.366852	0.0191491	0.033024	0.407076	0.153679	0.0890062	0.131643	0.252999	0.0621494	0.466135
LTA	0.496769	0.177968	0.307758	0.0586786	0.0428931	0.254451	0	0.0363578	0.352034	0.0462499	0.345152	0.177918	0.133594	0.0944657	0.237271	0.0695898	0.236572	0.239737	0.14661	0.259129	0.418618	0.0808253	0.217226	0.0616808	0.0835454	0.170718	0.106761	0.161338	0.230652	0.360641	0.187713	0.0818368	0.215197	0.0246946	0.454316	0.134193	0.391696	0.0722939	0.272397	0.368498	0.0297269	0.123039	0.351078	0.286284	0.0614099	0.286105	0.618883	0.06432	0.454038
COX4I1P2	0.121346	0.0941895	0.0814406	0	0	0	0	0	0	0	0.199278	0	0	0	0	0	0	0	0	0	0	0	0	0	0.0663247	0	0	0	0	0	0	0	0	0	0	0	0	0	0	0	0	0	0	0	0	0	0.302348	0	0
ERICH4	0.0701649	0.0544626	0	0.107743	0	0	0	0.867859	0.0923412	0	0.0576137	0.21779	0.2453	0	0	0.0638888	0	0	0.0538396	0	0	0	0.22792	0.113255	0.0383505	0.139317	0.0392058	0	0	0.0551827	0.068934	0	0.0439039	0	0	0.0492799	0	0	0.0555735	0.246043	0.054583	0	0.580169	0	0.112758	0.225143	0.0437063	0.0590507	0.0521052
SLC34A3	0	0.0894861	0.0773739	0.0885147	0.355865	0.575746	0.0275214	0.109689	0.0758617	0.174416	0	0.0223653	0.0335871	0	0.102262	0	0	0.0602725	0	0.043432	0.039467	0.0609611	0.0936222	0.0310145	0.0630127	1.88849	0.0805225	0	0.422487	0	0.0566319	0.15431	0	0.0745019	0.428326	0.0202426	0.0681762	0	0.867459	0	0	0.0463999	0.132397	0.071975	0.115793	0.0308272	0	0	0.171225
ENSG00000251320	0	0	0.150246	0	0	0	0.106883	0	0	0	0	0.0868588	0	0	0	0	0.0989945	0.0780256	0.0858891	0	0	0	0	0	0.0611797	0	0.0625442	0.0945176	0	0	0	0	0	0	0.998079	0	0	0.105881	0.17731	0	0	0	0	0	0.0899401	0	0	0	0
GPAT2	0.0934215	0.598246	0.634833	0.502092	0.563639	0.513208	0.267622	0.433319	0.384213	0.11307	0.201364	0.335286	0.4763	0.827556	0.0621504	0.20203	0.227214	0.374451	0.510756	0.184773	0.431755	1.39142	0.303465	0.10053	0.587214	0.643434	0.535058	0.059165	0.453124	0.183683	0.183565	0.275098	0.153447	0.0754652	0.824342	0.410088	0.138116	0.110463	0.12024	0.19451	0.245278	0.0501332	0.622268	0.874869	0.375331	0.886813	0.101838	0.294838	0.74579
MS4A4A	1.79967	0.719002	2.46897	2.76351	1.84184	1.6213	2.77991	1.71229	5.53804	2.75474	5.04171	1.19116	1.4804	1.26489	2.15977	0.819346	2.34066	4.0956	4.44743	4.56648	3.6241	1.26884	1.35402	1.06798	5.85855	5.50455	3.53437	2.30185	6.04752	1.56109	5.3563	1.70036	3.97446	2.34312	6.11605	3.62467	1.39815	1.30181	5.1776	4.57068	1.95589	2.45702	2.30993	4.78065	4.12555	3.73658	2.04423	7.23889	9.90547
S100P	9.28227	1.24779	2.71465	2.787	5.41327	0.656066	12.7259	25.1134	15.6966	0.188288	0.553542	0.12072	1.08775	3.11936	14.8113	0.330525	0.59621	0.0361478	325.966	0.195359	0	0.584973	0.0842234	2.67849	207.446	0.669266	51.4605	0.0875765	32.4181	0.938019	0.203786	0.166583	8.5013	0.603203	3.04407	1.34757	34.4685	0	2.21791	0.0909205	0.403403	4.48029	0.142927	0.129499	0	3.27243	1.19516	6.41539	0.500617
ENSG00000248828	0	0	0	0	0	0	0	0	0	0	0	0	0	0	0	0	0	0	0	0	0	0	0	0	0	0	0	0	0	0	0	0	0	0	0	0	0	0	0	0	0	0	0	0	0	0.0853306	0	0	0
TRAT1	0.420101	0.101902	0.123353	0.282228	0.176832	0.0524503	0.025072	0.0249816	0	0.0476677	0.452751	0.0203747	0.0917933	0.10818	0.18632	0.0717232	0.139328	0.27454	0.543976	0.197832	0.50336	0.092559	0.149257	0.014127	0.0287022	0.234602	0.0586846	0.0443425	0.701849	0.103249	0.206366	0.0281152	0.197151	0.0509032	0.390203	0.350378	0.476164	0.0745102	0.166369	0.552428	0	0.0704503	0.361841	0.437127	0.210975	0.168501	0.408882	0.132584	0.389964
ENSG00000261634	0	0.0962022	0.147877	0.0211462	0	0.275092	0	0.117921	0	0.0166672	0	0	0.0320959	0	0.0122152	0.0125392	0	0	0.0422674	0	0	0	0.0111832	0.00740937	0.0602151	0.0136716	0.0846422	0	0.0118744	0	0	0	0.00861682	0	0.0920945	0	0.0434328	0	0.0872574	0	0	0	0	0	0	0.0883756	0.0428902	0	0.66472
AP001342.1	0	0	0	0	0	0	0	0	0	0	0	0	0	0	0	0	0	0	0	0	0	0	0	0	0	0	0	0	0	0	0	0	0	0	0	0	0	0	0	0	0	0	0	0	0	0	0	0	0
GPR132	0.347684	0.110404	0.137887	0.315481	0.0177393	0.199944	0.0754546	0.436059	0.353579	0.0860743	0.350374	0.0735818	0.257837	0.208364	0.378496	0.100731	0.209656	0.264395	0.460816	0.285782	1.03877	0.122566	0.179677	0.00850314	0.34552	0.203967	0.203105	0.226865	0.558719	0.186439	0.201845	0.135381	0.514219	0.0612778	0.939461	0.266393	0.548288	0.0747467	3.0417	1.05295	0.0368825	0.152656	0.493666	0.236798	0.177782	0.354975	0.492216	0.186206	0.751109
RP11-811I15.1	0	0	0	0	0	0	0	0	0	0	0	0	0	0	0	0	0	0	0	0	0	0	0	0	0	0	0	0	0	0	0	0	0	0	0	0	0	0	0	0	0	0	0.0849335	0	0	0	0	0	0
KCNA10	0	0	0	0	0	0	0	0	0	0	0	0	0	0	0	0	0	0	0	0	0	0	0	0	0	0	0	0	0	0	0	0	0	0	0	0	0	0	0	0	0	0	0	0	0	0	0	0	0
ENSG00000223946	0	0	0	0	0	0	0	0	0	0	0	0	0	0	0	0	0	0	0	0	0	0	0	0	0	0	0	0	0	0	0	0	0	0	0	0	0	0	0	0	0	0	0	0	0	0	0	0	0
ENSG00000251194	0	0	0	0	0	0	0	0	0	0	0	0.0731637	0.329621	0	0	0	0	0.0657232	0	0	0.258217	0.0664742	0	0	0.0515335	0	0	0	0	0	0.0926301	0.100959	0.176988	0	0.0700592	0	0	0.0891864	0	0.082655	0	0.0505961	0	0	0.0757592	0	0.117461	0	0
MX2	0.493483	0.497565	0.344857	0.289048	0.1085	0.301497	0.247756	0.367875	0.569108	0.507988	0.267354	0.422417	0.142288	0.142535	3.31232	0.125075	0.265465	0.418469	0.191284	0.873973	0.578223	0.304883	0.165258	0.139601	0.539453	0.275265	0.329753	1.50787	1.17128	0.304086	2.05926	0.386782	1.13327	0.115069	0.710698	0.321583	0.938665	0.375366	0.527861	0.691294	0.241417	0.171997	1.14047	0.368437	0.478281	0.370021	5.95141	0.124166	1.26941
EPN3	0	0.377367	0.345482	0	0.0481508	0.35229	0.013654	0.108838	0.0376367	0.0605722	0.0234824	0.0110959	0.0666533	0.0706967	0.088785	0	0	0.0897075	0.010972	0.0107738	0.117483	0.131058	0.011612	0.0461609	0.0703396	0.0567833	0.183766	0.0241486	0.0246595	0.0562288	0.0561927	0.137802	0	0.036962	0.0531255	0.0401713	0.0563729	0.0405777	16.1953	0.0250707	0	0.0383667	0.0262741	0.0476112	0.0114895	0.0611762	0.0712557	0.0361021	0.0318558
PKMP5	0	0.0965427	0	0	0.0465367	0	0	0	0	0	0	0	0	0	0	0	0	0	0	0	0	0	0	0	0	0	0	0	0.0357493	0	0	0	0	0	0.0308068	0	0	0	0.0328373	0	0	0	0	0	0	0.0443442	0.0774756	0	0
RP11-191L9.5	0	0.0696238	0	0	0	0	0	0	0	0	0	0	0	0	0	0	0	0.0625259	0	0	0	0	0	0	0	0	0	0	0	0	0	0	0	0	0	0	0	0	0	0	0	0	0	0.149332	0	0	0	0	0
ENSG00000255429	0	0	0	0	0.322534	0	0	0	0	0	0	0	0	0	0	0	0	0	1.32292	0	0	0	0	0	0.314109	0	0	0	0	0	0	0	0	0	0	0	0	0	0	0	0	0	0	0	0	0	0.536963	0	0
TMPRSS7	0.0217626	0	0	0.0334179	0	0.0144912	0	0.020706	0	0	0.0178697	0	0	0	0.038608	0	0	0	0	0	0	0	0.0176731	0	0.0356848	0	0	0	0	0.0171157	0	0	0	0.0843825	0.0970263	0	0	0	0.293027	0	0	0	0	0	0	0	0	0	0
ENSG00000258028	0.268729	0.556239	0.661307	0	1.10602	0	0	0.0852273	0.117888	0	0.0735528	0.486573	0	0	0	0	0.0792223	0	0	0	0	0	0	0.144588	0	0	0	0.529477	0	0.493144	0	0	0	0	0	0	0	0	0	0	0	0	0	0.820217	0	1.62877	3.40366	0	0
ENSG00000254248	0.083597	0.129777	0	0	0	0	0	0.159077	0	0	0	0	0.0974196	0	0	0	0	0	0.128293	0	0	0	0.0678879	0	0.0456922	0.0414968	0	0	0.144168	0	0	0	0.0523087	0	0	0	0.0659151	0	0	0	0	0.044861	0	0.0695879	0.0671719	0.0894144	0.104146	0	0
ENSG00000251680	0	0	0	0	0	0	0	0	0	0	0.0618645	0	0	0	0	0	0	0	0	0	0	0	0	0	0	0	0	0.0636197	0	0	0	0	0	0	0	0	0	0	0	0	0	0	0	0	0	0	0	0	0
BPIFB1	0	0	0.0143657	0.0657367	0	0.128276	0.0204392	0.264752	0	0	0	0	0.0249439	0.0352761	0	0	0	0.0298414	0.279216	0	0	0	0	0.184267	0	0	0.0239205	0	0.129198	0.0168342	0	0	0.0133934	0	1.5746	0	0.050632	0	0.118674	0.0187646	0.0166513	0	0.0196653	0	0	0	0.0399995	0.0180142	0
LGALS9	5.9592	14.03	8.80202	4.067	2.13841	3.58907	1.81915	2.9731	4.00542	2.8119	6.90582	3.04681	3.11354	4.59467	4.05978	3.49051	4.74643	4.18641	3.31585	11.8422	7.84214	3.94759	3.30172	2.51255	5.30162	4.49193	4.44623	4.66911	7.9832	3.88278	7.50949	2.03996	3.14006	1.53892	11.7996	1.94993	5.42234	6.23038	22.1184	9.55222	1.58142	2.57454	6.38211	3.41341	3.14556	7.40515	6.07095	5.26944	9.91179
ENSG00000258693	0	0	0	0	0	0	0	0	0	0	0	0	0	0	0	0	0	0	0	0	0	0	0	0	0	0	0	0	0	0	0	0	0	0	0	0	0.135587	0.162661	0	0	0	0	0	0	0	0	0	0	0
OR7E59P	0	0.0515216	0	0	0	0	0	0	0	0	0	0	0	0	0	0	0	0	0	0	0	0	0	0	0	0	0	0	0	0	0.0652116	0	0	0	0	0	0	0	0	0	0	0	0	0	0.0533345	0	0	0	0
ENSG00000231728	0.10126	0.078599	0.0339802	0.0777458	0	0.0337133	0	0.048172	0	0	0.0415733	0.0392885	0	0.0417206	0.0449101	0	0.0447778	0	0	0.0762959	0	0	0	0	0.110693	0.0251323	0.0282904	0	0.0873145	0	0.0994838	0	0	0	0.0752429	0	0	0	0	0.0887706	0	0	0	0.0421455	0.0813646	0	0.0315378	0.0426102	0
ENSG00000250192	0	0	0	0	0	0	0	0	0	0	0	0	0	0	0	0.107926	0	0	0	0	0	0	0	0	0	0	0	0	0	0	0	0	0	0	0	0	0	0	0	0	0	0	0	0	0	0	0	0	0
TAGAP	0.941503	0.403202	0.272365	0.648091	0.255093	0.205372	0.155006	0.185337	0.19227	0.117881	0.679783	0.176352	0.321587	0.334407	0.66235	0.0739041	0.315843	0.486567	1.39506	1.12524	1.06697	0.537906	0.105459	0.113542	0.417007	0.717147	0.417236	0.260438	1.0218	0.280866	0.542234	0.225967	0.863368	0.335687	1.09765	0.490244	0.844758	0.184262	2.71284	1.32345	0.0883954	0.313599	0.909737	0.675627	0.417389	0.295162	0.525801	0.136615	0.976428
MIR210HG	0.314578	3.4185	1.95773	0.131742	3.75576	2.68502	3.38619	3.02026	0.414004	1.31528	0.727954	1.42028	1.26641	1.97951	1.04005	3.33312	2.93392	0.538245	0.394994	0.258571	2.66294	0.564558	0.859289	2.6004	0.953492	2.48427	0.783001	1.06254	0.419211	2.63151	1.5172	1.53113	1.18104	1.7557	4.18629	2.85216	1.2402	11.6593	10.6912	1.10311	0.956626	0.352974	0.367838	1.19028	0.321707	3.48705	4.07939	2.4068	1.42289
FUNDC2P4	0	0	0	0	0	0	0	0	0	0	0	0	0	0	0	0	0	0	0	0	0	0	0	0	0	0	0	0	0	0.123997	0	0	0	0	0	0	0	0	0	0.138216	0	0	0	0	0	0	0	0	0
GCNT1	0.492967	0.0558025	0.889169	0.205016	0.288199	0.170966	0.0980688	0.488577	0.0946129	0.118086	0.379486	0.135482	0.0598415	0.330053	0.218637	0.056109	0.199827	0.70159	0.165492	0.278575	0.210953	0.311358	0.183485	0.10499	0.415394	0.46392	0.315624	0.138756	0.318807	0.210007	0.514589	0.164959	0.379151	0.484495	0.755508	0.447217	0.178153	0.155438	0.227763	0.504192	0.13582	0.407838	0.651056	0.316317	0.165046	0.373485	0.179126	0.198797	0.282189
KLHL30	0.0178143	0.359518	0.083692	0.10942	0.119976	0.0948967	0.0170107	0.0508482	0.0937786	0.118585	0.0877658	0.304122	0.0207598	0.0880767	0.110612	0.0162208	0.141796	0.124179	0.123025	0.0671121	0.0487882	0.113038	0.0868003	0	0.379738	0.0530571	0.119448	0.0601706	0.138248	0	0.0175018	0.0763019	0.100321	0.0345366	0.330929	0.125117	0.154509	0.101107	0.225754	0.156171	0.0415745	0.0286793	0.0818334	0.059316	0.0572565	0.019054	0.687992	0.0899548	0.105833
ENSG00000269741	0	0	0	0	0	0	0	0	0	0	0	0	0	0	0	0.0312668	0	0	0	0	0	0	0	0	0	0	0	0	0	0	0	0	0	0	0	0	0	0	0	0	0	0	0	0	0	0	0	0	0
NPFFR1	0.00744042	0	0.00499361	0	0	0.00495439	0	0.00707919	0.00979204	0	0	0	0	0	0	0.0135498	0.0065804	0	0.00570925	0	0.0305658	0	0	0	0.0162671	0.0147734	0	0.00628281	0.0128314	0.0117034	0	0	0.00465565	0.00480826	0	0.00522573	0	0	0.0530381	0	0	0	0	0.00619357	0	0.00795819	0	0.0125237	0.00552534
ENSG00000248599	0	0	0	0	0	0	0	0	0	0	0	0	0	0	0	0	0	0	0	0	0	0.0240235	0	0	0	0	0	0	0	0	0	0	0.0426418	0	0.0506383	0.0239316	0	0.0322316	0	0	0	0	0	0	0.0273791	0	0	0	0
C1orf143	0	0	0	0	0	0	0	0	0	0	0.0543396	0	0	0	0.058701	0	0.0585281	0	0	0	0	0.0466578	0	0	0.0361711	0	0	0	0	0	0	0	0	0.0427661	0.0491742	0	0	0	0	0.0580151	0	0.0355131	0	0	0	0.0707827	0	0.11139	0
UNC13A	0.0177634	0.0965169	0.0437135	0.8274	0.019939	0.149824	0.0226162	0.135208	0	0.00358323	0.00972392	0.00459476	0	0.0146376	0.0105044	0.0269575	0.0366571	0.961705	0.00454346	0.00892274	0.0162163	0.0417465	0	0.0286725	0.0776726	0.014696	0.00661707	0	0.903705	0.0372545	0.00581727	0	0	0.286983	0.114395	0.0457455	0.0933748	1.27703	0.286077	0.0207633	0	0.00953247	0.0326399	0	0.019031	0.0316659	0.287689	0.00996645	0.189075
NBL1	0.574684	0.505551	2.26276	0.58831	0.430045	1.55618	1.18898	1.00244	0.907582	3.60527	0.739285	1.10001	0.714354	1.48381	1.20643	1.1861	2.25327	1.89617	0.955439	0.447437	1.18042	3.82216	7.48263	0.463807	3.16203	0.912858	2.69736	0.663205	2.97323	0.828616	18.933	19.5483	1.98975	0.532312	2.64757	0.820706	1.16304	1.21407	40.1311	1.47782	0.87922	0.524272	0.492786	1.56271	1.89326	1.27033	0.9546	1.27362	1.73552
ENSG00000224149	0	0	0	0	0	0	0	0	0	0	0	0	0	0	0	0	0	0	0	0	0	0	0	0	0	0	0.0336711	0	0	0	0	0	0	0	0	0	0	0	0	0	0	0	0	0	0	0.0322265	0.431666	0	0
LBP	346.096	130.735	218.946	150.262	146.541	94.2563	306.858	39.7406	699.952	146.272	1053.67	166.079	1499.57	200.402	134.928	656.567	805.178	737.924	1322.78	1053.16	228.923	59.0402	81.8302	249.81	763.37	369.339	668.296	120.387	437.651	788.5	0.432305	39.1802	2546.22	687.405	380.841	1103.04	44.1965	58.6569	6.70226	161.185	828.065	430.633	180.272	351.55	143.93	438.46	834.323	622.771	319.402
NR2E1	0	0.041405	0.0358007	0	0	0.165758	0	0.0169176	0	0	0.189803	0.0137978	0.0621627	0	0	0	0	0	0.0818627	0.0803835	0	0.0125363	0	0.00956688	0.00971861	0.0882627	0.0298061	0	0	0	0	0	0	0.0459624	0.0264247	0.0124883	0	0	0	0	0.248979	0.0190837	0.114352	0	0.0571492	0.285273	0.0443034	0	0
ENSG00000236780	0	0.0184798	0	0	0	0	0	0.0679556	0	0	0	0	0	0	0.422361	0	0	0	0	0	0	0	0	0.0128096	0.0260255	0.011818	0.013303	0	0	0.0187241	0	0	0	0	0.0353814	0	0.0187721	0	0.0754269	0	0.0555619	0	0	0	0	0	0.0296601	0	0
FAM27C	0.215506	0.167278	0.144636	0	0.12095	0.215251	0.102893	0.410087	0	0	0.442391	0.167231	0	0.0887917	0.0955798	0	0.190596	0.0751123	0.0826822	0	0.147553	0.0759705	0	0	0.235582	0.0534878	0	0	0.371653	0	0	0.346146	0.134848	0	0.240203	0	0.084962	0.101927	0.17069	0.0944629	0.251472	0.0578241	0	0	0	0.576258	0	0	0
FCHO1	0.349715	0.0904841	0.187768	0.179004	0.0654244	0.155245	0.0779194	10.5145	0.0613662	0.0705444	0.172295	0.0995047	0.163016	0.326599	0.144763	0.0955302	0.185576	0.316912	0.169953	0.324981	0.462923	0.172595	0.0567998	0.0188162	0.388664	0.144663	0.182382	0.0885916	0.351811	0.293377	0.137432	0.0998598	0.204237	0.0451996	0.537047	0.171934	0.35847	0.0882153	0.480115	0.408775	0.0634789	0.118857	0.406976	0.135852	0.0936679	0.174558	0.595431	0.107917	0.614629
ENSG00000236003	0	0	0	0	0	0	0	0	0	0	0	0	0	0	0	0	0	0	0	0	0	0	0	0	0	0	0	0	0	0	0	0	0.063701	0	0	0	0	0	0	0	0	0	0	0	0	0	0	0	0
LST1	5.09241	1.33265	3.71071	1.83205	1.27387	2.80961	0.80582	1.16284	3.79137	1.21508	4.37263	1.53551	5.5275	7.09773	2.73607	2.43769	2.75375	6.32879	2.99207	4.53857	8.48755	2.74919	4.56084	0.908095	4.73973	1.80559	2.27638	1.86748	5.06856	2.21994	5.94652	0.841312	4.24253	1.07189	3.45966	2.02335	3.23519	1.62405	7.02965	17.2705	0.452745	3.59164	6.89759	2.90677	1.96409	4.73093	2.35642	5.92661	6.35322
FCRL5	0.0106894	0.0497834	0	0	0	0.0142357	0	0.0254261	0	0	0.0263319	0.0290322	0.00622845	0.0176168	0.00948179	0	0	0.0260797	0.00820231	0	0.12442	0.0113047	0.00434036	0.00287569	0	0	0.0119458	0.0496448	0.0368691	0.290039	0.00525096	0	0.107018	0	0.0834009	0.00375383	0.0252854	0	0.00423324	0.0374839	0.00415779	0.0143408	0.0147312	0.0355924	0.00429459	0.0400165	0.0366219	0	0.170669
CACNG8	0.0151769	0.0589021	0.0356506	0.0349576	0.042589	0.0303177	0	0.16606	0.00998683	0	0.024924	0.0294428	0.0176863	0.0125062	0.0269245	0.0276386	0.0067113	0.0423177	0.0116456	0	0.0519563	0.0321009	0.0739494	0.0204145	0.0746579	0.0489688	0.0678426	0.0192234	0.0261734	0.00596808	0.0223659	0.0406284	0.00949653	0.0147117	0.30449	0.00532969	0.0777839	0	0.0901553	0.0399148	0.0118065	0.00814443	0.00697179	0.0252671	0.0304873	0.032466	0.00945378	0.00638641	0.0112705
BNIP3P31	0	0	0.0787068	0	0.131635	0	0	0	0	0	0	0	0	0	0	0	0	0	0	0	0	0	0	0	0	0	0	0	0	0	0	0	0	0	0	0	0	0	0	0	0	0	0	0	0	0	0.0730497	0	0
HILPDA	3.4631	2.28985	5.10043	3.29901	5.039	3.65115	3.58245	9.15267	6.87866	3.76454	4.871	3.50846	20.1412	1.9553	2.98652	6.36505	1.61648	5.52101	3.86298	2.05363	4.96176	5.76495	2.13529	2.91571	4.57438	6.11218	1.77381	1.75999	1.68662	1.84097	4.25293	6.93585	2.88926	4.68316	11.294	3.69347	4.44987	7.21902	24.4323	2.30508	1.74613	1.5831	4.50738	2.00191	2.49925	3.77268	3.61529	3.80509	3.2861
ENSG00000259123	0	0.116565	0.40315	0	0.337128	0	0	0	0	0	0	0	0.175003	0	0	0	0	0	0	0	0	0	0	0	0	0	0	0	0	0	0	0	0	0	0	0	0	0	0	0	0	0	0	0	0	0	0	0	0
YPEL4	0.0744125	0.138623	0.289662	0.114265	0.116937	0.099099	0.0568447	0.18408	0.117518	0.0180126	0.0733219	0.0692923	0.0520299	0.0490544	0.11881	0	0.131623	0.103743	0.148457	0.0784941	0.224174	0.0734495	0.0362576	0.0560521	0.187092	0.0738755	0.282739	0.0879692	0.128329	0.128751	0.0731072	0.159362	0.167622	0.125029	0.475523	0.0940738	0.129081	0	0.223964	0.16961	0.0578874	0.0559053	0.21877	0.0619426	0.119584	0.143264	0.333735	0.0751506	0.121571
ZBED2	0.0861653	0.0668823	0.0963826	0	0	0	0	0.081982	0	0.0173812	0.047168	0	0.0334709	0	0.152861	0	0	0.16017	0.022039	0.0865633	0.196652	0.02025	0.0932981	0	0.0156987	0.0285145	0.0160488	0.121266	0.0495324	0.677665	0	0	0	0.037122	0.0213422	0.0201726	0.0226467	0	0.113744	0.0755376	0	0.0308262	0.0263878	0.0717259	0	0	0.304147	0	0.23462
RP11-123C21.3	0	0	0	0	0	0	0	0	0	0	0	0	0	0	0	0	0	0.0695777	0	0	0	0	0	0	0	0	0	0	0	0	0	0	0	0	0	0	0	0	0.0790565	0.0875025	0	0	0.0917026	0	0	0	0	0	0
ENSG00000248215	0.0816433	0	0.0821919	0	0.0458212	0	0	0	0	0	0.134078	0	0.0475714	0	0	0	0.0361031	0	0	0	0	0	0	0	0	0	0	0	0	0.0321051	0	0	0	0	0.0303332	0	0	0	0	0	0	0	0	0	0.032801	0.0873248	6.76388	0	0
ENSG00000264448	0	0	0	0	0	0.0931467	0	0.0665473	0.0920493	0	0	0	0	0	0	0.127374	0.0618585	0	0	0	0	0	0	0	0	0.0347192	0	0	0.0603105	0	0	0	0	0	0.0519723	0	0	0	0	0.122633	0	0	0	0	0	0	0.0435681	0.058864	0
IL18	0.985032	1.15669	1.06793	0.387841	0.226804	0.840908	0.602948	0.793023	0.831001	0.886509	3.42197	0.274392	1.55997	0.874132	0.985767	0.22998	0.804161	1.35568	2.01558	2.3788	3.52779	0.498607	1.08708	0.557169	1.31148	1.78032	1.3125	1.36497	1.91653	0.893884	1.14145	0.35159	1.86488	0.293798	1.93308	0.869224	0.955919	1.09902	3.20076	3.25487	0.275075	0.921666	1.80997	1.76607	0.466778	1.75597	0.707982	1.84931	2.28827
YBX3	3.74666	2.41152	3.24409	2.95949	1.24608	4.23501	3.30528	2.32516	3.09445	1.14299	7.69746	2.23138	6.32465	2.13446	1.79845	1.37584	2.48178	6.19609	3.3245	2.13756	2.3119	2.52197	3.36189	1.01208	4.36956	2.24631	5.51807	2.31747	3.23731	1.26111	2.97656	1.8326	18.2678	3.14858	6.39865	1.72181	3.42224	1.02093	23.5386	3.84548	1.22942	0.860498	6.89857	3.3434	3.19635	2.01194	2.13213	0.934276	5.07227
ENSG00000229588	0	0	0	0	0	0.104487	0	0.149299	0	0.379839	0	0	0.182863	0	0	0	0	0	0	0	0	0	0	0	0	0	0	0	0.405919	0.123411	0	0	0	0	0	0	0	0	0	0	0	0	0	0	0	0	0	0.132061	0.116528
ENSG00000278456	0	0	0.0701544	0	0	0	0	0	0	0	0	0	0	0	0	0	0	0	0	0	0	0	0	0	0	0	0	0	0	0	0	0	0.0654064	0	0.233016	0.146831	0	0	0.248374	0	0	0	0	0	0	0	0	0	0
ENSG00000237416	0	0	0.0471408	0	0.0788416	0.0467705	0	0	0.0924389	0.0425058	0	0	0	0	0	0	0	0	0	0	0	0	0.0570402	0	0.0383911	0	0	0	0	0	0	0.0752119	0	0	0	0	0	0	0.166897	0	0	0	0	0	0	0	0.0437525	0	0
SPOCD1	0.0843167	0.0581755	0.0754519	0.0719299	0.0315477	0.0561444	0.0178919	0.0891368	0.0123295	0.0226778	0.0384634	0.0363495	0	0.00771992	0.0249303	0	0.0248569	0	0.0215662	0.112942	0.128289	0.0132104	0.0760804	0.0352847	0.0102412	0.0186018	0.0889919	0	0.0403914	0.0589446	0.0276125	0.0300954	0.0234485	0.024217	0.167074	0.0526394	0.140352	0.026586	0.652983	0.041065	0.0437281	0.010055	0.0860723	0	0.0451668	0.190389	0.0291786	0.0315381	0.00695716
SYCP2	0.0615923	0.135457	0.0620062	0.141869	0.0576131	0.116203	0.058814	0.107437	0.175628	0.155305	0.0590037	0.270839	0.13159	0.109967	0.127479	0.0186943	0.0272365	0.114492	0.141785	0.0077346	0.154627	0.224363	0.1834	0.0276161	0.095384	0.0407652	0.258118	0.0520095	0.221291	0	0.0806825	0.0659529	0.147736	0.0398031	1.28911	0.346072	0.153788	0.0776829	0.13009	0.071994	0.0479142	0.0330526	0.0660185	0.264899	0.148472	0.0329392	0.0831271	0.0172787	0.16771
ENSG00000257202	0.117688	0	0	0	0	0	0	0	0.154884	0	0	0	0	0.0969781	0	0	0	0	0	0.0886736	0	0	0	0.0633212	0	0	0	0	0	0	0.115623	0.12602	0	0	0	0	0.0927953	0	0	0	0	0	0	0	0	0	0.0733087	0	0
ENSG00000272839	0.215157	0	0	0	0	0.0716339	0	0.102356	0	0.195306	0.17667	0	0.501466	0.177295	0.19085	0.0979559	0	0.224972	0.165096	0.24317	0.147314	0.0758474	0.174726	0.115764	0	0	0.0601113	0	0	0	0	0	0	0	0.159876	0.0755572	0	0	0.170413	0.0943098	0	0.0577304	0.197673	0	0	0.23013	0.0670115	0	0.239667
SIGLEC12	0.452358	0.0234083	0.303599	0.833551	1.55713	0.4217	0.172781	0.803406	0.436575	0.109499	0.420965	0.421232	0.351436	0.298204	0.107001	0.0549194	0.400071	0.588613	0.555372	0.136334	0.660736	0	0	0.0486777	0.115383	0.0748489	0.20221	0.127326	0.156024	0.142307	0.444423	0.29063	0.132091	0.56517	0.851533	0.677783	0.237785	0.0570534	0.143315	0.951753	0.16422	0.436952	0.387892	0.0753105	0.0484639	0.129023	0.262992	0.812168	2.7098
CPXM1	0.277608	1.61611	1.90042	2.21668	0.124643	1.95943	0.636205	3.06391	0.255744	0.403192	0.136769	0.193879	0.355861	0.869274	0.123122	2.32554	2.60251	1.52876	0.766859	1.08767	1.78668	0.822045	0.563603	0.0746825	2.95881	0.923274	0.977242	0.398508	5.00294	1.50648	0.409107	0.505345	0.364782	0.556139	2.88793	0.214474	0.788004	0.262598	3.34213	1.28985	0.0647874	0.253256	0.331564	0.115543	0.156144	0.68293	1.00296	0.81772	1.13385
ENSG00000258234	0	0	0	0	0	0	0	0	0	0	0	0	0	0	0	0	0	0	0	0	0	0	0	0	0	0	0	0	0	0	0	0	0	0	0	0	0	0	0	0	0	0	0	0	0	0	0	0	0
ENSG00000261055	0	0	0	0	0	0	0	0.0334322	0.0462439	0.0637925	0	0	0.0409482	0	0	0.0319951	0	0	0	0	0	0	0	0.0378117	0.0192057	0	0	0	0	0	0	0	0	0	0	0	0	0	0	0	0	0	0	0	0	0.0375834	0	0	0
TLR7	0.0891979	0.089018	0.102626	0.19567	0.0429095	0.0763646	0.0486711	0.121239	0.11739	0.208204	0.115095	0.0395525	0.029699	0.0735016	0.135636	0.0812193	0.169045	0.151003	0.400887	0.912101	0.19194	0.0808563	0.0517402	0.0342803	0.550218	0.196084	0.106802	0.0753201	0.296666	0.06013	0.0876332	0.136447	0.07176	0.0494081	0.511302	0.152144	0.170805	0.0723216	1.57445	0.268101	0.0892148	0.0410286	0.515112	0.0212144	0.348123	0.517913	0.111124	0.214482	0.302808
P2RX1	0.250791	0.220622	0.0785482	0.20539	0	0.122463	0.0478956	0.827199	0.0440074	0.0101179	0.0823717	0.129741	0.194839	0.371986	0.252119	0.0456716	0.192229	0.163166	0.0769757	0.125975	0.206053	0.471515	0.108621	0.0449788	0.255876	0.13279	0.214871	0.0423544	0.475754	0.302434	0.0821305	0.537093	0.136002	0.0324139	0.819958	0.0939421	0.158196	0.0158154	0.0794548	0.190544	0.0650322	0.0897221	0.184329	0.0278352	0.228384	0.232477	0.166634	0.042213	0.595968
CATSPERD	0	0	0.0162525	0	0	0.0161248	0	0	0	0	0.0198842	0	0	0.0399093	0	0.0220499	0	0	0	0	0	0	0.0786617	0	0.0132359	0.0961649	0.0135311	0	0.0208809	0	0	0	0	0.0312984	0	0	0	0	0	0	0	0.0129951	0	0	0	0	0	0	0.017983
C5orf30	1.30222	4.99621	1.33594	0.342796	2.21344	0.346846	4.06795	0.353999	1.0038	0.135094	8.50839	0.274282	1.9728	0.168625	0.957084	0.0846956	1.10234	1.37459	0.0999231	0.126151	0.229269	0.511523	0.181288	2.10195	1.65739	1.3667	0.343029	0.157088	0.384986	0.951004	0.219322	0.159362	0.232809	0.468857	2.55732	0.24825	0.425381	1.07344	23.2068	0.684962	0.463099	0.219628	2.06806	0.263256	0.29896	1.7709	3.56912	1.40907	0.524966
CARSP2	0	0	0	0	0	0	0	0	0	0	0	0	0	0	0	0	0	0	0	0	0	0	0	0	0	0	0	0	0	0	0	0	0	0	0	0	0	0	0	0	0	0	0	0	0	0	0	0	0
ENSG00000228482	0	0.0552807	0	0	0	0	0	0	0	0	0.0584792	0	0	0	0	0	0	0	0	0	0	0	0	0	0	0	0	0	0	0	0	0	0	0	0	0	0	0	0	0	0	0	0	0	0	0	0	0	0
ENSG00000236457	0	0	0	0.315556	0	0	0	0	0	0	0	0	0	0	0	0	0	0	0	0	0	0	0	0	0	0	0	0	0	0	0	0	0	0	0	0	0	0	0	0	0	0	0	0	0	0.219799	0.128007	0	0
SLCO6A1	0.112425	0	0.0452724	0	0.0757167	0	0	0	0.384692	0	0	0	0	0	0	0	0.0198861	0	0	0	0	0	0	0.012098	0	0	0	0.0189868	0	0.689671	0	0	0	0	0	0	0	0.233963	0.0178091	0	0	0	0	0	0	0.577195	8.03952	0	0
ENSG00000244040	0.0179929	0.0139663	0	0	0.0201966	0	0	0.188313	0	0	0	0	0	0	0	0	0	0	0	0	0	0	0	0	0	0.0178631	0	0	0	0	0	0	0	0	0.0401098	0	0	0	0.0142512	0	0	0	0.0661233	0	0	0	0.0560397	0	0
IL1B	0.407346	0.0332827	0.460445	0.197529	0.09626	0.0856553	0.0409444	0.0407968	0.0564307	0.0259483	0.0528126	0.0998202	0.674574	0.300331	0.0950858	0.0195216	0.265456	0.283952	0.115157	0.403843	0.14679	0.347658	0.0174105	0.173029	0.292955	0.244772	0.239591	0.253451	0.11092	0.0337228	0.126379	0.298443	0.603678	0.0554192	0.318616	0.165635	0.608565	0.121681	0.747155	0.939747	0.0667126	0.253111	0.413639	0	0.654622	0.321037	0.173611	0.144346	0.604999
CXCR3	1.67006	0.855016	0.858527	0.982144	0.358965	0.662499	0.0339304	0.676161	1.30939	0.215032	2.12992	0.468749	0.372677	0.673448	1.10316	0.744161	1.44559	1.33755	0.43625	1.55283	3.40603	0.676414	0.403984	0.191184	0.912816	1.41107	1.48911	0.960153	1.53198	2.0121	0.453828	0.152195	0.911593	0.41333	0.950525	0.973304	0.728453	0.436956	0.619163	3.80036	0.0276422	0.190683	1.43641	0.384522	0.0856549	1.71027	2.6782	0.089714	2.13737
ENSG00000224717	0	0	0	0	0	0	0	0.0218903	0	0	0	0	0	0	0	0.0209493	0	0	0	0	0	0	0	0	0	0.0114206	0	0	0	0	0	0	0	0	0.0170959	0.016159	0	0	0	0	0	0	0	0	0.0184868	0	0.0143314	0	0
ENSG00000235020	0.0268511	0.0208421	0	0	0	0.0178795	0	0.0255475	0.0353377	0	0	0	0	0	0.0238176	0.0488987	0	0.0187173	0	0	0.0367688	0.0378623	0	0	0.0146762	0.0266573	0	0	0	0.0211176	0	0	0	0	0.0399043	0.0188587	0.105859	0	0	0	0	0	0.0246692	0	0.0215754	0	0.0501773	0	0
HLA-DRB9	0.774064	0.150209	0	0.297157	0	0.386573	0	0	0	0	0.1589	0.150167	0.225514	0.159463	0.171654	0	0	0.134896	0.296981	0	0	0	0	0.10412	0	0	0	0.326816	0	0	0.190121	0	0.363263	0	0	0.407744	0.152585	0	0.766364	0.67859	0	0	0.355581	0.322174	0.310988	0.82793	0.120543	0.162863	0.431121
RCVRN	0	0	0	0	0	0	0	0	0	0	0	0	0	0	0	0	0	0	0.0174366	0.0171215	0	0	0	0	0	0.0112799	0	0	0.0195942	0	0	0	0.0142188	0	0.0337704	0	0.0179173	0	0.0719926	0	0	0.0121943	0	0.0189157	0	0	0.0141548	0	0.0168749
ENSG00000229751	0	0	0	0	0	0	0	0.110796	0	0	0	0	0.135704	0.191915	0	0	0	0	0.17871	0	0	0	0	0	0	0	0	0	0.301235	0	0	0	0	0	0.173059	0.0817873	0.0918186	0	0.184465	0	0	0	0	0	0	0	0.217611	0	0.0864763
CASC15	0.089207	0.0784758	0.0997851	0.0913222	0.0066755	0.0277204	0.0227155	0.215019	0.0156536	0.0611823	0.0244165	0.0323045	0.00693048	0.0147018	0.0738536	0.0379062	0.0315583	0.0290193	0.0182536	0.00896191	0.0814375	0.0293508	0.0434662	0	0.247043	0.0560901	0.0631382	0.0100437	0.0461528	0.00935451	0.0175284	0.611345	0.0223276	0.0192162	1.78532	0.0292385	0.103163	0.0337536	0.315596	0.276321	0.38862	0.0255315	0.0382471	0.0148516	0.329727	0.0445269	0.15559	0	0.0397477
AGR2	0	0.0724382	0	0.0358259	0	1.7555	0.245062	0.11099	0	0.324733	0.0191573	0.0181045	0.0271885	0.326828	0.020695	0.0637316	0	0	0.250633	0.0351578	0.51117	1.41463	0	0.175741	0.0255041	0.0694871	0.0260729	0	1.38812	0.018349	0.0229215	0.049965	0.0291972	0.256311	0.104018	0	0.699047	0	1.88485	0.0613594	0.199645	0	0	0	0.0187467	0.149726	4.6796	0.0392702	0
ENSG00000249378	0	0.0160905	0.0139126	0	0.0232684	0	0	0	0	0	0.0340428	0	0	0	0	0.0188753	0	0	0	0.265522	0.0283861	0	0	0.0111534	0	0	0	0	0	0	0	0	0	0	0	0	0.016345	0	0	0	0	0	0	0	0	0.0221721	0.0258252	0	0
LL22NC03-102D1.16	0	0	0	0	0	0	0	0	0	0	0	0	0	0	0	0	0	0.625259	0	0	0	0	0	0.241305	0	0	0	0	0	0	0	0	0	0	0	0.314992	0	0	0	0	0	0	0	0	0	0	0	0	0
ENSG00000236393	0.0425487	0	0.0571129	0.0653364	0	0.0424982	0.0203147	0.080966	0	0.0257487	0.0349376	0	0.024792	0.0175307	0.0754835	0	0.0376306	0	0.0326489	0.0320589	0	0.0449979	0	0	0.162793	0.0105604	0.0475496	0	0.0183444	0.0167317	0.0836046	0	0.0266238	0	0.221315	0.0149419	0.0503236	0	1.43227	0.0186504	0	0	0.0195456	0	0.0170944	0.0455096	0.0265039	0.0179045	0.0473957
ENSG00000254575	0	0	0	0	0	0	0	0	0	0	0	0	0	0	0	0	0	0	0	0	0	0	0	0	0	0	0	0	0	0	0	0	0	0	0	0	0	0	0	0	0	0	0	0	0	0	0.0847257	0	0
ENSG00000255422	0.468536	0	0	0.239823	0	0	0	0.297193	0.411081	0.094513	0.384724	0	0	0.257391	0.554138	0.568836	0.276253	0.326606	0.239681	1.17675	0.213865	0.330338	0	0.168062	0.426819	0	0.0872675	0.13188	0	0.368491	0.613756	0	0.0977249	0.302784	0.696306	0.109691	0	0	0.865901	0.410747	0	0	0	0	0	0	0.291855	0	0.11598
CTC-559E9.13	0	0.0928318	0	0	0.134244	0.159273	0	0.11379	0	0	0	0	0	0	0	0	0	0	0	0	0	0	0	0	0	0.0593666	0	0	0	0	0	0	0	0	0	0	0.0943001	0.11313	0	0	0	0	0	0	0.0960982	0	0	0	0
MEFV	0.0550952	0.106914	0.443724	0.0634518	0.0773037	0.0642015	0	0.117946	0.145017	0.0166707	0.0565497	0.138949	0	0.07945	0.0488708	0.0250835	0.0121817	0.0288042	0.0845524	0.124537	0.0754451	0.106822	0.111855	0.0444655	0.180683	0.068372	0.0846598	0.0465233	0.0831381	0.0433308	0.230047	0.191737	0.0948047	0.0979122	0.0818787	0.0386958	0.0651628	0.0651455	0.436377	0.241499	0.117865	0.014783	0.0506182	0.240778	0.188148	0.132591	0.0257394	0.0463681	0.194343
CSF3	0	0	0	0	0	0	0	0	0	0.0180937	0	0	0	0.073913	0	0	0	0.020842	0	0	0.0409425	0.0210801	0.0971225	0	0.0163422	0	0.0167066	0.0252473	0.0257814	0	0	0	0.0187086	0	0.066651	0	0	0	0.0236813	0	0	0	0	0.0497773	0.0240245	0	0	0	0.0222034
ENSG00000260256	0	0	0.0842118	0.385349	0	0.0835504	0	0.119383	0	0	0.103029	0	0	0	0	0	0	0	0	0	0.171819	0	0	0	0	0	0	0.105953	0	0	0	0	0.0785124	1.05412	2.05119	0.176252	0	0	0	0	0.0976097	0.134668	0	0.104448	0	0	5.86193	0	0.0931787
TRIM40	0.106329	0.0206334	0.0356812	0	0.0596758	0.0177005	0.177683	0.0505835	0	0.0160865	0.0218272	0	0.0619553	0	0	0.0242046	0.117548	0	1.69298	0.0400576	0	0.0562249	0	0.0286049	0.130763	0.0263905	0.0148533	0	0.0916854	0	0	0	0.266131	0.171784	0.0197524	0.0373398	0.356316	0	0.336869	0	0	0	0.0244222	0.0221277	0	0.0284321	0.115908	0	0
GZMM	2.31789	1.30849	1.69707	1.40214	0.551891	1.21603	0.134142	5.21266	1.01683	0.637587	2.24931	1.36263	0.491118	3.5885	0.747646	2.4943	3.10602	2.00745	2.26365	2.11691	3.2702	1.73325	0.798562	0.415709	1.22852	0.62759	0.86344	0.177933	2.66489	0.883857	2.0012	0.601695	1.93382	0.771646	1.30481	0.295992	6.97821	1.06306	0.890117	8.06643	0.819612	1.47002	3.2911	0.935497	0.677263	2.32894	2.88767	1.12315	4.01635
ENSG00000236212	0	0	0	0	0	0	0	0	0	0	0	0	0	0	0	0	0	0	0	0	0	0	0	0	0	0	0	0	0	0	0	0	0	0	0	0	0	0	0	0	0	0	0	0	0	0	0.162142	0	0
SLC9A3	0.0238505	0.703493	0.40018	0.0732481	0.776375	0.444681	0.455493	4.99237	0.439442	3.83927	0.0587523	0.481203	0.111177	0	1.86173	0.0217171	0.147656	0.0831282	24.9811	0.035941	0.228619	2.06832	0.058106	0.436309	1.06896	0.236784	0.293191	0.100699	1.19282	0.0562733	0.585803	1.40465	0.761116	0.66276	1.15196	0.184264	0.0564174	0.270732	0.793406	0.0209088	0.0927696	0.0511961	0.525898	0.476489	0.824068	0.0765308	1.58966	0	0.194828
BEST3	0	0	0	0	0	0	0	0.00920202	0	0	0	0.0150101	0	0.00796964	0	0.00880647	0	0	0	0	0	0.00681886	0	0.0208149	0	0.00480089	0	0	0	0	0	0.144988	0	0	0.0215598	0	0	0	0.566861	0	0.692186	0.0051901	0	0	0.0621705	0	0.0060245	0	0.00718221
ENSG00000259424	0	0	0	0	0	0	0	0	0	0	0.163181	0	0	0	0	0	0	0	0	0	0	0	0	0	0	0	0	0	0	0	0	0	0	0	0	0	0	0	0.157403	0	0	0	0	0	0	0.21256	0	0	0
ENSG00000267607	0	0	0.0415173	0.221644	0	0.233417	0.0393799	0.0392379	0.0542745	0	0.0338631	0.016001	0.120148	0.0509745	0.0182905	0.450615	0.0729465	0.172485	0.189869	0.233047	0.367071	0.029076	0.184198	0.0332835	0.0225409	0.122828	0.0115218	0.0696477	0.266704	0.275691	0.0405167	0	0.322562	0	0.107254	0.0289648	0.0975519	0.0390104	0.0489959	0.144614	0.0641635	0.0221309	0.0757778	0.0171646	0	0	0.141288	0.0867691	0.245003
BANCR	0	0	0.0742467	0	0	0.0736636	0	0.421023	0	0	0	0	0	0.0911594	0	0	0	0.0771153	0	0	0	0.0779964	0.269515	0	0	0	0.0618145	0	0	0	0.108686	0.118459	0	0.0714907	0	0.155396	0	0.104645	0.175242	0	0	0	0.101637	0.092088	0	0.118325	0.0689102	0	0
AC004920.2	0	0	0	0	0	0	0	0	0	0	0	0	0	0.352875	0	0	0	0.298511	0	0	0	0	0	0	0.234062	0	0	0	0	0	0	0	0	0	0.318205	0	0	0	0	0	0	0	0	0.35647	0	0	0	0.3604	0
ENSG00000214970	0	0	0	0	0	0	0	0	0	0	0.036976	0	0	0	0	0.0410032	0	0	0	0.0339294	0	0	0	0	0	0	0	0	0	0.0708315	0	0	0	0	0.0334611	0	0	0	0.0356666	0	0	0	0	0	0	0	0.280503	0	0
RAB42P1	0	0	0	0	0	0	0	0	0	0	0	0	0	0	0	0	0	0	0	0	0	0	0	0	0	0	0	0	0	0	0	0	0	0	0	0	0.165622	0	0	0	0	0	0	0.174851	0	0	0	0	0
ITPR3	0.309351	0.438482	0.568698	0.764177	0.0905839	2.31962	1.08526	0.428701	0.911605	0.179067	0.154617	0.313114	0.274295	0.216123	0.596526	0.0489879	0.166535	2.09547	0.577954	0.714456	0.607791	0.649575	0.092842	0.112169	0.477847	0.801179	0.593719	0.193076	0.550891	0.11107	0.376602	0.136822	0.555457	1.1821	7.77554	0.28812	0.652219	0.0508914	70.5815	0.524704	0.324357	0.212924	0.401605	0.369472	0.378259	0.222983	0.938352	0.441462	1.6031
ENSG00000267734	0	0	0	0	0	0	0	0	0	0	0	0	0	0	0	0.243051	0	0.124046	0	0	0	0	0.072256	0	0.0972643	0.0441669	0	0	0.076722	0	0	0	0	0	0	0	0	0	0.0704726	0.0780015	0.0692166	0	0	0	0	0	0	0	0
PCDH7	0.0162567	0.0841238	0.0436425	0.23299	0.0243302	0.115466	0.0206978	0.108272	0.0213948	0.00983787	0.0177982	0.0336401	0	0.120564	0.0336468	0.00493418	0.0623029	0.0377738	0.0457388	0.0163318	0	0.106975	0.0132018	0.0058312	0.0651605	0.0780069	0.145339	0.114395	0.186904	0	0	0.0290127	0.18649	0.00350187	0.370446	0.483353	0.106818	0	0.643798	0.0997609	0.00843098	0.162846	0.00995709	0	0.0130626	0.017388	0.0337547	0.00912106	0.201206
ENSG00000278090	0	0	0	0	0	0.0351337	0	0	0	0	0	0	0	0	0	0	0	0	0	0	0	0	0	0	0	0	0	0	0	0	0.0259188	0	0	0	0.0392064	0.0185289	0	0	0.0208953	0	0	0	0	0	0	0	0	0	0.0195912
PIK3CD-AS1	0.0364103	0	0	0	0	0.0242447	0	0.0346426	0	0	0	0.0565082	0.0848614	0	0.0322968	0	0	0.0507616	0	0.0274339	0.0498587	0	0	0	0.0398021	0	0	0	0.0313958	0.0572713	0	0	0	0.0235296	0.0541105	0	0	0	0.0288385	0.0957583	0	0.019539	0.0334516	0	0.0292564	0.0389441	0	0.153214	0.0270387
ENSG00000224397	0.108325	0.0420413	0.109053	0.124755	0.395173	0.108196	0.258596	0.231898	0.285124	0.196661	0.578159	0.105074	0.662739	0.312419	0.648585	0.123294	0.79038	0.585208	0.166241	1.38752	1.66877	0.2864	0.241915	0.772256	0.14802	0.0941001	0.484226	0.137207	0.0233515	0.404673	0.399092	0.289985	0.372798	0.262512	0.281723	0.209223	0.448416	0.614808	0.471888	0.451079	0.14747	0.494112	0.597133	0.360687	0.108801	0.463452	0.843454	0.136749	0.663656
GAPDHP47	0	0	0	0.102027	0	0	0	0	0	0	0	0	0	0	0	0	0	0	0	0	0	0	0	0	0.0363159	0	0	0	0.0572919	0	0	0	0	0	0	0	0	0	0	0	0	0	0	0	0	0	0	0	0
ARL9	0.0527631	0.204776	0	0	0.0592252	0	0	0	0	0.22351	0.0433248	0.0409438	0.122975	0.0869565	0.0468022	0.0960871	0	0	0.0809733	0	0.0722515	0.0744004	0.0428481	0	0.201874	0.0261912	0.117929	0	0.13649	0.165987	0	0.0564986	0.132061	0.0340973	0.627303	0.0741157	0.041603	0.0499104	0.0417906	0.138766	0.0820915	0.113258	0.0484755	0	0.0847925	0.11287	0.0985997	0	0
FCF1P6	0	0	0	0	0	0	0	0	0	0	0	0	0	0	0	0	0	0	0	0	0	0	0	0	0	0	0	0	0	0	0	0	0	0	0	0	0	0	0	0	0	0	0	0	0	0	0	0	0
MTHFD2	0.449776	0.52897	0.841564	1.1511	0.367172	1.03462	0.871989	4.40907	0.340809	0.395906	1.14153	0.698045	0.460613	0.471708	1.17271	0.235798	0.964332	3.97136	0.951711	0.965323	1.11982	0.797581	0.553419	0.219999	1.57187	1.22457	1.37845	1.07034	1.83339	0.610998	1.00429	0.788103	0.579928	1.27714	2.89651	0.813675	2.6437	0.232068	7.09244	1.70863	0.487728	0.292564	0.989239	0.964371	1.12802	0.67059	0.815037	0.286766	2.90486
ENSG00000244619	0	0	0	0.249815	0	0	0	0	0	0	0	0	0	0	0	0	0	0	0	0	0	0	0	0	0.0889205	0.0807561	0	0	0.140281	0	0.159832	0	0	0	0	0	0	0	0	0	0	0	0	0	0	0	0	0	0
GPR82	0.0594589	0.0461526	0.0399057	0.121737	0.022247	0.0395922	0.0189256	0.0188574	0	0	0.11392	0.0461397	0	0.0653278	0.0527415	0.0721873	0.122701	0.179606	0.0912492	0.238934	0	0.083842	0.0482857	0.0106638	0.0866637	0.0688681	0	0.0502081	0.0854503	0.0311752	0.0778879	0	0.0620082	0	0.0294546	0.139202	0.0781376	0.0562442	0.172678	0.173751	0.0308364	0.0638155	0.127464	0.115488	0.063702	0.0847955	0.0740749	0.0667207	0.294366
TESPA1	0.501948	0.0615184	0.0797875	0.243402	0.0593077	0.105548	0.0126133	0.0754071	0.104304	0.0239809	0.303696	0.051251	0.123146	0.163271	0.105452	0.156359	0.105141	0.128909	0.233123	0.318484	0.452201	0.195573	0.117997	0.0142142	0.0938576	0.327846	0.184521	0.145002	0.717569	0.207772	0.155729	0.268742	0.413264	0.0256086	0.392611	0.17627	0.427025	0.0374849	0.219706	0.613736	0.0102757	0.0992389	0.473295	0.197921	0.106138	0.310824	0.55951	0.0222336	0.470844
CELF2	0.735487	0.455666	0.366818	1.00505	0.439291	0.269583	0.315717	0.410879	0.39961	0.155168	0.964059	0.408414	0.314531	0.328052	0.592542	0.178177	0.387897	0.639688	0.693801	1.14391	0.942465	0.375829	0.164388	0.137959	0.851945	0.666539	0.81062	0.347564	0.85529	0.339634	0.517079	0.361265	0.789538	0.287794	1.16824	0.606608	0.771455	0.102124	1.84381	1.22447	0.152224	0.307784	0.712916	1.26379	0.558448	0.678411	1.05919	0.27258	1.69867
PIGR	41.6215	136.375	27.8425	1.56055	65.771	176.409	16.4683	0.187613	36.5708	7.26072	611.062	2.63657	130.238	3.09975	0.61891	2.63798	45.4498	216.332	25.1286	181.796	13.7294	12.2235	15.89	8.83036	0.223846	81.6484	47.3949	7.33913	109.695	2.77954	1.68394	30.665	54.2037	28.2598	6.4019	220.502	0.693675	13.8746	0.168194	66.9122	6.13585	0.073258	8.43104	5.16417	16.1734	37.6877	21.6179	112.145	145.385
ENSG00000235123	0	0	0	0	0	0	0.0358292	0	0	0	0	0	0	0	0	0	0	0	0	0	0	0	0	0	0.123051	0	0	0	0	0	0.0368635	0	0	0	0	0	0	0	0.23775	0	0	0	0	0	0	0	0	0	0
CDH3	0	0.0413098	0.0428621	0	0	0.0354379	0.0101639	0.0303817	0.0140081	0.00644131	0	0	0	0.0526257	0.0472075	0.0290757	0	0.0667772	0.00816745	0	0.0291509	0.0300178	0	0.00572694	0.0116355	0.121523	0.124898	0	0.33959	0	0.261432	0.0569879	0.0666021	0.0412711	0.0553643	0.0373788	0.142675	0.0100685	0.185471	0.0186623	0.00828024	0.0114239	0	0.0177206	0.00855267	0.0113847	0.0464116	0.0447899	0
SEMA4D	0.285942	0.203758	0.607187	0.323913	0.352532	0.767849	0.35809	2.41285	0.172735	0.150346	0.696679	0.240076	1.53501	0.324466	0.390851	0.140853	0.286056	0.758082	0.517955	0.540383	1.30305	0.297444	0.190335	0.0680972	0.415063	0.632909	0.426939	0.229579	0.812441	0.412904	0.414481	0.235914	0.633555	0.627059	1.43507	0.408244	0.450922	0.616344	2.48012	1.01913	0.156803	0.208788	1.41258	0.491656	0.214694	0.381047	0.802979	0.299824	0.950324
BIRC3	5.86242	2.49453	10.1978	7.40235	2.11088	4.68554	1.82946	4.15815	2.01016	2.61803	61.2665	1.04138	2.56191	1.12767	2.41993	4.4698	25.3852	17.3925	7.18119	8.75442	6.52859	0.790546	1.24755	1.55812	2.53349	2.3184	7.76997	1.17794	23.4938	0.937401	11.0768	5.11462	21.5786	1.44351	16.8801	12.1539	2.39476	2.43031	11.2795	3.80807	1.147	1.14184	2.66057	3.68205	3.73866	6.45924	19.8756	4.72575	14.7914
ARSI	2.94418	0.0788034	0.163529	0.187075	0.546995	0.878825	0.0387775	0.309102	0.320666	0.135163	0.0333451	0.236344	0.11831	0.167316	0.432258	0.0184885	0.628519	0.254771	0.280447	0	0.0556087	0.730098	0.840946	0.0109248	1.1209	0.816405	0.703426	0.360057	0.315149	0.0638762	0.079794	0.152195	0.0508205	0.656079	0.980701	1.312	1.04065	0.134448	5.27495	0.694211	0	0.250613	0.31713	0.287335	0.37525	0.304047	6.05836	0	0.19602
HPCAL4	0	0.041533	0.00897784	0	0.0150152	0.00890732	0	0.0127274	0	0.00809512	0	0.0207607	0	0	0.0118656	0	0	0.0372988	0.0102645	0	0.0183177	0	0	0.00719733	0.014623	0	0.00747454	0.0112956	0.0346038	0	0	0	0.0334809	0	0.00993988	0	0.021095	0	0.10595	0	0	0	0.0122898	0.0111352	0	0	0.0166651	0.0112579	0
ENSG00000253690	0	0	0	0.114909	0	0	0	0	0	0	0	0	0	0	0.265511	0	0	0	0.0574208	0	0	0	0	0	0	0.037146	0	0	0.0645261	0	0.0735193	0	0.0936484	0	0	0	0.118008	0.0707861	0	0	0	0	0	0	0	0	0.326294	0	0.055571
RP11-112N13.1	0	0	0	0	0	0	0	0	0	0	0	0	0	0	0	0	0	0	0	0	0	0	0	0	0	0	0	0	0	0	0	0	0	0	0	0	0	0	0	0	0	0	0	0	0	0	0	0	0
PI16	0.0569262	0.243027	0.0191029	0.131121	0	0	0.0271792	0.0541625	0	0	0	0.176697	0	0	0.10099	0	0.201385	0.158728	0.0218406	0	0.0389762	0.060203	0.0924579	0	0	0.0141289	0.747499	0.0480694	0.539949	0	0	0	0.12467	0	0.23265	0	0.0897711	0	0.022544	0.124762	0	0.0610972	0.104601	0	0	0.0608877	0.0531897	0	0.295918
RANP5	0	0	0	0	0	0	0	0	0	0	0	0	0	0	0	0	0	0	0	0	0	0.0714471	0	0	0	0	0	0	0	0	0	0	0	0	0	0	0	0	0.0802635	0	0	0	0	0	0	0	0	0	0
ENSG00000267073	0	0	0	0	0	0	0	0	0	0	0	0	0	0	0	0	0	0	0	0	0	0	0	0	0	0	0	0	0.249933	0	0	0	0	0	0	0	0	0	0.229575	0	0	0	0	0	0	0	0.0902754	0	0
ENSG00000264513	0	0	0	0	0	0	0	0	0	0	0	0	0.323645	0	0	0	0	0	0	0	0	0	0.338303	0	0.151797	0.0689299	0	0	0	0	0	0	0	0	0	0.0975288	0	0	0.659907	0	0	0	0	0	0	0	0	0	0
TMPRSS11E	0	0.0240981	0	0	0	0.103363	0	0	0	0	0	0	0.0361792	0.127913	0.0550768	0.0282688	0	0	0	0	0	0.0437772	0.0252119	0	0	0	0.0173474	0.0262156	0	0.0244167	0.0305012	0	0	0	0	0	0	0	0.0245896	0	0	0	0	0	0.024946	0	0.0386774	0	0.0461099
CREB3L1	0.213745	0.765741	0.430362	4.26685	0.664402	1.06198	0.314005	1.01684	0.454409	0.0994997	0.17551	0.382764	0.0383211	0.243875	0.947985	0.194626	0.494408	0.240687	9.36134	0.123884	0.69796	0.324582	1.24176	0.15039	1.21321	0.285657	3.3717	0.305444	1.60206	0.0775866	0.839981	0.193666	0.504117	0.255008	3.0177	0.993117	1.08899	0.248847	3.00824	0.720698	0.268602	0.10588	0.211482	0.520091	0.449188	0.298963	0.522331	0.0138375	6.04392
OSMR	0.370092	2.70751	0.689271	4.37592	0.79968	3.53634	0.662621	2.01591	3.92086	2.43561	1.86892	3.68319	14.9764	0.800536	3.00377	4.76838	4.4842	2.93455	10.3867	2.69788	0.329412	3.2812	0.323087	0.233973	7.91941	0.950702	2.56426	1.25005	4.47569	0.356557	1.4544	5.11219	8.71303	3.21678	19.3739	2.85925	1.88949	0.175041	48.7546	3.65811	11.9552	0.481615	3.31518	1.52496	8.11838	2.15736	4.58185	0.241388	3.86142
MC4R	0	0	0	0	0	0	0	0	0	0	0	0	0	0	0	0	0	0	0	0	0	0	0	0	0	0	0	0	0	0.0313342	0	0	0	0	0	0	0	0	0	0	0	0	0	0.033165	0	0	0	0	0
SPRR1B	0	0	0	0	0	0	0	0	0	0	0	0	0	0.0882188	0	0.48741	0	0	0	0	0	0	0	0	0	0	0	0	0.184628	0	0.31554	0	0	0	0	0	0	0	0.423972	0	0	0	0	0	0	0	0	0	0
ASPHD2	0.593172	0.752029	0.451187	0.576875	0.488268	0.539804	0.113283	0.244562	0.234195	0.179482	0.714362	0.199462	0.760378	0.16293	0.456004	0.234049	0.926809	1.26803	0.333783	0.0893868	0.351981	0.264867	0.0160569	1.07448	0.864572	2.06112	0.651842	0.21705	0.153444	0.139954	0.135979	0.169378	0.148465	0.0511104	1.11661	0.208306	0.265035	0.11222	0.736047	0.485343	0.153815	0.137937	0.217988	0.559606	0.19065	0.296077	0.332543	0.948505	0.264298
C10orf91	2.04985	0.0252557	0	0.0499631	0.0365222	0	0	0.402448	0	0	0	0	0.0379172	0	0	0	0	0.022681	0.0499336	0.17161	0	0	0.026423	0.0175065	0.0177841	0.0484537	0.0181807	0	0	0	0	0.0348408	0.0407187	0	0.120887	0	0.0769656	0	0.154625	0	0	0.0174606	0	0	0	0	0	0	0
NPL	5.0299	4.42206	9.00811	2.7658	1.54252	0.923941	0.738925	0.964756	6.58453	2.9147	4.30543	2.45371	3.405	4.35366	3.23085	1.11766	1.49857	1.86937	11.1181	5.3078	7.10697	2.65266	3.41295	15.1252	2.0127	18.7757	8.26015	1.397	6.14337	4.01883	9.39834	4.37166	7.67214	26.8575	3.16254	6.49383	0.736394	3.04155	1.73305	7.67278	7.73236	3.29348	2.91734	2.08795	7.01121	6.05063	6.98936	2.23448	2.93272
EIF3KP1	0.202366	0	0	0	0	0	0.0966187	0.0962705	0	0	0	0	0	0	0	0	0	0.0705323	0.0776406	0	0	0	0	0	0.110608	0	0.0565376	0	0.0872479	0.159155	0	0	0.189938	0	0.0751855	0	0.0797814	0.0957123	0.0801411	0	0	0	0.185921	0	0	0.108224	0	0.0851554	0.150279
MICG	0	0	0	0	0	0	0	0	0	0	0	0	0	0	0	0	0	0	0	0	0	0	0	0	0	0	0	0	0	0	0	0	0	0	0	0	0	0	0	0	0	0	0	0	0	0	0	0	0
ENSG00000249911	0	0.0644021	0	0	0	0	0	0	0	0	0	0	0	0	0	0	0	0	0	0	0	0	0	0	0	0	0	0	0.21463	0	0	0.266532	0.0519163	0	0.123304	0.0582735	0	0	0.0657157	0	0.0645444	0	0.0762278	0.069066	0.33334	0	0	0	0
ENSG00000235576	2.18522	0.63607	2.38323	0.419443	1.53303	0.363771	0	0.519781	1.07845	0.330601	6.05584	0.635892	0.636635	1.35051	1.21146	2.23847	1.2079	1.52326	8.38391	3.08716	3.74043	1.54067	3.32734	0	0.597195	1.4915	1.0684	0.922616	6.12387	3.65205	1.61016	0.292491	1.36734	0.17652	2.23267	1.15108	3.44603	0.775151	1.51444	4.07085	0	0.439749	3.76433	1.59164	0.219483	4.09025	1.19104	0.689653	1.82561
ENSG00000237262	0	0	0	0	0	0	0	0	0	0	0	0	0	0	0	0	0	0	0	0	0	0	0	0	0	0	0.0790804	0	0	0	0	0	0	0	0	0	0	0	0.112095	0	0	0	0	0	0	0	0	0	0
RPTN	0	0	0	0	0	0	0	0	0	0	0	0	0	0	0	0	0	0	0	0	0	0	0	0	0	0	0.0103919	0	0	0	0	0	0	0	0.0138195	0	0	0	0	0	0	0	0	0	0	0	0.0115848	0	0
ENSG00000249710	0	0	0	0	0	0	0	0	0	0	0	0	0	0	0	0	0.111604	0	0	0	0	0	0	0	0.206918	0	0	0	0	0	0	0	0	0	0	0	0	0	0	0.110626	0	0	0	0	0	0	0	0	0
NR0B1	0.0301298	0	0	0	0	0	0	0.28667	0.118958	0.0364666	0.123701	0	0	0	0.0267259	0	0	0	0	0	0	0	0	0	0	0	0	0	0	0	0.0296013	0	0	0	1.00748	0	0	0	0	0	0	0	0.0276814	0	0.0242099	0	0	0	0
OR1X1P	0	0	0	0	0	0	0	0	0	0	0	0	0	0	0	0	0	0	0	0	0	0	0	0	0	0	0	0	0	0	0	0	0	0	0	0	0	0	0	0	0	0	0	0	0	0	0	0	0
CIITA	0.85831	0.393184	0.639009	0.749023	0.410642	0.693329	0.282155	0.450713	2.01844	0.811762	0.781799	0.476784	0.273287	0.529487	0.811267	0.166557	0.941616	1.1018	0.860147	0.788063	1.37443	1.4087	0.407548	0.214501	1.27409	0.733379	0.741669	0.427734	0.618775	0.951691	0.907765	0.557473	1.52022	0.330377	0.98978	0.494122	0.639784	0.310564	1.98744	2.12576	0.229864	0.234075	0.70669	0.351382	1.06654	1.77086	1.79969	0.292099	1.41758
ENSG00000277639	0.0576681	0.3581	1.0063	0.442766	0.647309	0.383998	0	0	0.151789	0.244288	0.947048	0.40275	0.0672034	0.237601	0.102306	0.0525098	1.78508	0.200995	0.0885008	0.869017	0.236905	0.0406584	0.0468314	0.0620559	0.283681	0.14313	0.580014	0.0973917	0.149178	1.26992	0.0566565	0.432256	0.0721687	1.00621	0.471363	0.445531	0.181882	0.436401	1.18756	0.101111	0.448615	0.309467	0	0.0960084	0.509713	1.72707	0.718438	0.1456	0.214125
NEFL	0	0.202326	0	0	0	0.0204196	0	0.0291769	0	0	0.0503604	0	0	0.0126347	0.816038	0.0139614	0	0.94056	0	0	0	0	0	0.0164995	0	0	0.017135	0	0	0	0.0602556	0	0	0.00990863	0.06836	0	0.0120898	1.42138	0.0242885	0.0268834	0	0.00822815	0.0140869	0.0510537	0	0.0163999	0	0	0.0113864
COL3A1	10.2912	64.2375	34.6783	73.9407	12.4923	26.8524	24.8744	107.215	1.7571	11.4235	10.4988	15.6163	1.44231	13.0415	14.1855	5.92763	52.0326	25.2575	29.0742	15.0454	7.87352	44.6129	6.02263	2.97304	252.503	29.0398	60.6619	17.5775	90.5368	5.31915	16.4968	19.3263	14.7082	13.7166	398.723	35.5168	47.1805	6.13952	347.036	21.7344	19.3776	25.2753	9.03407	13.4826	23.5624	21.9208	36.1437	5.63458	36.7714
ENSG00000225107	0	0	0	0	0	0	0	0	0	0	0	0	0	0	0	0	0	0	0	0	0	0	0	0	0	0	0	0	0	0	0	0	0	0	0	0	0	0	0	0	0	0	0	0	0	0	0	0.737673	0
ENSG00000248479	0	0	0	0	0	0	0	0	0	0	0	0	0	0	0.152928	0	0	0	0	0	0	0	0	0	0	0	0	0	0	0	0	0	0	0	0	0	0	0	0	0	0	0	0.158395	0	0	0	0	0	0
ENSG00000259004	0.0703881	0.0546359	0.141722	0.324257	0	0.0937394	0.134426	0.200912	0	0.085192	0.115594	0.0546206	0.0820267	0.116004	0	0.128184	0.0622521	0.0981318	0	0.424279	0.0963865	0.0992531	0	0.0378719	0.076945	0.13976	0.0393305	0.0594369	0.849719	0.110716	0.20746	0.0753714	0	0	0.261515	0.0988733	0.0555001	0	0.0557503	0.493651	0	0.0755454	0.258673	0.0585926	0	0.376432	0.131536	0.41467	0.313626
CXCL17	0.33495	0.129996	0.0749336	0.0857231	0	0.371725	0.106614	0.0531148	0.146938	0.371613	72.3798	0.0866396	6.05017	0.138004	1.33699	0.152495	0	4.70864	0.0856724	0	0.152889	0.275513	0.0453347	0.81098	1.49512	5.4868	0.374318	0.235698	4.81368	0.131714	0.0548458	0.0597773	1.25752	1.26266	0.207408	0.627334	4.8419	0.211227	0.0442158	0	0	0.0299577	2.15412	4.04289	0.0448566	0.17913	5.28563	0.469823	0.0414563
ENSG00000259754	0	0	0.0766748	0.17543	0	0	0	0	0	0	0	0	0	0	0	0	0	0	0	0	0	0	0	0	0.124887	0	0	0	0	0	0	0	0	0	0.0848911	0	0	0	0	0	0	0	0	0	0.0917977	0	0	0	0
NME8	0	0.0422482	0.0182649	0	0	0.0724857	0	0.0517863	0	1.84453	0.0223463	0	0.158571	0.0672763	0.0482797	0.0991206	0.0240688	0.0379411	0.0417649	0.0205051	0.29813	0	0.176803	0	0.0892487	0	0.0456195	0.0229803	0.211198	0	0	0.0291411	0.13623	0	0.101111	0.0191139	0.0429164	0.025743	0.237105	0.167004	0	0.0146042	0.025003	0.0226539	0.0218674	0.203758	0.0169521	0.0458072	0.101049
ENSG00000230526	0.12643	0.0981365	0	0	0.141915	0	0	0	0	0	0.103814	0	0.147335	0	0.112147	0	0.111817	0	0	0	0	0.0891387	0	0	0.069104	0.251036	0.211935	0	0	0.0994339	0	0	0	0.0817037	0.375784	0	0	0	0.100138	0	0	0	0	0	0	0	0	0	0
ENSG00000232679	0.35432	0.733404	0	0.362721	0.265143	0	0.338337	0	0.932613	0	0.484898	0.1833	0	0.583939	0.209527	0.107542	6.37176	0.246988	14.8628	0.0889892	0	0.16654	0	0.444826	0	0.820781	0.0659941	0	0.916569	3.25107	0	0	0	0.99222	0	0	0.0931256	0.111721	0.0935455	0	0	0.0633802	0	0.786517	0	0.126326	6.25342	0.596391	0
ENSG00000226472	0	0	0	0	0.0754484	0.0447576	0	0.287788	0	0.0610147	0	0	0.0783303	0	0	0	0.0297234	0.0937097	0	0	0	0	0.0272926	0	0.0183694	0.0834139	0.0563372	0	0.0579591	0	0.23113	0.0719749	0	0.0651561	0.049946	0.0708133	0.0264995	0.031791	0.053238	0.0589257	0	0.0901764	0.0926312	0.0279761	0	0.251628	0.167478	0.0282845	0.0748732
ADAMTS12	0.142554	0.337225	0.451039	0.844334	0.160013	0.348052	0.388925	0.871928	0.125073	0.242372	0.161646	0.400343	0.0791073	0.167812	0.204727	0.117441	0.354216	0.274454	0.265652	0.38872	0.120843	0.478603	0.413451	0.109572	1.17988	0.694149	0.697926	0.183429	0.965812	0.261601	0.706937	0.610587	0.297332	0.513259	1.61413	0.896332	0.476371	0.0256851	3.60233	0.446327	0.285163	0.309641	0.124734	0.226029	1.03636	0.341252	0.828783	0.125686	0.352874
TMC8	2.15214	0.906041	1.10982	1.19494	0.641463	1.01205	0.255432	1.13373	1.48818	0.375264	2.31629	0.707647	1.20441	1.70329	1.31581	0.774998	1.05385	2.2715	1.44614	2.08879	3.04695	1.063	0.918296	0.235515	1.26271	1.24334	1.88195	0.585234	3.17679	0.870206	1.62462	0.533813	2.7846	0.32216	2.13224	1.13579	2.0229	0.437061	2.00313	3.53889	0.482399	1.54641	2.11131	1.42712	0.713211	1.61264	2.65088	0.910737	3.65691
ENSG00000231527	0	0	0.0229629	0	0.0384048	0.0227825	0	0	0	0	0	0.0265501	0	0	0	0	0	0.0238501	0	0	0	0	0	0.0184089	0	0.0169838	0.0191179	0	0	0	0	0	0	0	0	0	0.0269776	0	0.0270993	0.0299944	0	0	0	0	0	0	0.0426249	0	0
RP11-540B6.2	0	0	0	0	0.0772075	0	0.131361	0	0	0	0	0	0	0	0	0.125262	0	0.0479473	0	0	0	0	0	0.0370085	0.0375954	0	0.0384339	0	0.0593105	0.0540962	0	0	0	0.0444502	0	0	0	0.0650645	0.108959	0	0	0	0	0	0	0	0	0	0
PCDHB3	2.98706	0.0213694	0.073908	0.612986	0	0.0824934	0.0657216	0.17026	0.0362318	0.0166603	0.7799	0.234998	0.12833	0.0226859	0.170942	0.0376019	0.109567	0.0191909	0.169	0.0207432	0.0376991	0.0776405	0	0.0148126	8.96833	0.157158	0.0999902	0.0348708	0.0593474	0.216519	0.0405713	0.147398	0.068906	0.0800601	1.29902	1.28584	0.662076	0.325525	0.218053	0.0724046	0	0.0443214	0.0126467	1.0771	0.154849	0.0147232	0.188638	0.0115848	0.112444
THEMIS2	1.68059	0.802761	0.896552	2.13951	1.93478	0.956463	1.68707	1.09333	1.13423	0.921404	1.61585	0.512732	3.18042	1.51505	1.50346	0.640879	1.61337	2.44312	1.88475	3.78796	2.71438	1.54946	1.0265	0.641461	6.06884	2.83781	2.151	1.21292	2.16751	0.926343	5.68714	0.984379	2.7503	1.51305	5.00582	2.01769	1.51766	0.679368	7.55425	6.7243	0.391094	1.37977	2.19066	2.58269	2.60844	2.18163	1.53896	1.81331	2.81605
PIFO	0.0155776	0.0725487	0.198642	0	0.122398	0.0103727	0.0297498	0.11857	0.082004	0.235672	0.0255821	0.0483523	0.0544599	0.0128363	0	0	0.013777	0.0217175	0.0119531	0	0.0639937	0.065897	0	0.0502884	0.0170287	0.0773257	0.0609295	0	0.0134322	0	0	0.250206	0.0194945	0.0201335	0.40513	0.0109408	0.0368481	0.103147	0.431833	0.0136562	0	0.0250784	0.0286234	0.0389013	0.237821	0.0999695	0.417246	0	0.0115681
ENSG00000260253	0	0	0	0.135719	0	0	0	0	0	0	0	0	0	0	0.0783983	0	0	0	0	0	0.121029	0	0	0	0.0966167	0	0	0	0	0	0	0	0	0	0.131349	0	0	0	0	0	0.137511	0	0	0	0	0	0	0	0
VAV1	1.15638	0.466747	0.848534	0.994388	0.380747	0.574935	0.323903	0.850848	1.01457	0.559833	1.20273	0.406794	0.700742	0.787719	0.820587	0.35098	1.02271	1.55843	1.04112	2.26535	2.04798	0.804423	0.475799	0.398196	1.69389	1.04088	0.766758	0.533799	1.38267	0.921583	1.8026	0.478788	0.85864	0.408518	1.48939	1.03958	1.14277	0.306279	2.60115	2.5141	0.335841	0.877046	1.60069	0.834247	0.607059	1.36878	1.22934	1.45332	1.98082
ENSG00000260895	0.320141	0	0.0716206	0	0	0.213174	0.2038	0	0	0	0	0	0	0.263805	0.0946578	0	0	0.223163	0	0	0.146129	0.0752377	0	0	0	0.0529718	0	0	0	0.0839274	0	0	0	0	0.0792954	0	0.0841424	0.201888	0	0.0935517	0	0	0	0.0888309	0	0	0	0.0898102	0
ENSG00000241155	0	0.0825667	0.0713911	0	0.238799	0.0708304	0	0	0	0	0.0873439	0	0	0	0.0943544	0	0	0	0	0	0	0.0749965	0	0	0.0581404	1.10884	0.059437	0	0	0	0	0	0	0	0.237124	0.0747096	0	0	1.01101	0.0932518	0.165499	0	0.195456	0.0885462	0	0.113774	0.0662598	0	0.0789928
SAMD3	0.105771	0.0597093	0.0774412	0.0147653	0.0323795	0.0896384	0.00918179	0.0914869	0.0379638	0.0174568	0.118432	0.0596926	0.0336163	0.00792346	0.127938	0	0.093545	0.0871359	0.103296	0.202859	0.237008	0.0881315	0.0390431	0.0206943	0.0473006	0.128873	0.0698469	0.048717	0.13266	0.045374	0.160596	0.0411851	0.168467	0.0621388	0.0714497	0.128315	0.128889	0.0363826	0.0913908	0.311893	0.0523611	0.144481	0.176683	0.0720376	0.115894	0.143985	0.221615	0	0.207077
ENSG00000281460	0	0	0	0	0	0	0	0	0	0	0	0	0	0	0	0	0	0	0	0	0	0	0	0	0	0	0	0	0	0	0	0	0	0	0	0	0	0	0	0	0	0	0	0	0	0	0	0	0
PKIA	0.362108	0.097764	0.137363	0.0483514	0	0.0629006	0	0.104856	0.0621595	0	0.116348	0	0.146776	0.0129734	0.0279303	0.0143356	0.0696202	0.0987719	0.0604035	0.0474497	0.0431179	0.0222001	0	0.0592961	0.0946574	0.0234453	0.105566	0	0.0814535	0.0495283	0	0.101151	0.0394052	0.0712194	0.233974	0.0442303	0.062069	0.223389	0.0997582	0.0828119	0.024495	0.00844869	0.621972	0.026211	0.0126505	0	0.882626	0	0.187065
MRPS18CP4	0	0	0	0	0	0	0	0	0	0	0	0	0	0	0	0	0	0	0	0	0	0	0	0	0	0	0	0	0	0	0	0	0	0	0	0	0	0.271806	0	0	0	0	0	0	0	0.614676	0	0	0
RP11-579O24.1	0	0	0	0	0	0	0.165488	0	0	0	0.142304	0	0	0	0	0	0	0	0	0	0	0	0	0	0	0	0	0	0	0.1363	0	0	0	0	0	0	0	0	0	0	0	0	0	0	0	0	0	0	0
CA1	0.0163166	0	0	0	0.0366299	0.0217297	0	0	0.0429473	0	0	0	0	0.524368	0.0289465	0.0148571	0.0144306	0.204731	0.0500809	0.196704	0	1.29994	0	0.00877905	0.00891829	0.0404972	0.0455859	0.013778	0.0422084	0	0	0.0174718	0.888244	0	0.181865	0.527154	0	0	0.0129234	0.0143041	0	0.0963167	0.119926	0	0	0	0	0	0.133286
ENSG00000230836	0	0	0	0	0.0588509	0	0	0.149653	0	0	0	0	0.0610989	0	0	0	0	0	0.0402308	0	0	0	0	0	0	0.0520513	0	0.0442725	0	0	0	0	0	0	0.350628	0.147295	0	0	0	0.045963	0	0	0.0481692	0	0.0421283	0	0.0653177	0	0
ENSG00000234199	0	0	0.158346	0	0	0	0	0.82309	0	0	0	0	0	0.129611	0	0	0	0	0	0.0592558	0	0	0.127732	0	0	0	0	0	0	0	0	0	0.0984196	0	1.57783	0.165707	0.0620102	0	0.0622898	0	0	0.12661	0	0	0.0631925	0.0841173	0	0.330936	0
CHRM2	0	0.0309551	0	0.0122476	0.0179056	0.005311	0	0	0	0	0	0	0	0.0131448	0	0	0.0211621	0	0	0	0	0.00562339	0	0	0	0.00791841	0	0	0	0	0	0	0	0	0	0.0560187	0	0	0	0.00699221	0	0.0642027	0	0	0.00640885	0	0.0447146	0	0.0829225
ADRA2A	0.0531717	0.151332	0.249802	0.0816486	0	0.448472	0.0676976	0.809443	0.16328	0.740078	0	0.137536	0.0619635	0.438149	0.440203	0.0806926	0.109727	6.47398	0.122401	0.454047	0.194163	0.149953	0.0863599	0.0190725	1.04625	0.0791819	0.752668	0.0598654	1.63528	0.195151	0.0870649	0.170808	0.288347	0.194714	1.46187	0.273862	0.461177	0.0670625	8.82994	0.0776891	0.234394	0.0475563	0.0488509	0	0.413004	0.170616	0.187686	0.223746	0.763393
CYBB	2.25105	0.768806	1.70215	2.78835	0.960163	0.979294	0.988775	0.999489	2.07376	1.08979	3.19154	0.593911	1.57396	1.01403	2.79543	0.38261	1.06179	2.55249	3.42005	6.7165	3.61679	2.30656	0.92621	0.427944	6.66862	3.15853	1.14042	1.05179	2.47158	0.590129	6.04494	0.996307	1.39915	2.03659	4.43817	4.24765	2.10624	1.14985	14.3585	4.84142	0.852226	2.27103	2.4266	2.18613	2.76138	4.01283	1.74807	3.39744	4.71407
KRT78	0	0	0	0	0	0	0	0	0	0	0	0	0	0	0	0.0185395	0	0	0	0.0153411	0	0	0	0	0	0	0	0	0	0	0	0	0	0	0.0151294	0	0	0	0	0	0	0	0	0	0	0	0	0	0
LDLRAD1	2.01224	0.108467	1.57559	28.1527	0.627413	0.0186097	0.18681	0.132955	0	1.21772	4.56674	0.108436	0.0325689	0.115149	0	0.101792	1.63135	0.0974088	0.772026	13.2031	0.0382705	0	0	5.84944	0.0152756	2.95496	1.17122	0	0.771161	0.395642	0	0.0897793	1.11921	0.88498	1.39139	3.29767	0.528875	9.09424	0.154951	0.122503	0	0	0.128384	0.0930574	0.0898265	0.56796	0.435222	0.164646	0.166035
ENSG00000259307	0	0	0	0	0	0	0	0	0	0	0	0	0	0	0	0	0	0	0	0	0	0	0	0	0	0	0	0	0	0	0	0	0	0	0	0	0	0	0	0	0	0	0	0	0	0	0	0	0
ENSG00000259076	0	0	0	0	0	0	0	0	0	0	0	0	0	0	0	0	0	0	0	0	0	0	0	0	0	0	0	0	0	0	0	0	0	0	0	0	0	0	0	0	0	0	0	0	0	0	0	0	0
ENSG00000260577	0	0	0.0264852	0	0	0	0	0.0375466	0	0.0238811	0	0	0	0	0	0	0	0	0.0302808	0	0.0540383	0	0	0	0	0.0195889	0	0	0	0	0	0	0	0.025502	0.0293233	0	0.0311157	0.0373289	0.031256	0.0345952	0	0	0	0	0	0	0.0245815	0	0.0293053
AP000647.3	0	0	0	0	0	0	0	0	0	0	0	0	0	0	0	0	0	0	0	0	0	0	0	0	0	0	0	0	0	0	0	0	0	0	0	0	0	0	0	0	0	0	0	0	0	0	0.0366869	0	0
SLC9C1	0	0.0242455	0.0104819	0	0	0	0	0	0.0205541	0	0	0	0	0	0	0	0	0.0326606	0	0	0	0.0220225	0.0380492	0	0	0	0.0436337	0	0	0	0.0306878	0	0	0.0100928	0.0696307	0.0329074	0.024629	0	0.03711	0	0	0	0	0	0	0	0	0	0
MTND4P9	0	0	0	0	0	0	0	0.0469193	0	0	0	0	0	0	0	0	0	0	0	0	0	0	0	0.0265328	0.0539073	0	0	0	0	0	0	0	0.0308567	0	0.10993	0	0	0	0.117175	0	0	0	0	0	0	0	0	0	0
PRUNE2	0.837852	0.126554	0.0455936	0.0139089	0.0101672	0.0331727	0.0129739	0.857501	0.0298017	0.0301479	0.0446255	0.0246009	0.0369445	0.0373196	0.0843627	0.00412383	0.0841142	0.183107	0.0243263	0.122846	0.0372103	0.134109	0.00367788	0.0389882	0.143574	0.101166	0.0556735	0.0152972	0.0468624	0.0391806	0.0711917	0.0193983	0.0283386	0.0643885	0.962473	0.0986069	0.010713	0.0899653	0.197291	0.12308	0.0493244	0.133671	1.98891	0.0527797	0.0727818	0.0145323	0.129771	0.0152462	0.137892
RP11-315D13.1	0	0	0	0	0	0.051513	0	0	0	0	0	0	0	0	0	0	0	0	0	0	0	0	0	0	0	0	0	0	0	0	0	0.0828383	0	0	0	0	0	0	0	0	0	0	0	0	0	0	0	0	0
TFF1	0	0	0	0	0	14.7594	0.460123	0.802312	0	1.3122	0	0.186959	0	0	1.06855	0	0	0	0	0	0	1.10412	0	2.07409	4.08228	0	0	0	0	0	0	0	0	0	2.32734	0	0.0949847	0	2.9578	0	0.468562	0	0	0	0	0	2.47626	0	0
OR7E12P	0	0	0	0	0	0.0454246	0	0	0	0	0	0	0	0	0	0.0621159	0	0.0475531	0	0	0	0	0	0	0	0	0.0381179	0	0	0	0	0	0	0	0.101381	0	0	0.129059	0	0	0	0	0	0	0.0548145	0	0	0	0
KCNN4	0.383443	0.219308	0.189624	0.278906	0	0.51065	0.0385417	0.422431	0.292156	0.0977027	0.298281	0.438493	0.446845	0.482266	0.232716	0.018376	0.214182	0.478307	0.325198	0.927555	1.29886	0.170743	0.524444	0.108584	0.176489	0.290516	0.439787	0.374909	1.53136	0.603134	0.0594816	0.08644	0.959718	0.0912925	0.764794	0.113393	0.66833	0.248171	0.143859	1.1146	0.0313989	0.108299	0.760192	0.184792	0.0810801	0.561225	0.691407	0.118891	0.809286
ENSG00000225541	0	0	0	0	0	0	0	0	0	0	0.0425137	0	0	0	0	0	0	0	0	0	0	0	0.042046	0	0	0	0	0	0.0892896	0	0	0	0	0	0.0384725	0	0.0408242	0	0	0	0	0	0	0	0	0	0.935287	0	0
ENSG00000237087	0	0	0	0	0	0	0	0	0	0	0	0	0	0	0	0	0	0	0	0	0	0	0	0	0	0	0	0	0	0	0	0	0	0	0.085628	0	0	0	0	0	0	0	0	0	0	0	0	0	0
MLLT3	0.0816533	0.15845	0.460331	0.363614	0.192473	0.141364	0.101361	0.20976	0.0214921	0.182829	0.657062	1.82484	0.0666082	0.141298	0.159343	0.423793	0.281639	0.193523	0.269416	0.172264	0.190081	0.679314	0.437642	0.057113	0.459687	0.271565	0.282876	0.137899	0.450611	0.276137	0.240663	4.33674	0.54158	0.142471	0.649209	0.206455	0.225339	1.22809	11.2401	0.429493	0.825762	0.245381	0.142534	0.156331	2.00111	1.08296	5.63556	0.0412316	0.345629
P3H2	0.0947383	0.340107	0.68352	1.49114	0.0398779	0.473129	0.542789	0.281684	2.80533	0.494486	0.709846	0.56975	0.165605	0.770911	0.714299	0.452886	1.12066	0.544829	0.817824	0.562132	0.194596	0.626197	0.423145	0.331327	0.828508	0.881761	0.999178	0.499991	1.256	0.288722	1.2798	2.35861	0.87438	0.283157	1.17035	0.790149	0.448199	0.212838	1.96971	0.705952	1.22525	0.679983	0.1632	0.473173	0.666086	0.531988	0.206546	0.378725	1.78522
AC008746.9	0	0	0	0	0	0	0	0	0	0	0	0	0	0	0	0	0	0	0	0	0	0	0	0	0	0	0	0	0	0	0	0	0	0	0	0	0	0	0	0	0	0	0	0	0	0	0	0	0
RRAD	0.349552	2.1706	1.27727	0	0.871917	1.06034	0.222523	7.72327	0.102229	1.2457	0.063783	0.210972	0.271566	0.64009	0.447866	0.742665	0.858744	0.297812	0.566245	1.14129	0.691399	0.492897	0.378488	0.334354	0.976513	1.60019	1.28042	1.47584	1.77498	0.213821	0.305262	0.207944	1.16652	0.451785	1.2987	0.109114	0.489986	0.771523	0.430671	0.374535	0.211497	0.333478	0.35683	0.129322	0.436912	0.540044	0.145159	0.555677	1.93244
HAPLN3	0.527391	0.409366	0.518294	1.09907	0.19028	0.652186	0.251801	0.609312	0.148731	0.125383	0.402119	0.613878	0.175599	0.68292	0.484517	0.308711	0.38314	0.9716	0.939443	0.31222	1.83126	0.212476	0.504767	0.0405371	0.92655	0.308541	1.23138	1.04972	0.698379	1.06657	0.33309	0.141182	0.825004	0.316474	2.86917	0.224892	0.965346	0.17817	1.44709	1.56866	0.0293051	0.181939	0.242268	0.486049	0.0908078	0.664823	0.680498	0.190222	1.72045
[truncated: 1,983 more rows]
[truncated: 320 more columns]

## Sheet: Down-regulation Genes
ENSG_IDs	TCGA-DD-AAE1-01	TCGA-RC-A7SK-01	TCGA-DD-AAEE-01	TCGA-DD-AADY-01	TCGA-DD-AACV-01	TCGA-CC-A7IF-01	TCGA-G3-A5SI-01	TCGA-ED-A66Y-01	TCGA-DD-AAE9-01	TCGA-RC-A6M4-01	TCGA-DD-AADR-01	TCGA-DD-AADG-01	TCGA-DD-AAD6-01	TCGA-G3-AAV0-01	TCGA-2Y-A9GU-01	TCGA-DD-A39Z-01	TCGA-DD-A3A5-01	TCGA-CC-A9FS-01	TCGA-DD-AACY-01	TCGA-DD-AAEI-01	TCGA-DD-AAEA-01	TCGA-CC-A7IH-01	TCGA-DD-AAEB-01	TCGA-CC-A7IL-01	TCGA-DD-A118-01	TCGA-BC-A3KF-01	TCGA-NI-A8LF-01	TCGA-DD-AACE-01	TCGA-KR-A7K2-01	TCGA-DD-AADF-01	TCGA-G3-AAV4-01	TCGA-DD-A73E-01	TCGA-LG-A9QD-01	TCGA-DD-A73B-01	TCGA-DD-AADW-01	TCGA-DD-A11B-01	TCGA-ED-A8O5-01	TCGA-BC-A5W4-01	TCGA-BC-A10Q-01	TCGA-MI-A75H-01	TCGA-DD-A3A4-01	TCGA-DD-A3A2-01	TCGA-DD-AACW-01	TCGA-XR-A8TF-01	TCGA-DD-A4NF-01	TCGA-2Y-A9H4-01	TCGA-QA-A7B7-01	TCGA-DD-AAVU-01	TCGA-G3-A3CH-01
[truncated: 399 more rows]
[truncated: 320 more columns]
