# Supplementary material for: High S100A9+ cell density predicts a poor prognosis in hepatocellular carcinoma patients after curative resection
Source: Aging (Albany NY). 2021 Jun 22;13(12):16367–80. doi: 10.18632/aging.203162 (PMC8266308; doi:10.18632/aging.203162)
Supplement: Supplementary Table 4 [file aging-13-203162-s004.xlsx]

## Sheet: go
Supplementary Table 4. Top 30 of GO Enrichment.
GO_ID	Description	TYPE	GeneRatio	BgRatio	p value	q value	Count	genes	enrich_factor
GO:2000503	positive regulation of natural killer cell chemotaxis	biological_process	6/1539	6/18668	3.377e-05	7.929e-04	6	CCL7 CXCL14 CCL3 CCL5 XCL1 CCL4	12.13
GO:0071315	cellular response to morphine	biological_process	4/1539	4/18668	4.972e-04	8.122e-03	4	SPN OPRM1 CCL5 AIF1	12.13
GO:0001781	neutrophil apoptotic process	biological_process	4/1539	4/18668	4.972e-04	8.122e-03	4	IFNG HCAR2 IL6 ANXA1	12.13
GO:0002752	cell surface pattern recognition receptor signaling pathway	biological_process	4/1539	4/18668	4.972e-04	8.122e-03	4	FCN1 TLR2 CLEC7A FFAR2	12.13
GO:0071317	cellular response to isoquinoline alkaloid	biological_process	4/1539	5/18668	9.318e-04	1.358e-02	4	SPN OPRM1 CCL5 AIF1	9.70
GO:0032010	phagolysosome	cellular_component	4/1539	5/18668	9.318e-04	1.358e-02	4	NCF4 ADAM8 NCF2 NCF1	9.70
GO:0070891	lipoteichoic acid binding	molecular_function	4/1539	5/18668	9.318e-04	1.358e-02	4	TLR2 LBP TREM2 CD6	9.70
GO:0042613	MHC class II protein complex	cellular_component	12/1539	16/18668	1.222e-07	4.823e-06	12	HLA-DPA1 HLA-DRA HLA-DMA HLA-DQA2 HLA-DQA1 HLA-DQB2 HLA-DMB HLA-DOA HLA-DPB1 HLA-DRB5 HLA-DOB CD74	9.10
GO:0050786	RAGE receptor binding	molecular_function	8/1539	11/18668	1.330e-05	3.481e-04	8	S100A7 S100A4 FPR1 S100P S100A8 S100B S100A9 S100A12	8.82
GO:0035747	natural killer cell chemotaxis	biological_process	8/1539	11/18668	1.330e-05	3.481e-04	8	CCL7 CCL2 XCL1 CCL4 CXCL14 CCL3 CCL5 PIK3CG	8.82
GO:0002291	T cell activation via T cell receptor contact with antigen bound to MHC molecule on antigen presenting cell	biological_process	5/1539	7/18668	4.185e-04	7.090e-03	5	LILRB1 LGALS9 LGALS2 ICAM1 HLA-DMB	8.66
GO:0043305	negative regulation of mast cell degranulation	biological_process	5/1539	7/18668	4.185e-04	7.090e-03	5	CD300A LGALS9 CD84 HMOX1 IL13RA2	8.66
GO:0002523	leukocyte migration involved in inflammatory response	biological_process	7/1539	10/18668	4.930e-05	1.108e-03	7	CCL2 ITGAM FFAR2 S100A8 LBP ADAM8 S100A9	8.49
GO:0032695	negative regulation of interleukin-12 production	biological_process	9/1539	13/18668	5.934e-06	1.693e-04	9	TLR2 TIGIT IRAK3 CMKLR1 SLAMF1 IL10 JAK3 MEFV ACP5	8.40
GO:0070672	response to interleukin-15	biological_process	9/1539	13/18668	5.934e-06	1.693e-04	9	IL7R CXCR2 IL2RG IL2RA IL2RB JAK3 IL21R IL9R CXCR1	8.40
GO:0045086	positive regulation of interleukin-2 biosynthetic process	biological_process	8/1539	12/18668	2.170e-05	5.335e-04	8	IRF4 CD86 CD3E PRKCQ CD80 IL1A IL1B FAP	8.09
GO:0031726	CCR1 chemokine receptor binding	molecular_function	4/1539	6/18668	1.601e-03	2.088e-02	4	CCL7 CCL3 CCL5 CCL4	8.09
GO:0072677	eosinophil migration	biological_process	10/1539	15/18668	2.621e-06	8.008e-05	10	CCL7 LGALS2 PTGER4 CCL13 EPO CD300A CCL3 CCL5 ADAM8 CCL11	8.09
GO:0002361	CD4-positive, CD25-positive, alpha-beta regulatory T cell differentiation	biological_process	4/1539	6/18668	1.601e-03	2.088e-02	4	IFNG LGALS9 PLA2G2D FUT7	8.09
GO:0002439	chronic inflammatory response to antigenic stimulus	biological_process	4/1539	6/18668	1.601e-03	2.088e-02	4	TNF IL10 LTA IL1B	8.09
GO:0046645	positive regulation of gamma-delta T cell activation	biological_process	4/1539	6/18668	1.601e-03	2.088e-02	4	LILRB1 NCKAP1L LCK SYK	8.09
GO:0032395	MHC class II receptor activity	molecular_function	8/1539	12/18668	2.170e-05	5.335e-04	8	KRT17 HLA-DPA1 HLA-DRA HLA-DQA2 HLA-DQA1 HLA-DQB2 HLA-DOA HLA-DOB	8.09
GO:0070486	leukocyte aggregation	biological_process	7/1539	11/18668	7.945e-05	1.691e-03	7	RAC2 SEMA4D BMP7 S100A8 CD44 IL1B S100A9	7.72
GO:0016494	C-X-C chemokine receptor activity	molecular_function	5/1539	8/18668	6.850e-04	1.044e-02	5	CXCR4 CXCR2 CXCR6 CXCR3 CXCR1	7.58
GO:0032621	interleukin-18 production	biological_process	5/1539	8/18668	6.850e-04	1.044e-02	5	TLR2 IL10 NLRP3 CD84 GBP5	7.58
GO:0033007	negative regulation of mast cell activation involved in immune response	biological_process	5/1539	8/18668	6.850e-04	1.044e-02	5	CD300A LGALS9 CD84 HMOX1 IL13RA2	7.58
GO:0051798	positive regulation of hair follicle development	biological_process	6/1539	10/18668	2.912e-04	5.161e-03	6	KRT17 GAL TNF HPSE WNT10B TGFB2	7.28
GO:0010759	positive regulation of macrophage chemotaxis	biological_process	6/1539	10/18668	2.912e-04	5.161e-03	6	CCL2 CSF1 CMKLR1 C5AR1 CCL5 C3AR1	7.28
GO:0090023	positive regulation of neutrophil chemotaxis	biological_process	14/1539	24/18668	1.440e-07	5.563e-06	14	XCL1 CXCL3 EDN1 SELL C5AR1 IL1B CD74 RAC2 NCKAP1L CXCL8 CXCL1 LBP C3AR1 MAL	7.08
GO:0002693	positive regulation of cellular extravasation	biological_process	4/1539	7/18668	2.572e-03	2.958e-02	4	ADAM8 CCL2 ICAM1 CCR2	6.93
