# Supplementary material for: High S100A9+ cell density predicts a poor prognosis in hepatocellular carcinoma patients after curative resection
Source: Aging (Albany NY). 2021 Jun 22;13(12):16367–80. doi: 10.18632/aging.203162 (PMC8266308; doi:10.18632/aging.203162)
Supplement: Supplementary Table 5 [file aging-13-203162-s005.xlsx]

## Sheet: Supplementary Table 5. GSEA Ana
Supplementary Table 5. GSEA Analysis for Hallmark Gene Sets.
NAME	GS<br> follow link to MSigDB	GS DETAILS	SIZE	ES	NES	NOM p-val	FDR q-val	FWER p-val	RANK AT MAX	LEADING EDGE
HALLMARK_IL6_JAK_STAT3_SIGNALING	HALLMARK_IL6_JAK_STAT3_SIGNALING	Details ...	87	0.705268	2.13451	0	0.00185185	0.001	8608	tags=64%, list=18%, signal=78%
HALLMARK_ALLOGRAFT_REJECTION	HALLMARK_ALLOGRAFT_REJECTION	Details ...	195	0.765678	2.13085	0	0.000926	0.001	6264	tags=72%, list=13%, signal=83%
HALLMARK_INFLAMMATORY_RESPONSE	HALLMARK_INFLAMMATORY_RESPONSE	Details ...	198	0.672329	2.12532	0	0.000617	0.001	7608	tags=57%, list=16%, signal=67%
HALLMARK_IL2_STAT5_SIGNALING	HALLMARK_IL2_STAT5_SIGNALING	Details ...	195	0.589518	2.04809	0	0.0017435	0.005	7528	tags=50%, list=16%, signal=59%
HALLMARK_TNFA_SIGNALING_VIA_NFKB	HALLMARK_TNFA_SIGNALING_VIA_NFKB	Details ...	198	0.653045	2.03678	0	0.00233797	0.008	8152	tags=58%, list=17%, signal=70%
HALLMARK_COMPLEMENT	HALLMARK_COMPLEMENT	Details ...	200	0.578657	2.01284	0.0019802	0.00233818	0.009	7612	tags=50%, list=16%, signal=59%
HALLMARK_HYPOXIA	HALLMARK_HYPOXIA	Details ...	191	0.540602	1.96692	0	0.00394716	0.017	7419	tags=47%, list=16%, signal=56%
HALLMARK_INTERFERON_GAMMA_RESPONSE	HALLMARK_INTERFERON_GAMMA_RESPONSE	Details ...	198	0.693787	1.94584	0.00401606	0.0040985	0.02	8165	tags=61%, list=17%, signal=73%
HALLMARK_APOPTOSIS	HALLMARK_APOPTOSIS	Details ...	159	0.546825	1.93423	0	0.00439446	0.024	6989	tags=43%, list=15%, signal=51%
HALLMARK_KRAS_SIGNALING_UP	HALLMARK_KRAS_SIGNALING_UP	Details ...	194	0.528955	1.8879	0	0.00664401	0.032	7893	tags=41%, list=17%, signal=49%
HALLMARK_EPITHELIAL_MESENCHYMAL_TRANSITION	HALLMARK_EPITHELIAL_MESENCHYMAL_TRANSITION	Details ...	197	0.566821	1.77516	0.0140281	0.0234837	0.101	10449	tags=59%, list=22%, signal=75%
HALLMARK_APICAL_SURFACE	HALLMARK_APICAL_SURFACE	Details ...	43	0.564303	1.72966	0	0.0304536	0.138	12462	tags=56%, list=26%, signal=75%
HALLMARK_MTORC1_SIGNALING	HALLMARK_MTORC1_SIGNALING	Details ...	195	0.526269	1.71553	0.0218254	0.0308658	0.149	10936	tags=52%, list=23%, signal=68%
HALLMARK_UV_RESPONSE_UP	HALLMARK_UV_RESPONSE_UP	Details ...	154	0.460866	1.6995	0.00402414	0.032191	0.161	8329	tags=44%, list=17%, signal=53%
HALLMARK_GLYCOLYSIS	HALLMARK_GLYCOLYSIS	Details ...	197	0.467503	1.69789	0.00410678	0.0301738	0.163	7653	tags=42%, list=16%, signal=50%
HALLMARK_INTERFERON_ALPHA_RESPONSE	HALLMARK_INTERFERON_ALPHA_RESPONSE	Details ...	95	0.664924	1.68544	0.0286299	0.0311002	0.179	3464	tags=42%, list=7%, signal=45%
HALLMARK_P53_PATHWAY	HALLMARK_P53_PATHWAY	Details ...	193	0.471757	1.67764	0.00207039	0.031108	0.187	8108	tags=42%, list=17%, signal=51%
HALLMARK_PI3K_AKT_MTOR_SIGNALING	HALLMARK_PI3K_AKT_MTOR_SIGNALING	Details ...	104	0.548013	1.67199	0.0123457	0.0314551	0.194	7228	tags=38%, list=15%, signal=45%
HALLMARK_MYC_TARGETS_V2	HALLMARK_MYC_TARGETS_V2	Details ...	58	0.621552	1.64293	0.0375235	0.0383626	0.226	8074	tags=60%, list=17%, signal=73%
HALLMARK_MYC_TARGETS_V1	HALLMARK_MYC_TARGETS_V1	Details ...	194	0.613762	1.64128	0.0318725	0.0368677	0.226	13035	tags=72%, list=27%, signal=98%
HALLMARK_DNA_REPAIR	HALLMARK_DNA_REPAIR		147	0.519726	1.56438	0.0440882	0.0653158	0.327	12031	tags=52%, list=25%, signal=70%
HALLMARK_APICAL_JUNCTION	HALLMARK_APICAL_JUNCTION		194	0.461684	1.55972	0.0387755	0.0643245	0.333	12425	tags=49%, list=26%, signal=67%
HALLMARK_ANGIOGENESIS	HALLMARK_ANGIOGENESIS		36	0.506253	1.53079	0.0522088	0.0755526	0.382	10186	tags=56%, list=21%, signal=71%
HALLMARK_UNFOLDED_PROTEIN_RESPONSE	HALLMARK_UNFOLDED_PROTEIN_RESPONSE		107	0.510853	1.52608	0.0605428	0.0747533	0.386	14819	tags=59%, list=31%, signal=85%
HALLMARK_REACTIVE_OXYGEN_SPECIES_PATHWAY	HALLMARK_REACTIVE_OXYGEN_SPECIES_PATHWAY		47	0.485736	1.52525	0.0632411	0.0718373	0.386	4971	tags=34%, list=10%, signal=38%
HALLMARK_NOTCH_SIGNALING	HALLMARK_NOTCH_SIGNALING		32	0.537729	1.51586	0.0516529	0.0731904	0.401	9416	tags=50%, list=20%, signal=62%
HALLMARK_ESTROGEN_RESPONSE_LATE	HALLMARK_ESTROGEN_RESPONSE_LATE		196	0.369029	1.45568	0.0552147	0.101797	0.483	8534	tags=35%, list=18%, signal=42%
HALLMARK_TGF_BETA_SIGNALING	HALLMARK_TGF_BETA_SIGNALING		54	0.499669	1.41323	0.140816	0.124467	0.536	10180	tags=43%, list=21%, signal=54%
HALLMARK_MYOGENESIS	HALLMARK_MYOGENESIS		198	0.377061	1.39761	0.0686071	0.130078	0.55	11859	tags=37%, list=25%, signal=49%
HALLMARK_CHOLESTEROL_HOMEOSTASIS	HALLMARK_CHOLESTEROL_HOMEOSTASIS		73	0.411481	1.38678	0.122	0.132473	0.561	3092	tags=19%, list=6%, signal=20%
HALLMARK_ESTROGEN_RESPONSE_EARLY	HALLMARK_ESTROGEN_RESPONSE_EARLY		195	0.373505	1.37825	0.11499	0.133887	0.569	8534	tags=35%, list=18%, signal=43%
HALLMARK_E2F_TARGETS	HALLMARK_E2F_TARGETS		195	0.534853	1.37071	0.223108	0.134111	0.577	15006	tags=64%, list=31%, signal=92%
HALLMARK_ANDROGEN_RESPONSE	HALLMARK_ANDROGEN_RESPONSE		96	0.418667	1.36778	0.13786	0.131329	0.578	7543	tags=39%, list=16%, signal=46%
HALLMARK_G2M_CHECKPOINT	HALLMARK_G2M_CHECKPOINT		190	0.524543	1.35811	0.204868	0.132744	0.586	15137	tags=64%, list=32%, signal=93%
HALLMARK_PROTEIN_SECRETION	HALLMARK_PROTEIN_SECRETION		95	0.445627	1.23479	0.278826	0.219832	0.718	11458	tags=37%, list=24%, signal=48%
HALLMARK_MITOTIC_SPINDLE	HALLMARK_MITOTIC_SPINDLE		198	0.445027	1.22026	0.30621	0.224386	0.727	15061	tags=52%, list=32%, signal=76%
HALLMARK_COAGULATION	HALLMARK_COAGULATION		138	0.299544	1.10291	0.309237	0.325507	0.813	10100	tags=38%, list=21%, signal=49%
HALLMARK_UV_RESPONSE_DN	HALLMARK_UV_RESPONSE_DN		138	0.346326	1.0847	0.394683	0.334053	0.829	10486	tags=31%, list=22%, signal=40%
HALLMARK_SPERMATOGENESIS	HALLMARK_SPERMATOGENESIS		133	0.302691	1.07713	0.364729	0.332474	0.832	12395	tags=35%, list=26%, signal=47%
HALLMARK_HEDGEHOG_SIGNALING	HALLMARK_HEDGEHOG_SIGNALING		35	0.372209	1.05811	0.427699	0.3431	0.847	8723	tags=34%, list=18%, signal=42%
HALLMARK_KRAS_SIGNALING_DN	HALLMARK_KRAS_SIGNALING_DN		194	0.246629	1.00811	0.41498	0.385706	0.872	16275	tags=39%, list=34%, signal=58%
HALLMARK_HEME_METABOLISM	HALLMARK_HEME_METABOLISM		192	0.254228	0.886495	0.595876	0.520831	0.934	9539	tags=28%, list=20%, signal=34%
HALLMARK_WNT_BETA_CATENIN_SIGNALING	HALLMARK_WNT_BETA_CATENIN_SIGNALING		42	0.301225	0.868839	0.596639	0.532642	0.943	14627	tags=45%, list=31%, signal=65%
HALLMARK_OXIDATIVE_PHOSPHORYLATION	HALLMARK_OXIDATIVE_PHOSPHORYLATION		184	0.255715	0.833905	0.627863	0.565531	0.952	11624	tags=34%, list=24%, signal=44%
